# Supplementary material for: Burden of disease in Brazil, 1990–2016: a systematic subnational analysis for the Global Burden of Disease Study 2016
Source: PubMed Central journal article supplement (PMC6123514; doi:10.1016/s0140-6736(18)31221-2), 2018-09-01
Supplement: mmc1.pdf [file mmc1.pdf]

# THE LANCET

## **Supplementary appendix**

This appendix formed part of the original submission and has been peer reviewed. We post it as supplied by the authors.

Supplement to: GBD 2016 Brazil Collaborators. Burden of disease in Brazil, 1990–2016: a systematic subnational analysis for the Global Burden of Disease Study 2016. *Lancet* 2018; published online July 20. [http://dx.doi.org/10.1016/S0140-6736\(18\)31221-2](http://dx.doi.org/10.1016/S0140-6736(18)31221-2).

Appendix Table 1: Total number of site years by cause and source type, cause of death estimates, 1990-2016, Brazil

| Level | Cause                                                                         | Vital Registration | Verbal Autopsy | Surveillance | Sibling History | Survey/Census | Cancer Registry | Police Records |
|-------|-------------------------------------------------------------------------------|--------------------|----------------|--------------|-----------------|---------------|-----------------|----------------|
| 0     | All causes                                                                    | 683                | 2              |              | 196             |               | 252             |                |
| 1     | Communicable, maternal, neonatal, and nutritional diseases                    | 683                | 2              |              | 196             |               |                 |                |
| 2     | HIV/AIDS and tuberculosis                                                     | 683                |                |              |                 |               |                 |                |
| 3     | Tuberculosis                                                                  | 683                |                |              |                 |               |                 |                |
| 4     | Drug-susceptible tuberculosis                                                 | 683                |                |              |                 |               |                 |                |
| 4     | Multidrug-resistant tuberculosis without extensive drug resistance            | 545                |                |              |                 |               |                 |                |
| 4     | Extensively drug-resistant tuberculosis                                       |                    |                |              |                 |               |                 |                |
| 3     | HIV/AIDS                                                                      | 683                |                |              |                 |               |                 |                |
| 4     | Drug-susceptible HIV/AIDS - Tuberculosis                                      | 546                |                |              |                 |               |                 |                |
| 4     | Multidrug-resistant HIV/AIDS - Tuberculosis without extensive drug resistance |                    |                |              |                 |               |                 |                |
| 4     | Extensively drug-resistant HIV/AIDS - Tuberculosis                            |                    |                |              |                 |               |                 |                |
| 4     | HIV/AIDS resulting in other diseases                                          | 683                |                |              |                 |               |                 |                |
| 2     | Diarrhea, lower respiratory, and other common infectious diseases             | 683                | 2              |              |                 |               |                 |                |
| 3     | Diarrheal diseases                                                            | 683                | 2              |              |                 |               |                 |                |
| 3     | Intestinal infectious diseases                                                | 682                |                |              |                 |               |                 |                |
| 4     | Typhoid fever                                                                 | 682                |                |              |                 |               |                 |                |
| 4     | Paratyphoid fever                                                             | 682                |                |              |                 |               |                 |                |
| 4     | Other intestinal infectious diseases                                          | 682                |                |              |                 |               |                 |                |
| 3     | Lower respiratory infections                                                  | 683                | 2              |              |                 |               |                 |                |
| 3     | Upper respiratory infections                                                  | 682                |                |              |                 |               |                 |                |
| 3     | Otitis media                                                                  | 680                |                |              |                 |               |                 |                |
| 3     | Meningitis                                                                    | 683                | 1              |              |                 |               |                 |                |
| 4     | Pneumococcal meningitis                                                       | 683                |                |              |                 |               |                 |                |
| 4     | H influenzae type B meningitis                                                | 683                |                |              |                 |               |                 |                |
| 4     | Meningococcal meningitis                                                      | 683                |                |              |                 |               |                 |                |
| 4     | Other meningitis                                                              | 683                |                |              |                 |               |                 |                |
| 3     | Encephalitis                                                                  | 683                |                |              |                 |               |                 |                |
| 3     | Diphtheria                                                                    | 672                |                |              |                 |               |                 |                |
| 3     | Whooping cough                                                                | 677                |                |              |                 |               |                 |                |
| 3     | Tetanus                                                                       | 682                | 1              |              |                 |               |                 |                |
| 3     | Measles                                                                       | 683                |                |              |                 |               |                 |                |
| 3     | Varicella and herpes zoster                                                   | 683                |                |              |                 |               |                 |                |
| 2     | Neglected tropical diseases and malaria                                       | 683                |                |              |                 |               |                 |                |
| 3     | Malaria                                                                       | 680                |                |              |                 |               |                 |                |
| 3     | Chagas disease                                                                | 683                |                |              |                 |               |                 |                |
| 3     | Leishmaniasis                                                                 | 682                |                |              |                 |               |                 |                |
| 4     | Visceral leishmaniasis                                                        | 682                |                |              |                 |               |                 |                |
| 3     | African trypanosomiasis                                                       | 679                |                |              |                 |               |                 |                |
| 3     | Schistosomiasis                                                               | 680                |                |              |                 |               |                 |                |
| 3     | Cysticercosis                                                                 | 680                |                |              |                 |               |                 |                |
| 3     | Cystic echinococcosis                                                         | 680                |                |              |                 |               |                 |                |
| 3     | Dengue                                                                        | 680                |                |              |                 |               |                 |                |
| 3     | Yellow fever                                                                  | 680                |                |              |                 |               |                 |                |
| 3     | Rabies                                                                        | 680                |                |              |                 |               |                 |                |
| 3     | Intestinal nematode infections                                                | 682                |                |              |                 |               |                 |                |
| 4     | Ascariasis                                                                    | 682                |                |              |                 |               |                 |                |
| 3     | Ebola                                                                         | 3                  |                |              |                 |               |                 |                |
| 3     | Zika virus                                                                    | 545                |                |              |                 |               |                 |                |
| 3     | Other neglected tropical diseases                                             | 680                |                |              |                 |               |                 |                |
| 2     | Maternal disorders                                                            | 683                |                |              | 196             |               |                 |                |

|   |                                                                  |     |   |  |     |  |     |
|---|------------------------------------------------------------------|-----|---|--|-----|--|-----|
| 3 | Maternal hemorrhage                                              | 680 |   |  |     |  |     |
| 3 | Maternal sepsis and other maternal infections                    | 681 |   |  |     |  |     |
| 3 | Maternal hypertensive disorders                                  | 678 |   |  |     |  |     |
| 3 | Maternal obstructed labor and uterine rupture                    | 680 |   |  |     |  |     |
| 3 | Maternal abortion, miscarriage, and ectopic pregnancy            | 682 |   |  |     |  |     |
| 3 | Indirect maternal deaths                                         | 649 |   |  |     |  |     |
| 3 | Late maternal deaths                                             | 504 |   |  |     |  |     |
| 3 | Maternal deaths aggravated by HIV/AIDS                           | 683 |   |  | 196 |  |     |
| 3 | Other maternal disorders                                         | 681 |   |  |     |  |     |
| 2 | Neonatal disorders                                               | 683 | 2 |  |     |  |     |
| 3 | Neonatal preterm birth complications                             | 683 | 1 |  |     |  |     |
| 3 | Neonatal encephalopathy due to birth asphyxia and trauma         | 683 | 1 |  |     |  |     |
| 3 | Neonatal sepsis and other neonatal infections                    | 682 |   |  |     |  |     |
| 3 | Hemolytic disease and other neonatal jaundice                    | 683 |   |  |     |  |     |
| 3 | Other neonatal disorders                                         | 683 |   |  |     |  |     |
| 2 | Nutritional deficiencies                                         | 683 | 1 |  |     |  |     |
| 3 | Protein-energy malnutrition                                      | 683 |   |  |     |  |     |
| 3 | Iodine deficiency                                                | 127 |   |  |     |  |     |
| 3 | Iron-deficiency anemia                                           | 683 |   |  |     |  |     |
| 3 | Other nutritional deficiencies                                   | 683 |   |  |     |  |     |
| 2 | Other communicable, maternal, neonatal, and nutritional diseases | 683 | 1 |  |     |  |     |
| 3 | Sexually transmitted diseases excluding HIV                      | 683 |   |  |     |  |     |
| 4 | Syphilis                                                         | 680 |   |  |     |  |     |
| 4 | Chlamydial infection                                             | 683 |   |  |     |  |     |
| 4 | Gonococcal infection                                             | 683 |   |  |     |  |     |
| 4 | Other sexually transmitted diseases                              | 683 |   |  |     |  |     |
| 3 | Hepatitis                                                        | 682 | 1 |  |     |  |     |
| 4 | Acute hepatitis A                                                | 682 |   |  |     |  |     |
| 4 | Hepatitis B                                                      | 681 |   |  |     |  |     |
| 4 | Hepatitis C                                                      | 679 |   |  |     |  |     |
| 4 | Acute hepatitis E                                                | 679 |   |  |     |  |     |
| 3 | Other infectious diseases                                        | 683 |   |  |     |  |     |
| 1 | Non-communicable diseases                                        | 683 | 2 |  |     |  | 252 |
| 2 | Neoplasms                                                        | 683 |   |  |     |  | 252 |
| 3 | Lip and oral cavity cancer                                       | 683 |   |  |     |  | 245 |
| 3 | Nasopharynx cancer                                               | 683 |   |  |     |  | 223 |
| 3 | Other pharynx cancer                                             | 683 |   |  |     |  | 242 |
| 3 | Esophageal cancer                                                | 683 |   |  |     |  | 245 |
| 3 | Stomach cancer                                                   | 683 |   |  |     |  | 247 |
| 3 | Colon and rectum cancer                                          | 683 |   |  |     |  | 247 |
| 3 | Liver cancer                                                     | 683 |   |  |     |  | 246 |
| 4 | Liver cancer due to hepatitis B                                  |     |   |  |     |  |     |
| 4 | Liver cancer due to hepatitis C                                  |     |   |  |     |  |     |
| 4 | Liver cancer due to alcohol use                                  |     |   |  |     |  |     |
| 4 | Liver cancer due to other causes                                 |     |   |  |     |  |     |
| 3 | Gallbladder and biliary tract cancer                             | 683 |   |  |     |  | 242 |
| 3 | Pancreatic cancer                                                | 683 |   |  |     |  | 244 |
| 3 | Larynx cancer                                                    | 683 |   |  |     |  | 244 |
| 3 | Tracheal, bronchus, and lung cancer                              | 683 |   |  |     |  | 247 |

|   |                                   |     |  |  |  |  |     |  |
|---|-----------------------------------|-----|--|--|--|--|-----|--|
| 3 | Malignant skin melanoma           | 683 |  |  |  |  | 247 |  |
| 3 | Non-melanoma skin cancer          | 683 |  |  |  |  |     |  |
|   | Non-melanoma skin cancer          |     |  |  |  |  |     |  |
| 4 | (squamous-cell carcinoma)         | 683 |  |  |  |  |     |  |
| 3 | Breast cancer                     | 683 |  |  |  |  | 247 |  |
| 3 | Cervical cancer                   | 683 |  |  |  |  | 247 |  |
| 3 | Uterine cancer                    | 683 |  |  |  |  | 246 |  |
| 3 | Ovarian cancer                    | 683 |  |  |  |  | 247 |  |
| 3 | Prostate cancer                   | 683 |  |  |  |  | 247 |  |
| 3 | Testicular cancer                 | 683 |  |  |  |  | 233 |  |
| 3 | Kidney cancer                     | 683 |  |  |  |  | 244 |  |
| 3 | Bladder cancer                    | 683 |  |  |  |  | 244 |  |
|   | Brain and nervous system          |     |  |  |  |  |     |  |
| 3 | cancer                            | 683 |  |  |  |  | 246 |  |
| 3 | Thyroid cancer                    | 683 |  |  |  |  | 244 |  |
| 3 | Mesothelioma                      | 546 |  |  |  |  |     |  |
| 3 | Hodgkin lymphoma                  | 683 |  |  |  |  | 241 |  |
| 3 | Non-Hodgkin lymphoma              | 683 |  |  |  |  | 246 |  |
| 3 | Multiple myeloma                  | 683 |  |  |  |  | 239 |  |
| 3 | Leukemia                          | 683 |  |  |  |  | 252 |  |
| 4 | Acute lymphoid leukemia           | 683 |  |  |  |  | 243 |  |
| 4 | Chronic lymphoid leukemia         | 683 |  |  |  |  | 230 |  |
| 4 | Acute myeloid leukemia            | 683 |  |  |  |  | 239 |  |
| 4 | Chronic myeloid leukemia          | 683 |  |  |  |  | 242 |  |
| 4 | Other leukemia                    | 683 |  |  |  |  | 241 |  |
| 3 | Other neoplasms                   | 683 |  |  |  |  | 252 |  |
| 2 | Cardiovascular diseases           | 683 |  |  |  |  |     |  |
| 3 | Rheumatic heart disease           | 683 |  |  |  |  |     |  |
| 3 | Ischemic heart disease            | 683 |  |  |  |  |     |  |
| 3 | Cerebrovascular disease           | 683 |  |  |  |  |     |  |
| 4 | Ischemic stroke                   | 683 |  |  |  |  |     |  |
| 4 | Hemorrhagic stroke                | 683 |  |  |  |  |     |  |
| 3 | Hypertensive heart disease        | 683 |  |  |  |  |     |  |
|   | Cardiomyopathy and                |     |  |  |  |  |     |  |
| 3 | myocarditis                       | 683 |  |  |  |  |     |  |
| 4 | Myocarditis                       | 683 |  |  |  |  |     |  |
| 4 | Alcoholic cardiomyopathy          | 683 |  |  |  |  |     |  |
| 4 | Other cardiomyopathy              | 683 |  |  |  |  |     |  |
| 3 | Atrial fibrillation and flutter   | 680 |  |  |  |  |     |  |
| 3 | Aortic aneurysm                   | 683 |  |  |  |  |     |  |
| 3 | Peripheral artery disease         | 675 |  |  |  |  |     |  |
| 3 | Endocarditis                      | 683 |  |  |  |  |     |  |
|   | Other cardiovascular and          |     |  |  |  |  |     |  |
| 3 | circulatory diseases              | 683 |  |  |  |  |     |  |
| 2 | Chronic respiratory diseases      | 683 |  |  |  |  |     |  |
|   | Chronic obstructive pulmonary     |     |  |  |  |  |     |  |
| 3 | disease                           | 683 |  |  |  |  |     |  |
| 3 | Pneumoconiosis                    | 682 |  |  |  |  |     |  |
| 4 | Silicosis                         | 681 |  |  |  |  |     |  |
| 4 | Asbestosis                        | 682 |  |  |  |  |     |  |
|   | Coal workers pneumoconiosis       |     |  |  |  |  |     |  |
| 4 |                                   | 681 |  |  |  |  |     |  |
| 4 | Other pneumoconiosis              | 681 |  |  |  |  |     |  |
| 3 | Asthma                            | 682 |  |  |  |  |     |  |
|   | Interstitial lung disease and     |     |  |  |  |  |     |  |
| 3 | pulmonary sarcoidosis             | 682 |  |  |  |  |     |  |
|   | Other chronic respiratory         |     |  |  |  |  |     |  |
| 3 | diseases                          | 683 |  |  |  |  |     |  |
|   | Cirrhosis and other chronic       |     |  |  |  |  |     |  |
| 2 | liver diseases                    | 683 |  |  |  |  |     |  |
|   | Cirrhosis and other chronic       |     |  |  |  |  |     |  |
| 3 | liver diseases due to hepatitis B |     |  |  |  |  |     |  |
|   | Cirrhosis and other chronic       |     |  |  |  |  |     |  |
| 3 | liver diseases due to hepatitis C |     |  |  |  |  |     |  |
|   | Cirrhosis and other chronic       |     |  |  |  |  |     |  |
| 3 | liver diseases due to alcohol use |     |  |  |  |  |     |  |

|   |                                                                |     |  |  |  |  |  |  |
|---|----------------------------------------------------------------|-----|--|--|--|--|--|--|
| 3 | Cirrhosis and other chronic liver diseases due to other causes |     |  |  |  |  |  |  |
| 2 | Digestive diseases                                             | 683 |  |  |  |  |  |  |
| 3 | Peptic ulcer disease                                           | 683 |  |  |  |  |  |  |
| 3 | Gastritis and duodenitis                                       | 683 |  |  |  |  |  |  |
| 3 | Appendicitis                                                   | 683 |  |  |  |  |  |  |
| 3 | Paralytic ileus and intestinal obstruction                     | 683 |  |  |  |  |  |  |
| 3 | Inguinal, femoral, and abdominal hernia                        | 683 |  |  |  |  |  |  |
| 3 | Inflammatory bowel disease                                     | 683 |  |  |  |  |  |  |
| 3 | Vascular intestinal disorders                                  | 682 |  |  |  |  |  |  |
| 3 | Gallbladder and biliary diseases                               | 683 |  |  |  |  |  |  |
| 3 | Pancreatitis                                                   | 683 |  |  |  |  |  |  |
| 3 | Other digestive diseases                                       | 683 |  |  |  |  |  |  |
| 2 | Neurological disorders                                         | 683 |  |  |  |  |  |  |
| 3 | Alzheimer disease and other dementias                          | 678 |  |  |  |  |  |  |
| 3 | Parkinson disease                                              | 679 |  |  |  |  |  |  |
| 3 | Epilepsy                                                       | 682 |  |  |  |  |  |  |
| 3 | Multiple sclerosis                                             | 572 |  |  |  |  |  |  |
| 3 | Motor neuron disease                                           | 681 |  |  |  |  |  |  |
| 3 | Other neurological disorders                                   | 683 |  |  |  |  |  |  |
| 2 | Mental and substance use disorders                             | 683 |  |  |  |  |  |  |
| 3 | Alcohol use disorders                                          | 683 |  |  |  |  |  |  |
| 3 | Drug use disorders                                             | 683 |  |  |  |  |  |  |
| 4 | Opioid use disorders                                           | 683 |  |  |  |  |  |  |
| 4 | Cocaine use disorders                                          | 682 |  |  |  |  |  |  |
| 4 | Amphetamine use disorders                                      | 682 |  |  |  |  |  |  |
| 4 | Other drug use disorders                                       | 682 |  |  |  |  |  |  |
| 3 | Eating disorders                                               | 678 |  |  |  |  |  |  |
| 4 | Anorexia nervosa                                               | 678 |  |  |  |  |  |  |
| 4 | Bulimia nervosa                                                | 665 |  |  |  |  |  |  |
| 2 | Diabetes, urogenital, blood, and endocrine diseases            | 683 |  |  |  |  |  |  |
| 3 | Diabetes mellitus                                              | 683 |  |  |  |  |  |  |
| 3 | Acute glomerulonephritis                                       | 683 |  |  |  |  |  |  |
| 3 | Chronic kidney disease                                         | 683 |  |  |  |  |  |  |
| 4 | Chronic kidney disease due to diabetes mellitus                | 683 |  |  |  |  |  |  |
| 4 | Chronic kidney disease due to hypertension                     | 683 |  |  |  |  |  |  |
| 4 | Chronic kidney disease due to glomerulonephritis               | 683 |  |  |  |  |  |  |
| 4 | Chronic kidney disease due to other causes                     | 683 |  |  |  |  |  |  |
| 3 | Urinary diseases and male infertility                          | 683 |  |  |  |  |  |  |
| 4 | Interstitial nephritis and urinary tract infections            | 683 |  |  |  |  |  |  |
| 4 | Urolithiasis                                                   | 683 |  |  |  |  |  |  |
| 4 | Other urinary diseases                                         | 683 |  |  |  |  |  |  |
| 3 | Gynecological diseases                                         | 683 |  |  |  |  |  |  |
| 4 | Uterine fibroids                                               | 683 |  |  |  |  |  |  |
| 4 | Polycystic ovarian syndrome                                    | 591 |  |  |  |  |  |  |
| 4 | Endometriosis                                                  | 613 |  |  |  |  |  |  |
| 4 | Genital prolapse                                               | 663 |  |  |  |  |  |  |
| 4 | Other gynecological diseases                                   | 683 |  |  |  |  |  |  |
| 3 | Hemoglobinopathies and hemolytic anemias                       | 683 |  |  |  |  |  |  |
| 4 | Thalassemias                                                   | 683 |  |  |  |  |  |  |
| 4 | Sickle cell disorders                                          | 683 |  |  |  |  |  |  |
| 4 | G6PD deficiency                                                | 59  |  |  |  |  |  |  |
| 4 | Other hemoglobinopathies and hemolytic anemias                 | 681 |  |  |  |  |  |  |

|   |                                                   |     |   |  |  |  |  |
|---|---------------------------------------------------|-----|---|--|--|--|--|
| 3 | Endocrine, metabolic, blood, and immune disorders | 683 |   |  |  |  |  |
| 2 | Musculoskeletal disorders                         | 683 |   |  |  |  |  |
| 3 | Rheumatoid arthritis                              | 681 |   |  |  |  |  |
| 3 | Other musculoskeletal disorders                   | 683 |   |  |  |  |  |
| 2 | Other non-communicable diseases                   | 683 | 2 |  |  |  |  |
| 3 | Congenital birth defects                          | 683 | 2 |  |  |  |  |
| 4 | Neural tube defects                               | 683 |   |  |  |  |  |
| 4 | Congenital heart anomalies                        | 683 |   |  |  |  |  |
| 4 | Orofacial clefts                                  | 582 |   |  |  |  |  |
| 4 | Down syndrome                                     | 678 |   |  |  |  |  |
| 4 | Other chromosomal abnormalities                   | 679 |   |  |  |  |  |
| 4 | Congenital musculoskeletal and limb anomalies     | 678 |   |  |  |  |  |
| 4 | Urogenital congenital anomalies                   | 682 |   |  |  |  |  |
| 4 | Digestive congenital anomalies                    | 683 |   |  |  |  |  |
| 4 | Other congenital birth defects                    | 683 |   |  |  |  |  |
| 3 | Skin and subcutaneous diseases                    | 683 |   |  |  |  |  |
| 4 | Cellulitis                                        | 683 |   |  |  |  |  |
| 4 | Pyoderma                                          | 683 |   |  |  |  |  |
| 4 | Decubitus ulcer                                   | 680 |   |  |  |  |  |
| 4 | Other skin and subcutaneous diseases              | 680 |   |  |  |  |  |
| 3 | Sudden infant death syndrome                      | 553 |   |  |  |  |  |
| 1 | Injuries                                          | 683 |   |  |  |  |  |
| 2 | Transport injuries                                | 683 |   |  |  |  |  |
| 3 | Road injuries                                     | 683 |   |  |  |  |  |
| 4 | Pedestrian road injuries                          | 683 |   |  |  |  |  |
| 4 | Cyclist road injuries                             | 683 |   |  |  |  |  |
| 4 | Motorecyclist road injuries                       | 683 |   |  |  |  |  |
| 4 | Motor vehicle road injuries                       | 683 |   |  |  |  |  |
| 4 | Other road injuries                               | 683 |   |  |  |  |  |
| 3 | Other transport injuries                          | 683 |   |  |  |  |  |
| 2 | Unintentional injuries                            | 683 |   |  |  |  |  |
| 3 | Falls                                             | 683 |   |  |  |  |  |
| 3 | Drowning                                          | 683 |   |  |  |  |  |
| 3 | Fire, heat, and hot substances                    | 683 |   |  |  |  |  |
| 3 | Poisonings                                        | 683 |   |  |  |  |  |
| 3 | Exposure to mechanical forces                     | 683 |   |  |  |  |  |
| 4 | Unintentional firearm injuries                    | 683 |   |  |  |  |  |
| 4 | Unintentional suffocation                         | 683 |   |  |  |  |  |
| 4 | Other exposure to mechanical forces               | 683 |   |  |  |  |  |
| 3 | Adverse effects of medical treatment              | 683 |   |  |  |  |  |
| 3 | Animal contact                                    | 683 |   |  |  |  |  |
| 4 | Venomous animal contact                           | 683 |   |  |  |  |  |
| 4 | Non-venomous animal contact                       | 683 |   |  |  |  |  |
| 3 | Foreign body                                      | 683 |   |  |  |  |  |
| 4 | Pulmonary aspiration and foreign body in airway   | 683 |   |  |  |  |  |
| 4 | Foreign body in other body part                   | 682 |   |  |  |  |  |
| 3 | Environmental heat and cold exposure              | 683 |   |  |  |  |  |
| 3 | Other unintentional injuries                      | 683 |   |  |  |  |  |
| 2 | Self-harm and interpersonal violence              | 683 |   |  |  |  |  |

|   |                                                                              |     |  |  |  |  |  |  |
|---|------------------------------------------------------------------------------|-----|--|--|--|--|--|--|
| 3 | Self-harm                                                                    | 683 |  |  |  |  |  |  |
| 4 | Self-harm by firearm                                                         | 683 |  |  |  |  |  |  |
| 4 | Self-harm by other specified means                                           | 683 |  |  |  |  |  |  |
| 3 | Interpersonal violence                                                       | 683 |  |  |  |  |  |  |
| 4 | Physical violence by firearm                                                 | 683 |  |  |  |  |  |  |
| 4 | Physical violence by sharp object                                            | 683 |  |  |  |  |  |  |
| 4 | Physical violence by other means                                             | 683 |  |  |  |  |  |  |
| 2 | Forces of nature, conflict and terrorism, and executions and police conflict | 683 |  |  |  |  |  |  |
| 3 | Exposure to forces of nature                                                 | 681 |  |  |  |  |  |  |
| 3 | Conflict and terrorism                                                       | 683 |  |  |  |  |  |  |
| 3 | Executions and police conflict                                               | 668 |  |  |  |  |  |  |

Appendix Table 2: Data used in Brazil non-fatal estimates, GBD 2016

| Cause                                                                         | Citation                                                                                                                                                                                                                                                                                                                                                              | Coverage | Years     | Data type             |
|-------------------------------------------------------------------------------|-----------------------------------------------------------------------------------------------------------------------------------------------------------------------------------------------------------------------------------------------------------------------------------------------------------------------------------------------------------------------|----------|-----------|-----------------------|
| HIV/AIDS and tuberculosis                                                     | World Health Organization (WHO). WHO Tuberculosis Case Notifications. Geneva, Switzerland: World Health Organization (WHO).                                                                                                                                                                                                                                           | Global   | 2003-2014 | Epi surveillance      |
| Tuberculosis                                                                  | Institute for Health Metrics and Evaluation (IHME). IHME GBD 2015 DisMod HIV-TB Corrected Cause-specific Mortality Rate Estimates.                                                                                                                                                                                                                                    | Global   | 1990-2016 | Modeled data          |
| Tuberculosis                                                                  | Institute for Health Metrics and Evaluation (IHME). IHME GBD 2015 DisMod All Causes Excess Mortality Estimates.                                                                                                                                                                                                                                                       | Global   | 2000-2015 | Modeled data          |
| Tuberculosis                                                                  | Camacho LA, Klein CH. [Risk of tubercular infection among schoolchildren with high BCG coverage]. . 1990; 108(2): 1002.                                                                                                                                                                                                                                               |          | 1986      | Scientific literature |
| Tuberculosis                                                                  | Ministry of Health (Brazil). Brazil Information System for Notifiable Diseases 2010.                                                                                                                                                                                                                                                                                  | Country  | 2010      | Epi surveillance      |
| Tuberculosis                                                                  | Ministry of Health (Brazil). Brazil Information System for Notifiable Diseases 2013.                                                                                                                                                                                                                                                                                  | Country  | 2013      | Epi surveillance      |
| Tuberculosis                                                                  | Ministry of Health (Brazil). Brazil Information System for Notifiable Diseases 2006.                                                                                                                                                                                                                                                                                  | Country  | 2006      | Epi surveillance      |
| Tuberculosis                                                                  | World Health Organization (WHO). WHO Tuberculosis Case Notifications. Geneva, Switzerland: World Health Organization (WHO).                                                                                                                                                                                                                                           | Global   | 2000-2015 | Epi surveillance      |
| Tuberculosis                                                                  | LC: A comparison of dual skin test with mycobacterial antigens and tuberculin skin test alone in estimating prevalence of Mycobacterium tuberculosis infection from population surveys. . 2003; 7(4): 312-319.                                                                                                                                                        |          | 1998      | Scientific literature |
| Multidrug-resistant tuberculosis without extensive drug resistance            | World Health Organization (WHO). WHO Global Project on Anti-Tuberculosis Drug Resistance Surveillance Data 1988-2015.                                                                                                                                                                                                                                                 | Global   | 2008      | Survey                |
| HIV/AIDS                                                                      | Ministry of Health (Brazil). Brazil Mortality Information System - Deaths 1988. Rio de Janeiro, Brazil: Ministry of Health (Brazil).                                                                                                                                                                                                                                  | Country  | 1988      | Vital registration    |
| HIV/AIDS                                                                      | Ministry of Health (Brazil). Brazil Mortality Information System - Deaths 2005. Rio de Janeiro, Brazil: Ministry of Health (Brazil).                                                                                                                                                                                                                                  | Country  | 2005      | Vital registration    |
| HIV/AIDS                                                                      | Ministry of Health (Brazil). Brazil Mortality Information System - Deaths 1989. Rio de Janeiro, Brazil: Ministry of Health (Brazil).                                                                                                                                                                                                                                  | Country  | 1989      | Vital registration    |
| HIV/AIDS                                                                      | Ministry of Health (Brazil). Brazil Mortality Information System - Deaths 2004. Rio de Janeiro, Brazil: Ministry of Health (Brazil).                                                                                                                                                                                                                                  | Country  | 2004      | Vital registration    |
| HIV/AIDS                                                                      | Ministry of Health (Brazil). Brazil Mortality Information System - Deaths 1990. Rio de Janeiro, Brazil: Ministry of Health (Brazil).                                                                                                                                                                                                                                  | Country  | 1990      | Vital registration    |
| HIV/AIDS                                                                      | Ministry of Health (Brazil). Brazil Mortality Information System - Deaths 2003. Rio de Janeiro, Brazil: Ministry of Health (Brazil).                                                                                                                                                                                                                                  | Country  | 2003      | Vital registration    |
| HIV/AIDS                                                                      | Ministry of Health (Brazil). Brazil Mortality Information System - Deaths 1991. Rio de Janeiro, Brazil: Ministry of Health (Brazil).                                                                                                                                                                                                                                  | Country  | 1991      | Vital registration    |
| HIV/AIDS                                                                      | Ministry of Health (Brazil). Brazil Mortality Information System - Deaths 2006. Rio de Janeiro, Brazil: Ministry of Health (Brazil).                                                                                                                                                                                                                                  | Country  | 2006      | Vital registration    |
| HIV/AIDS                                                                      | Ministry of Health (Brazil). Brazil Mortality Information System - Deaths 1992. Rio de Janeiro, Brazil: Ministry of Health (Brazil).                                                                                                                                                                                                                                  | Country  | 1992      | Vital registration    |
| HIV/AIDS                                                                      | Ministry of Health (Brazil). Brazil Mortality Information System - Deaths 1987. Rio de Janeiro, Brazil: Ministry of Health (Brazil).                                                                                                                                                                                                                                  | Country  | 1987      | Vital registration    |
| HIV/AIDS                                                                      | Ministry of Health (Brazil). Brazil Mortality Information System - Deaths 2001. Rio de Janeiro, Brazil: Ministry of Health (Brazil).                                                                                                                                                                                                                                  | Country  | 2001      | Vital registration    |
| HIV/AIDS                                                                      | Ministry of Health (Brazil). Brazil Mortality Information System - Deaths 1993. Rio de Janeiro, Brazil: Ministry of Health (Brazil).                                                                                                                                                                                                                                  | Country  | 1993      | Vital registration    |
| HIV/AIDS                                                                      | Ministry of Health (Brazil). Brazil Mortality Information System - Deaths 2000. Rio de Janeiro, Brazil: Ministry of Health (Brazil).                                                                                                                                                                                                                                  | Country  | 2000      | Vital registration    |
| HIV/AIDS                                                                      | Ministry of Health (Brazil). Brazil Mortality Information System - Deaths 1994. Rio de Janeiro, Brazil: Ministry of Health (Brazil).                                                                                                                                                                                                                                  | Country  | 1994      | Vital registration    |
| HIV/AIDS                                                                      | Ministry of Health (Brazil). Brazil Mortality Information System - Deaths 1999. Rio de Janeiro, Brazil: Ministry of Health (Brazil).                                                                                                                                                                                                                                  | Country  | 1999      | Vital registration    |
| HIV/AIDS                                                                      | Ministry of Health (Brazil). Brazil Mortality Information System - Deaths 1995. Rio de Janeiro, Brazil: Ministry of Health (Brazil).                                                                                                                                                                                                                                  | Country  | 1995      | Vital registration    |
| HIV/AIDS                                                                      | Ministry of Health (Brazil). Brazil Mortality Information System - Deaths 1998. Rio de Janeiro, Brazil: Ministry of Health (Brazil).                                                                                                                                                                                                                                  | Country  | 1998      | Vital registration    |
| HIV/AIDS                                                                      | Ministry of Health (Brazil). Brazil Mortality Information System - Deaths 2002. Rio de Janeiro, Brazil: Ministry of Health (Brazil).                                                                                                                                                                                                                                  | Country  | 2002      | Vital registration    |
| HIV/AIDS                                                                      | Ministry of Health (Brazil). Brazil Mortality Information System - Deaths 2007. Rio de Janeiro, Brazil: Ministry of Health (Brazil).                                                                                                                                                                                                                                  | Country  | 2007      | Vital registration    |
| HIV/AIDS                                                                      | Ministry of Health (Brazil). Brazil Mortality Information System - Deaths 1984. Rio de Janeiro, Brazil: Ministry of Health (Brazil).                                                                                                                                                                                                                                  | Country  | 1984      | Vital registration    |
| HIV/AIDS                                                                      | Ministry of Health (Brazil). Brazil Mortality Information System - Deaths 2008. Rio de Janeiro, Brazil: Ministry of Health (Brazil).                                                                                                                                                                                                                                  | Country  | 2008      | Vital registration    |
| HIV/AIDS                                                                      | Ministry of Health (Brazil). Brazil Mortality Information System - Deaths 2015.                                                                                                                                                                                                                                                                                       | Country  | 2015      | Vital registration    |
| HIV/AIDS                                                                      | Carriguir G, Fink V, Koethe JR, Giganti MJ, Jayathilake K, Blevins M, Cahn P, Grinsztejn B, Wolff M, Pape JW, Padgett D, Madero JS, Gotuzzo E, McGowan CC, Shepherd BE. Mortality and loss to follow-up among HIV-infected persons on long-term antiretroviral therapy in Latin America and the Caribbean. . 2015; 18: 20016.                                         |          | 2000-2014 | Scientific literature |
| HIV/AIDS                                                                      | Ministry of Health (Brazil). Brazil Mortality Information System - Deaths 2014.                                                                                                                                                                                                                                                                                       | Country  | 2014      | Vital registration    |
| HIV/AIDS                                                                      | Tuboi SH, Schechter M, McGowan CC, Cesar C, Krolewiecki A, Cahn P, Wolff M, Pape JW, Padgett D, Madero JS, Gotuzzo E, Masys DR, Shepherd BE. Mortality during the first year of potent antiretroviral therapy in HIV-1-infected patients in 7 sites throughout Latin America and the Caribbean. . 2009; 51(5): 615-23.                                                |          | 1996-2007 | Scientific literature |
| HIV/AIDS                                                                      | Hunter R, Vasquez-Mora G, Quava-Jones A, Adomah N, Peter Figueroa J, Liautaud B, Torres M, Pape JW. Long-term antiretroviral treatment outcomes in seven countries in the Caribbean. . 2012; 59(4): e60-71.                                                                                                                                                           |          | 1998-2008 | Scientific literature |
| HIV/AIDS                                                                      | Keiser O, May M, Sprinz E, Egger M, Anglaret X, ART-LINC, IeDEA. Early loss of HIV-infected patients on potent antiretroviral therapy programmes in lower-income countries. . 2008; 86(7): 559-67.                                                                                                                                                                    |          | 2000-2004 | Scientific literature |
| HIV/AIDS                                                                      | Cazanave C, Veloso VG, Dabis F, Grinsztejn B, Chêne G, IPEC/FIOCRUZ Cohort and the Aquitaine ANRS CO3 Study Group. AIDS and non-AIDS severe morbidity associated with hospitalizations among HIV-infected patients in two regions with universal access to care and antiretroviral therapy, France and Brazil, 2000-2008: hospital-based cohort studies. . 2014; 278. |          | 2000-2008 | Scientific literature |
| HIV/AIDS                                                                      | Ministry of Health (Brazil). Brazil Mortality Information System - Deaths 2013. Rio de Janeiro, Brazil: Ministry of Health (Brazil).                                                                                                                                                                                                                                  | Country  | 2013      | Vital registration    |
| HIV/AIDS                                                                      | Ministry of Health (Brazil). Brazil Mortality Information System - Deaths 1981. Rio de Janeiro, Brazil: Ministry of Health (Brazil).                                                                                                                                                                                                                                  | Country  | 1981      | Vital registration    |
| HIV/AIDS                                                                      | Ministry of Health (Brazil). Brazil Mortality Information System - Deaths 2012. Rio de Janeiro, Brazil: Ministry of Health (Brazil).                                                                                                                                                                                                                                  | Country  | 2012      | Vital registration    |
| HIV/AIDS                                                                      | Ministry of Health (Brazil). Brazil Mortality Information System - Deaths 1982. Rio de Janeiro, Brazil: Ministry of Health (Brazil).                                                                                                                                                                                                                                  | Country  | 1982      | Vital registration    |
| HIV/AIDS                                                                      | Ministry of Health (Brazil). Brazil Mortality Information System - Deaths 2011. Rio de Janeiro, Brazil: Ministry of Health (Brazil).                                                                                                                                                                                                                                  | Country  | 2011      | Vital registration    |
| HIV/AIDS                                                                      | Ministry of Health (Brazil). Brazil Mortality Information System - Deaths 1983. Rio de Janeiro, Brazil: Ministry of Health (Brazil).                                                                                                                                                                                                                                  | Country  | 1983      | Vital registration    |
| HIV/AIDS                                                                      | Ministry of Health (Brazil). Brazil Mortality Information System - Deaths 2010. Rio de Janeiro, Brazil: Ministry of Health (Brazil).                                                                                                                                                                                                                                  | Country  | 2010      | Vital registration    |
| HIV/AIDS                                                                      | Ministry of Health (Brazil). Brazil Mortality Information System - Deaths 1996. Rio de Janeiro, Brazil: Ministry of Health (Brazil).                                                                                                                                                                                                                                  | Country  | 1996      | Vital registration    |
| HIV/AIDS                                                                      | Ministry of Health (Brazil). Brazil Mortality Information System - Deaths 2009. Rio de Janeiro, Brazil: Ministry of Health (Brazil).                                                                                                                                                                                                                                  | Country  | 2009      | Vital registration    |
| HIV/AIDS                                                                      | Ministry of Health (Brazil). Brazil Mortality Information System - Deaths 1985. Rio de Janeiro, Brazil: Ministry of Health (Brazil).                                                                                                                                                                                                                                  | Country  | 1985      | Vital registration    |
| HIV/AIDS                                                                      | Ministry of Health (Brazil). Brazil Mortality Information System - Deaths 1986. Rio de Janeiro, Brazil: Ministry of Health (Brazil).                                                                                                                                                                                                                                  | Country  | 1986      | Vital registration    |
| HIV/AIDS                                                                      | Ministry of Health (Brazil). Brazil Mortality Information System - Deaths 1997. Rio de Janeiro, Brazil: Ministry of Health (Brazil).                                                                                                                                                                                                                                  | Country  | 1997      | Vital registration    |
| Multidrug-resistant HIV/AIDS - Tuberculosis without extensive drug resistance | World Health Organization (WHO). WHO Global Project on Anti-Tuberculosis Drug Resistance Surveillance Data 1988-2015.                                                                                                                                                                                                                                                 | Global   | 2008      | Survey                |
| HIV/AIDS resulting in other diseases                                          | Ministry of Health (Brazil). Brazil Mortality Information System - Deaths 1997. Rio de Janeiro, Brazil: Ministry of Health (Brazil).                                                                                                                                                                                                                                  | Country  | 1997      | Vital registration    |
| HIV/AIDS resulting in other diseases                                          | Ministry of Health (Brazil). Brazil Mortality Information System - Deaths 2008. Rio de Janeiro, Brazil: Ministry of Health (Brazil).                                                                                                                                                                                                                                  | Country  | 2008      | Vital registration    |
| HIV/AIDS resulting in other diseases                                          | Ministry of Health (Brazil). Brazil Mortality Information System - Deaths 1984. Rio de Janeiro, Brazil: Ministry of Health (Brazil).                                                                                                                                                                                                                                  | Country  | 1984      | Vital registration    |
| HIV/AIDS resulting in other diseases                                          | Ministry of Health (Brazil). Brazil Mortality Information System - Deaths 2009. Rio de Janeiro, Brazil: Ministry of Health (Brazil).                                                                                                                                                                                                                                  | Country  | 2009      | Vital registration    |



|                                      |                                                                                                                                                                                                                                                                                                                                                                       |         |           |                       |
|--------------------------------------|-----------------------------------------------------------------------------------------------------------------------------------------------------------------------------------------------------------------------------------------------------------------------------------------------------------------------------------------------------------------------|---------|-----------|-----------------------|
| HIV/AIDS resulting in other diseases | Ministry of Health (Brazil). Brazil Mortality Information System - Deaths 1983. Rio de Janeiro, Brazil: Ministry of Health (Brazil).                                                                                                                                                                                                                                  | Country | 1983      | Vital registration    |
| HIV/AIDS resulting in other diseases | Ministry of Health (Brazil). Brazil Mortality Information System - Deaths 1982. Rio de Janeiro, Brazil: Ministry of Health (Brazil).                                                                                                                                                                                                                                  | Country | 1982      | Vital registration    |
| HIV/AIDS resulting in other diseases | Ministry of Health (Brazil). Brazil Mortality Information System - Deaths 2011. Rio de Janeiro, Brazil: Ministry of Health (Brazil).                                                                                                                                                                                                                                  | Country | 2011      | Vital registration    |
| HIV/AIDS resulting in other diseases | Ministry of Health (Brazil). Brazil Mortality Information System - Deaths 1981. Rio de Janeiro, Brazil: Ministry of Health (Brazil).                                                                                                                                                                                                                                  | Country | 1981      | Vital registration    |
| HIV/AIDS resulting in other diseases | Ministry of Health (Brazil). Brazil Mortality Information System - Deaths 2012. Rio de Janeiro, Brazil: Ministry of Health (Brazil).                                                                                                                                                                                                                                  | Country | 2012      | Vital registration    |
| HIV/AIDS resulting in other diseases | Ministry of Health (Brazil). Brazil Mortality Information System - Deaths 1996. Rio de Janeiro, Brazil: Ministry of Health (Brazil).                                                                                                                                                                                                                                  | Country | 1996      | Vital registration    |
| HIV/AIDS resulting in other diseases | Ministry of Health (Brazil). Brazil Mortality Information System - Deaths 2013. Rio de Janeiro, Brazil: Ministry of Health (Brazil).                                                                                                                                                                                                                                  | Country | 2013      | Vital registration    |
| HIV/AIDS resulting in other diseases | Cazanave C, Veloso VG, Dabis F, Grinsztejn B, Chêne G, IPEC/FIOCRUZ Cohort and the Aquitaine ANRS C03 Study Group. AIDS and non-AIDS severe morbidity associated with hospitalizations among HIV-infected patients in two regions with universal access to care and antiretroviral therapy, France and Brazil, 2000-2008: hospital-based cohort studies. . 2014; 278. |         | 2000-2008 | Scientific literature |
| HIV/AIDS resulting in other diseases | Kaiser O, May M, Sprinz E, Egger M, Anglaret X, ART-LINC, IeDEA. Early loss of HIV-infected patients on potent antiretroviral therapy programmes in lower-income countries. . 2008; 86(7): 559-67.                                                                                                                                                                    |         | 2000-2004 | Scientific literature |
| HIV/AIDS resulting in other diseases | Hunter R, Vasquez-Mora G, Quava-Jones A, Adomakoh N, Peter Figueroa J, Liautaud B, Torres M, Pape JW. Long-term antiretroviral treatment outcomes in seven countries in the Caribbean. . 2012; 59(4): e60-71.                                                                                                                                                         |         | 1998-2008 | Scientific literature |
| HIV/AIDS resulting in other diseases | Tuboi SH, Schechter M, McGowan CC, Cesar C, Krolewiecki A, Cahn P, Wolff M, Pape JW, Padgett D, Madero JS, Gutuzo E, Masys DR, Shepherd BE. Mortality during the first year of potent antiretroviral therapy in HIV-1-infected patients in 7 sites throughout Latin America and the Caribbean. . 2009; 51(5): 615-23.                                                 |         | 1996-2007 | Scientific literature |
| HIV/AIDS resulting in other diseases | Ministry of Health (Brazil). Brazil Mortality Information System - Deaths 2014.                                                                                                                                                                                                                                                                                       | Country | 2014      | Vital registration    |
| HIV/AIDS resulting in other diseases | Carriguiry G, Fink V, Koethe JR, Giganti MJ, Jayathilake K, Blevins M, Cahn P, Grinsztejn B, Wolff M, Pape JW, Padgett D, Madero JS, Gutuzo E, McGowan CC, Shepherd BE. Mortality and loss to follow-up among HIV-infected persons on long-term antiretroviral therapy in Latin America and the Caribbean. . 2015; 18: 20016.                                         |         | 2000-2014 | Scientific literature |
| HIV/AIDS resulting in other diseases | Ministry of Health (Brazil). Brazil Mortality Information System - Deaths 2015.                                                                                                                                                                                                                                                                                       | Country | 2015      | Vital registration    |
| HIV/AIDS resulting in other diseases | Ministry of Health (Brazil). Brazil Mortality Information System - Deaths 1985. Rio de Janeiro, Brazil: Ministry of Health (Brazil).                                                                                                                                                                                                                                  | Country | 1985      | Vital registration    |
| HIV/AIDS resulting in other diseases | Ministry of Health (Brazil). Brazil Mortality Information System - Deaths 2007. Rio de Janeiro, Brazil: Ministry of Health (Brazil).                                                                                                                                                                                                                                  | Country | 2007      | Vital registration    |
| HIV/AIDS resulting in other diseases | Ministry of Health (Brazil). Brazil Mortality Information System - Deaths 2010. Rio de Janeiro, Brazil: Ministry of Health (Brazil).                                                                                                                                                                                                                                  | Country | 2010      | Vital registration    |
| HIV/AIDS resulting in other diseases | Ministry of Health (Brazil). Brazil Mortality Information System - Deaths 2006. Rio de Janeiro, Brazil: Ministry of Health (Brazil).                                                                                                                                                                                                                                  | Country | 2006      | Vital registration    |
| HIV/AIDS resulting in other diseases | Ministry of Health (Brazil). Brazil Mortality Information System - Deaths 1994. Rio de Janeiro, Brazil: Ministry of Health (Brazil).                                                                                                                                                                                                                                  | Country | 1994      | Vital registration    |
| HIV/AIDS resulting in other diseases | Ministry of Health (Brazil). Brazil Mortality Information System - Deaths 1999. Rio de Janeiro, Brazil: Ministry of Health (Brazil).                                                                                                                                                                                                                                  | Country | 1999      | Vital registration    |
| HIV/AIDS resulting in other diseases | Ministry of Health (Brazil). Brazil Mortality Information System - Deaths 1993. Rio de Janeiro, Brazil: Ministry of Health (Brazil).                                                                                                                                                                                                                                  | Country | 1993      | Vital registration    |
| HIV/AIDS resulting in other diseases | Ministry of Health (Brazil). Brazil Mortality Information System - Deaths 1986. Rio de Janeiro, Brazil: Ministry of Health (Brazil).                                                                                                                                                                                                                                  | Country | 1986      | Vital registration    |
| HIV/AIDS resulting in other diseases | Ministry of Health (Brazil). Brazil Mortality Information System - Deaths 2000. Rio de Janeiro, Brazil: Ministry of Health (Brazil).                                                                                                                                                                                                                                  | Country | 2000      | Vital registration    |
| HIV/AIDS resulting in other diseases | Ministry of Health (Brazil). Brazil Mortality Information System - Deaths 1992. Rio de Janeiro, Brazil: Ministry of Health (Brazil).                                                                                                                                                                                                                                  | Country | 1992      | Vital registration    |
| HIV/AIDS resulting in other diseases | Ministry of Health (Brazil). Brazil Mortality Information System - Deaths 1995. Rio de Janeiro, Brazil: Ministry of Health (Brazil).                                                                                                                                                                                                                                  | Country | 1995      | Vital registration    |
| HIV/AIDS resulting in other diseases | Ministry of Health (Brazil). Brazil Mortality Information System - Deaths 1991. Rio de Janeiro, Brazil: Ministry of Health (Brazil).                                                                                                                                                                                                                                  | Country | 1991      | Vital registration    |
| HIV/AIDS resulting in other diseases | Ministry of Health (Brazil). Brazil Mortality Information System - Deaths 2001. Rio de Janeiro, Brazil: Ministry of Health (Brazil).                                                                                                                                                                                                                                  | Country | 2001      | Vital registration    |
| HIV/AIDS resulting in other diseases | Ministry of Health (Brazil). Brazil Mortality Information System - Deaths 1990. Rio de Janeiro, Brazil: Ministry of Health (Brazil).                                                                                                                                                                                                                                  | Country | 1990      | Vital registration    |
| HIV/AIDS resulting in other diseases | Ministry of Health (Brazil). Brazil Mortality Information System - Deaths 2003. Rio de Janeiro, Brazil: Ministry of Health (Brazil).                                                                                                                                                                                                                                  | Country | 2003      | Vital registration    |
| HIV/AIDS resulting in other diseases | Ministry of Health (Brazil). Brazil Mortality Information System - Deaths 1989. Rio de Janeiro, Brazil: Ministry of Health (Brazil).                                                                                                                                                                                                                                  | Country | 1989      | Vital registration    |
| HIV/AIDS resulting in other diseases | Ministry of Health (Brazil). Brazil Mortality Information System - Deaths 2004. Rio de Janeiro, Brazil: Ministry of Health (Brazil).                                                                                                                                                                                                                                  | Country | 2004      | Vital registration    |
| HIV/AIDS resulting in other diseases | Ministry of Health (Brazil). Brazil Mortality Information System - Deaths 1988. Rio de Janeiro, Brazil: Ministry of Health (Brazil).                                                                                                                                                                                                                                  | Country | 1988      | Vital registration    |
| HIV/AIDS resulting in other diseases | Ministry of Health (Brazil). Brazil Mortality Information System - Deaths 2005. Rio de Janeiro, Brazil: Ministry of Health (Brazil).                                                                                                                                                                                                                                  | Country | 2005      | Vital registration    |
| HIV/AIDS resulting in other diseases | Ministry of Health (Brazil). Brazil Mortality Information System - Deaths 1987. Rio de Janeiro, Brazil: Ministry of Health (Brazil).                                                                                                                                                                                                                                  | Country | 1987      | Vital registration    |
| HIV/AIDS resulting in other diseases | Ministry of Health (Brazil). Brazil Mortality Information System - Deaths 2002. Rio de Janeiro, Brazil: Ministry of Health (Brazil).                                                                                                                                                                                                                                  | Country | 2002      | Vital registration    |
| HIV/AIDS resulting in other diseases | Ministry of Health (Brazil). Brazil Mortality Information System - Deaths 1998. Rio de Janeiro, Brazil: Ministry of Health (Brazil).                                                                                                                                                                                                                                  | Country | 1998      | Vital registration    |
| Diarrheal diseases                   | Volotão EM, Soares CC, Maranhão AG, Rocha LN, Hoshino Y, Santos N. Rotavirus surveillance in the city of Rio de Janeiro-Brazil during 2000-2004: detection of unusual strains with G8P4 or G10P9 specificities. . 2006; 78(2): 263-72.                                                                                                                                |         | 2000-2004 | Scientific literature |
| Diarrheal diseases                   | Volotão EM, Soares CC, Maranhão AG, Rocha LN, Hoshino Y, Santos N. Rotavirus surveillance in the city of Rio de Janeiro-Brazil during 2000-2004: detection of unusual strains with G8P4 or G10P9 specificities. . 2006; 78(2): 263-72.                                                                                                                                |         | 2000-2004 | Scientific literature |
| Diarrheal diseases                   | Sobel J, Gomes TAT, Ramos RTS, Hoekstra M, Rodrigue D, Rassi V, Griffin PM. Pathogen-specific risk factors and protective factors for acute diarrheal illness in children aged 12-59 months in São Paulo, Brazil. . 2004; 38(11): 1545-51.                                                                                                                            |         | 1989-1990 | Scientific literature |
| Diarrheal diseases                   | Soares CC, Volotão EM, Albuquerque MCM, da Silva FM, de Carvalho TRB, Nozawa CM, Linhares RE, Santos N. Prevalence of enteric adenoviruses among children with diarrhea in four Brazilian cities. . 2002; 23(3): 171-7.                                                                                                                                               |         | 1998-2000 | Scientific literature |
| Diarrheal diseases                   | Soares CC, Volotão EM, Albuquerque MCM, da Silva FM, de Carvalho TRB, Nozawa CM, Linhares RE, Santos N. Prevalence of enteric adenoviruses among children with diarrhea in four Brazilian cities. . 2002; 23(3): 171-7.                                                                                                                                               |         | 1998-2000 | Scientific literature |
| Diarrheal diseases                   | Rosa E Silva ML, Pires De Carvalho I, Gouvea V. 1998-1999 rotavirus seasons in Juiz de Fora, Minas Gerais, Brazil: detection of an unusual G3P4 epidemic strain. . 2002; 40(8): 2837-42.                                                                                                                                                                              |         | 1998-1999 | Scientific literature |
| Diarrheal diseases                   | Santos N, Volotão EM, Soares CC, Campos GS, Sardi SI, Hoshino Y. Predominance of rotavirus genotype G9 during the 1999, 2000, and 2002 seasons among hospitalized children in the city of Salvador, Bahia, Brazil: implications for future vaccine strategies. . 2005; 43(8): 4064-9.                                                                                 |         | 1999-2002 | Scientific literature |
| Diarrheal diseases                   | Santos N, Volotão EM, Soares CC, Campos GS, Sardi SI, Hoshino Y. Predominance of rotavirus genotype G9 during the 1999, 2000, and 2002 seasons among hospitalized children in the city of Salvador, Bahia, Brazil: implications for future vaccine strategies. . 2005; 43(8): 4064-9.                                                                                 |         | 1999-2002 | Scientific literature |
| Diarrheal diseases                   | Rosa E Silva ML, Pires De Carvalho I, Gouvea V. 1998-1999 rotavirus seasons in Juiz de Fora, Minas Gerais, Brazil: detection of an unusual G3P4 epidemic strain. . 2002; 40(8): 2837-42.                                                                                                                                                                              |         | 1998-1999 | Scientific literature |
| Diarrheal diseases                   | Cardoso D das D de P, Soares CMA, Dias e Souza MB de L, de Azevedo M da SP, Martins RMB, Queiróz DA de O, de Brito WMED, Munford V, Rácz ML. Epidemiological features of rotavirus infection in Goiânia, Goiás, Brazil, from 1986 to 2000. . 2003; 98(1): 25-9.                                                                                                       |         | 1986-2000 | Scientific literature |
| Diarrheal diseases                   | Cardoso D das D de P, Soares CMA, Dias e Souza MB de L, de Azevedo M da SP, Martins RMB, Queiróz DA de O, de Brito WMED, Munford V, Rácz ML. Epidemiological features of rotavirus infection in Goiânia, Goiás, Brazil, from 1986 to 2000. . 2003; 98(1): 25-9.                                                                                                       |         | 1986-2000 | Scientific literature |
| Diarrheal diseases                   | Sobel J, Gomes TAT, Ramos RTS, Hoekstra M, Rodrigue D, Rassi V, Griffin PM. Pathogen-specific risk factors and protective factors for acute diarrheal illness in children aged 12-59 months in São Paulo, Brazil. . 2004; 38(11): 1545-51.                                                                                                                            |         | 1989-1990 | Scientific literature |
| Diarrheal diseases                   | Soares CC, Volotão EM, Albuquerque MCM, da Silva FM, de Carvalho TRB, Nozawa CM, Linhares RE, Santos N. Prevalence of enteric adenoviruses among children with diarrhea in four Brazilian cities. . 2002; 23(3): 171-7.                                                                                                                                               |         | 1998-2000 | Scientific literature |

|                    |                                                                                                                                                                                                                                                                                                                                          |         |           |                       |
|--------------------|------------------------------------------------------------------------------------------------------------------------------------------------------------------------------------------------------------------------------------------------------------------------------------------------------------------------------------------|---------|-----------|-----------------------|
| Diarrheal diseases | Sobel J, Gomes TAT, Ramos RTS, Hoekstra M, Rodrigue D, Rassi V, Griffin PM. Pathogen-specific risk factors and protective factors for acute diarrheal illness in children aged 12-59 months in São Paulo, Brazil. . 2004; 38(11): 1545-51.                                                                                               |         | 1989-1990 | Scientific literature |
| Diarrheal diseases | Guerrant RL, Kirchhoff LV, Shields DS, Nations MK, Leslie J, de Sousa MA, Araujo JG, Correia LL, Sauer KT, McClelland KE. Prospective study of diarrheal illnesses in northeastern Brazil: patterns of disease, nutritional impact, etiologies, and risk factors. . 1983; 148(6): 986-97.                                                |         | 1978-1980 | Scientific literature |
| Diarrheal diseases | Sobel J, Gomes TAT, Ramos RTS, Hoekstra M, Rodrigue D, Rassi V, Griffin PM. Pathogen-specific risk factors and protective factors for acute diarrheal illness in children aged 12-59 months in São Paulo, Brazil. . 2004; 38(11): 1545-51.                                                                                               |         | 1989-1990 | Scientific literature |
| Diarrheal diseases | Sobel J, Gomes TAT, Ramos RTS, Hoekstra M, Rodrigue D, Rassi V, Griffin PM. Pathogen-specific risk factors and protective factors for acute diarrheal illness in children aged 12-59 months in São Paulo, Brazil. . 2004; 38(11): 1545-51.                                                                                               |         | 1989-1990 | Scientific literature |
| Diarrheal diseases | Sobel J, Gomes TAT, Ramos RTS, Hoekstra M, Rodrigue D, Rassi V, Griffin PM. Pathogen-specific risk factors and protective factors for acute diarrheal illness in children aged 12-59 months in São Paulo, Brazil. . 2004; 38(11): 1545-51.                                                                                               |         | 1989-1990 | Scientific literature |
| Diarrheal diseases | Munford V, Gillo AE, de Souza EC, Cardoso DM, Cardoso D das D de P, Borges AMT, Costa PSS da, Melgaço IAM, Rosa H, Carvalho PRA, Goldani MZ, Moreira ED Jr, Santana C, El Khoury A, Ikedo F, Rácz ML. Rotavirus gastroenteritis in children in 4 regions in Brazil: a hospital-based surveillance study. . 2009; 200(Suppl 1): S106-113. |         | 2005-2006 | Scientific literature |
| Diarrheal diseases | Munford V, Gillo AE, de Souza EC, Cardoso DM, Cardoso D das D de P, Borges AMT, Costa PSS da, Melgaço IAM, Rosa H, Carvalho PRA, Goldani MZ, Moreira ED Jr, Santana C, El Khoury A, Ikedo F, Rácz ML. Rotavirus gastroenteritis in children in 4 regions in Brazil: a hospital-based surveillance study. . 2009; 200(Suppl 1): S106-113. |         | 2005-2006 | Scientific literature |
| Diarrheal diseases | Stewien KE, da Cunha LC, Alvim A de C, dos Reis Filho SA, Alvim MA, Brandão AA, Neiva MN. Rotavirus associated diarrhoea during infancy in the city of S. Luís (MA), Brazil: a two-year longitudinal study. . 1991; 33(6): 459-64.                                                                                                       |         | 1986-1988 | Scientific literature |
| Diarrheal diseases | Stewien KE, da Cunha LC, Alvim A de C, dos Reis Filho SA, Alvim MA, Brandão AA, Neiva MN. Rotavirus associated diarrhoea during infancy in the city of S. Luís (MA), Brazil: a two-year longitudinal study. . 1991; 33(6): 459-64.                                                                                                       |         | 1986-1988 | Scientific literature |
| Diarrheal diseases | CHOICE Study Group. Multicenter, randomized, double-blind clinical trial to evaluate the efficacy and safety of a reduced osmolarity oral rehydration salts solution in children with acute watery diarrhea. . 2001; 107(4): 613-8.                                                                                                      |         | 1995-1997 | Scientific literature |
| Diarrheal diseases | CHOICE Study Group. Multicenter, randomized, double-blind clinical trial to evaluate the efficacy and safety of a reduced osmolarity oral rehydration salts solution in children with acute watery diarrhea. . 2001; 107(4): 613-8.                                                                                                      |         | 1995-1997 | Scientific literature |
| Diarrheal diseases | Coiro JR, Bendati MM, de Almeida Neto AJ, Heuser CF, Vasconcelos VL. Rotavirus infection in Brazilian children with acute enteritis: a seasonal variation study. . 1983; 32(5): 1186-8.                                                                                                                                                  | Country | 1981-1982 | Scientific literature |
| Diarrheal diseases | Coiro JR, Bendati MM, de Almeida Neto AJ, Heuser CF, Vasconcelos VL. Rotavirus infection in Brazilian children with acute enteritis: a seasonal variation study. . 1983; 32(5): 1186-8.                                                                                                                                                  | Country | 1981-1982 | Scientific literature |
| Diarrheal diseases | Luz CRNE da, Mascarenhas JDP, Gabbay YB, Motta ARB, Lima TVR, Soares L da S, Linhares AC. Rotavirus serotypes and electrophoretotypes identified among hospitalised children in São Luís, Maranhão, Brazil. . 2005; 47(5): 287-93.                                                                                                       |         | 1997-1999 | Scientific literature |
| Diarrheal diseases | Guerrant RL, Kirchhoff LV, Shields DS, Nations MK, Leslie J, de Sousa MA, Araujo JG, Correia LL, Sauer KT, McClelland KE. Prospective study of diarrheal illnesses in northeastern Brazil: patterns of disease, nutritional impact, etiologies, and risk factors. . 1983; 148(6): 986-97.                                                |         | 1978-1980 | Scientific literature |
| Diarrheal diseases | Sobel J, Gomes TAT, Ramos RTS, Hoekstra M, Rodrigue D, Rassi V, Griffin PM. Pathogen-specific risk factors and protective factors for acute diarrheal illness in children aged 12-59 months in São Paulo, Brazil. . 2004; 38(11): 1545-51.                                                                                               |         | 1989-1990 | Scientific literature |
| Diarrheal diseases | Luz CRNE da, Mascarenhas JDP, Gabbay YB, Motta ARB, Lima TVR, Soares L da S, Linhares AC. Rotavirus serotypes and electrophoretotypes identified among hospitalised children in São Luís, Maranhão, Brazil. . 2005; 47(5): 287-93.                                                                                                       |         | 1997-1999 | Scientific literature |
| Diarrheal diseases | Araújo IT, Fialho AM, de Assis RMS, Rocha M, Galvão M, Cruz CM, Ferreira MSR, Leite JPG. Rotavirus strain diversity in Rio de Janeiro, Brazil: characterization of VP4 and VP7 genotypes in hospitalized children. . 2002; 48(4): 214-8.                                                                                                 |         | 1996-1999 | Scientific literature |
| Diarrheal diseases | Lima AA, Guerrant RL. Persistent diarrhea in children: epidemiology, risk factors, pathophysiology, nutritional impact, and management. . 1992; 14: 222-42.                                                                                                                                                                              |         | 1989-1991 | Scientific literature |
| Diarrheal diseases | Fang GD, Lima AA, Martins CV, Nataro JP, Guerrant RL. Etiology and epidemiology of persistent diarrhea in northeastern Brazil: a hospital-based, prospective, case-control study. . 1995; 21(2): 137-44.                                                                                                                                 |         | 1988-1991 | Scientific literature |
| Diarrheal diseases | Fang GD, Lima AA, Martins CV, Nataro JP, Guerrant RL. Etiology and epidemiology of persistent diarrhea in northeastern Brazil: a hospital-based, prospective, case-control study. . 1995; 21(2): 137-44.                                                                                                                                 |         | 1988-1991 | Scientific literature |
| Diarrheal diseases | Fang GD, Lima AA, Martins CV, Nataro JP, Guerrant RL. Etiology and epidemiology of persistent diarrhea in northeastern Brazil: a hospital-based, prospective, case-control study. . 1995; 21(2): 137-44.                                                                                                                                 |         | 1988-1991 | Scientific literature |
| Diarrheal diseases | Fang GD, Lima AA, Martins CV, Nataro JP, Guerrant RL. Etiology and epidemiology of persistent diarrhea in northeastern Brazil: a hospital-based, prospective, case-control study. . 1995; 21(2): 137-44.                                                                                                                                 |         | 1988-1991 | Scientific literature |
| Diarrheal diseases | Gusmão RH, Mascarenhas JD, Gabbay YB, Lins-Lainson Z, Ramos FL, Monteiro TA, Valente SA, Fagundes-Neto U, Linhares AC. Rotavirus subgroups, G serotypes, and electrophoretotypes in cases of nosocomial infantile diarrhoea in Belém, Brazil. . 1999; 45(2): 81-6.                                                                       |         | 1992-1994 | Scientific literature |
| Diarrheal diseases | Gusmão RH, Mascarenhas JD, Gabbay YB, Lins-Lainson Z, Ramos FL, Monteiro TA, Valente SA, Fagundes-Neto U, Linhares AC. Rotavirus subgroups, G serotypes, and electrophoretotypes in cases of nosocomial infantile diarrhoea in Belém, Brazil. . 1999; 45(2): 81-6.                                                                       |         | 1992-1994 | Scientific literature |
| Diarrheal diseases | Gusmão RH, Mascarenhas JD, Gabbay YB, Lins-Lainson Z, Ramos FL, Monteiro TA, Valente SA, Fagundes-Neto U, Linhares AC. Rotavirus subgroups, G serotypes, and electrophoretotypes in cases of nosocomial infantile diarrhoea in Belém, Brazil. . 1999; 45(2): 81-6.                                                                       |         | 1992-1994 | Scientific literature |
| Diarrheal diseases | Gusmão RH, Mascarenhas JD, Gabbay YB, Lins-Lainson Z, Ramos FL, Monteiro TA, Valente SA, Fagundes-Neto U, Linhares AC. Rotavirus subgroups, G serotypes, and electrophoretotypes in cases of nosocomial infantile diarrhoea in Belém, Brazil. . 1999; 45(2): 81-6.                                                                       |         | 1992-1994 | Scientific literature |
| Diarrheal diseases | Gusmão RH, Mascarenhas JD, Gabbay YB, Lins-Lainson Z, Ramos FL, Monteiro TA, Valente SA, Fagundes-Neto U, Linhares AC. Rotavirus subgroups, G serotypes, and electrophoretotypes in cases of nosocomial infantile diarrhoea in Belém, Brazil. . 1999; 45(2): 81-6.                                                                       |         | 1992-1994 | Scientific literature |
| Diarrheal diseases | Gusmão RH, Mascarenhas JD, Gabbay YB, Lins-Lainson Z, Ramos FL, Monteiro TA, Valente SA, Fagundes-Neto U, Linhares AC. Rotavirus subgroups, G serotypes, and electrophoretotypes in cases of nosocomial infantile diarrhoea in Belém, Brazil. . 1999; 45(2): 81-6.                                                                       |         | 1992-1994 | Scientific literature |
| Diarrheal diseases | Gusmão RH, Mascarenhas JD, Gabbay YB, Lins-Lainson Z, Ramos FL, Monteiro TA, Valente SA, Fagundes-Neto U, Linhares AC. Rotavirus subgroups, G serotypes, and electrophoretotypes in cases of nosocomial infantile diarrhoea in Belém, Brazil. . 1999; 45(2): 81-6.                                                                       |         | 1992-1994 | Scientific literature |
| Diarrheal diseases | Araújo IT, Fialho AM, de Assis RMS, Rocha M, Galvão M, Cruz CM, Ferreira MSR, Leite JPG. Rotavirus strain diversity in Rio de Janeiro, Brazil: characterization of VP4 and VP7 genotypes in hospitalized children. . 2002; 48(4): 214-8.                                                                                                 |         | 1996-1999 | Scientific literature |
| Diarrheal diseases | Guerrant RL, Kirchhoff LV, Shields DS, Nations MK, Leslie J, de Sousa MA, Araujo JG, Correia LL, Sauer KT, McClelland KE. Prospective study of diarrheal illnesses in northeastern Brazil: patterns of disease, nutritional impact, etiologies, and risk factors. . 1983; 148(6): 986-97.                                                |         | 1978-1980 | Scientific literature |
| Diarrheal diseases | Bittencourt JA, Arbo E, Malyz AS, Oravek R, Dias C. Seasonal and age distribution of rotavirus infection in Porto Alegre--Brazil. . 2000; 4(6): 279-83.                                                                                                                                                                                  |         | 1996-1998 | Scientific literature |
| Diarrheal diseases | Lima AA, Guerrant RL. Persistent diarrhea in children: epidemiology, risk factors, pathophysiology, nutritional impact, and management. . 1992; 14: 222-42.                                                                                                                                                                              |         | 1989-1991 | Scientific literature |
| Diarrheal diseases | Bittencourt JA, Arbo E, Malyz AS, Oravek R, Dias C. Seasonal and age distribution of rotavirus infection in Porto Alegre--Brazil. . 2000; 4(6): 279-83.                                                                                                                                                                                  |         | 1996-1998 | Scientific literature |
| Diarrheal diseases | Carmona RCC, Timenetsky M do CST, da Silva FF, Granato CFH. Characterization of rotavirus strains from hospitalized and outpatient children with acute diarrhoea in São Paulo, Brazil. . 2004; 74(1): 166-72.                                                                                                                            |         | 1994-1995 | Scientific literature |
| Diarrheal diseases | Carmona RCC, Timenetsky M do CST, da Silva FF, Granato CFH. Characterization of rotavirus strains from hospitalized and outpatient children with acute diarrhoea in São Paulo, Brazil. . 2004; 74(1): 166-72.                                                                                                                            |         | 1994-1995 | Scientific literature |
| Diarrheal diseases | Carmona RCC, Timenetsky M do CST, da Silva FF, Granato CFH. Characterization of rotavirus strains from hospitalized and outpatient children with acute diarrhoea in São Paulo, Brazil. . 2004; 74(1): 166-72.                                                                                                                            |         | 1994-1995 | Scientific literature |
| Diarrheal diseases | Carmona RCC, Timenetsky M do CST, da Silva FF, Granato CFH. Characterization of rotavirus strains from hospitalized and outpatient children with acute diarrhoea in São Paulo, Brazil. . 2004; 74(1): 166-72.                                                                                                                            |         | 1994-1995 | Scientific literature |

|                    |                                                                                                                                                                                                                                                                                                |       |  |           |                       |
|--------------------|------------------------------------------------------------------------------------------------------------------------------------------------------------------------------------------------------------------------------------------------------------------------------------------------|-------|--|-----------|-----------------------|
| Diarrheal diseases | Carmona RCC, Timenetsky M do CST, da Silva FF, Granato CFH. Characterization of rotavirus strains from hospitalized and outpatient children with acute diarrhoea in São Paulo, Brazil. . 2004; 74(1): 166-72.                                                                                  |       |  | 1994-1995 | Scientific literature |
| Diarrheal diseases | Carmona RCC, Timenetsky M do CST, da Silva FF, Granato CFH. Characterization of rotavirus strains from hospitalized and outpatient children with acute diarrhoea in São Paulo, Brazil. . 2004; 74(1): 166-72.                                                                                  |       |  | 1994-1995 | Scientific literature |
| Diarrheal diseases | Carmona RCC, Timenetsky M do CST, da Silva FF, Granato CFH. Characterization of rotavirus strains from hospitalized and outpatient children with acute diarrhoea in São Paulo, Brazil. . 2004; 74(1): 166-72.                                                                                  |       |  | 1994-1995 | Scientific literature |
| Diarrheal diseases | Carmona RCC, Timenetsky M do CST, da Silva FF, Granato CFH. Characterization of rotavirus strains from hospitalized and outpatient children with acute diarrhoea in São Paulo, Brazil. . 2004; 74(1): 166-72.                                                                                  |       |  | 1994-1995 | Scientific literature |
| Diarrheal diseases | Da Silva Domingues AL, da Silva Vaz MG, Moreno M, Câmara FP. Molecular epidemiology of group A rotavirus causing acute diarrhea in infants and young children hospitalized in Rio de Janeiro, Brazil. 1995-1996. . 2000; 4(3): 119-25.                                                         |       |  | 1995-1996 | Scientific literature |
| Diarrheal diseases | Da Silva Domingues AL, da Silva Vaz MG, Moreno M, Câmara FP. Molecular epidemiology of group A rotavirus causing acute diarrhea in infants and young children hospitalized in Rio de Janeiro, Brazil. 1995-1996. . 2000; 4(3): 119-25.                                                         |       |  | 1995-1996 | Scientific literature |
| Diarrheal diseases | Fernandes JV, Fonseca SM, Azevedo JC, Maranhão H de S, Fonseca MH, Dantas MT, Meissner R de V. Rotavirus detection in feces of children with acute diarrhea. . 2000; 76(4): 300-4.                                                                                                             |       |  | 1996-1998 | Scientific literature |
| Diarrheal diseases | Fernandes JV, Fonseca SM, Azevedo JC, Maranhão H de S, Fonseca MH, Dantas MT, Meissner R de V. Rotavirus detection in feces of children with acute diarrhea. . 2000; 76(4): 300-4.                                                                                                             |       |  | 1996-1998 | Scientific literature |
| Diarrheal diseases | Lima AA, Guerrant RL. Persistent diarrhea in children: epidemiology, risk factors, pathophysiology, nutritional impact, and management. . 1992; 14: 222-42.                                                                                                                                    |       |  | 1989-1991 | Scientific literature |
| Diarrheal diseases | Carmona RCC, Timenetsky M do CST, da Silva FF, Granato CFH. Characterization of rotavirus strains from hospitalized and outpatient children with acute diarrhoea in São Paulo, Brazil. . 2004; 74(1): 166-72.                                                                                  |       |  | 1994-1995 | Scientific literature |
| Diarrheal diseases | Guerrant RL, Kirchhoff LV, Shields DS, Nations MK, Leslie J, de Sousa MA, Araujo JG, Correia LL, Sauer KT, McClelland KE. Prospective study of diarrheal illnesses in northeastern Brazil: patterns of disease, nutritional impact, etiologies, and risk factors. . 1983; 148(6): 986-97.      |       |  | 1978-1980 | Scientific literature |
| Diarrheal diseases | Sartori AMC, Valentim J, de Soárez PC, Novaes HMD. Rotavirus morbidity and mortality in children in Brazil. . 2008; 23(2): 92-100.                                                                                                                                                             |       |  | 1986-2006 | Scientific literature |
| Diarrheal diseases | Guerrant RL, Kirchhoff LV, Shields DS, Nations MK, Leslie J, de Sousa MA, Araujo JG, Correia LL, Sauer KT, McClelland KE. Prospective study of diarrheal illnesses in northeastern Brazil: patterns of disease, nutritional impact, etiologies, and risk factors. . 1983; 148(6): 986-97.      |       |  | 1978-1980 | Scientific literature |
| Diarrheal diseases | Lozer DM, Souza TB, Monfardini MV, Vicentini F, Kitagawa SS, Scaletsky IC, Spano LC. Genotypic and phenotypic analysis of diarrheagenic Escherichia coli strains isolated from Brazilian children living in low socioeconomic level communities. . 2013; 418.                                  |       |  | 2007-2008 | Scientific literature |
| Diarrheal diseases | Lozer DM, Souza TB, Monfardini MV, Vicentini F, Kitagawa SS, Scaletsky IC, Spano LC. Genotypic and phenotypic analysis of diarrheagenic Escherichia coli strains isolated from Brazilian children living in low socioeconomic level communities. . 2013; 418.                                  |       |  | 2007-2008 | Scientific literature |
| Diarrheal diseases | Lozer DM, Souza TB, Monfardini MV, Vicentini F, Kitagawa SS, Scaletsky IC, Spano LC. Genotypic and phenotypic analysis of diarrheagenic Escherichia coli strains isolated from Brazilian children living in low socioeconomic level communities. . 2013; 418.                                  |       |  | 2007-2008 | Scientific literature |
| Diarrheal diseases | Lozer DM, Souza TB, Monfardini MV, Vicentini F, Kitagawa SS, Scaletsky IC, Spano LC. Genotypic and phenotypic analysis of diarrheagenic Escherichia coli strains isolated from Brazilian children living in low socioeconomic level communities. . 2013; 418.                                  |       |  | 2007-2008 | Scientific literature |
| Diarrheal diseases | Ministry of Health (Brazil). Brazil Hospital Information System 1998-2002.                                                                                                                                                                                                                     |       |  | 1998-2002 | Administrative record |
| Diarrheal diseases | Ministry of Health (Brazil). Brazil Hospital Information System 2003-2007.                                                                                                                                                                                                                     |       |  | 2003-2007 | Administrative record |
| Diarrheal diseases | Ministry of Health (Brazil). Brazil Hospital Information System 2008-2012.                                                                                                                                                                                                                     |       |  | 2008-2012 | Administrative record |
| Diarrheal diseases | Ministry of Health (Brazil). Brazil Hospital Information System 2013-2014.                                                                                                                                                                                                                     |       |  | 2013-2017 | Administrative record |
| Diarrheal diseases | Boccolini CS, Boccolini P de MM, de Carvalho ML, de Oliveira MIC. [Exclusive breastfeeding and diarrhea hospitalization patterns between 1999 and 2008 in Brazilian State Capitals]. . 2012; 17(7): 1857-63.                                                                                   |       |  | 1999-2008 | Scientific literature |
| Diarrheal diseases | Luchs A, Cilli A, Morillo SG, de Cassia Compagnoli Carmona R, do Carmo Sampaio Tavares Timenetsky M. Rotavirus in adults, Brazil, 2004-2011: G2P[4] dominance and potential impact on vaccination. . 2014; 18(1): 538.                                                                         |       |  | 2004-2011 | Scientific literature |
| Diarrheal diseases | Luchs A, Cilli A, Morillo SG, de Cassia Compagnoli Carmona R, do Carmo Sampaio Tavares Timenetsky M. Rotavirus in adults, Brazil, 2004-2011: G2P[4] dominance and potential impact on vaccination. . 2014; 18(1): 538.                                                                         |       |  | 2004-2011 | Scientific literature |
| Diarrheal diseases | Fogarty International Center, National Institutes of Health (NIH), Foundation for the National Institutes of Health (FNIH), National Institute of Science, Technology, and Biomedicine of Semi-Arid Brazil (INCT-IBISAB). Brazil - Fortaleza Malnutrition and Enteric Disease Study 2009-2014. | Ceará |  | 2009-2014 | Survey                |
| Diarrheal diseases | Fogarty International Center, National Institutes of Health (NIH), Foundation for the National Institutes of Health (FNIH), National Institute of Science, Technology, and Biomedicine of Semi-Arid Brazil (INCT-IBISAB). Brazil - Fortaleza Malnutrition and Enteric Disease Study 2009-2014. | Ceará |  | 2009-2014 | Survey                |
| Diarrheal diseases | Lozer DM, Souza TB, Monfardini MV, Vicentini F, Kitagawa SS, Scaletsky IC, Spano LC. Genotypic and phenotypic analysis of diarrheagenic Escherichia coli strains isolated from Brazilian children living in low socioeconomic level communities. . 2013; 418.                                  |       |  | 2007-2008 | Scientific literature |
| Diarrheal diseases | Fogarty International Center, National Institutes of Health (NIH), Foundation for the National Institutes of Health (FNIH), National Institute of Science, Technology, and Biomedicine of Semi-Arid Brazil (INCT-IBISAB). Brazil - Fortaleza Malnutrition and Enteric Disease Study 2009-2014. | Ceará |  | 2009-2014 | Survey                |
| Diarrheal diseases | Fogarty International Center, National Institutes of Health (NIH), Foundation for the National Institutes of Health (FNIH), National Institute of Science, Technology, and Biomedicine of Semi-Arid Brazil (INCT-IBISAB). Brazil - Fortaleza Malnutrition and Enteric Disease Study 2009-2014. | Ceará |  | 2009-2014 | Survey                |
| Diarrheal diseases | Fogarty International Center, National Institutes of Health (NIH), Foundation for the National Institutes of Health (FNIH), National Institute of Science, Technology, and Biomedicine of Semi-Arid Brazil (INCT-IBISAB). Brazil - Fortaleza Malnutrition and Enteric Disease Study 2009-2014. | Ceará |  | 2009-2014 | Survey                |
| Diarrheal diseases | Fogarty International Center, National Institutes of Health (NIH), Foundation for the National Institutes of Health (FNIH), National Institute of Science, Technology, and Biomedicine of Semi-Arid Brazil (INCT-IBISAB). Brazil - Fortaleza Malnutrition and Enteric Disease Study 2009-2014. | Ceará |  | 2009-2014 | Survey                |
| Diarrheal diseases | Fogarty International Center, National Institutes of Health (NIH), Foundation for the National Institutes of Health (FNIH), National Institute of Science, Technology, and Biomedicine of Semi-Arid Brazil (INCT-IBISAB). Brazil - Fortaleza Malnutrition and Enteric Disease Study 2009-2014. | Ceará |  | 2009-2014 | Survey                |
| Diarrheal diseases | Fogarty International Center, National Institutes of Health (NIH), Foundation for the National Institutes of Health (FNIH), National Institute of Science, Technology, and Biomedicine of Semi-Arid Brazil (INCT-IBISAB). Brazil - Fortaleza Malnutrition and Enteric Disease Study 2009-2014. | Ceará |  | 2009-2014 | Survey                |
| Diarrheal diseases | Fogarty International Center, National Institutes of Health (NIH), Foundation for the National Institutes of Health (FNIH), National Institute of Science, Technology, and Biomedicine of Semi-Arid Brazil (INCT-IBISAB). Brazil - Fortaleza Malnutrition and Enteric Disease Study 2009-2014. | Ceará |  | 2009-2014 | Survey                |
| Diarrheal diseases | Fogarty International Center, National Institutes of Health (NIH), Foundation for the National Institutes of Health (FNIH), National Institute of Science, Technology, and Biomedicine of Semi-Arid Brazil (INCT-IBISAB). Brazil - Fortaleza Malnutrition and Enteric Disease Study 2009-2014. | Ceará |  | 2009-2014 | Survey                |
| Diarrheal diseases | Fogarty International Center, National Institutes of Health (NIH), Foundation for the National Institutes of Health (FNIH), National Institute of Science, Technology, and Biomedicine of Semi-Arid Brazil (INCT-IBISAB). Brazil - Fortaleza Malnutrition and Enteric Disease Study 2009-2014. | Ceará |  | 2009-2014 | Survey                |
| Diarrheal diseases | admission of Brazilian children with non-rotavirus diarrhoea: a case control-study. . 2015; 109(7): 454-61.                                                                                                                                                                                    |       |  | 2008-2011 | Scientific literature |
| Diarrheal diseases | admission of Brazilian children with non-rotavirus diarrhoea: a case control-study. . 2015; 109(7): 454-61.                                                                                                                                                                                    |       |  | 2008-2011 | Scientific literature |
| Diarrheal diseases | The prevalence of norovirus, astrovirus and adenovirus infections among hospitalised children with acute gastroenteritis in Porto Velho, state of Rondonia, western Brazilian Amazon. . 2015; 110(2): 215-21.                                                                                  |       |  | 2010-2012 | Scientific literature |
| Diarrheal diseases | The prevalence of norovirus, astrovirus and adenovirus infections among hospitalised children with acute gastroenteritis in Porto Velho, state of Rondonia, western Brazilian Amazon. . 2015; 110(2): 215-21.                                                                                  |       |  | 2010-2012 | Scientific literature |

|                    |                                                                                                                                                                                                                                                                                                                                                  |           |           |                       |
|--------------------|--------------------------------------------------------------------------------------------------------------------------------------------------------------------------------------------------------------------------------------------------------------------------------------------------------------------------------------------------|-----------|-----------|-----------------------|
| Diarrheal diseases | The prevalence of norovirus, astrovirus and adenovirus infections among hospitalised children with acute gastroenteritis in Porto Velho, state of Rondonia, western Brazilian Amazon. . 2015; 110(2): 215-21.                                                                                                                                    |           | 2010-2012 | Scientific literature |
| Diarrheal diseases | Fogarty International Center, National Institutes of Health (NIH), Foundation for the National Institutes of Health (FNIH), National Institute of Science, Technology, and Biomedicine of Semi-Arid Brazil (INCT-IBISAB), Brazil - Fortaleza Malnutrition and Enteric Disease Study 2009-2014.                                                   | Ceará     | 2009-2014 | Survey                |
| Diarrheal diseases | Guerrant RL, Kirchhoff LV, Shields DS, Nations MK, Leslie J, de Sousa MA, Araujo JG, Correia LL, Sauer KT, McClelland KE. Prospective study of diarrheal illnesses in northeastern Brazil: patterns of disease, nutritional impact, etiologies, and risk factors. . 1983; 148(6): 986-97.                                                        |           | 1978-1980 | Scientific literature |
| Diarrheal diseases | Dulgheroff AC, Figueiredo EF, Moreira LP, Moreira KC, Moura LM, Gouvã VS, Domingues AL. Distribution of rotavirus genotypes after vaccine introduction in the Triângulo Mineiro region of Brazil: 4-Year follow-up study. . 2012; 55(1): 67-71.                                                                                                  |           | 2007-2010 | Scientific literature |
| Diarrheal diseases | Siqueira JA, Linhares Ada C, de Carvalho TC, Araújo GC, Oliveira Dde S, Dos Santos MC, de Sousa MS, Justino MC, Mascarenhas JD, Gabbay YB. Norovirus infection in children admitted to hospital for acute gastroenteritis in Belém, Pará, Northern Brazil. . 2013; 85(4): 737-44.                                                                |           | 2008-2010 | Scientific literature |
| Diarrheal diseases | Linhares AC, Monção HC, Gabbay YB, de Araújo VL, Serruya AC, Loureiro EC. Acute diarrhoea associated with rotavirus among children living in Belém, Brazil. . 1983; 77(3): 384-90.                                                                                                                                                               |           | 1979-1980 | Scientific literature |
| Diarrheal diseases | Linhares AC, Monção HC, Gabbay YB, de Araújo VL, Serruya AC, Loureiro EC. Acute diarrhoea associated with rotavirus among children living in Belém, Brazil. . 1983; 77(3): 384-90.                                                                                                                                                               |           | 1979-1980 | Scientific literature |
| Diarrheal diseases | Linhares AC, Monção HC, Gabbay YB, de Araújo VL, Serruya AC, Loureiro EC. Acute diarrhoea associated with rotavirus among children living in Belém, Brazil. . 1983; 77(3): 384-90.                                                                                                                                                               |           | 1979-1980 | Scientific literature |
| Diarrheal diseases | Linhares AC, Monção HC, Gabbay YB, de Araújo VL, Serruya AC, Loureiro EC. Acute diarrhoea associated with rotavirus among children living in Belém, Brazil. . 1983; 77(3): 384-90.                                                                                                                                                               |           | 1979-1980 | Scientific literature |
| Diarrheal diseases | Rácz ML, Candelias JA, Trabułsi JR, Murahowski J. Diarrheal diseases in Brazil: clinical features of rotavirus-associated gastroenteritis in children. . 1988; 4(3): 382-5.                                                                                                                                                                      |           | 1986-1987 | Scientific literature |
| Diarrheal diseases | Rácz ML, Candelias JA, Trabułsi JR, Murahowski J. Diarrheal diseases in Brazil: clinical features of rotavirus-associated gastroenteritis in children. . 1988; 4(3): 382-5.                                                                                                                                                                      |           | 1986-1987 | Scientific literature |
| Diarrheal diseases | Nunes MRCM, Magalhães PP, Penna FJ, Nunes JMM, Mendes EN. Diarrhea associated with Shigella in children and susceptibility to antimicrobials. . 2012; 88(2): 125-8.                                                                                                                                                                              |           | 2004-2007 | Scientific literature |
| Diarrheal diseases | Nunes MRCM, Magalhães PP, Penna FJ, Nunes JMM, Mendes EN. Diarrhea associated with Shigella in children and susceptibility to antimicrobials. . 2012; 88(2): 125-8.                                                                                                                                                                              |           | 2004-2007 | Scientific literature |
| Diarrheal diseases | Nunes AA, de Mello LM, Parrode RN, Bittar JPM, Domingues AL da S. Prevalence of rotavirus in acute diarrhea and its association with clinical signs and symptoms. . 2010; 56(3): 212-3.                                                                                                                                                          |           | 2005-2007 | Scientific literature |
| Diarrheal diseases | Nunes AA, de Mello LM, Parrode RN, Bittar JPM, Domingues AL da S. Prevalence of rotavirus in acute diarrhea and its association with clinical signs and symptoms. . 2010; 56(3): 212-3.                                                                                                                                                          |           | 2005-2007 | Scientific literature |
| Diarrheal diseases | Sáfadi MAP, Berezin EN, Munford V, Almeida FJ, de Moraes JC, Pinheiro CF, Racz ML. Hospital-based surveillance to evaluate the impact of rotavirus vaccination in São Paulo, Brazil. . 2010; 29(11): 1019-22.                                                                                                                                    |           | 2004-2008 | Scientific literature |
| Diarrheal diseases | Sáfadi MAP, Berezin EN, Munford V, Almeida FJ, de Moraes JC, Pinheiro CF, Racz ML. Hospital-based surveillance to evaluate the impact of rotavirus vaccination in São Paulo, Brazil. . 2010; 29(11): 1019-22.                                                                                                                                    |           | 2004-2008 | Scientific literature |
| Diarrheal diseases | Parashar UD, Cunliffe NA, Nakagomi T. Effectiveness of monovalent rotavirus vaccine (Rotarix) against severe diarrhea caused by serotypically unrelated G2P[4] strains in Brazil. . 2010; 20(13): 363-9.                                                                                                                                         |           | 2006-2008 | Scientific literature |
| Diarrheal diseases | Parashar UD, Cunliffe NA, Nakagomi T. Effectiveness of monovalent rotavirus vaccine (Rotarix) against severe diarrhea caused by serotypically unrelated G2P[4] strains in Brazil. . 2010; 20(13): 363-9.                                                                                                                                         |           | 2006-2008 | Scientific literature |
| Diarrheal diseases | Dulgheroff AC, Figueiredo EF, Moreira LP, Moreira KC, Moura LM, Gouvã VS, Domingues AL. Distribution of rotavirus genotypes after vaccine introduction in the Triângulo Mineiro region of Brazil: 4-Year follow-up study. . 2012; 55(1): 67-71.                                                                                                  |           | 2007-2010 | Scientific literature |
| Diarrheal diseases | Gurgel RG, Bohland AK, Vieira SCF, Oliveira DMP, Fontes PB, Barros VF, Ramos MF, Dove W, Nakagomi T, Nakagomi O, Correia JB, Cunliffe N, Cuevas LE. Incidence of rotavirus and all-cause diarrhea in northeast Brazil following the introduction of a national vaccination program. . 2009; 137(6): 1970-5.                                      |           | 2004-2008 | Scientific literature |
| Diarrheal diseases | Sartori AMC, Valentim J, de Soárez PC, Novaes HMD. Rotavirus morbidity and mortality in children in Brazil. . 2008; 23(2): 92-100.                                                                                                                                                                                                               |           | 1986-2006 | Scientific literature |
| Diarrheal diseases | Fang GD, Lima AA, Martins CV, Nataro JP, Guerrant RL. Etiology and epidemiology of persistent diarrhea in northeastern Brazil: a hospital-based, prospective, case-control study. . 1995; 21(2): 137-44.                                                                                                                                         |           | 1988-1991 | Scientific literature |
| Diarrheal diseases | World Health Organization (WHO). WHO Global Health Observatory - Cholera: Number of Reported Cases by Country. Geneva, Switzerland: World Health Organization (WHO).                                                                                                                                                                             | Global    | 1991-2011 | Epi surveillance      |
| Diarrheal diseases | World Health Organization (WHO). WHO Global Health Observatory - Cholera: Number of Reported Cases by Country. Geneva, Switzerland: World Health Organization (WHO).                                                                                                                                                                             | Global    | 1991-2011 | Epi surveillance      |
| Diarrheal diseases | Brazilian Center for Analysis and Planning (CEBRAP), Brazilian Institute of Public Opinion and Statistics (IBOPE), Ministry of Health (Brazil). Brazil National Demographic and Health Survey of Children and Women 2006-2007. Rio de Janeiro, Brazil: Ministry of Health (Brazil).                                                              | Country   | 2006-2007 | Survey                |
| Diarrheal diseases | Health Institute (São Paulo, Brazil), State University of Campinas, São Paulo Municipal Health Department, São Paulo State University, University of São Paulo. Brazil - São Paulo Health Survey 2008-2009.                                                                                                                                      | São Paulo | 2002-2008 | Survey                |
| Diarrheal diseases | Brazilian Institute of Geography and Statistics (IBGE), Ministry of Health (Brazil), Ministry of Planning, Budget, and Management (Brazil). Brazil National Health Survey 2013. Rio de Janeiro, Brazil: Brazilian Institute of Geography and Statistics (IBGE).                                                                                  | Country   | 2013-2014 | Survey                |
| Diarrheal diseases | Norwegian Institute of Public Health. Norway Cause of Death Registry 1982. Oslo, Norway: Norwegian Institute of Public Health.                                                                                                                                                                                                                   | Country   | 2007-2008 | Vital registration    |
| Diarrheal diseases | Norwegian Institute of Public Health. Norway Cause of Death Registry 1982. Oslo, Norway: Norwegian Institute of Public Health.                                                                                                                                                                                                                   | Country   | 2007-2008 | Vital registration    |
| Diarrheal diseases | Norwegian Institute of Public Health. Norway Cause of Death Registry 1982. Oslo, Norway: Norwegian Institute of Public Health.                                                                                                                                                                                                                   | Country   | 2007-2008 | Vital registration    |
| Diarrheal diseases | Norwegian Institute of Public Health. Norway Cause of Death Registry 1982. Oslo, Norway: Norwegian Institute of Public Health.                                                                                                                                                                                                                   | Country   | 2007-2008 | Vital registration    |
| Diarrheal diseases | Sousa MJ, Mendes EN, Collares GB, P7ret-Filho LA, Penna FJ, Magalhães PP. Shigella in Brazilian children with acute diarrhoea: prevalence, antimicrobial resistance and virulence genes. . 2013; 108(1): 30-5.                                                                                                                                   |           | 2004-2005 | Scientific literature |
| Diarrheal diseases | Sousa MJ, Mendes EN, Collares GB, P7ret-Filho LA, Penna FJ, Magalhães PP. Shigella in Brazilian children with acute diarrhoea: prevalence, antimicrobial resistance and virulence genes. . 2013; 108(1): 30-5.                                                                                                                                   |           | 2004-2005 | Scientific literature |
| Diarrheal diseases | Siqueira JA, Linhares Ada C, de Carvalho TC, Araújo GC, Oliveira Dde S, Dos Santos MC, de Sousa MS, Justino MC, Mascarenhas JD, Gabbay YB. Norovirus infection in children admitted to hospital for acute gastroenteritis in Belém, Pará, Northern Brazil. . 2013; 85(4): 737-44.                                                                |           | 2008-2010 | Scientific literature |
| Diarrheal diseases | Gurgel RG, Bohland AK, Vieira SCF, Oliveira DMP, Fontes PB, Barros VF, Ramos MF, Dove W, Nakagomi T, Nakagomi O, Correia JB, Cunliffe N, Cuevas LE. Incidence of rotavirus and all-cause diarrhea in northeast Brazil following the introduction of a national vaccination program. . 2009; 137(6): 1970-5.                                      |           | 2006-2008 | Scientific literature |
| Diarrheal diseases | Fang GD, Lima AA, Martins CV, Nataro JP, Guerrant RL. Etiology and epidemiology of persistent diarrhea in northeastern Brazil: a hospital-based, prospective, case-control study. . 1995; 21(2): 137-44.                                                                                                                                         |           | 1988-1991 | Scientific literature |
| Diarrheal diseases | The prevalence of norovirus, astrovirus and adenovirus infections among hospitalised children with acute gastroenteritis in Porto Velho, state of Rondonia, western Brazilian Amazon. . 2015; 110(2): 215-21.                                                                                                                                    |           | 2010-2012 | Scientific literature |
| Diarrheal diseases | Brazilian Society for Family Welfare (BEMFAM), Westinghouse; Institute for Resource Development. Brazil Demographic and Health Survey 1986. Columbia, United States: Westinghouse; Institute for Resource Development.                                                                                                                           | Country   | 1986      | Survey                |
| Diarrheal diseases | Longitudinal study of Cryptosporidium infection in children in northeastern Brazil. . 1999; 180(1): 167-75.                                                                                                                                                                                                                                      |           | 1989-1993 | Scientific literature |
| Diarrheal diseases | Schorling JB, Wanke CA, Schorling SK, McAuliffe JF, De Souza MA, Guerrant RL. A prospective study of persistent diarrhea among children in an urban Brazilian slum. Patterns of occurrence and etiologic agents. . 1990; 132(1): 144-56.                                                                                                         |           | 1985-1986 | Scientific literature |
| Diarrheal diseases | Brazilian Society for Family Welfare (BEMFAM), Macro International, Inc. Brazil Demographic and Health Survey 1991. Calverton, United States: Macro International, Inc.                                                                                                                                                                          | Country   | 1991      | Survey                |
| Diarrheal diseases | Schorling JB, Wanke CA, Schorling SK, McAuliffe JF, De Souza MA, Guerrant RL. A prospective study of persistent diarrhea among children in an urban Brazilian slum. Patterns of occurrence and etiologic agents. . 1990; 132(1): 144-56.                                                                                                         |           | 1985-1986 | Scientific literature |
| Diarrheal diseases | Lima AA, Moore SR, Barbosa MS Jr, Soares AM, Schlegelner MA, Newman RD, Soares CL, Nataro JP, Fedorko DP, Wuhib T, Schorling JB, Guerrant RL. Persistent diarrhea signals a critical period of increased diarrhea burdens and nutritional shortfalls: a prospective cohort study among children in northeastern Brazil. . 2000; 181(5): 1643-51. |           | 1989-1993 | Scientific literature |

|                                |                                                                                                                                                                                                                                                                                                                                              |           |           |                       |
|--------------------------------|----------------------------------------------------------------------------------------------------------------------------------------------------------------------------------------------------------------------------------------------------------------------------------------------------------------------------------------------|-----------|-----------|-----------------------|
| Diarrheal diseases             | Brazilian Society for Family Welfare (BEMFAM), Macro International, Inc. Brazil Demographic and Health Survey 1996. Calverton, United States: Macro International, Inc.                                                                                                                                                                      | Country   | 1996      | Survey                |
| Diarrheal diseases             | Schorling JB, Wanke CA, Schorling SK, McAuliffe JF, De Souza MA, Guerrant RL. A prospective study of persistent diarrhea among children in an urban Brazilian slum. Patterns of occurrence and etiologic agents. .1990; 132(1): 144-56.                                                                                                      |           | 1985-1986 | Scientific literature |
| Diarrheal diseases             | Lima AA, Moore SR, Barboza MS Jr, Soares AM, Schlepner MA, Newman RD, Sears CL, Nataro JP, Fedorko DP, Wuhib T, Schorling JB, Guerrant RL. Persistent diarrhea signals a critical period of increased diarrhea burdens and nutritional shortfalls: a prospective cohort study among children in northeastern Brazil. .2000; 181(5): 1643-51. |           | 1989-1993 | Scientific literature |
| Diarrheal diseases             | Brazil World Health Survey 2003                                                                                                                                                                                                                                                                                                              | Country   | 2002-2003 | Survey                |
| Diarrheal diseases             | Schorling JB, Wanke CA, Schorling SK, McAuliffe JF, De Souza MA, Guerrant RL. A prospective study of persistent diarrhea among children in an urban Brazilian slum. Patterns of occurrence and etiologic agents. .1990; 132(1): 144-56.                                                                                                      |           | 1985-1986 | Scientific literature |
| Diarrheal diseases             | Longitudinal study of Cryptosporidium infection in children in northeastern Brazil. .1999; 180(1): 167-75.                                                                                                                                                                                                                                   |           | 1989-1993 | Scientific literature |
| Diarrheal diseases             | Lima AA, Moore SR, Barboza MS Jr, Soares AM, Schlepner MA, Newman RD, Sears CL, Nataro JP, Fedorko DP, Wuhib T, Schorling JB, Guerrant RL. Persistent diarrhea signals a critical period of increased diarrhea burdens and nutritional shortfalls: a prospective cohort study among children in northeastern Brazil. .2000; 181(5): 1643-51. |           | 1989-1993 | Scientific literature |
| Diarrheal diseases             | Lima AA, Moore SR, Barboza MS Jr, Soares AM, Schlepner MA, Newman RD, Sears CL, Nataro JP, Fedorko DP, Wuhib T, Schorling JB, Guerrant RL. Persistent diarrhea signals a critical period of increased diarrhea burdens and nutritional shortfalls: a prospective cohort study among children in northeastern Brazil. .2000; 181(5): 1643-51. |           | 1989-1993 | Scientific literature |
| Diarrheal diseases             | Lima AA, Moore SR, Barboza MS Jr, Soares AM, Schlepner MA, Newman RD, Sears CL, Nataro JP, Fedorko DP, Wuhib T, Schorling JB, Guerrant RL. Persistent diarrhea signals a critical period of increased diarrhea burdens and nutritional shortfalls: a prospective cohort study among children in northeastern Brazil. .2000; 181(5): 1643-51. |           | 1989-1993 | Scientific literature |
| Diarrheal diseases             | Schorling JB, Wanke CA, Schorling SK, McAuliffe JF, De Souza MA, Guerrant RL. A prospective study of persistent diarrhea among children in an urban Brazilian slum. Patterns of occurrence and etiologic agents. .1990; 132(1): 144-56.                                                                                                      |           | 1985-1986 | Scientific literature |
| Diarrheal diseases             | Lima AA, Moore SR, Barboza MS Jr, Soares AM, Schlepner MA, Newman RD, Sears CL, Nataro JP, Fedorko DP, Wuhib T, Schorling JB, Guerrant RL. Persistent diarrhea signals a critical period of increased diarrhea burdens and nutritional shortfalls: a prospective cohort study among children in northeastern Brazil. .2000; 181(5): 1643-51. |           | 1989-1993 | Scientific literature |
| Diarrheal diseases             | Lima AA, Moore SR, Barboza MS Jr, Soares AM, Schlepner MA, Newman RD, Sears CL, Nataro JP, Fedorko DP, Wuhib T, Schorling JB, Guerrant RL. Persistent diarrhea signals a critical period of increased diarrhea burdens and nutritional shortfalls: a prospective cohort study among children in northeastern Brazil. .2000; 181(5): 1643-51. |           | 1989-1993 | Scientific literature |
| Diarrheal diseases             | Ministry of Health (Brazil). Brazil Hospital Information System 1997. Rio de Janeiro, Brazil: Ministry of Health (Brazil).                                                                                                                                                                                                                   | Country   | 1993-1997 | Administrative record |
| Diarrheal diseases             | Lima AA, Moore SR, Barboza MS Jr, Soares AM, Schlepner MA, Newman RD, Sears CL, Nataro JP, Fedorko DP, Wuhib T, Schorling JB, Guerrant RL. Persistent diarrhea signals a critical period of increased diarrhea burdens and nutritional shortfalls: a prospective cohort study among children in northeastern Brazil. .2000; 181(5): 1643-51. |           | 1989-1993 | Scientific literature |
| Diarrheal diseases             | Barreto ML, Santos LM, Assis AM, Araújo MP, Farenzena GG, Santos PA, Fiaccone RL. Effect of vitamin A supplementation on diarrhoea and acute lower-respiratory-tract infections in young children in Brazil. .1994; 344(8917): 228-31.                                                                                                       |           | 1990-1991 | Scientific literature |
| Diarrheal diseases             | Lima AA, Moore SR, Barboza MS Jr, Soares AM, Schlepner MA, Newman RD, Sears CL, Nataro JP, Fedorko DP, Wuhib T, Schorling JB, Guerrant RL. Persistent diarrhea signals a critical period of increased diarrhea burdens and nutritional shortfalls: a prospective cohort study among children in northeastern Brazil. .2000; 181(5): 1643-51. |           | 1989-1993 | Scientific literature |
| Intestinal infectious diseases | Ministry of Health (Brazil). Brazil Information System for Notifiable Diseases - Typhoid Fever.                                                                                                                                                                                                                                              | Country   | 2001-2011 | Epi surveillance      |
| Lower respiratory infections   | Ministry of Health (Brazil). Brazil Hospital Information System 1997. Rio de Janeiro, Brazil: Ministry of Health (Brazil).                                                                                                                                                                                                                   | Country   | 1993-1997 | Administrative record |
| Lower respiratory infections   | Health Institute (São Paulo, Brazil), State University of Campinas, São Paulo Municipal Health Department, São Paulo State University, University of São Paulo. Brazil - São Paulo Health Survey 2008-2009.                                                                                                                                  | São Paulo | 2002-2008 | Survey                |
| Lower respiratory infections   | Buzzo AR, Roberts C, Mollinedo LG, Quevedo JM, Casas GL, Soldevilla JMS. Morbidity and mortality of pneumonia in adults in six Latin American countries. .2013; 17(9): e673-677.                                                                                                                                                             |           | 2009      | Scientific literature |
| Lower respiratory infections   | Ministry of Health (Brazil). Brazil Hospital Information System 1998-2002.                                                                                                                                                                                                                                                                   |           | 1998-2002 | Administrative record |
| Lower respiratory infections   | Salomão Junior JB, Gardinassi LGA, Simas PVM, Bittar CO, Souza FP, Rahal P, Zanetta DMT. Human respiratory syncytial virus in children hospitalized for acute lower respiratory infection. .2011; 87(3): 21924.                                                                                                                              |           | 2004-2005 | Scientific literature |
| Lower respiratory infections   | Guatara SB, Watanabe AS, Camargo CN, Passos AM, Parmezan SN, Tomazella TK, Carraro E, Kamikawa J, Granato C, Bellei N. Surveillance of influenza A H1N1 2009 among school children during 2009 and 2010 in São Paulo, Brazil. .2012; 45(5): 563-6.                                                                                           |           | 2009-2010 | Scientific literature |
| Lower respiratory infections   | Guatara SB, Watanabe AS, Camargo CN, Passos AM, Parmezan SN, Tomazella TK, Carraro E, Kamikawa J, Granato C, Bellei N. Surveillance of influenza A H1N1 2009 among school children during 2009 and 2010 in São Paulo, Brazil. .2012; 45(5): 563-6.                                                                                           |           | 2009-2010 | Scientific literature |
| Lower respiratory infections   | Brazilian Institute of Geography and Statistics (IBGE), Ministry of Health (Brazil), Ministry of Planning, Budget, and Management (Brazil). Brazil National Health Survey 2013. Rio de Janeiro, Brazil: Brazilian Institute of Geography and Statistics (IBGE).                                                                              | Country   | 2013-2014 | Survey                |
| Lower respiratory infections   | Brazil World Health Survey 2003                                                                                                                                                                                                                                                                                                              | Country   | 2002-2003 | Survey                |
| Lower respiratory infections   | Ministry of Health (Brazil). Brazil Hospital Information System 2013-2014.                                                                                                                                                                                                                                                                   |           | 2013-2017 | Administrative record |
| Lower respiratory infections   | Ministry of Health (Brazil). Brazil Hospital Information System 2008-2012.                                                                                                                                                                                                                                                                   |           | 2008-2012 | Administrative record |
| Lower respiratory infections   | Ministry of Health (Brazil). Brazil Hospital Information System 2003-2007.                                                                                                                                                                                                                                                                   |           | 2003-2007 | Administrative record |
| Lower respiratory infections   | Salomão Junior JB, Gardinassi LGA, Simas PVM, Bittar CO, Souza FP, Rahal P, Zanetta DMT. Human respiratory syncytial virus in children hospitalized for acute lower respiratory infection. .2011; 87(3): 21924.                                                                                                                              |           | 2004-2005 | Scientific literature |
| Upper respiratory infections   | Cunha A. Relationship between acute respiratory infection and malnutrition in children under 5 years of age. .2000; 5(89): 608-609.                                                                                                                                                                                                          |           | 1991      | Scientific literature |
| Upper respiratory infections   | Brazilian Society for Family Welfare (BEMFAM), Macro International, Inc. Brazil Demographic and Health Survey 1991. Calverton, United States: Macro International, Inc.                                                                                                                                                                      | Country   | 1991      | Survey                |
| Upper respiratory infections   | Brazilian Society for Family Welfare (BEMFAM), Macro International, Inc. Brazil Demographic and Health Survey 1996. Calverton, United States: Macro International, Inc.                                                                                                                                                                      | Country   | 1996      | Survey                |
| Otitis media                   | Godinho RN, Gonçalves TM, Nunes FB, Becker CG, Becker HM, Guimarães RE, Sanfins F, Colosimo EA, Oliveira RG, Lamounier JA. Prevalence and impact of chronic otitis media in school age children in Brazil First epidemiologic study concerning chronic otitis media in Latin America. .2001; 61(3): 223-32.                                  |           | 1999-2001 | Scientific literature |
| Meningitis                     | Ministry of Health (Brazil). Brazil Hospital Information System 1997. Rio de Janeiro, Brazil: Ministry of Health (Brazil).                                                                                                                                                                                                                   | Country   | 1993-1997 | Administrative record |
| Meningitis                     | Health Institute (São Paulo, Brazil), State University of Campinas, São Paulo Municipal Health Department, São Paulo State University, University of São Paulo. Brazil - São Paulo Health Survey 2008-2009.                                                                                                                                  | São Paulo | 2002-2008 | Survey                |
| Meningitis                     | Brazilian Institute of Geography and Statistics (IBGE), Ministry of Health (Brazil), Ministry of Planning, Budget, and Management (Brazil). Brazil National Health Survey 2013. Rio de Janeiro, Brazil: Brazilian Institute of Geography and Statistics (IBGE).                                                                              | Country   | 2013-2014 | Survey                |
| Meningitis                     | Ministry of Health (Brazil). Brazil Hospital Information System 1998-2002.                                                                                                                                                                                                                                                                   |           | 1998-2002 | Administrative record |
| Meningitis                     | Ministry of Health (Brazil). Brazil Hospital Information System 2003-2007.                                                                                                                                                                                                                                                                   |           | 2003-2007 | Administrative record |
| Meningitis                     | Facklam RR, Reis MG, Ko AI. Population-based survey of antimicrobial susceptibility and serotype distribution of Streptococcus pneumoniae from meningitis patients in Salvador, Brazil. .2002; 40(1): 275-7.                                                                                                                                 |           | 1995-1999 | Scientific literature |
| Meningitis                     | Ministry of Health (Brazil). Brazil Hospital Information System 2008-2012.                                                                                                                                                                                                                                                                   |           | 2008-2012 | Administrative record |
| Meningitis                     | Berezin EN, Carvalho ES, Casagrande S, Brandileone MC, Mimica IM, Farhat CK. Streptococcus pneumoniae penicillin-nonsusceptible strains in invasive infections in Sao Paulo, Brazil. .1996; 15(11): 1051-3.                                                                                                                                  |           | 1989-1993 | Scientific literature |
| Meningitis                     | Ministry of Health (Brazil). Brazil Hospital Information System 2013-2014.                                                                                                                                                                                                                                                                   |           | 2013-2017 | Administrative record |
| Meningitis                     | Brazil World Health Survey 2003                                                                                                                                                                                                                                                                                                              | Country   | 2002-2003 | Survey                |
| Meningitis                     | Souza SF de, Costa M da CN, Palm JS, Natividade MS da, Pereira SM, Andrade AM de S, Teixeira MG. Bacterial meningitis and living conditions. .2012; 45(3): 323-8.                                                                                                                                                                            |           | 2004-2009 | Scientific literature |
| Pneumococcal meningitis        | Antonuk SA, Zanon França M, Tannous Tahan T, Oliveira Rossoni AM, Dal-Ri Moreira S, Rodrigues Cruz C, Dal-Fra Ducci R, Hamdar F, Tielo Freire Kira A. Study of 312 children with meningitis treated at a University Hospital in the South of Brazil. .2009; 69(1 Pt 1): 127-32.                                                              |           | 2003-2007 | Scientific literature |
| Pneumococcal meningitis        | Souza SF de, Costa M da CN, Palm JS, Natividade MS da, Pereira SM, Andrade AM de S, Teixeira MG. Bacterial meningitis and living conditions. .2012; 45(3): 323-8.                                                                                                                                                                            |           | 2004-2009 | Scientific literature |

|                                |                                                                                                                                                                                                                                                                                                                                           |           |           |                       |
|--------------------------------|-------------------------------------------------------------------------------------------------------------------------------------------------------------------------------------------------------------------------------------------------------------------------------------------------------------------------------------------|-----------|-----------|-----------------------|
| H influenzae type B meningitis | Antoniuk SA, Zanon França M, Tannous Tahan T, Oliveira Rossoni AM, Dal-Ri Moreira S, Rodrigues Cruz C, Dal-Pra Ducci R, Hamdar F, Tiekio Frare Kira A. Study of 312 children with meningitis treated at a University Hospital in the South of Brazil. . 2009; 69(1 Pt 1): 127-32.                                                         |           | 2003-2007 | Scientific literature |
| H influenzae type B meningitis | Souza SF de, Costa M da CN, Palm JS, Natividade MS da, Pereira SM, Andrade AM de S, Teixeira MG. Bacterial meningitis and living conditions. . 2012; 45(3): 323-8.                                                                                                                                                                        |           | 2004-2009 | Scientific literature |
| Meningococcal meningitis       | Souza SF de, Costa M da CN, Palm JS, Natividade MS da, Pereira SM, Andrade AM de S, Teixeira MG. Bacterial meningitis and living conditions. . 2012; 45(3): 323-8.                                                                                                                                                                        |           | 2004-2009 | Scientific literature |
| Meningococcal meningitis       | Antoniuk SA, Zanon França M, Tannous Tahan T, Oliveira Rossoni AM, Dal-Ri Moreira S, Rodrigues Cruz C, Dal-Pra Ducci R, Hamdar F, Tiekio Frare Kira A. Study of 312 children with meningitis treated at a University Hospital in the South of Brazil. . 2009; 69(1 Pt 1): 127-32.                                                         |           | 2003-2007 | Scientific literature |
| Other meningitis               | Souza SF de, Costa M da CN, Palm JS, Natividade MS da, Pereira SM, Andrade AM de S, Teixeira MG. Bacterial meningitis and living conditions. . 2012; 45(3): 323-8.                                                                                                                                                                        |           | 2004-2009 | Scientific literature |
| Other meningitis               | Antoniuk SA, Zanon França M, Tannous Tahan T, Oliveira Rossoni AM, Dal-Ri Moreira S, Rodrigues Cruz C, Dal-Pra Ducci R, Hamdar F, Tiekio Frare Kira A. Study of 312 children with meningitis treated at a University Hospital in the South of Brazil. . 2009; 69(1 Pt 1): 127-32.                                                         |           | 2003-2007 | Scientific literature |
| Encephalitis                   | Brazil World Health Survey 2003                                                                                                                                                                                                                                                                                                           | Country   | 2002-2003 | Survey                |
| Encephalitis                   | Brazilian Institute of Geography and Statistics (IBGE). Ministry of Health (Brazil), Ministry of Planning, Budget, and Management (Brazil). Brazil National Health Survey 2013. Rio de Janeiro, Brazil: Brazilian Institute of Geography and Statistics (IBGE).                                                                           | Country   | 2013-2014 | Survey                |
| Encephalitis                   | Ministry of Health (Brazil). Brazil Hospital Information System 2013-2014.                                                                                                                                                                                                                                                                |           | 2013-2017 | Administrative record |
| Encephalitis                   | Ministry of Health (Brazil). Brazil Hospital Information System 2008-2012.                                                                                                                                                                                                                                                                |           | 2008-2012 | Administrative record |
| Encephalitis                   | Ministry of Health (Brazil). Brazil Hospital Information System 2003-2007.                                                                                                                                                                                                                                                                |           | 2003-2007 | Administrative record |
| Encephalitis                   | Health Institute (São Paulo, Brazil), State University of Campinas, São Paulo Municipal Health Department, São Paulo State University, University of São Paulo, Brazil - São Paulo Health Survey 2008-2009.                                                                                                                               | São Paulo | 2002-2008 | Survey                |
| Encephalitis                   | Ministry of Health (Brazil). Brazil Hospital Information System 1998-2002.                                                                                                                                                                                                                                                                |           | 1998-2002 | Administrative record |
| Encephalitis                   | Ministry of Health (Brazil). Brazil Hospital Information System 1997. Rio de Janeiro, Brazil: Ministry of Health (Brazil).                                                                                                                                                                                                                | Country   | 1993-1997 | Administrative record |
| Whooping cough                 | UNICEF Reported Disease Incidence Time Series. Geneva, Switzerland: World Health Organization (WHO).                                                                                                                                                                                                                                      | Global    | 1982-2015 | Epi surveillance      |
| Measles                        | UNICEF Reported Disease Incidence Time Series. Geneva, Switzerland: World Health Organization (WHO).                                                                                                                                                                                                                                      | Global    | 1980-2015 | Epi surveillance      |
| Varicella and herpes zoster    | of children with different social behaviour in the State of São Paulo, Brazil. . 2001; 127(3): 493-500.                                                                                                                                                                                                                                   |           | 1992-1998 | Scientific literature |
| Varicella and herpes zoster    | Yu AL, Costa JM, Amaku M, Pannuti CS, Souza VA, Zanetta DM, Burattini MN, Massad E, Azevedo RS. Three year seroepidemiological study of varicella-zoster virus in São Paulo, Brazil. . 2000; 42(3): 125-8.                                                                                                                                |           | 1992-1994 | Scientific literature |
| Malaria                        | Seasonal variation of anti-Plasmodium falciparum antibodies directed against a repetitive peptide of gametocyte antigen pfs2400 in the State of Amapá, Brazil as it appears in Malaria Atlas Project. Malaria Atlas Project Plasmodium Falciparum Parasite Rate Database. Oxford, United Kingdom: Malaria Atlas Project.                  |           | 1995      | Scientific literature |
| Malaria                        | Amazon basin: to treat or not to treat? as it appears in Malaria Atlas Project. Malaria Atlas Project Plasmodium Falciparum Parasite Rate Database. Oxford, United Kingdom: Malaria Atlas Project.                                                                                                                                        |           | 2006      | Scientific literature |
| Malaria                        | SPF66 vaccine trial in Brazil: conceptual framework study design and analytical approach as it appears in Malaria Atlas Project. Malaria Atlas Project Plasmodium Falciparum Parasite Rate Database. Oxford, United Kingdom: Malaria Atlas Project.                                                                                       |           | 1991      | Scientific literature |
| Malaria                        | Malaria is associated with poor school performance in an endemic area of the Brazilian Amazon as it appears in Malaria Atlas Project. Malaria Atlas Project Plasmodium Falciparum Parasite Rate Database. Oxford, United Kingdom: Malaria Atlas Project.                                                                                  |           | 2008      | Scientific literature |
| Malaria                        | Amazon basin of Brazil as it appears in Malaria Atlas Project. Malaria Atlas Project Plasmodium Falciparum Parasite Rate Database. Oxford, United Kingdom: Malaria Atlas Project.                                                                                                                                                         |           | 1987      | Scientific literature |
| Malaria                        | Sorologia da malária vivax no foco Aldeia dos Índios, Município de Peruíbe, Estado de São Paulo, 1984 a 1986 as it appears in Malaria Atlas Project. Malaria Atlas Project Plasmodium Falciparum Parasite Rate Database. Oxford, United Kingdom: Malaria Atlas Project.                                                                   |           | 1985-1986 | Scientific literature |
| Malaria                        | Epidemiology of disappearing Plasmodium vivax malaria: a case study in rural Amazonia as it appears in Malaria Atlas Project. Malaria Atlas Project Plasmodium Falciparum Parasite Rate Database. Oxford, United Kingdom: Malaria Atlas Project.                                                                                          |           | 2010-2013 | Scientific literature |
| Malaria                        | Naturally acquired antibodies to Plasmodium vivax Duffy binding protein (DBP) in Brazilian Amazon as it appears in Malaria Atlas Project. Malaria Atlas Project Plasmodium Falciparum Parasite Rate Database. Oxford, United Kingdom: Malaria Atlas Project.                                                                              | Country   | 2004-2005 | Scientific literature |
| Malaria                        | Concurrent helminthic infection protects schoolchildren with Plasmodium vivax from anemia as it appears in Malaria Atlas Project. Malaria Atlas Project Plasmodium Falciparum Parasite Rate Database. Oxford, United Kingdom: Malaria Atlas Project.                                                                                      | Country   | 2008      | Scientific literature |
| Malaria                        | Studies on Malaria in Serra do Navio Region, Amapá State, Brazil as it appears in Malaria Atlas Project. Malaria Atlas Project Plasmodium Falciparum Parasite Rate Database. Oxford, United Kingdom: Malaria Atlas Project.                                                                                                               | Amapá     | 1989-1991 | Report                |
| Malaria                        | Epidemiology of Malaria and Factors Associated with Asymptomatic Plasmodium Infection in a Population of Goldminers of the Brazilian Amazon as it appears in Malaria Atlas Project. Malaria Atlas Project Plasmodium Falciparum Parasite Rate Database. Oxford, United Kingdom: Malaria Atlas Project.                                    | Amazonas  | 1996      | Report                |
| Malaria                        | Brazil Plasmodium Falciparum Parasite Rate Data, Personal Communication with A.M. Siqueira, Instituto Nacional de Infectologia Evandro Chagas-Fiocruz, Rio de Janeiro 2015 as it appears in Malaria Atlas Project. Malaria Atlas Project Plasmodium Falciparum Parasite Rate Database. Oxford, United Kingdom: Malaria Atlas Project.     | Country   | 2008-2010 | Survey                |
| Malaria                        | in the Amazon Rio Negro area, Brazil as it appears in Malaria Atlas Project. Malaria Atlas Project Plasmodium Falciparum Parasite Rate Database. Oxford, United Kingdom: Malaria Atlas Project.                                                                                                                                           |           | 2002-2004 | Scientific literature |
| Malaria                        | Cross-sectional study defines difference in malaria morbidity in two Yanomami communities on Amazonian boundary between Brazil and Venezuela as it appears in Malaria Atlas Project. Malaria Atlas Project Plasmodium Falciparum Parasite Rate Database. Oxford, United Kingdom: Malaria Atlas Project.                                   |           | 1991      | Scientific literature |
| Malaria                        | Diagnosis of health conditions in a pan-mining community in the Tapajós River Basin, Itaituba, Pará, Brazil, 1992 as it appears in Malaria Atlas Project. Malaria Atlas Project Plasmodium Falciparum Parasite Rate Database. Oxford, United Kingdom: Malaria Atlas Project.                                                              |           | 1992      | Scientific literature |
| Malaria                        | Malaria epidemiology in low-endemicity areas of the Atlantic Forest in the Vale do Ribeira, São Paulo, Brazil as it appears in Malaria Atlas Project. Malaria Atlas Project Plasmodium Falciparum Parasite Rate Database. Oxford, United Kingdom: Malaria Atlas Project.                                                                  |           | 2002      | Scientific literature |
| Malaria                        | Low Frequency of Anti-Plasmodium Falciparum Circumsporozoite Repeat Antibodies and Rate of High Malaria Transmission in Endemic Areas of Rondonia State in Northwestern Brazil as it appears in Malaria Atlas Project. Malaria Atlas Project Plasmodium Falciparum Parasite Rate Database. Oxford, United Kingdom: Malaria Atlas Project. |           | 1986-1989 | Scientific literature |
| Malaria                        | Naturally acquired humoral and cellular immune responses to Plasmodium vivax merozoite surface protein 9 in Northwestern Amazon individuals as it appears in Malaria Atlas Project. Malaria Atlas Project Plasmodium Falciparum Parasite Rate Database. Oxford, United Kingdom: Malaria Atlas Project.                                    |           | 2004      | Scientific literature |
| Malaria                        | IL10A genotypic association with decreased IL-10 circulating levels in malaria infected individuals from endemic area of the Brazilian Amazon as it appears in Malaria Atlas Project. Malaria Atlas Project Plasmodium Falciparum Parasite Rate Database. Oxford, United Kingdom: Malaria Atlas Project.                                  |           | 2010-2011 | Scientific literature |
| Malaria                        | World Malaria Report 2013 as it appears in Malaria Atlas Project. Malaria Atlas Project Annual Parasite Incidence Database.                                                                                                                                                                                                               | Global    | 1990-1999 | Report                |
| Malaria                        | World Malaria Report 2015 as it appears in Malaria Atlas Project. Malaria Atlas Project Annual Parasite Incidence Database.                                                                                                                                                                                                               | Global    | 2001-2009 | Report                |
| Malaria                        | World Malaria Report 2016 as it appears in Malaria Atlas Project. Malaria Atlas Project Annual Parasite Incidence Database.                                                                                                                                                                                                               | Global    | 2000-2015 | Report                |
| Malaria                        | Brazil Epidemiological Surveillance Information System Malaria Case Notifications 2016 as it appears in Malaria Atlas Project. Malaria Atlas Project Annual Parasite Incidence Database.                                                                                                                                                  | Country   | 2009-2015 | Epi surveillance      |
| Malaria                        | Unstable hypopendemic malaria in Rondonia (western Amazon region, Brazil): epidemic outbreaks and work-associated incidence in an agro-industrial rural settlement as it appears in Malaria Atlas Project. Malaria Atlas Project Plasmodium Falciparum Parasite Rate Database. Oxford, United Kingdom: Malaria Atlas Project.             |           | 1991-1992 | Scientific literature |
| Malaria                        | Velho, Rondônia, in the Amazon region of Brazil as it appears in Malaria Atlas Project. Malaria Atlas Project Plasmodium Falciparum Parasite Rate Database. Oxford, United Kingdom: Malaria Atlas Project.                                                                                                                                |           | 2006      | Scientific literature |

|                |                                                                                                                                                                                                                                                                                                                                                                        |             |           |                       |
|----------------|------------------------------------------------------------------------------------------------------------------------------------------------------------------------------------------------------------------------------------------------------------------------------------------------------------------------------------------------------------------------|-------------|-----------|-----------------------|
| Malaria        | Antibodies anti Bloodstream and Circumsporozoite Antigens (Plasmodium vivax and Plasmodium malariae/P. brasilianum) in Areas of Very Low Malaria Endemicity in Brazil as it appears in Malaria Atlas Project. Malaria Atlas Project Plasmodium Falciparum Parasite Rate Database. Oxford, United Kingdom: Malaria Atlas Project.                                       |             | 1993-1994 | Scientific literature |
| Malaria        | from the state of Amapé, Brazil as it appears in Malaria Atlas Project. Malaria Atlas Project Plasmodium Falciparum Parasite Rate Database. Oxford, United Kingdom: Malaria Atlas Project.                                                                                                                                                                             |             | 1992      | Scientific literature |
| Malaria        | native Amazonian populations as it appears in Malaria Atlas Project. Malaria Atlas Project Plasmodium Falciparum Parasite Rate Database. Oxford, United Kingdom: Malaria Atlas Project.                                                                                                                                                                                |             | 1998-2000 | Scientific literature |
| Malaria        | Urban malaria in the Brazilian Western Amazon Region I: high prevalence of asymptomatic carriers in an urban riverside district is associated with a high level of clinical malaria as it appears in Malaria Atlas Project. Malaria Atlas Project Plasmodium Falciparum Parasite Rate Database. Oxford, United Kingdom: Malaria Atlas Project.                         |             | 2001-2004 | Scientific literature |
| Malaria        | Effects of immigration on the prevalence of malaria in rural areas of the Amazon basin of Brazil as it appears in Malaria Atlas Project. Malaria Atlas Project Plasmodium Falciparum Parasite Rate Database. Oxford, United Kingdom: Malaria Atlas Project.                                                                                                            |             | 1985-1986 | Scientific literature |
| Malaria        | [Effect of bed nets impregnated with deltamethrin on malaria morbidity in an area of the Brazilian Amazon] as it appears in Malaria Atlas Project. Malaria Atlas Project Plasmodium Falciparum Parasite Rate Database. Oxford, United Kingdom: Malaria Atlas Project.                                                                                                  |             | 1991      | Scientific literature |
| Malaria        | Mercury exposure and malaria prevalence among gold miners in Pará, Brazil as it appears in Malaria Atlas Project. Malaria Atlas Project Plasmodium Falciparum Parasite Rate Database. Oxford, United Kingdom: Malaria Atlas Project.                                                                                                                                   |             | 1997      | Scientific literature |
| Malaria        | Amazonian population as it appears in Malaria Atlas Project. Malaria Atlas Project Plasmodium Falciparum Parasite Rate Database. Oxford, United Kingdom: Malaria Atlas Project.                                                                                                                                                                                        |             | 2004-2006 | Scientific literature |
| Malaria        | Antibody response to the N and C-terminal regions of the Plasmodium vivax Merozoite Surface Protein 1 in individuals living in an area of exclusive transmission of P. vivax malaria in the north of Brazil as it appears in Malaria Atlas Project. Malaria Atlas Project Plasmodium Falciparum Parasite Rate Database. Oxford, United Kingdom: Malaria Atlas Project. |             | 1996-1997 | Scientific literature |
| Malaria        | Region of Rio Negro, Amazon] as it appears in Malaria Atlas Project. Malaria Atlas Project Plasmodium Falciparum Parasite Rate Database. Oxford, United Kingdom: Malaria Atlas Project.                                                                                                                                                                                |             | 2006      | Scientific literature |
| Malaria        | Amazon Basin of Brazil as it appears in Malaria Atlas Project. Malaria Atlas Project Plasmodium Falciparum Parasite Rate Database. Oxford, United Kingdom: Malaria Atlas Project.                                                                                                                                                                                      |             | 2002-2003 | Scientific literature |
| Malaria        | parasites, including a variant of Plasmodium vivax, in the population of two epidemiologically distinct areas in the state of Acre, Brazil as it appears in Malaria Atlas Project. Malaria Atlas Project Plasmodium Falciparum Parasite Rate Database. Oxford, United Kingdom: Malaria Atlas Project.                                                                  |             | 1990      | Scientific literature |
| Malaria        | [Malaria and hematological aspects among residents to be impacted by reservoirs for the Santo Antônio and Jirau Hydroelectric Power Stations, Rondônia State, Brazil] as it appears in Malaria Atlas Project. Malaria Atlas Project Plasmodium Falciparum Parasite Rate Database. Oxford, United Kingdom: Malaria Atlas Project.                                       |             | 2004-2005 | Scientific literature |
| Malaria        | Plasmodium vivax Duffy binding protein: baseline antibody responses and parasite polymorphisms in a well-consolidated settlement of the Amazon Region as it appears in Malaria Atlas Project. Malaria Atlas Project Plasmodium Falciparum Parasite Rate Database. Oxford, United Kingdom: Malaria Atlas Project.                                                       |             | 2008      | Scientific literature |
| Malaria        | Epidemiological and ecological aspects related to malaria in the area of influence of the lake at Ponto Primavera dam, in western Sao Paulo State, Brazil as it appears in Malaria Atlas Project. Malaria Atlas Project Plasmodium Falciparum Parasite Rate Database. Oxford, United Kingdom: Malaria Atlas Project.                                                   |             | 2000      | Scientific literature |
| Malaria        | Epidemiology of malaria in a hypoendemic Brazilian Amazon migrant population: a cohort study as it appears in Malaria Atlas Project. Malaria Atlas Project Plasmodium Falciparum Parasite Rate Database. Oxford, United Kingdom: Malaria Atlas Project.                                                                                                                |             | 1996-1997 | Scientific literature |
| Malaria        | enzyme immunoassay using bloodspot eluates as it appears in Malaria Atlas Project. Malaria Atlas Project Plasmodium Falciparum Parasite Rate Database. Oxford, United Kingdom: Malaria Atlas Project.                                                                                                                                                                  |             | 1991      | Scientific literature |
| Malaria        | Duffy-negative and Duffy-positive individuals as it appears in Malaria Atlas Project. Malaria Atlas Project Plasmodium Falciparum Parasite Rate Database. Oxford, United Kingdom: Malaria Atlas Project.                                                                                                                                                               |             | 2009      | Scientific literature |
| Malaria        | risk groups in an urban locality as it appears in Malaria Atlas Project. Malaria Atlas Project Plasmodium Falciparum Parasite Rate Database. Oxford, United Kingdom: Malaria Atlas Project.                                                                                                                                                                            |             | 1990      | Scientific literature |
| Malaria        | The epidemiology of malaria in Rondonia (Western Amazon region, Brazil): study of a riverine population as it appears in Malaria Atlas Project. Malaria Atlas Project Plasmodium Falciparum Parasite Rate Database. Oxford, United Kingdom: Malaria Atlas Project.                                                                                                     |             | 1994-1995 | Scientific literature |
| Malaria        | The Wai Wai Indians of South America: history and genetics as it appears in Malaria Atlas Project. Malaria Atlas Project Plasmodium Falciparum Parasite Rate Database. Oxford, United Kingdom: Malaria Atlas Project.                                                                                                                                                  |             | 1988      | Scientific literature |
| Malaria        | Brazilian Society for Family Welfare (BEMFAM), Macro International, Inc. Brazil Demographic and Health Survey 1991. Calverton, United States: Macro International, Inc.                                                                                                                                                                                                | Country     | 1991      | Survey                |
| Malaria        | Brazilian Society for Family Welfare (BEMFAM), Macro International, Inc. Brazil Demographic and Health Survey 1996. Calverton, United States: Macro International, Inc.                                                                                                                                                                                                | Country     | 1996      | Survey                |
| Malaria        | Malaria prevalence amongst Brazilian Indians assessed by a new mathematical model as it appears in Malaria Atlas Project. Malaria Atlas Project Plasmodium Falciparum Parasite Rate Database. Oxford, United Kingdom: Malaria Atlas Project.                                                                                                                           |             | 1985      | Scientific literature |
| Malaria        | parasites in five states of the Amazon region of Brazil as it appears in Malaria Atlas Project. Malaria Atlas Project Plasmodium Falciparum Parasite Rate Database. Oxford, United Kingdom: Malaria Atlas Project.                                                                                                                                                     |             | 1995-2003 | Scientific literature |
| Malaria        | Humoral immune response to the 72 kDa heat shock protein from Plasmodium falciparum in populations at hypoendemic areas of malaria in western Brazilian Amazon as it appears in Malaria Atlas Project. Malaria Atlas Project Plasmodium Falciparum Parasite Rate Database. Oxford, United Kingdom: Malaria Atlas Project.                                              |             | 1995      | Scientific literature |
| Malaria        | Parasitological Survey of the Population of Guariba-Colniza for Identification of Individuals with Asymptomatic Infection by Plasmodium, Colniza, Mato Grosso as it appears in Malaria Atlas Project. Malaria Atlas Project Plasmodium Falciparum Parasite Rate Database. Oxford, United Kingdom: Malaria Atlas Project.                                               | Mato Grosso | 1996-2006 | Report                |
| Malaria        | Seroprevalência da infecção pelo vírus da hepatite B e pelo plasmódio em Lábrea, Amazonas: estimativa da ocorrência de prováveis coinfeções as it appears in Malaria Atlas Project. Malaria Atlas Project Plasmodium Falciparum Parasite Rate Database. Oxford, United Kingdom: Malaria Atlas Project.                                                                 |             | 2000      | Scientific literature |
| Malaria        | Assessment of Mercury Exposure and Malaria in a Brazilian Amazon Riverine Community as it appears in Malaria Atlas Project. Malaria Atlas Project Plasmodium Falciparum Parasite Rate Database. Oxford, United Kingdom: Malaria Atlas Project.                                                                                                                         |             | 1999      | Scientific literature |
| Malaria        | Epidemiologic aspects of the malaria transmission cycle in an area of very low incidence in Brazil as it appears in Malaria Atlas Project. Malaria Atlas Project Plasmodium Falciparum Parasite Rate Database. Oxford, United Kingdom: Malaria Atlas Project.                                                                                                          |             | 2002-2003 | Scientific literature |
| Malaria        | Institute for Health Metrics and Evaluation (IHME). IHME GBD 2013 DisMod model input - Surveillance of Trypanosoma cruzi transmission by serological screening of schoolchildren. . 1992; 70(5): 625B.                                                                                                                                                                 | Global      | 1990-2016 | Modeled data          |
| Chagas disease | Pan American Health Organization (PAHO), Southern Cone Initiative (INCOISUR). Xth Meeting of the Intergovernmental Committee for the Elimination of Triatoma Infestans and the Interruption of American Trypanosomiasis by Transfusion. Washington, D.C., United States: Pan American Health Organization (PAHO), 2002.                                                | Country     | 2001      | Report                |
| Chagas disease | Carvalho EOC de, Rosa JA da, de Carvalho AA, Chaves HCO, Souza EA de, Ostermayer AL, Camargo LMA de. Study on Chagas disease occurrence in the municipality of Monte Negro, State of Rondônia, Brazilian Amazon. . 2011; 44(6): 703-7.                                                                                                                                 |             | 2007-2010 | Scientific literature |
| Chagas disease | Ostermayer AL, Passos ADC, Silveira AC, Ferreira AW, Macedo V, Prata AR. The national survey of seroprevalence for evaluation of the control of Chagas disease in Brazil (2001-2008). . 2011; 44(Suppl 2): 108-21.                                                                                                                                                     |             | 2001-2008 | Scientific literature |
| Chagas disease | Lima-Costa MF, Matos DL, Ribeiro ALP. Chagas disease predicts 10-year stroke mortality in community-dwelling elderly: the Bambuí cohort study of aging. . 2010; 41(11): 2477-82.                                                                                                                                                                                       | Country     | 1997      | Scientific literature |
| Chagas disease | Silva EM da, Rocha MO da C, Silva RC, Paixão G do C, Buzatti H, Santos AN, Nunes M do CP. Clinic and epidemiological study on Chagas disease in the Serra Azul district of Mateus Leme, central-western region of the State of Minas Gerais, Brazil. . 2010; 43(2): 178-81.                                                                                            |             | 2007      | Scientific literature |

|                        |                                                                                                                                                                                                                                                                                                                                                                                                                                                     |           |           |                       |
|------------------------|-----------------------------------------------------------------------------------------------------------------------------------------------------------------------------------------------------------------------------------------------------------------------------------------------------------------------------------------------------------------------------------------------------------------------------------------------------|-----------|-----------|-----------------------|
| Chagas disease         | Araújo AB, Castagno VD, Gallina T, Berne MEA. Prevalence of Chagas disease among pregnant women in the southern region of Rio Grande do Sul. . 2009; 42(6): 732-3.                                                                                                                                                                                                                                                                                  | Country   | 2004      | Scientific literature |
| Chagas disease         | Silva RA da, Goldenberg P. Chagas' disease in Porto Leticia, São Paulo: a comparative study in the Pontal the Paranapanema. . 2008; 41(6): 621-7.                                                                                                                                                                                                                                                                                                   |           | 2003-2005 | Scientific literature |
| Chagas disease         | Pan American Health Organization (PAHO). World Health Organization (WHO). Quantitative Estimation of Chagas in the Americas.                                                                                                                                                                                                                                                                                                                        | Global    | 2005      | Epi surveillance      |
| Chagas disease         | Salles G, Xavier S, Sousa A, Hasslocher-Moreno A, Cardoso C. Prognostic value of QT interval parameters for mortality risk stratification in Chagas' disease: results of a long-term follow-up study [Unpublished data]. . 2003; 108(3): 305-12.                                                                                                                                                                                                    |           | 1990-2015 | Scientific literature |
| Chagas disease         | Coutinho CF de S, Souza-Santos R, Teixeira NFD, Georg I, Gomes TF, Boia MN, dos Reis NB, Maia A de O, Lima MM. An entomoepidemiological investigation of Chagas disease in the state of Ceará, Northeast Region of Brazil. . 2014; 30(4): 785-93.                                                                                                                                                                                                   |           | 2008-2009 | Scientific literature |
| Chagas disease         | Ribeiro AL, dos Reis AM, Barros MV, de Sousa MR, Rocha AL, Perez AA, Pereira JB, Machado FS, Rocha MO. Brain natriuretic peptide and left ventricular dysfunction in Chagas' disease. . 2002; 36(9331): 461-2.                                                                                                                                                                                                                                      |           | 1999-2001 | Scientific literature |
| Chagas disease         | Brito CR do N, Sampaio GHF, Câmara ACJ da, Nunes DF, Azevedo PRM de, Chiari E, Galvão LM da C. Seroprevalence of Trypanosoma cruzi infection in the semi-arid rural zone of the State of Rio Grande do Norte, Brazil. . 2012; 45(3): 346-82.                                                                                                                                                                                                        |           | 2007-2009 | Scientific literature |
| Chagas disease         | Magalhães BML, Coelho LIARC, Maciel MG, Ferreira JMBB, Umezawa ES, Coura JR, Guerra JA de O, Barbosa M das GV. Serological survey for Chagas disease in the rural areas of Manaus, Coari, and Tefé in the Western Brazilian Amazon. . 2011; 44(5): 697-702.                                                                                                                                                                                         |           | 2007-2008 | Scientific literature |
| Chagas disease         | Ribeiro AL, Marcolino MS, Prineas RJ, Lima-Costa MF. Electrocardiographic abnormalities in elderly Chagas disease patients: 10-year follow-up of the Bambuí Cohort Study of Aging. . 2014; 3(1): e000632.                                                                                                                                                                                                                                           |           | 2011      | Scientific literature |
| Chagas disease         | Borges-Pereira J, Sarquis O, Zauza PL, Britto C, Lima MM. [Epidemiology of Chagas disease in four rural localities in Jaguaruana, State of Ceará: seroprevalence of infection, parasitemia and clinical characteristics]. . 2008; 41(4): 345-51.                                                                                                                                                                                                    |           | 2000-2002 | Scientific literature |
| Chagas disease         | Coura JR, Naranjo MA, Willcox HP. Chagas disease in the Brazilian Amazon. II. A serological survey. . 1995; 37(2): 103-7.                                                                                                                                                                                                                                                                                                                           |           | 1974-1994 | Scientific literature |
| Chagas disease         | Institute for Health Metrics and Evaluation (IHME). Modeled Chagas Birth Prevalence                                                                                                                                                                                                                                                                                                                                                                 |           | 1990-2016 | Modeled data          |
| Chagas disease         | Nastari I, Fernandes F, Patafino GM, Sachdev V, Capuani L, de Almeida-Neto C, Carrick DM, Wright D, Kavounis K, Gonzalez TT, Carneiro-Proietti AB, Custer B, Busch MP, Murphy EL; National Heart, Lung, and Blood Institute Retrovirus Epidemiology Donor Study-II (REDS-II), International Component. Ten-Year Incidence of Chagas Cardiomyopathy Among Asymptomatic Trypanosoma cruzi Seropositive Former Blood Donors. . 2013; 127(10): 1105-15. |           | 1996-2010 | Scientific literature |
| Chagas disease         | Destination and Origin - 2013 Revision. New York City, United States: United Nations Population Division.                                                                                                                                                                                                                                                                                                                                           | Global    | 1990-2013 | Administrative record |
| Chagas disease         | Nunes MC, Kreuser LJ, Ribeiro AL, Sousa GR, Costa HS, Botoni FA, de Souza AC, Gomes Marques VE, Fernandez AB, Teixeira AL, da Costa Rocha MO. Prevalence and risk factors of embolic cerebrovascular events associated with Chagas heart disease [Unpublished data]. . 2015; 10(3): 151-7.                                                                                                                                                          |           | 1990-2015 | Scientific literature |
| Visceral leishmaniasis | Health Institute (São Paulo, Brazil). State University of Campinas, São Paulo Municipal Health Department, São Paulo State University, University of São Paulo. Brazil - São Paulo Health Survey 2008-2009.                                                                                                                                                                                                                                         | São Paulo | 2002-2008 | Survey                |
| Visceral leishmaniasis | Ministry of Health (Brazil). Brazil Information System for Notifiable Diseases 2008.                                                                                                                                                                                                                                                                                                                                                                | Country   | 2008      | Epi surveillance      |
| Visceral leishmaniasis | Ministry of Health (Brazil). Brazil Information System for Notifiable Diseases 2007.                                                                                                                                                                                                                                                                                                                                                                | Country   | 2007      | Epi surveillance      |
| Visceral leishmaniasis | Ministry of Health (Brazil). Brazil Information System for Notifiable Diseases 2004.                                                                                                                                                                                                                                                                                                                                                                | Country   | 2004      | Epi surveillance      |
| Visceral leishmaniasis | Ministry of Health (Brazil). Brazil Information System for Notifiable Diseases 2003.                                                                                                                                                                                                                                                                                                                                                                | Country   | 2003      | Epi surveillance      |
| Visceral leishmaniasis | Ministry of Health (Brazil). Brazil Information System for Notifiable Diseases 2002.                                                                                                                                                                                                                                                                                                                                                                | Country   | 2002      | Epi surveillance      |
| Visceral leishmaniasis | Ministry of Health (Brazil). Brazil Information System for Notifiable Diseases 2001.                                                                                                                                                                                                                                                                                                                                                                | Country   | 2000-2001 | Epi surveillance      |
| Visceral leishmaniasis | Ministry of Health (Brazil). Brazil Information System for Notifiable Diseases 2009.                                                                                                                                                                                                                                                                                                                                                                | Country   | 2009      | Epi surveillance      |
| Visceral leishmaniasis | areas for surveillance and control in a visceral leishmaniasis endemic area in Brazil. . 2014; 56-62.                                                                                                                                                                                                                                                                                                                                               |           | 2005      | Scientific literature |
| Visceral leishmaniasis | World Health Organization (WHO). Brazil WHO Leishmaniasis Country Profile 1984-2010.                                                                                                                                                                                                                                                                                                                                                                | Country   | 1984-1997 | Epi surveillance      |
| Visceral leishmaniasis | Souza VAF de, Cortez LRP de B, Dias RA, Amaku M, Ferreira Neto JS, Kuroda RB dos S, Ferreira F. Space-time cluster analysis of American visceral leishmaniasis in Bauru, São Paulo State, Brazil. . 2012; 28(10): 1949-64.                                                                                                                                                                                                                          |           | 2003-2007 | Scientific literature |
| Visceral leishmaniasis | Ministry of Health (Brazil). Brazil Information System for Notifiable Diseases 2005.                                                                                                                                                                                                                                                                                                                                                                | Country   | 2005      | Epi surveillance      |
| Visceral leishmaniasis | Barata RA, Peixoto JC, Tanure A, Gomes ME, Apolinário EC, Bodevan EC, de Araújo HS, Dias ES, Pinheiro Ada C. Epidemiology of visceral leishmaniasis in a reemerging focus of intense transmission in Minas Gerais State, Brazil. . 2013; 405083.                                                                                                                                                                                                    | Country   | 2009      | Scientific literature |
| Visceral leishmaniasis | Ministry of Health (Brazil). Brazil Information System for Notifiable Diseases 2011.                                                                                                                                                                                                                                                                                                                                                                | Country   | 2011      | Epi surveillance      |
| Visceral leishmaniasis | World Health Organization (WHO). WHO Global Health Observatory Interactive Graph - Number of Cases of Visceral Leishmaniasis Reported 2005. Geneva, Switzerland: World Health Organization (WHO).                                                                                                                                                                                                                                                   | Global    | 2005      | Epi surveillance      |
| Visceral leishmaniasis | World Health Organization (WHO). WHO Global Health Observatory Interactive Graph - Number of Cases of Visceral Leishmaniasis Reported 2013. Geneva, Switzerland: World Health Organization (WHO).                                                                                                                                                                                                                                                   | Global    | 2013      | Epi surveillance      |
| Visceral leishmaniasis | World Health Organization (WHO). WHO Global Health Observatory Interactive Graph - Number of Cases of Visceral Leishmaniasis Reported 2012. Geneva, Switzerland: World Health Organization (WHO).                                                                                                                                                                                                                                                   | Global    | 2012      | Epi surveillance      |
| Visceral leishmaniasis | World Health Organization (WHO). WHO Global Health Observatory Interactive Graph - Number of Cases of Visceral Leishmaniasis Reported 2011. Geneva, Switzerland: World Health Organization (WHO).                                                                                                                                                                                                                                                   | Global    | 2011      | Epi surveillance      |
| Visceral leishmaniasis | World Health Organization (WHO). WHO Global Health Observatory Interactive Graph - Number of Cases of Visceral Leishmaniasis Reported 2010. Geneva, Switzerland: World Health Organization (WHO).                                                                                                                                                                                                                                                   | Global    | 2010      | Epi surveillance      |
| Visceral leishmaniasis | World Health Organization (WHO). WHO Global Health Observatory Interactive Graph - Number of Cases of Visceral Leishmaniasis Reported 2009. Geneva, Switzerland: World Health Organization (WHO).                                                                                                                                                                                                                                                   | Global    | 2009      | Epi surveillance      |
| Visceral leishmaniasis | World Health Organization (WHO). WHO Global Health Observatory Interactive Graph - Number of Cases of Visceral Leishmaniasis Reported 2008. Geneva, Switzerland: World Health Organization (WHO).                                                                                                                                                                                                                                                   | Global    | 2008      | Epi surveillance      |
| Visceral leishmaniasis | World Health Organization (WHO). WHO Global Health Observatory Interactive Graph - Number of Cases of Visceral Leishmaniasis Reported 2007. Geneva, Switzerland: World Health Organization (WHO).                                                                                                                                                                                                                                                   | Global    | 2007      | Epi surveillance      |
| Visceral leishmaniasis | World Health Organization (WHO). WHO Global Health Observatory Interactive Graph - Number of Cases of Visceral Leishmaniasis Reported 2006. Geneva, Switzerland: World Health Organization (WHO).                                                                                                                                                                                                                                                   | Global    | 2006      | Epi surveillance      |
| Visceral leishmaniasis | World Health Organization (WHO). WHO Global Health Observatory Interactive Graph - Number of Cases of Visceral Leishmaniasis Reported 2004. Geneva, Switzerland: World Health Organization (WHO).                                                                                                                                                                                                                                                   | Global    | 2004      | Epi surveillance      |
| Visceral leishmaniasis | World Health Organization (WHO). WHO Global Health Observatory Interactive Graph - Number of Cases of Visceral Leishmaniasis Reported 2003. Geneva, Switzerland: World Health Organization (WHO).                                                                                                                                                                                                                                                   | Global    | 2003      | Epi surveillance      |
| Visceral leishmaniasis | World Health Organization (WHO). WHO Global Health Observatory Interactive Graph - Number of Cases of Visceral Leishmaniasis Reported 2001. Geneva, Switzerland: World Health Organization (WHO).                                                                                                                                                                                                                                                   | Global    | 2001      | Epi surveillance      |
| Visceral leishmaniasis | World Health Organization (WHO). WHO Global Health Observatory Interactive Graph - Number of Cases of Visceral Leishmaniasis Reported 2015. Geneva, Switzerland: World Health Organization (WHO).                                                                                                                                                                                                                                                   | Global    | 2015      | Epi surveillance      |
| Visceral leishmaniasis | World Health Organization (WHO). WHO Global Health Observatory Interactive Graph - Number of Cases of Visceral Leishmaniasis Reported 2000. Geneva, Switzerland: World Health Organization (WHO).                                                                                                                                                                                                                                                   | Global    | 2000      | Epi surveillance      |
| Visceral leishmaniasis | World Health Organization (WHO). WHO Global Health Observatory Interactive Graph - Number of Cases of Visceral Leishmaniasis Reported 1998. Geneva, Switzerland: World Health Organization (WHO).                                                                                                                                                                                                                                                   | Global    | 1998      | Epi surveillance      |
| Visceral leishmaniasis | Ministry of Health (Brazil). Brazil Information System for Notifiable Diseases 2010.                                                                                                                                                                                                                                                                                                                                                                | Country   | 2010      | Epi surveillance      |
| Visceral leishmaniasis | World Health Organization (WHO). WHO Global Health Observatory Interactive Graph - Number of Cases of Cutaneous Leishmaniasis Reported 2008. Geneva, Switzerland: World Health Organization (WHO).                                                                                                                                                                                                                                                  | Global    | 2002      | Epi surveillance      |
| Visceral leishmaniasis | Piggott DM, Bhatt S, Golding N, Duda KA, Battle KE, Brady OJ, Messina JP, Balard Y, Bastien P, Pratlong F, Brownstein JS, Freifeld CC, Mekar SR, Gething PW, George DB, Myers MF, Rethinger R, Hay SI. Global distribution maps of the leishmaniases. . 2014; 3: nan.                                                                                                                                                                               |           | 1980-2016 | Scientific literature |



|                                           |                                                                                                                                                                                                                                                                                                                                  |           |           |                       |
|-------------------------------------------|----------------------------------------------------------------------------------------------------------------------------------------------------------------------------------------------------------------------------------------------------------------------------------------------------------------------------------|-----------|-----------|-----------------------|
| Visceral leishmaniasis                    | Brazilian Institute of Geography and Statistics (IBGE), Ministry of Health (Brazil), Ministry of Planning, Budget, and Management (Brazil). Brazil National Health Survey 2013. Rio de Janeiro, Brazil: Brazilian Institute of Geography and Statistics (IBGE).                                                                  | Country   | 2013-2014 | Survey                |
| Visceral leishmaniasis                    | World Health Organization (WHO). Brazil WHO Leishmaniasis Country Profile 2014. Geneva, Switzerland: World Health Organization (WHO), 2016.                                                                                                                                                                                      | Country   | 2014      | Epi surveillance      |
| Visceral leishmaniasis                    | Ministry of Health (Brazil). Brazil Information System for Notifiable Diseases 2015.                                                                                                                                                                                                                                             | Country   | 2015-2016 | Epi surveillance      |
| Visceral leishmaniasis                    | Ministry of Health (Brazil). Brazil Information System for Notifiable Diseases 2014.                                                                                                                                                                                                                                             | Country   | 2014      | Epi surveillance      |
| Visceral leishmaniasis                    | Ministry of Health (Brazil). Brazil Information System for Notifiable Diseases 2006.                                                                                                                                                                                                                                             | Country   | 2006      | Epi surveillance      |
| Visceral leishmaniasis                    | Brazil World Health Survey 2003                                                                                                                                                                                                                                                                                                  | Country   | 2002-2003 | Survey                |
| Visceral leishmaniasis                    | Ministry of Health (Brazil). Brazil Information System for Notifiable Diseases 2012.                                                                                                                                                                                                                                             | Country   | 2012      | Epi surveillance      |
| Visceral leishmaniasis                    | World Health Organization (WHO). WHO Global Health Observatory Interactive Graph - Number of Cases of Visceral Leishmaniasis Reported 1999. Geneva, Switzerland: World Health Organization (WHO).                                                                                                                                | Global    | 1999      | Epi surveillance      |
| Visceral leishmaniasis                    | Ministry of Health (Brazil). Brazil Information System for Notifiable Diseases 2013.                                                                                                                                                                                                                                             | Country   | 2013      | Epi surveillance      |
| Cutaneous and mucocutaneous leishmaniasis | Ministry of Health (Brazil). Brazil Information System for Notifiable Diseases 2010.                                                                                                                                                                                                                                             | Country   | 2010      | Epi surveillance      |
| Cutaneous and mucocutaneous leishmaniasis | Brazil World Health Survey 2003                                                                                                                                                                                                                                                                                                  | Country   | 2002-2003 | Survey                |
| Cutaneous and mucocutaneous leishmaniasis | World Health Organization (WHO). WHO Global Health Observatory Interactive Graph - Number of Cases of Cutaneous Leishmaniasis Reported 2015. Geneva, Switzerland: World Health Organization (WHO).                                                                                                                               | Global    | 2015      | Epi surveillance      |
| Cutaneous and mucocutaneous leishmaniasis | World Health Organization (WHO). WHO Global Health Observatory Interactive Graph - Number of Cases of Cutaneous Leishmaniasis Reported 2013. Geneva, Switzerland: World Health Organization (WHO).                                                                                                                               | Global    | 2013      | Epi surveillance      |
| Cutaneous and mucocutaneous leishmaniasis | Brazilian Institute of Geography and Statistics (IBGE), Ministry of Health (Brazil), Ministry of Planning, Budget, and Management (Brazil). Brazil National Health Survey 2013. Rio de Janeiro, Brazil: Brazilian Institute of Geography and Statistics (IBGE).                                                                  | Country   | 2013-2014 | Survey                |
| Cutaneous and mucocutaneous leishmaniasis | World Health Organization (WHO). WHO Global Health Observatory Interactive Graph - Number of Cases of Cutaneous Leishmaniasis Reported 2004. Geneva, Switzerland: World Health Organization (WHO).                                                                                                                               | Global    | 2004      | Epi surveillance      |
| Cutaneous and mucocutaneous leishmaniasis | World Health Organization (WHO). WHO Global Health Observatory Interactive Graph - Number of Cases of Cutaneous Leishmaniasis Reported 2010. Geneva, Switzerland: World Health Organization (WHO).                                                                                                                               | Global    | 2010      | Epi surveillance      |
| Cutaneous and mucocutaneous leishmaniasis | World Health Organization (WHO). WHO Global Health Observatory Interactive Graph - Number of Cases of Cutaneous Leishmaniasis Reported 2011. Geneva, Switzerland: World Health Organization (WHO).                                                                                                                               | Global    | 2011      | Epi surveillance      |
| Cutaneous and mucocutaneous leishmaniasis | Ministry of Health (Brazil). Brazil Information System for Notifiable Diseases 2013.                                                                                                                                                                                                                                             | Country   | 2013      | Epi surveillance      |
| Cutaneous and mucocutaneous leishmaniasis | World Health Organization (WHO). WHO Global Health Observatory Interactive Graph - Number of Cases of Cutaneous Leishmaniasis Reported 2012. Geneva, Switzerland: World Health Organization (WHO).                                                                                                                               | Global    | 2012      | Epi surveillance      |
| Cutaneous and mucocutaneous leishmaniasis | World Health Organization (WHO). WHO Global Health Observatory Interactive Graph - Number of Cases of Cutaneous Leishmaniasis Reported 2003. Geneva, Switzerland: World Health Organization (WHO).                                                                                                                               | Global    | 2003      | Epi surveillance      |
| Cutaneous and mucocutaneous leishmaniasis | Ministry of Health (Brazil). Brazil Information System for Notifiable Diseases 2007.                                                                                                                                                                                                                                             | Country   | 2007      | Epi surveillance      |
| Cutaneous and mucocutaneous leishmaniasis | Ministry of Health (Brazil). Brazil Information System for Notifiable Diseases 2012.                                                                                                                                                                                                                                             | Country   | 2012      | Epi surveillance      |
| Cutaneous and mucocutaneous leishmaniasis | World Health Organization (WHO). Brazil WHO Leishmaniasis Country Profile 2014. Geneva, Switzerland: World Health Organization (WHO), 2016.                                                                                                                                                                                      | Country   | 2014      | Epi surveillance      |
| Cutaneous and mucocutaneous leishmaniasis | World Health Organization (WHO). Brazil WHO Leishmaniasis Country Profile 1984-2010. Guerra JA, Maciel MG, Guerra MV, Talhari AC, Prestes SR, Fernandes MA, Da-Cruz AM, Martins A, Coelho LJ, Romero GA, Barbosa Md. Tegumentary leishmaniasis in the State of Amazonas: what have we learned and what do we need? . 2015; 12-9. | Country   | 1989-2010 | Epi surveillance      |
| Cutaneous and mucocutaneous leishmaniasis | Fonseca Eda S, D'Andrea LA, Taniguchi HH, Hiramoto RM, Tolezano JE, Guimarães RB. Spatial epidemiology of American cutaneous leishmaniasis in a municipality of west São Paulo State, Brazil. . 2014; 51(4): 271-5.                                                                                                              |           | 1981-2006 | Scientific literature |
| Cutaneous and mucocutaneous leishmaniasis | World Health Organization (WHO). WHO Global Health Observatory Interactive Graph - Number of Cases of Cutaneous Leishmaniasis Reported 1998. Geneva, Switzerland: World Health Organization (WHO).                                                                                                                               | Global    | 1998-2011 | Scientific literature |
| Cutaneous and mucocutaneous leishmaniasis | World Health Organization (WHO). WHO Global Health Observatory Interactive Graph - Number of Cases of Cutaneous Leishmaniasis Reported 1999. Geneva, Switzerland: World Health Organization (WHO).                                                                                                                               | Global    | 1999      | Epi surveillance      |
| Cutaneous and mucocutaneous leishmaniasis | Ministry of Health (Brazil). Brazil Information System for Notifiable Diseases 2011.                                                                                                                                                                                                                                             | Country   | 2011      | Epi surveillance      |
| Cutaneous and mucocutaneous leishmaniasis | World Health Organization (WHO). WHO Global Health Observatory Interactive Graph - Number of Cases of Cutaneous Leishmaniasis Reported 2005. Geneva, Switzerland: World Health Organization (WHO).                                                                                                                               | Global    | 2005      | Epi surveillance      |
| Cutaneous and mucocutaneous leishmaniasis | World Health Organization (WHO). WHO Global Health Observatory Interactive Graph - Number of Cases of Cutaneous Leishmaniasis Reported 2008. Geneva, Switzerland: World Health Organization (WHO).                                                                                                                               | Global    | 2008      | Epi surveillance      |
| Cutaneous and mucocutaneous leishmaniasis | Ministry of Health (Brazil). Brazil Information System for Notifiable Diseases 2009.                                                                                                                                                                                                                                             | Country   | 2009      | Epi surveillance      |
| Cutaneous and mucocutaneous leishmaniasis | World Health Organization (WHO). WHO Global Health Observatory Interactive Graph - Number of Cases of Cutaneous Leishmaniasis Reported 2006. Geneva, Switzerland: World Health Organization (WHO).                                                                                                                               | Global    | 2006      | Epi surveillance      |
| Cutaneous and mucocutaneous leishmaniasis | World Health Organization (WHO). WHO Global Health Observatory Interactive Graph - Number of Cases of Cutaneous Leishmaniasis Reported 2007. Geneva, Switzerland: World Health Organization (WHO).                                                                                                                               | Global    | 2007-2014 | Epi surveillance      |
| Cutaneous and mucocutaneous leishmaniasis | World Health Organization (WHO). WHO Global Health Observatory Interactive Graph - Number of Cases of Cutaneous Leishmaniasis Reported 2009. Geneva, Switzerland: World Health Organization (WHO).                                                                                                                               | Global    | 2009      | Epi surveillance      |
| Cutaneous and mucocutaneous leishmaniasis | Health Institute (São Paulo, Brazil), State University of Campinas, São Paulo Municipal Health Department, São Paulo State University, University of São Paulo. Brazil - São Paulo Health Survey 2008-2009.                                                                                                                      | São Paulo | 2002-2008 | Survey                |
| Cutaneous and mucocutaneous leishmaniasis | World Health Organization (WHO). WHO Global Health Observatory Interactive Graph - Number of Cases of Cutaneous Leishmaniasis Reported 2001. Geneva, Switzerland: World Health Organization (WHO).                                                                                                                               | Global    | 2001      | Epi surveillance      |
| Cutaneous and mucocutaneous leishmaniasis | World Health Organization (WHO). WHO Global Health Observatory Interactive Graph - Number of Cases of Cutaneous Leishmaniasis Reported 2002. Geneva, Switzerland: World Health Organization (WHO).                                                                                                                               | Global    | 2002      | Epi surveillance      |
| Cutaneous and mucocutaneous leishmaniasis | World Health Organization (WHO). WHO Global Health Observatory Interactive Graph - Number of Cases of Cutaneous Leishmaniasis Reported 2000. Geneva, Switzerland: World Health Organization (WHO).                                                                                                                               | Global    | 2000      | Epi surveillance      |
| Cutaneous and mucocutaneous leishmaniasis | Ministry of Health (Brazil). Brazil Information System for Notifiable Diseases 2008.                                                                                                                                                                                                                                             | Country   | 2008      | Epi surveillance      |
| Schistosomiasis                           | GGL, Loverde PT, Correa-Oliveira R, Gazzinelli A. Schistosoma mansoni infection in a rural area of the Jequitinhonha Valley, Minas Gerais, Brazil: analysis of exposure risk. . 2010; 113(1): 34#1.                                                                                                                              |           | 2001      | Scientific literature |
| Schistosomiasis                           | Gomes EC de S, Barbosa CS. Spatial pattern, water use and risk levels associated with the transmission of schistosomiasis on the north coast of Pernambuco, Brazil. . 2010; 26(5): 1013#3.                                                                                                                                       |           | 2006-2007 | Scientific literature |
| Schistosomiasis                           | Barbosa CS, Favre TC, Wanderley TN, Callou AC, Pieri OS. Assessment of schistosomiasis, through school surveys, in the Forest Zone of Pernambuco, Brazil. . 2006; 101 Suppl 1: 55#2.                                                                                                                                             |           | 2004      | Scientific literature |
| Schistosomiasis                           | Guimarães ICS, Tavares-Neto J. [Urban transmission of schistosomiasis in children from a neighborhood of Salvador, Bahia]. . 2006; 39(5): 451#.                                                                                                                                                                                  |           | 2004      | Scientific literature |
| Schistosomiasis                           | Moura EC, Bragazza LM, Coelho MF, Aun SM. [Prevalence of intestinal parasitosis in schoolchildren]. . 1997; 73(6): 406#0.                                                                                                                                                                                                        |           | 1994-1995 | Scientific literature |
| Schistosomiasis                           | Soares MS, Barreto MG, da Silva CL, Pereira JB, Moza PG, Rey L, Calçado MS, Lustoza A, Maspero R. Schistosomiasis in a low prevalence area: incomplete urbanization increasing risk of infection in Paracambi, RJ, Brazil. . 1995; 90(4): 451#.                                                                                  |           | 1990-1991 | Scientific literature |
| Schistosomiasis                           | Tashima NT, Simões M.S. Enteroparasitic occurrence in fecal samples analyzed at the University of Western São Paulo-UNOESTE Clinical Laboratory, Presidente Prudente, São Paulo state, Brazil. . 2004; 46(5): 243#.                                                                                                              |           | 2001      | Scientific literature |
| Schistosomiasis                           | Perez E, Gazin P, Furtado A, Miranda P, Marques NM, Silva MR, Varela R. [Intestinal parasite infections and schistosomiasis in a poor urban area, in townships of the sugar cane belt and in villages of the semi-arid area of North-East Brazil]. . 2000; 10(2): 127#.                                                          |           | 1993-1998 | Scientific literature |
| Schistosomiasis                           | MCND, Freire RL, De Freitas JC, Santana MAZ, Navarro IT. Occurrence of enteroparasitosis in schoolchildren of the municipal district of Jataizinho, State of Paraná, Brazil. . 2006; 28(2): 107#1.                                                                                                                               |           | 2004      | Scientific literature |
| Schistosomiasis                           | London School of Hygiene and Tropical Medicine. Global Atlas of Helminth Infections - Schistosomiasis. London, United Kingdom: London School of Hygiene and Tropical Medicine. Institute for Health Metrics and Evaluation (IHME). IHME GBD Schistosomiasis DisMod                                                               | Global    | 1995-2005 | Estimate              |
| Schistosomiasis                           | Prevalence Estimates.                                                                                                                                                                                                                                                                                                            | Global    | 1990-2016 | Modeled data          |

|                       |                                                                                                                                                                                                                                                                                                                                                                  |           |           |                       |
|-----------------------|------------------------------------------------------------------------------------------------------------------------------------------------------------------------------------------------------------------------------------------------------------------------------------------------------------------------------------------------------------------|-----------|-----------|-----------------------|
| Schistosomiasis       | Institute for Health Metrics and Evaluation (IHME). IHME GBD Custom Model Estimates of Schistosomiasis Remission.                                                                                                                                                                                                                                                | Global    | 2010-2012 | Modeled data          |
| Schistosomiasis       | Bethony J, Williams JT, Kloos H, Blangero J, Alves-Fraga L, Buck G, Michalek A, Williams-Blangero S, Loverde PT, Corrêa-Oliveira R, Gazzinelli A. Exposure to Schistosoma mansoni infection in a rural area in Brazil. II: household risk factors. . 2001; 6(2): 136-45.                                                                                         |           | 1999      | Scientific literature |
| Schistosomiasis       | the examination of compressed fecal samples for Schistosoma mansoni eggs. . 2003; 36(4): 503-7.                                                                                                                                                                                                                                                                  |           | 1998-2000 | Scientific literature |
| Schistosomiasis       | Maranhense State of Maranhão, Brazil: cross-sectional studies performed in 1987 and 1993. . 1998; 40(3): 165-71.                                                                                                                                                                                                                                                 |           | 1987-1993 | Scientific literature |
| Schistosomiasis       | Guimarães MD, de Barros HL, Katz N. A clinical epidemiologic study in a schistosomiasis mansoni endemic area (Tuparecê, Minas Gerais). . 1985; 27(3): 123-31.                                                                                                                                                                                                    |           | 1984-1985 | Scientific literature |
| Schistosomiasis       | Rodrigues RN, Murta C, Teixeira Júnior MA, Cury GC, Rocha MO. Clinical-epidemiologic study of schistosomiasis mansoni in Ponte do Pasmado, a village in the municipality of Itinga, state of Minas Gerais, Brazil, 1992. . 1995; 37(1): 81-8.                                                                                                                    |           | 1992      | Scientific literature |
| Schistosomiasis       | Coutinho E, Barbosa FS, Barbosa JM, Pessoa P, Pinto RF, Oliveira PA, Rodrigues BA. Inquérito clínico-nutricional e antropométrico preliminar, em áreas endêmicas de esquistossomose mansônica, no Nordeste do Brasil. . 1972; 6: 211-36.                                                                                                                         |           | 1965-1967 | Scientific literature |
| Schistosomiasis       | Assis AMO, Prado MS, Barreto ML, Reis MG, Conceição Pinheiro SM, Parraga IM, Blanton RE. Childhood stunting in Northeast Brazil: the role of Schistosoma mansoni infection and inadequate dietary intake. . 2004; 58(7): 1022-9.                                                                                                                                 |           | 2004      | Scientific literature |
| Schistosomiasis       | Assis AM, Barreto ML, Prado MS, Reis MG, Parraga IM, Blanton RE. Schistosoma mansoni infection and nutritional status in schoolchildren: a randomized, double-blind trial in northeastern Brazil. . 1998; 68(6): 1247-53.                                                                                                                                        |           | 1992-1993 | Scientific literature |
| Schistosomiasis       | Teixeira-Carvalho A, Siveira AMS. Effect of chemotherapy with praziquantel on the production of cytokines and morbidity associated with schistosomiasis mansoni. . 2008; 52(8): 2780-6.                                                                                                                                                                          |           | 2006      | Scientific literature |
| Schistosomiasis       | Coutinho EM, Abath FG, Barbosa CS, Domingues AL, Melo MC, Montenegro SM, Lucena MA, Romani SA, Souza WV, Coutinho AD. Factors involved in Schistosoma mansoni infection in rural areas of northeast Brazil. . 1997; 92(5): 707-15.                                                                                                                               |           | 1994-1995 | Scientific literature |
| Schistosomiasis       | TAKEUCHI T. PARASITOLOGICAL AND SEROLOGICAL STUDIES ON AMEBIASIS AND OTHER INTESTINAL PARASITIC INFECTIONS IN THE RURAL SECTOR AROUND RECIFE, NORTHEAST BRAZIL. . 1990; 32(6): 428-35.                                                                                                                                                                           |           | 1989      | Scientific literature |
| Schistosomiasis       | Kloetzel K, Chieffi PP, de Siqueira JG. Repeated mass treatment of schistosomiasis mansoni: experience in hyperendemic areas of Brazil. 3. Techniques for assessment and surveillance. . 1990; 84(1): 74-9.                                                                                                                                                      |           | 1987-1990 | Scientific literature |
| Schistosomiasis       | infection with Schistosoma mansoni in a rural community in northeast Brazil. . 1976; 25(2): 285-94.                                                                                                                                                                                                                                                              |           | 1972      | Scientific literature |
| Schistosomiasis       | differences in growth of school-aged children with schistosomiasis and geohelminth infection. . 1996; 55(2): 150-6.                                                                                                                                                                                                                                              |           | 1992      | Scientific literature |
| Schistosomiasis       | Brito LL, Barreto ML, Silva RDCR, Assis AMO, Reis MG, Parraga IM, Blanton RE. Moderate- and low-intensity co-infections by intestinal helminths and Schistosoma mansoni, dietary iron intake, and anemia in Brazilian children. . 2006; 75(5): 939-44.                                                                                                           |           | 1997      | Scientific literature |
| Schistosomiasis       | measures in relation to Schistosomiasis mansoni and socioeconomic variables. . 1988; 17(4): 880-6.                                                                                                                                                                                                                                                               |           | 1981      | Scientific literature |
| Schistosomiasis       | De Lima e Costa MF, Rocha RS, Colley D, Gazzinelli G, Katz N. Validity of selected clinical signs and symptoms in diagnosis of Schistosoma mansoni infection. . 1991; 33(1): 12-7.                                                                                                                                                                               |           | 1986      | Scientific literature |
| Schistosomiasis       | sociodemographic characteristics and water contact patterns predictive of infection. . 1996; 25(6): 1292-300.                                                                                                                                                                                                                                                    |           | 1991-1992 | Scientific literature |
| Schistosomiasis       | Gonçalves EM do N, Chieffi PP, Luna EJ de A, Pinho JRR, Carrilho FJ, Gryschek RCB. Comparative Study of the Accuracy of Different Techniques for the Laboratory Diagnosis of Schistosomiasis Mansoni in Areas of Low Endemicity in Barra Mansa City, Rio de Janeiro State, Brazil. . 2015; 2015: 135689.                                                         |           | 2011      | Scientific literature |
| Schistosomiasis       | Palmeira DCC, Carvalho AG de, Rodrigues K, Couto JLA. [Prevalence of Schistosoma mansoni infection in two municipalities of the State of Alagoas, Brazil]. . 2010; 43(3): 313-2.                                                                                                                                                                                 |           | 2009      | Scientific literature |
| Schistosomiasis       | Proietti FA, Paulino UH, Chiari CA, Proietti AB, Antunes CM. Epidemiology of Schistosoma mansoni infection in a low-endemic area in Brazil: clinical and nutritional characteristics. . 1992; 34(5): 409-19.                                                                                                                                                     |           | 1990-1992 | Scientific literature |
| Schistosomiasis       | Brito LL, Barreto ML, Silva Rde C, Assis AM, Reis MG, Parraga I, Blanton RE. [Risk factors for iron-deficiency anemia in children and adolescents with intestinal helminthic infections]. . 2003; 14(6): 422-31.                                                                                                                                                 |           | 2002      | Scientific literature |
| Schistosomiasis       | Enk MJ, Lima ACL, Massara CL, Coelho PMZ, Schall VT. A combined strategy to improve the control of Schistosoma mansoni in areas of low prevalence in Brazil. . 2008; 78(1): 140-8.                                                                                                                                                                               |           | 2005-2006 | Scientific literature |
| Schistosomiasis       | Schistosoma mansoni egg count in an hyperendemic area in the State of Minas Gerais. . 1985; 27(2): 66-75.                                                                                                                                                                                                                                                        |           | 1984-1985 | Scientific literature |
| Schistosomiasis       | Chitsulo L, Engels D, Montresor A, Savioli L. The global status of schistosomiasis and its control. . 2000; 77(1): 41-51.                                                                                                                                                                                                                                        | Global    | 1990-2016 | Scientific literature |
| Cysticercosis         | Valença MM, Valença LP. [Etiology of the epileptic seizures in Recife city, Brazil: study of 249 patients]. . 2000; 58(4): 1064-2.                                                                                                                                                                                                                               | Country   | 1987-1990 | Scientific literature |
| Cysticercosis         | Calcified cysticercotic lesions and intractable epilepsy: a cross sectional study of 512 patients Ministry of Health (Brazil). Brazil Hospital Information System 1997. Rio de Janeiro, Brazil: Ministry of Health (Brazil).                                                                                                                                     | Country   | 2003      | Scientific literature |
| Cystic echinococcosis | Health Institute (São Paulo, Brazil), State University of Campinas, São Paulo Municipal Health Department, São Paulo State University, University of São Paulo. Brazil - São Paulo Health Survey 2008-2009.                                                                                                                                                      | São Paulo | 1993-1997 | Administrative record |
| Cystic echinococcosis | Ministry of Health (Brazil). Brazil Hospital Information System 2013-2014.                                                                                                                                                                                                                                                                                       |           | 2002-2008 | Survey                |
| Cystic echinococcosis | Ministry of Health (Brazil). Brazil Hospital Information System 2008-2012.                                                                                                                                                                                                                                                                                       |           | 2013-2017 | Administrative record |
| Cystic echinococcosis | Brazilian Institute of Geography and Statistics (IBGE), Ministry of Health (Brazil), Ministry of Planning, Budget, and Management (Brazil). Brazil National Survey 2013. Rio de Janeiro, Brazil: Brazilian Institute of Geography and Statistics (IBGE).                                                                                                         | Country   | 2008-2012 | Administrative record |
| Cystic echinococcosis | Ministry of Health (Brazil). Brazil Hospital Information System 2003-2007.                                                                                                                                                                                                                                                                                       |           | 2013-2014 | Survey                |
| Cystic echinococcosis | Ministry of Health (Brazil). Brazil Hospital Information System 1998-2002.                                                                                                                                                                                                                                                                                       |           | 2003-2007 | Administrative record |
| Cystic echinococcosis | Cystic Echinococcosis Endemicity Estimates                                                                                                                                                                                                                                                                                                                       | Global    | 1998-2002 | Administrative record |
| Cystic echinococcosis | Brazil World Health Survey 2003                                                                                                                                                                                                                                                                                                                                  | Global    | 1980-2015 | Scientific literature |
| Cystic echinococcosis | Institute for Health Metrics and Evaluation (IHME). IHME GBD Custom Model Estimates of Lymphatic Filariasis Remission.                                                                                                                                                                                                                                           | Country   | 2002-2003 | Survey                |
| Lymphatic filariasis  | Institute for Health Metrics and Evaluation (IHME). IHME GBD Lymphatic Filariasis DisMod Prevalence Estimates.                                                                                                                                                                                                                                                   | Global    | 2003-2016 | Modeled data          |
| Lymphatic filariasis  | Netto MJ, Bonfim C, Brandao E, Aguiar-Santos AM, Medeiros Z. Burden of lymphatic filariasis morbidity in an area of low endemicity in Brazil. . 2016; 163: 54-60.                                                                                                                                                                                                | Global    | 1990-2016 | Modeled data          |
| Lymphatic filariasis  | Brandao E, Bonfim C, Alves A, Oliveira C, Montenegro CE, Costa T, Maciel A, Medeiros Z. Lymphatic filariasis among children and adolescents: spatial identification via socio-environmental indicators to define priority areas for elimination. . 2015; 7(5): 324-31.                                                                                           |           | 2015      | Scientific literature |
| Lymphatic filariasis  | World Health Organization (WHO). WHO PCT Databank - Lymphatic Filariasis. Geneva, Switzerland: World Health Organization (WHO).                                                                                                                                                                                                                                  |           | 2014      | Scientific literature |
| Lymphatic filariasis  | Shriram AN, Krishnamoorthy K, Sivan A, Saha BP, Kumaraswami V, Vijayachari P. Impact of MDA and the prospects of elimination of the lone focus of diurnally sub periodic lymphatic filariasis in Nicobar Islands, India. . 2014; 93-7.                                                                                                                           | Global    | 1990-2016 | Epi surveillance      |
| Lymphatic filariasis  | Medeiros Z, Alves A, Brito JA, Borba L, Santos Z, Costa JP, do Espírito Santo ME, Netto MJE. The present situation regarding lymphatic filariasis in Cabo de Santo Agostinho, Pernambuco, Northeast Brazil. . 2006; 48(5): 263-7.                                                                                                                                |           | 2011      | Scientific literature |
| Lymphatic filariasis  | Lymphatic Filariasis. London, United Kingdom: London School of Hygiene and Tropical Medicine.                                                                                                                                                                                                                                                                    | Global    | 2000      | Scientific literature |
| Lymphatic filariasis  | Survey of Bancroftian filariasis infection in humans and Culex mosquitoes in the western Brazilian Amazon region: implications for transmission and control as it appears in London School of Hygiene and Tropical Medicine. Global Atlas of Helminth Infections - Lymphatic Filariasis. London, United Kingdom: London School of Hygiene and Tropical Medicine. |           | 1990-2015 | Epi surveillance      |
| Lymphatic filariasis  | Korte RL, Fontes G, Camargo Jde S, Rocha EM, Araújo EA, Oliveira MZ, Santos RV, Camargo LM. Survey of Bancroftian filariasis infection in humans and Culex mosquitoes in the western Brazilian Amazon region: implications for transmission and control. . 2013; 46.0(2): 214-20.                                                                                |           | 2008-2009 | Scientific literature |
| Lymphatic filariasis  | It appears in London School of Hygiene and Tropical Medicine. Global Atlas of Helminth Infections - Lymphatic Filariasis. London, United Kingdom: London School of Hygiene and Tropical Medicine.                                                                                                                                                                |           | 2008-2009 | Scientific literature |
| Lymphatic filariasis  | Aguiar-Santos AM, Medeiros Z, Bonfim C, Rocha AC, Brandão E, Miranda T, Oliveira P, Sarinho ESC. Epidemiological assessment of neglected diseases in children: lymphatic filariasis and soil-transmitted helminthiasis. . 2013; 89(3): 250-5.                                                                                                                    |           | 2007-2010 | Scientific literature |
| Lymphatic filariasis  |                                                                                                                                                                                                                                                                                                                                                                  |           | 2009-2010 | Scientific literature |

|                      |                                                                                                                                                                                                                                                                                                                                            |           |           |                       |
|----------------------|--------------------------------------------------------------------------------------------------------------------------------------------------------------------------------------------------------------------------------------------------------------------------------------------------------------------------------------------|-----------|-----------|-----------------------|
| Lymphatic filariasis | Braga C, de Albuquerque MF, Schindler H, Rezende A, Maciel A, Silva MC, Furtado A, de Carvalho AB, Lapa T, Ximenes RA. [Epidemiological pattern of lymphatic filariasis in children living in endemic areas]. . 1997; 73(2): 95-100.                                                                                                       |           | 1990-1991 | Scientific literature |
| Lymphatic filariasis | Fontes G, Rocha EM, Brito AC, Antunes CM. Lymphatic filariasis in Brazilian urban area (Maceió, Alagoas). . 1998; 93(6): 705-10.                                                                                                                                                                                                           |           | 1992-1995 | Scientific literature |
| Lymphatic filariasis | A. Epidemiological study of bancroftian filariasis in Recife, northeastern Brazil. . 1996; 91(4): 449-55.                                                                                                                                                                                                                                  |           | 1991      | Scientific literature |
| Lymphatic filariasis | Medeiros Z, Oliveira C, Quaresma J, Barbosa E, Aguiar-Santos AM, Bonfim C, Almeida J, Lessa F. Lymphatic filariasis in Moreno, Northeast Brazil. . 2004; 7(1): 73-9.                                                                                                                                                                       |           | 2001-2003 | Scientific literature |
| Lymphatic filariasis | Brazil as it appears in London School of Hygiene and Tropical Medicine. Global Atlas of Helminth Infections - Lymphatic Filariasis. London, United Kingdom: London School of Hygiene and Tropical Medicine.                                                                                                                                |           | 2000-2002 | Scientific literature |
| Lymphatic filariasis | Oliveira P, Braga C, Alexander N, Brandão E, Silva A, Wanderley L, Aguiar AM, Diniz G, Medeiros Z, Rocha A. Evaluation of diagnostic tests for Wuchereria bancrofti infection in Brazilian schoolchildren. . 2014; 47.0(3): 359-66.                                                                                                        |           | 2007-2009 | Scientific literature |
| Lymphatic filariasis | Medeiros Z, Bonfim C, Alves A, Oliveira C, Netto MJE, Aguiar-Santos AM. The epidemiological delimitation of lymphatic filariasis in an endemic area of Brazil, 41 years after the first recorded case. . 2008; 102(6): 509-19.                                                                                                             |           | 2000-2002 | Scientific literature |
| Lymphatic filariasis | kernel density estimates to investigate lymphatic filariasis in northeast Brazil. . 2012; 106(2): 113-7.                                                                                                                                                                                                                                   |           | 2000-2002 | Scientific literature |
| Lymphatic filariasis | Bancroftian filariasis in two urban areas of Recife, Brazil: pre-control observations on infection and disease as it appears in London School of Hygiene and Tropical Medicine. Global Atlas of Helminth Infections - Lymphatic Filariasis. London, United Kingdom: London School of Hygiene and Tropical Medicine.                        |           | 1990-1991 | Scientific literature |
| Lymphatic filariasis | Brandão E, Bonfim C, Cabral D, Lima JL, Aguiar-Santos AM, Maciel A, Medeiros Z. Mapping of Wuchereria bancrofti infection in children and adolescents in an endemic area of Brazil. . 2011; 120(1-2): 151-4.                                                                                                                               |           | 2008-2010 | Scientific literature |
| Lymphatic filariasis | appears in London School of Hygiene and Tropical Medicine. Global Atlas of Helminth Infections - Lymphatic Filariasis. London, United Kingdom: London School of Hygiene and Tropical Medicine.                                                                                                                                             |           | 1991      | Scientific literature |
| Lymphatic filariasis | A socioenvironmental composite index as a tool for identifying urban areas at risk of lymphatic filariasis as it appears in London School of Hygiene and Tropical Medicine. Global Atlas of Helminth Infections - Lymphatic Filariasis. London, United Kingdom: London School of Hygiene and Tropical Medicine.                            |           | 2000-2002 | Scientific literature |
| Lymphatic filariasis | appears in London School of Hygiene and Tropical Medicine. Global Atlas of Helminth Infections - Lymphatic Filariasis. London, United Kingdom: London School of Hygiene and Tropical Medicine.                                                                                                                                             |           | 1993      | Scientific literature |
| Lymphatic filariasis | urban areas of Alagoas State, Northeast Brazil: study in the general population]. . 2000; 33(6): 545-51.                                                                                                                                                                                                                                   |           | 1997-1999 | Scientific literature |
| Lymphatic filariasis | [Bancroftian filariasis in urban areas of Alagoas State, Northeast Brazil: study in the general population] as it appears in London School of Hygiene and Tropical Medicine. Global Atlas of Helminth Infections - Lymphatic Filariasis. London, United Kingdom: London School of Hygiene and Tropical Medicine.                           |           | 1995-2000 | Scientific literature |
| Lymphatic filariasis | case of an endemic area in Jaboatão dos Guararapes, Pernambuco, Brazil] as it appears in London School of Hygiene and Tropical Medicine. Global Atlas of Helminth Infections - Lymphatic Filariasis. London, United Kingdom: London School of Hygiene and Tropical Medicine.                                                               |           | 2000-2002 | Scientific literature |
| Lymphatic filariasis | It appears in London School of Hygiene and Tropical Medicine. Global Atlas of Helminth Infections - Lymphatic Filariasis. London, United Kingdom: London School of Hygiene and Tropical Medicine.                                                                                                                                          |           | 1980-2003 | Scientific literature |
| Lymphatic filariasis | [Evaluation of a social and environmental indicator used in the identification of lymphatic filariasis transmission in urban centers] as it appears in London School of Hygiene and Tropical Medicine. Global Atlas of Helminth Infections - Lymphatic Filariasis. London, United Kingdom: London School of Hygiene and Tropical Medicine. |           | 1996-2001 | Scientific literature |
| Lymphatic filariasis | as it appears in London School of Hygiene and Tropical Medicine. Global Atlas of Helminth Infections - Lymphatic Filariasis. London, United Kingdom: London School of Hygiene and Tropical Medicine.                                                                                                                                       |           | 1991-2000 | Scientific literature |
| Lymphatic filariasis | Field evaluation of the whole blood immunochromatographic test for rapid bancroftian filariasis diagnosis in the northeast of Brazil as it appears in London School of Hygiene and Tropical Medicine. Global Atlas of Helminth Infections - Lymphatic Filariasis. London, United Kingdom: London School of Hygiene and Tropical Medicine.  |           | 1999      | Scientific literature |
| Onchocerciasis       | Banic DM, Calvão-Brito RHS, Marchon-Silva V, Schuertez JC, de Lima Pinheiro LR, de Costa Alves M, Téva A, Maia-Herzog M. Impact of 3 years ivermectin treatment on onchocerciasis in Yanomami communities in the Brazilian Amazon. . 2009; 112(2): 125-30.                                                                                 |           | 2001-2004 | Scientific literature |
| Onchocerciasis       | Rassi E, Lacerda N, Guaimaraes JA. Study of the area affected by onchocerciasis in Brazil: survey of local residents. . 1976; 10(1): 33-45.                                                                                                                                                                                                |           | 1974      | Scientific literature |
| Onchocerciasis       | Moraes MAP, Fraiha H, Chaves GM. Onchocerciasis in Brazil. . 1973; 7(4): 50-6.                                                                                                                                                                                                                                                             |           | 1973      | Scientific literature |
| Onchocerciasis       | of onchocerciasis in the area of the Toototobi river, Amazonas State, Brazil]. . 1978; 84(6): 510-9.                                                                                                                                                                                                                                       |           | 1976      | Scientific literature |
| Onchocerciasis       | Onchocerciasis Elimination Program for the Americas (OEPA). Onchocerciasis Elimination Program for the Americas. Guatemala City, Guatemala: Onchocerciasis Elimination Program for the Americas (OEPA).                                                                                                                                    | Country   | 1950-2017 | Epi surveillance      |
| Trachoma             | International Centre for Eye Health (ICEH). Brazil - Campinas Rapid Assessment of Avoidable Blindness 2004. Grootebroek, Netherlands: RAAB Repository.                                                                                                                                                                                     | São Paulo | 2003      | Survey                |
| Trachoma             | World Health Organization (WHO). WHO Global Health Observatory - Population Living in Trachoma Endemic Areas. Geneva, Switzerland: World Health Organization (WHO).                                                                                                                                                                        | Global    | 2007-2012 | Estimate              |
| Trachoma             | Carter Center, International Trachoma Initiative, London School of Hygiene and Tropical Medicine. Global Atlas of Trachoma. Decatur, United States: International Trachoma Initiative.                                                                                                                                                     | Global    | 2013      | Estimate              |
| Dengue               | Pan American Health Organization (PAHO). Number of Reported Cases of Dengue and Dengue Hemorrhagic Fever (DHF) in the Americas, by Country 2003. Washington, D.C., United States: Pan American Health Organization (PAHO), 2005.                                                                                                           | Global    | 2003      | Epi surveillance      |
| Dengue               | Pan American Health Organization (PAHO). Number of Reported Cases of Dengue and Severe Dengue (SD) in the Americas, by Country 2014. Washington, D.C., United States: Pan American Health Organization (PAHO), 2015.                                                                                                                       | Global    | 2014      | Epi surveillance      |
| Dengue               | Ministry of Health (Brazil). Brazil Information System for Notifiable Diseases 2009.                                                                                                                                                                                                                                                       | Country   | 2009      | Epi surveillance      |
| Dengue               | Pan American Health Organization (PAHO). Number of Reported Cases of Dengue and Severe Dengue (DS) in the Americas, by Country 2013. Washington, D.C., United States: Pan American Health Organization (PAHO), 2014.                                                                                                                       | Global    | 2013      | Epi surveillance      |
| Dengue               | Pan American Health Organization (PAHO). Number of Reported Cases of Dengue and Severe Dengue (DS) in the Americas, by Country 2012. Washington, D.C., United States: Pan American Health Organization (PAHO), 2013.                                                                                                                       | Global    | 2012      | Epi surveillance      |
| Dengue               | Pan American Health Organization (PAHO). Number of Reported Cases of Dengue and Severe Dengue (DS) in the Americas, by Country 2011. Washington, D.C., United States: Pan American Health Organization (PAHO), 2012.                                                                                                                       | Global    | 2011      | Epi surveillance      |
| Dengue               | Pan American Health Organization (PAHO). Number of Reported Cases of Dengue and Severe Dengue (DS) in the Americas, by Country 2010. Washington, D.C., United States: Pan American Health Organization (PAHO), 2011.                                                                                                                       | Global    | 2010      | Epi surveillance      |
| Dengue               | Pan American Health Organization (PAHO). Number of Reported Cases of Dengue and Severe Dengue (DS) in the Americas, by Country 2009. Washington, D.C., United States: Pan American Health Organization (PAHO), 2010.                                                                                                                       | Global    | 2009      | Epi surveillance      |
| Dengue               | Pan American Health Organization (PAHO). Number of Reported Cases of Dengue and Severe Dengue (DS) in the Americas, by Country 2008. Washington, D.C., United States: Pan American Health Organization (PAHO), 2009.                                                                                                                       | Global    | 2008      | Epi surveillance      |
| Dengue               | Pan American Health Organization (PAHO). Number of Reported Cases of Dengue and Dengue Hemorrhagic Fever (DHF) in the Americas, by Country 2007. Washington, D.C., United States: Pan American Health Organization (PAHO), 2008.                                                                                                           | Global    | 2007      | Epi surveillance      |
| Dengue               | Pan American Health Organization (PAHO). Number of Reported Cases of Dengue and Dengue Hemorrhagic Fever (DHF) in the Americas, by Country 2006. Washington, D.C., United States: Pan American Health Organization (PAHO), 2007.                                                                                                           | Global    | 2006      | Epi surveillance      |
| Dengue               | Pan American Health Organization (PAHO). Number of Reported Cases of Dengue and Dengue Hemorrhagic Fever (DHF) in the Americas, by Country 2005. Washington, D.C., United States: Pan American Health Organization (PAHO), 2006.                                                                                                           | Global    | 2005      | Epi surveillance      |
| Dengue               | World Health Organization (WHO). WHO DengueNet. Geneva, Switzerland: World Health Organization (WHO).                                                                                                                                                                                                                                      | Global    | 1988-2002 | Epi surveillance      |
| Dengue               | Secretariat of Health Surveillance, Ministry of Health (Brazil). Brazil Dengue Incidence Rate--Indicators and Basic Data 2008. Rio de Janeiro, Brazil: Ministry of Health (Brazil), 2008.                                                                                                                                                  | Country   | 2003-2007 | Epi surveillance      |

|                                               |                                                                                                                                                                                                                                                                                                                                                       |           |           |                       |
|-----------------------------------------------|-------------------------------------------------------------------------------------------------------------------------------------------------------------------------------------------------------------------------------------------------------------------------------------------------------------------------------------------------------|-----------|-----------|-----------------------|
| Dengue                                        | Pan American Health Organization (PAHO). Number of Reported Cases of Dengue and Dengue Hemorrhagic Fever (DHF) in the Americas, by Country 2004. Washington, D.C., United States: Pan American Health Organization (PAHO), 2005.                                                                                                                      | Global    | 2004      | Epi surveillance      |
| Dengue                                        | Ministry of Health (Brazil). Brazil Information System for Notifiable Diseases 2008.                                                                                                                                                                                                                                                                  | Country   | 2008      | Epi surveillance      |
| Dengue                                        | Ministry of Health (Brazil). Brazil Information System for Notifiable Diseases 2007.                                                                                                                                                                                                                                                                  | Country   | 2007      | Epi surveillance      |
| Yellow fever                                  | WHO Department of Communicable Disease Surveillance and Response. WHO Report on Global Surveillance of Epidemic-prone Infectious Diseases 2000.                                                                                                                                                                                                       | Country   | 1980-1981 | Epi surveillance      |
| Yellow fever                                  | Yellow fever in Africa and South America, 2007 - Weekly Epidemiological Record 2009                                                                                                                                                                                                                                                                   | Country   | 2007      | Epi surveillance      |
| Yellow fever                                  | Yellow fever in Africa and South America, 2006 - Weekly Epidemiological Record 2008                                                                                                                                                                                                                                                                   | Country   | 2006      | Epi surveillance      |
| Yellow fever                                  | Vasconcelos PF, Costa ZG, Travassos Da Rosa ES, Luna E, Rodrigues SG, Barros VL, Dias JP, Monteiro HA, Oliva OF, Vasconcelos HB, Oliveira RC, Sousa MR, Barbosa Da Silva J, Cruz AC, Martins EC, Travassos Da Rosa JF. Epidemic of jungle yellow fever in Brazil, 2000: implications of climatic alterations in disease spread. . 2001; 598-604.      |           | 2000      | Scientific literature |
| Yellow fever                                  | Barros VL, Da Rosa AP. An epidemic of sylvatic yellow fever in the southeast region of Maranhão State, Brazil, 1993-1994: epidemiologic and entomologic findings. . 1997; 57(2): 132-7.                                                                                                                                                               | Maranhão  | 1993      | Scientific literature |
| Yellow fever                                  | Vasconcelos PF de C. Febre amarela. . 2003; 36(2): 275-93.                                                                                                                                                                                                                                                                                            |           | 1982-1998 | Scientific literature |
| Yellow fever                                  | UNICEF Reported Disease Incidence Time Series. Geneva, Switzerland: World Health Organization (WHO).                                                                                                                                                                                                                                                  | Global    | 1990-2015 | Epi surveillance      |
| Intestinal nematode infections                | Global numbers of infection and disease burden of soil transmitted helminth infections in 2010 [Unpublished data]                                                                                                                                                                                                                                     | Global    | 1990-2010 | Scientific literature |
| Intestinal nematode infections                | World Health Organization (WHO). WHO PCT Databank - Soil-transmitted Helminthiases. Geneva, Switzerland: World Health Organization (WHO).                                                                                                                                                                                                             | Global    | 2003-2015 | Estimate              |
| Ascariasis                                    | Global numbers of infection and disease burden of soil transmitted helminth infections in 2010 [Unpublished data]                                                                                                                                                                                                                                     | Global    | 1990-2010 | Scientific literature |
| Trichuriasis                                  | Global numbers of infection and disease burden of soil transmitted helminth infections in 2010 [Unpublished data]                                                                                                                                                                                                                                     | Global    | 1990-2010 | Scientific literature |
| Hookworm disease                              | Global numbers of infection and disease burden of soil transmitted helminth infections in 2010 [Unpublished data]                                                                                                                                                                                                                                     | Global    | 1990-2010 | Scientific literature |
| Leprosy                                       | Leprosy - Global situation - Weekly Epidemiological Record 2000                                                                                                                                                                                                                                                                                       | Global    | 1999      | Epi surveillance      |
| Leprosy                                       | Leprosy - Weekly Epidemiological Record 2001                                                                                                                                                                                                                                                                                                          | Global    | 2000      | Epi surveillance      |
| Leprosy                                       | Global leprosy situation, September 1999 - Weekly Epidemiological Record 1999                                                                                                                                                                                                                                                                         | Global    | 1998      | Epi surveillance      |
| Leprosy                                       | Progress towards eliminating leprosy as a public health problem. Part 1 - Weekly Epidemiological Record 1994                                                                                                                                                                                                                                          | Global    | 1993      | Epi surveillance      |
| Leprosy                                       | Ministry of Health (Brazil). Brazil Information System for Notifiable Diseases - Leprosy.                                                                                                                                                                                                                                                             | Country   | 2001-2012 | Epi surveillance      |
| Leprosy                                       | Progress towards leprosy elimination - Weekly Epidemiological Record 1997                                                                                                                                                                                                                                                                             | Global    | 1996      | Epi surveillance      |
| Leprosy                                       | Progress towards the elimination of leprosy as a public health problem. Part 1 - Weekly Epidemiological Record 1995                                                                                                                                                                                                                                   | Global    | 1994      | Epi surveillance      |
| Leprosy                                       | Progress towards the elimination of leprosy as a public health problem - Weekly Epidemiological Record 1996                                                                                                                                                                                                                                           | Global    | 1995      | Epi surveillance      |
| Leprosy                                       | Progress towards the elimination of leprosy as a public health problem - Weekly Epidemiological Record 1993                                                                                                                                                                                                                                           | Country   | 1992      | Epi surveillance      |
| Zika virus                                    | Ministry of Health (Brazil). Brazil Epidemiological Situation - Zika Data. Rio de Janeiro, Brazil: Ministry of Health (Brazil).                                                                                                                                                                                                                       | Country   | 2016      | Epi surveillance      |
| Zika virus                                    | Pan American Health Organization (PAHO), World Health Organization (WHO). Cumulative Zika Confirmed and Suspected Cases Reported by Countries and Territories in the Americas 2015-2016, Updated as of February 12, 2016. Washington, D.C., United States: Pan American Health Organization (PAHO), 2016.                                             |           | 2015      | Epi surveillance      |
| Zika virus                                    | dos Santos T, Rodriguez A, Almiron M, Sanhueza A, Ramon P, de Oliveira WK, Coelho GE, Badaró R, Cortez J, Ospina M, Pimentel R, Masis R, Hernandez F, Lara B, Montoya R, Jubithana B, Melchor A, Alvarez A, Aldighieri S, Dye C, Espinal MA. Zika Virus and the Guillain-Barré Syndrome (Case Series from Seven Countries. . 2016; 375(16): 1598-601. |           | 2015      | Scientific literature |
| Zika virus                                    | Pan American Health Organization (PAHO), World Health Organization (WHO). Zika Cases and Congenital Syndrome Associated with Zika Virus, Reported by Countries and Territories in the Americas 2015-2016. Washington, D.C., United States: Pan American Health Organization (PAHO), 2016.                                                             | Country   | 2015-2016 | Epi surveillance      |
| Zika virus                                    | Ministry of Health (Brazil). Epidemiology Report 2016 No. 18-57, Monitoring the Cases of Microcephaly in Brazil, Weeks 1-50. Rio de Janeiro, Brazil: Ministry of Health (Brazil), 2016.                                                                                                                                                               | Country   | 2015-2016 | Epi surveillance      |
| Maternal disorders                            | Galvão LPL, Alvim-Pereira F, de Mendonça CMM, Menezes FEF, Góis KA do N, Ribeiro RF, Gurgel RQ. The prevalence of severe maternal morbidity and near miss and associated factors in Sergipe, Northeast Brazil. . 2014; 25.                                                                                                                            |           | 2011-2012 | Scientific literature |
| Maternal disorders                            | Rocha Filho EA, Costa ML, Cecatti JG, Parpinelli MA, Haddad SM, Sousa MH, Melo EF, Surita FG, Souza JP, Brazilian Network for Surveillance of Severe Maternal Morbidity Study Group. Contribution of antepartum and intrapartum hemorrhage to the burden of maternal near miss and death in a national surveillance study. . 2015; 94(1): 508.        |           | 2009-2010 | Scientific literature |
| Maternal disorders                            | Amaral E, Souza JP, Surita F, Luz AG, Sousa MH, Cecatti JG, Campbell O. A population-based surveillance study on severe acute maternal morbidity (near-miss) and adverse perinatal outcomes in Campinas, Brazil: the Vigimoma Project. . 2011; 11: 9.                                                                                                 |           | 2005      | Scientific literature |
| Maternal hemorrhage                           | Galvão LPL, Alvim-Pereira F, de Mendonça CMM, Menezes FEF, Góis KA do N, Ribeiro RF, Gurgel RQ. The prevalence of severe maternal morbidity and near miss and associated factors in Sergipe, Northeast Brazil. . 2014; 25.                                                                                                                            |           | 2011-2012 | Scientific literature |
| Maternal hemorrhage                           | Rocha Filho EA, Costa ML, Cecatti JG, Parpinelli MA, Haddad SM, Sousa MH, Melo EF, Surita FG, Souza JP, Brazilian Network for Surveillance of Severe Maternal Morbidity Study Group. Contribution of antepartum and intrapartum hemorrhage to the burden of maternal near miss and death in a national surveillance study. . 2015; 94(1): 508.        |           | 2009-2010 | Scientific literature |
| Maternal hemorrhage                           | Amaral E, Souza JP, Surita F, Luz AG, Sousa MH, Cecatti JG, Campbell O. A population-based surveillance study on severe acute maternal morbidity (near-miss) and adverse perinatal outcomes in Campinas, Brazil: the Vigimoma Project. . 2011; 11: 9.                                                                                                 |           | 2005      | Scientific literature |
| Maternal sepsis and other maternal infections | Ministry of Health (Brazil). Brazil Hospital Information System 1997. Rio de Janeiro, Brazil: Ministry of Health (Brazil).                                                                                                                                                                                                                            | Country   | 1993-1997 | Administrative record |
| Maternal sepsis and other maternal infections | Ministry of Health (Brazil). Brazil Hospital Information System 2008-2012.                                                                                                                                                                                                                                                                            |           | 2008-2012 | Administrative record |
| Maternal sepsis and other maternal infections | Institute for Health Metrics and Evaluation (IHME). IHME GBD DisMod Maternal Live Birth Adjusted Estimates.                                                                                                                                                                                                                                           | Global    | 1990-2016 | Modeled data          |
| Maternal sepsis and other maternal infections | Madeiro AP, Rufino AC, Lacerda EZ, Brasil LG. Incidence and determinants of severe maternal morbidity: a transversal study in a referral hospital in Teresina, Piauí, Brazil. . 2015; 15: 210.                                                                                                                                                        |           | 2012-2013 | Scientific literature |
| Maternal sepsis and other maternal infections | Morse ML, Fonseca SC, Gottgroy CL, Waldmann CS, Gueller E. Severe maternal morbidity and near misses in a regional reference hospital. . 2011; 14(2): 310-22.                                                                                                                                                                                         |           | 2009      | Scientific literature |
| Maternal sepsis and other maternal infections | Health Institute (São Paulo, Brazil), State University of Campinas, São Paulo Municipal Health Department, São Paulo State University, University of São Paulo. Brazil - São Paulo Health Survey 2008-2009.                                                                                                                                           | São Paulo | 2002-2008 | Survey                |
| Maternal sepsis and other maternal infections | Amaral E, Souza JP, Surita F, Luz AG, Sousa MH, Cecatti JG, Campbell O. A population-based surveillance study on severe acute maternal morbidity (near-miss) and adverse perinatal outcomes in Campinas, Brazil: the Vigimoma Project. . 2011; 11: 9.                                                                                                 |           | 2005      | Scientific literature |
| Maternal sepsis and other maternal infections | Ministry of Health (Brazil). Brazil Hospital Information System 1998-2002.                                                                                                                                                                                                                                                                            |           | 1998-2002 | Administrative record |
| Maternal sepsis and other maternal infections | Ministry of Health (Brazil). Brazil Hospital Information System 2003-2007.                                                                                                                                                                                                                                                                            |           | 2003-2007 | Administrative record |
| Maternal sepsis and other maternal infections | Brazilian Institute of Geography and Statistics (IBGE), Ministry of Health (Brazil), Ministry of Planning, Budget, and Management (Brazil). Brazil National Health Survey 2013. Rio de Janeiro, Brazil: Brazilian Institute of Geography and Statistics (IBGE).                                                                                       | Country   | 2013-2014 | Survey                |
| Maternal sepsis and other maternal infections | Brazil World Health Survey 2003                                                                                                                                                                                                                                                                                                                       | Country   | 2002-2003 | Survey                |
| Maternal sepsis and other maternal infections | Ministry of Health (Brazil). Brazil Hospital Information System 2013-2014.                                                                                                                                                                                                                                                                            |           | 2013-2017 | Administrative record |
| Maternal hypertensive disorders               | Amaral E, Souza JP, Surita F, Luz AG, Sousa MH, Cecatti JG, Campbell O. A population-based surveillance study on severe acute maternal morbidity (near-miss) and adverse perinatal outcomes in Campinas, Brazil: the Vigimoma Project. . 2011; 11: 9.                                                                                                 |           | 2005      | Scientific literature |
| Maternal hypertensive disorders               | Ministry of Health (Brazil). Brazil Hospital Information System 2003-2007.                                                                                                                                                                                                                                                                            |           | 2003-2007 | Administrative record |
| Maternal hypertensive disorders               | Ministry of Health (Brazil). Brazil Hospital Information System 2013-2014.                                                                                                                                                                                                                                                                            |           | 2013-2017 | Administrative record |
| Maternal hypertensive disorders               | Brazilian Institute of Geography and Statistics (IBGE), Ministry of Health (Brazil), Ministry of Planning, Budget, and Management (Brazil). Brazil National Health Survey 2013. Rio de Janeiro, Brazil: Brazilian Institute of Geography and Statistics (IBGE).                                                                                       | Country   | 2013-2014 | Survey                |
| Maternal hypertensive disorders               | Galvão LPL, Alvim-Pereira F, de Mendonça CMM, Menezes FEF, Góis KA do N, Ribeiro RF, Gurgel RQ. The prevalence of severe maternal morbidity and near miss and associated factors in Sergipe, Northeast Brazil. . 2014; 25.                                                                                                                            |           | 2011-2012 | Scientific literature |
| Maternal hypertensive disorders               | Ministry of Health (Brazil). Brazil Hospital Information System 2008-2012.                                                                                                                                                                                                                                                                            |           | 2008-2012 | Administrative record |
| Maternal hypertensive disorders               | Morse ML, Fonseca SC, Gottgroy CL, Waldmann CS, Gueller E. Severe maternal morbidity and near misses in a regional reference hospital. . 2011; 14(2): 310-22.                                                                                                                                                                                         |           | 2009      | Scientific literature |
| Maternal hypertensive disorders               | Health Institute (São Paulo, Brazil), State University of Campinas, São Paulo Municipal Health Department, São Paulo State University, University of São Paulo. Brazil - São Paulo Health Survey 2008-2009.                                                                                                                                           | São Paulo | 2002-2008 | Survey                |

|                                                          |                                                                                                                                                                                                                                                                                                                                 |           |           |                       |
|----------------------------------------------------------|---------------------------------------------------------------------------------------------------------------------------------------------------------------------------------------------------------------------------------------------------------------------------------------------------------------------------------|-----------|-----------|-----------------------|
| Maternal hypertensive disorders                          | Madeiro AP, Rufino AC, Lacerda EZ, Brasil LG. Incidence and determinants of severe maternal morbidity: a transversal study in a referral hospital in Teresina, Piauí, Brazil. . 2015; 15: 210.                                                                                                                                  |           | 2012-2013 | Scientific literature |
| Maternal hypertensive disorders                          | Giordano JC, Parpinelli MA, Cecatti JG, Haddad SM, Costa ML, Surita FG, Pinto E Silva JL, Sousa MH. The burden of eclampsia: results from a multicenter study on surveillance of severe maternal morbidity in Brazil. . 2014; 9(5): e97401.                                                                                     |           | 2009-2010 | Scientific literature |
| Maternal hypertensive disorders                          | Institute for Health Metrics and Evaluation (IHME). IHME GBD DisMod Maternal Live Birth Adjusted Estimates.                                                                                                                                                                                                                     | Global    | 1990-2016 | Modeled data          |
| Maternal hypertensive disorders                          | Souza JP, Cecatti JG, Faundes A, Morais SS, Villar J, Carroli G, Gulmezoglu M, Wojdyla D, Zavaleta N, Donner A, Velazco A, Bataglia V, Valladares E, Kublickas M, Acosta A. Maternal near miss and maternal death in the World Health Organization's 2005 global survey on maternal and perinatal health. . 2010; 88(2): 113-9. |           | 2005      | Scientific literature |
| Maternal hypertensive disorders                          | Ministry of Health (Brazil). Brazil Hospital Information System 1997. Rio de Janeiro, Brazil: Ministry of Health (Brazil).                                                                                                                                                                                                      | Country   | 1993-1997 | Administrative record |
| Maternal hypertensive disorders                          | Zanette E, Parpinelli MA, Surita FG, Costa ML, Haddad SM, Sousa MH, E Silva JLP, Souza JP, Cecatti JG, Brazilian Network for Surveillance of Severe Maternal Morbidity Group. Maternal near miss and death among women with severe hypertensive disorders: a Brazilian multicenter surveillance study. . 2014; 11(1): 4.        |           | 2009-2010 | Scientific literature |
| Maternal hypertensive disorders                          | Vogel JP, Lee ACC, Souza JP. Maternal morbidity and preterm birth in 22 low- and middle-income countries: a secondary analysis of the WHO Global Survey dataset. . 2014; 56.                                                                                                                                                    |           | 2004-2005 | Scientific literature |
| Maternal hypertensive disorders                          | Brazil World Health Survey 2003                                                                                                                                                                                                                                                                                                 | Country   | 2002-2003 | Survey                |
| Maternal hypertensive disorders                          | Ministry of Health (Brazil). Brazil Hospital Information System 1998-2002.                                                                                                                                                                                                                                                      |           | 1998-2002 | Administrative record |
| Maternal abortion, miscarriage, and ectopic pregnancy    | Ministry of Health (Brazil). Brazil Hospital Information System 1997. Rio de Janeiro, Brazil: Ministry of Health (Brazil).                                                                                                                                                                                                      | Country   | 1993-1997 | Administrative record |
| Maternal abortion, miscarriage, and ectopic pregnancy    | Health Institute (São Paulo, Brazil), State University of Campinas, São Paulo Municipal Health Department, São Paulo State University, University of São Paulo. Brazil - São Paulo Health Survey 2008-2009.                                                                                                                     | São Paulo | 2002-2008 | Survey                |
| Maternal abortion, miscarriage, and ectopic pregnancy    | Madeiro AP, Rufino AC, Lacerda EZ, Brasil LG. Incidence and determinants of severe maternal morbidity: a transversal study in a referral hospital in Teresina, Piauí, Brazil. . 2015; 15: 210.                                                                                                                                  |           | 2012-2013 | Scientific literature |
| Maternal abortion, miscarriage, and ectopic pregnancy    | Ministry of Health (Brazil). Brazil Hospital Information System 1998-2002.                                                                                                                                                                                                                                                      |           | 1998-2002 | Administrative record |
| Maternal abortion, miscarriage, and ectopic pregnancy    | Brazil World Health Survey 2003                                                                                                                                                                                                                                                                                                 | Country   | 2002-2003 | Survey                |
| Maternal abortion, miscarriage, and ectopic pregnancy    | Brazilian Institute of Geography and Statistics (IBGE), Ministry of Health (Brazil), Ministry of Planning, Budget, and Management (Brazil). Brazil National Health Survey 2013. Rio de Janeiro, Brazil: Brazilian Institute of Geography and Statistics (IBGE).                                                                 | Country   | 2013-2014 | Survey                |
| Maternal abortion, miscarriage, and ectopic pregnancy    | Ministry of Health (Brazil). Brazil Hospital Information System 2013-2014.                                                                                                                                                                                                                                                      |           | 2013-2017 | Administrative record |
| Maternal abortion, miscarriage, and ectopic pregnancy    | Ministry of Health (Brazil). Brazil Hospital Information System 2003-2007.                                                                                                                                                                                                                                                      |           | 2003-2007 | Administrative record |
| Maternal abortion, miscarriage, and ectopic pregnancy    | Santos TF, Andreoni S, de Souza e Silva R. Prevalence and characteristics of women with induced abortion-Favela México 70, São Vicente-São Paulo. . 2012; 15(1): 123-33.                                                                                                                                                        |           | 2008      | Scientific literature |
| Maternal abortion, miscarriage, and ectopic pregnancy    | Ministry of Health (Brazil). Brazil Hospital Information System 2008-2012.                                                                                                                                                                                                                                                      |           | 2008-2012 | Administrative record |
| Neonatal preterm birth complications                     | Brazilian Institute of Geography and Statistics (IBGE), Ministry of Health (Brazil), Ministry of Planning, Budget, and Management (Brazil). Brazil National Health Survey 2013. Rio de Janeiro, Brazil: Brazilian Institute of Geography and Statistics (IBGE).                                                                 | Country   | 2013-2014 | Survey                |
| Neonatal preterm birth complications                     | Health Institute (São Paulo, Brazil), State University of Campinas, São Paulo Municipal Health Department, São Paulo State University, University of São Paulo. Brazil - São Paulo Health Survey 2008-2009.                                                                                                                     | São Paulo | 2002-2008 | Survey                |
| Neonatal preterm birth complications                     | Ministry of Health (Brazil). Brazil Hospital Information System 2003-2007.                                                                                                                                                                                                                                                      |           | 2003-2007 | Administrative record |
| Neonatal preterm birth complications                     | Ministry of Health (Brazil). Brazil DATASUS TABNET Vital Statistics Live Births 1996. Rio de Janeiro, Brazil: Ministry of Health (Brazil).                                                                                                                                                                                      | Country   | 1996      | Vital registration    |
| Neonatal preterm birth complications                     | Ministry of Health (Brazil). Brazil Hospital Information System 2008-2012.                                                                                                                                                                                                                                                      |           | 2008-2012 | Administrative record |
| Neonatal preterm birth complications                     | Ministry of Health (Brazil). Brazil Hospital Information System 1997. Rio de Janeiro, Brazil: Ministry of Health (Brazil).                                                                                                                                                                                                      | Country   | 1993-1997 | Administrative record |
| Neonatal preterm birth complications                     | Brazil World Health Survey 2003                                                                                                                                                                                                                                                                                                 | Country   | 2002-2003 | Survey                |
| Neonatal preterm birth complications                     | Ministry of Health (Brazil). Brazil Hospital Information System 2013-2014.                                                                                                                                                                                                                                                      |           | 2013-2017 | Administrative record |
| Neonatal preterm birth complications                     | Ministry of Health (Brazil). Brazil Hospital Information System 1998-2002.                                                                                                                                                                                                                                                      |           | 1998-2002 | Administrative record |
| Neonatal preterm birth complications                     | Straughn HK, Goldenberg RL, Tolosa JE, Daly S, de Codes J, Festin MR, Limpongpanurak S, Lumbiganon P, Paul VK, Peedicayil A, Purwar M, Sabogal JC, Shenoy S. Birthweight-specific neonatal mortality in developing countries and obstetric practices. . 2003; 80(1): 71-8.                                                      |           | 2003      | Scientific literature |
| Neonatal preterm birth complications                     | Ministry of Health (Brazil). Brazil DATASUS TABNET Vital Statistics Live Births 2000. Rio de Janeiro, Brazil: Ministry of Health (Brazil).                                                                                                                                                                                      | Country   | 2000      | Vital registration    |
| Neonatal preterm birth complications                     | Ministry of Health (Brazil). Brazil DATASUS TABNET Vital Statistics Live Births 1997. Rio de Janeiro, Brazil: Ministry of Health (Brazil).                                                                                                                                                                                      | Country   | 1997      | Vital registration    |
| Neonatal preterm birth complications                     | Ministry of Health (Brazil). Brazil DATASUS TABNET Vital Statistics Live Births 2004. Rio de Janeiro, Brazil: Ministry of Health (Brazil).                                                                                                                                                                                      | Country   | 2004      | Vital registration    |
| Neonatal preterm birth complications                     | Neonatal Units in Rio de Janeiro: Screening Criteria and Workload Implications. . 2010; 126(2): e410-e417.                                                                                                                                                                                                                      |           | 2005      | Scientific literature |
| Neonatal preterm birth complications                     | Ministry of Health (Brazil). Brazil DATASUS TABNET Vital Statistics Live Births 2012. Rio de Janeiro, Brazil: Ministry of Health (Brazil).                                                                                                                                                                                      | Country   | 2012      | Vital registration    |
| Neonatal preterm birth complications                     | Ministry of Health (Brazil). Brazil DATASUS TABNET Vital Statistics Live Births 2002. Rio de Janeiro, Brazil: Ministry of Health (Brazil).                                                                                                                                                                                      | Country   | 2002      | Vital registration    |
| Neonatal preterm birth complications                     | Filho JBF, Eckert GU, Procianny L, Barros CK, Procianny RS. Incidence and risk factors for retinopathy of prematurity in very low and in extremely low birth weight infants in a unit-based approach in southern Brazil. . 2007; 23(1): 25-30.                                                                                  |           | 2004      | Scientific literature |
| Neonatal preterm birth complications                     | Ministry of Health (Brazil). Brazil DATASUS TABNET Vital Statistics Live Births 2005. Rio de Janeiro, Brazil: Ministry of Health (Brazil).                                                                                                                                                                                      | Country   | 2005      | Vital registration    |
| Neonatal preterm birth complications                     | Ministry of Health (Brazil). Brazil DATASUS TABNET Vital Statistics Live Births 2006. Rio de Janeiro, Brazil: Ministry of Health (Brazil).                                                                                                                                                                                      | Country   | 2006      | Vital registration    |
| Neonatal preterm birth complications                     | Ministry of Health (Brazil). Brazil DATASUS TABNET Vital Statistics Live Births 2007. Rio de Janeiro, Brazil: Ministry of Health (Brazil).                                                                                                                                                                                      | Country   | 2007      | Vital registration    |
| Neonatal preterm birth complications                     | Graziano RM, Leone CR, Cunha SL, Pinheiro AC. [Prevalence of retinopathy of prematurity in very low birth weight infants]. . 1996; 73(6): 377-82.                                                                                                                                                                               |           | 1993      | Scientific literature |
| Neonatal preterm birth complications                     | Ministry of Health (Brazil). Brazil DATASUS TABNET Vital Statistics Live Births 2001. Rio de Janeiro, Brazil: Ministry of Health (Brazil).                                                                                                                                                                                      | Country   | 2001      | Vital registration    |
| Neonatal preterm birth complications                     | Ministry of Health (Brazil). Brazil DATASUS TABNET Vital Statistics Live Births 2008. Rio de Janeiro, Brazil: Ministry of Health (Brazil).                                                                                                                                                                                      | Country   | 2008      | Vital registration    |
| Neonatal preterm birth complications                     | Ministry of Health (Brazil). Brazil DATASUS TABNET Vital Statistics Live Births 1998. Rio de Janeiro, Brazil: Ministry of Health (Brazil).                                                                                                                                                                                      | Country   | 1998      | Vital registration    |
| Neonatal preterm birth complications                     | Ministry of Health (Brazil). Brazil DATASUS TABNET Vital Statistics Live Births 1999. Rio de Janeiro, Brazil: Ministry of Health (Brazil).                                                                                                                                                                                      | Country   | 1999      | Vital registration    |
| Neonatal preterm birth complications                     | Ministry of Health (Brazil). Brazil DATASUS TABNET Vital Statistics Live Births 2009. Rio de Janeiro, Brazil: Ministry of Health (Brazil).                                                                                                                                                                                      | Country   | 2009      | Vital registration    |
| Neonatal preterm birth complications                     | Ministry of Health (Brazil). Brazil DATASUS TABNET Vital Statistics Live Births 2010. Rio de Janeiro, Brazil: Ministry of Health (Brazil).                                                                                                                                                                                      | Country   | 2010      | Vital registration    |
| Neonatal preterm birth complications                     | Ministry of Health (Brazil). Brazil DATASUS TABNET Vital Statistics Live Births 2011. Rio de Janeiro, Brazil: Ministry of Health (Brazil).                                                                                                                                                                                      | Country   | 2011      | Vital registration    |
| Neonatal preterm birth complications                     | Ministry of Health (Brazil). Brazil DATASUS TABNET Vital Statistics Live Births 2003. Rio de Janeiro, Brazil: Ministry of Health (Brazil).                                                                                                                                                                                      | Country   | 2003      | Vital registration    |
| Neonatal encephalopathy due to birth asphyxia and trauma | Brazilian Institute of Geography and Statistics (IBGE), Ministry of Health (Brazil), Ministry of Planning, Budget, and Management (Brazil). Brazil National Health Survey 2013. Rio de Janeiro, Brazil: Brazilian Institute of Geography and Statistics (IBGE).                                                                 | Country   | 2013-2014 | Survey                |
| Neonatal encephalopathy due to birth asphyxia and trauma | Brazil World Health Survey 2003                                                                                                                                                                                                                                                                                                 | Country   | 2002-2003 | Survey                |
| Neonatal encephalopathy due to birth asphyxia and trauma | Da Silva LFG, Höefel Filho JR, Anés M, Nunes ML. Prognostic value of 1H-MRS in neonatal encephalopathy. . 2006; 34(5): 360-6.                                                                                                                                                                                                   |           | 2003-2004 | Scientific literature |
| Neonatal encephalopathy due to birth asphyxia and trauma | Health Institute (São Paulo, Brazil), State University of Campinas, São Paulo Municipal Health Department, São Paulo State University, University of São Paulo. Brazil - São Paulo Health Survey 2008-2009.                                                                                                                     | São Paulo | 2002-2008 | Survey                |
| Neonatal sepsis and other neonatal infections            | Brazilian Institute of Geography and Statistics (IBGE), Ministry of Health (Brazil), Ministry of Planning, Budget, and Management (Brazil). Brazil National Health Survey 2013. Rio de Janeiro, Brazil: Brazilian Institute of Geography and Statistics (IBGE).                                                                 | Country   | 2013-2014 | Survey                |
| Neonatal sepsis and other neonatal infections            | Ministry of Health (Brazil). Brazil Hospital Information System 1998-2002.                                                                                                                                                                                                                                                      |           | 1998-2002 | Administrative record |
| Neonatal sepsis and other neonatal infections            | Ministry of Health (Brazil). Brazil Hospital Information System 1997. Rio de Janeiro, Brazil: Ministry of Health (Brazil).                                                                                                                                                                                                      | Country   | 1993-1997 | Administrative record |
| Neonatal sepsis and other neonatal infections            | Ministry of Health (Brazil). Brazil Hospital Information System 2003-2007.                                                                                                                                                                                                                                                      |           | 2003-2007 | Administrative record |
| Neonatal sepsis and other neonatal infections            | Ministry of Health (Brazil). Brazil Hospital Information System 2013-2014.                                                                                                                                                                                                                                                      |           | 2013-2017 | Administrative record |
| Neonatal sepsis and other neonatal infections            | Brazil World Health Survey 2003                                                                                                                                                                                                                                                                                                 | Country   | 2002-2003 | Survey                |
| Neonatal sepsis and other neonatal infections            | Health Institute (São Paulo, Brazil), State University of Campinas, São Paulo Municipal Health Department, São Paulo State University, University of São Paulo. Brazil - São Paulo Health Survey 2008-2009.                                                                                                                     | São Paulo | 2002-2008 | Survey                |
| Neonatal sepsis and other neonatal infections            | Ministry of Health (Brazil). Brazil Hospital Information System 2008-2012.                                                                                                                                                                                                                                                      |           | 2008-2012 | Administrative record |

|                                               |                                                                                                                                                                                                                                                                                                                                                                |                |           |                       |
|-----------------------------------------------|----------------------------------------------------------------------------------------------------------------------------------------------------------------------------------------------------------------------------------------------------------------------------------------------------------------------------------------------------------------|----------------|-----------|-----------------------|
| Hemolytic disease and other neonatal jaundice | Institute for Health Metrics and Evaluation (IHME). IHME GBD DisMod Neonatal Hemolytic Disease Excess Mortality Estimates.                                                                                                                                                                                                                                     | Global         | 1990-2016 | Modeled data          |
| Hemolytic disease and other neonatal jaundice | Bhutani VK, Zupirsky A, Blencowe H, Khanna R, Sgro M, Ebbesen F, Bell J, Mori R, Slusher TM, Fahmy N, Paul VK, Du L, Okolo AA, de Almeida MF, Olusanya BO, Kumar P, Couzens S, Lawn JE. Neonatal hyperbilirubinemia and Rhesus disease of the newborn: incidence and impairment estimates for 2010 at regional and global levels. . 2013; 74(Suppl 1): 86-100. |                | 2010      | Scientific literature |
| Hemolytic disease and other neonatal jaundice | Institute for Health Metrics and Evaluation (IHME). IHME GBD 2013 DisMod model input - Neonatal Conditions.                                                                                                                                                                                                                                                    | Global         | 1990-2016 | Modeled data          |
| Hemolytic disease and other neonatal jaundice | Brazilian Society for Family Welfare (BEMFAM), Macro International, Inc. Brazil Demographic and Health Survey - Complete Birth History Data.                                                                                                                                                                                                                   |                | 1982-1997 | Survey                |
| Vitamin A deficiency                          | [Epidemiologic Survey of xerophthalmia in the State of Paraíba] as it appears in Clinical, Subclinical, and Epidemiological Aspects of Vitamin A Deficiency in the State of Paraíba as it appears in                                                                                                                                                           |                | 1981-1983 | Scientific literature |
| Vitamin A deficiency                          | Brazil - Pernambuco Second State Survey of Health and Nutrition 1997 as it appears in                                                                                                                                                                                                                                                                          | Paraíba        | 1992      | Report                |
| Vitamin A deficiency                          | Martins MC, Santos LMP, Assis AMO. [Prevalence of hypovitaminosis A among preschool children from northeastern Brazil, 1998]. . 2004; 38(4): 537-42.                                                                                                                                                                                                           | Pernambuco     | 1997      | Survey                |
| Vitamin A deficiency                          | Azevedo MMS de, Cabral PC, Diniz A da S, Fiszberg M, Fiszberg RM, Arruda IKG de. [Vitamin A deficiency in preschool children of Recife, Northeast of Brazil]. . 2010; 60(1): 36-41.                                                                                                                                                                            |                | 1998      | Scientific literature |
| Vitamin A deficiency                          | Fogarty International Center, National Institutes of Health (NIH), Foundation for the National Institutes of Health (FNIH), National Institute of Science, Technology, and Biomedicine of Semi-Arid Brazil (INCT-IBISAB), Brazil - Fortaleza Malnutrition and Enteric Disease Study 2009-2014.                                                                 |                | 2007      | Scientific literature |
| Iron-deficiency anemia                        | Zago MA, Costa FF. Hereditary haemoglobin disorders in Brazil. . 1985; 79(3): 385-8.                                                                                                                                                                                                                                                                           | Ceará          | 2010-2013 | Survey                |
| Iron-deficiency anemia                        | Brazilian Center for Analysis and Planning (CEBRAP), Brazilian Institute of Public Opinion and Statistics (IBOPE), Ministry of Health (Brazil). Brazil National Demographic and Health Survey of Children and Women 2006-2007. Rio de Janeiro, Brazil: Ministry of Health (Brazil).                                                                            |                | 1983-1985 | Scientific literature |
| Iron-deficiency anemia                        | Ministry of Health (Brazil). Brazil Hospital Information System 2008-2012.                                                                                                                                                                                                                                                                                     | Country        | 2006-2007 | Survey                |
| Iron-deficiency anemia                        | King CH, Dickman K, Tisch DJ. Reassessment of the cost of chronic helminth infection: a meta-analysis of disability-related outcomes in endemic schistosomiasis. . 2005; 365(9470): 15619.                                                                                                                                                                     |                | 2008-2012 | Administrative record |
| Iron-deficiency anemia                        | Assis AMO, Gaudenzi EN, Gomes G, Ribeiro R de C, Szarfarc SC, Souza SB de. (Hemoglobin concentration, breastfeeding and complementary feeding in the first year of life). . 2004; 38(4): 543-51.                                                                                                                                                               |                | 1966-1978 | Scientific literature |
| Iron-deficiency anemia                        | Adolescents: Health, Education, and Work 1991. Teresina, Brazil: Piauí State Government, 1992.                                                                                                                                                                                                                                                                 |                | 1998-1999 | Scientific literature |
| Iron-deficiency anemia                        | Rondo PH, Abbott R, Rodrigues LC, Tomkins AM. Vitamin A, folate, and iron concentrations in cord and maternal blood of intra-uterine growth retarded and appropriate birth weight babies. . 1995; 49(6): 391-9.                                                                                                                                                | Piauí          | 1991      | Report                |
| Iron-deficiency anemia                        | Osório MM, Lira PI, Batista-Filho M, Ashworth A. Prevalence of anemia in children 6-59 months old in the state of Pernambuco, Brazil. . 2001; 10(2): 101-7.                                                                                                                                                                                                    |                | 1991-1992 | Scientific literature |
| Iron-deficiency anemia                        | Muniz-Junqueira MI, Queiroz EFO. Relationship between protein-energy malnutrition, vitamin A, and parasitoses in living in Brasília. . 2002; 35(2): 133-41.                                                                                                                                                                                                    |                | 2006      | Scientific literature |
| Iron-deficiency anemia                        | Brazil - School Lunch: History, Evolution and Contribution in Addressing the Nutritional Needs of the Child                                                                                                                                                                                                                                                    |                | 1983      | Scientific literature |
| Iron-deficiency anemia                        | Ministry of Health (Brazil). Brazil Hospital Information System 2013-2014.                                                                                                                                                                                                                                                                                     |                | 1996      | Report                |
| Iron-deficiency anemia                        | Iron Deficiency and Iron Deficiency Anemia in the Population of 6 Months to 6 Years in Vitória, Espírito Santo, Southeastern Brazil                                                                                                                                                                                                                            |                | 2013-2017 | Administrative record |
| Iron-deficiency anemia                        | Ministry of Health (Brazil). Brazil Hospital Information System 1997. Rio de Janeiro, Brazil: Ministry of Health (Brazil).                                                                                                                                                                                                                                     | Espírito Santo | 2001-2003 | Report                |
| Iron-deficiency anemia                        | Ministry of Health (Brazil). Brazil Hospital Information System 2003-2007.                                                                                                                                                                                                                                                                                     | Country        | 1993-1997 | Administrative record |
| Iron-deficiency anemia                        | Ministry of Health (Brazil). Brazil Hospital Information System 1998-2002.                                                                                                                                                                                                                                                                                     |                | 2003-2007 | Administrative record |
| Syphilis                                      | Ministry of Health (Brazil). Brazil Hospital Information System 2013-2014.                                                                                                                                                                                                                                                                                     |                | 1998-2002 | Administrative record |
| Syphilis                                      | Ministry of Health (Brazil). Brazil Hospital Information System 2008-2012.                                                                                                                                                                                                                                                                                     |                | 2013-2017 | Administrative record |
| Syphilis                                      | Joint United Nations Program on HIV/AIDS (UNAIDS), United Nations Children's Fund (UNICEF), World Health Organization (WHO). Brazil Global AIDS Response Progress Reporting (GARPR) System - Antenatal Care Attendees Positive for Syphilis.                                                                                                                   | Country        | 2008-2012 | Administrative record |
| Syphilis                                      | Rodrigues CS, Guimarães MDC, Grupo Nacional de Estudo sobre Sífilis Congenita. [Syphilis positivity in puerperal women: still a challenge in Brazil]. . 2004; 16(3): 168-75.                                                                                                                                                                                   |                | 2010-2012 | Epi surveillance      |
| Syphilis                                      | Nobrega I, Dantas P, Rocha P, Rios I, Abraao M, Netto EM, Brites C. Syphilis and HIV-1 among parturient women in Salvador, Brazil: low prevalence of syphilis and high rate of loss to follow-up in HIV-infected women. . 2013; 17(2): 184-93.                                                                                                                 |                | 1999-2000 | Scientific literature |
| Syphilis                                      | Ribeiro D, Rezende EF, Pinto VM, Pereira GFM, Miranda AE. Prevalence of and risk factors for syphilis in Brazilian armed forces conscripts. . 2012; 88(1): 32-6.                                                                                                                                                                                               |                | 2008-2009 | Scientific literature |
| Syphilis                                      | Szwarcwald CL, de Carvalho MF, Barbosa Junior A, Barreira D, Speranza FAB, de Castilho EA. Temporal trends of HIV-related risk behavior among Brazilian military conscripts, 1997-2002. . 2005; 60(5): 3677-84.                                                                                                                                                |                | 2007      | Scientific literature |
| Syphilis                                      | Amaral E, Faundes A, Gonçalves NS, Pellegrino Junior J, de Souza CA, Pinto e Silva JL. Prevalence of HIV and Treponema pallidum infections in pregnant women in Campinas and their association with socio-demographic factors. . 1996; 114(2): 1108-16.                                                                                                        |                | 1997-2002 | Scientific literature |
| Syphilis                                      | Balão AM, Kupek E, Petry A. Syphilis seroprevalence estimates of Santa Catarina blood donors in 2010. . 2014; 47(2): 179-85.                                                                                                                                                                                                                                   | São Paulo      | 1991      | Scientific literature |
| Syphilis                                      | Boa-Sorte N, Purificação A, Amorim T, Assunção L, Reis A, Galvão-Castro B. Dried blood spot testing for the antenatal screening of HTLV, HIV, syphilis, toxoplasmosis and hepatitis B and C: prevalence, accuracy and operational aspects. . 2014; 18(6): 618-24.                                                                                              |                | 2010      | Scientific literature |
| Syphilis                                      | Miranda AE, Figueiredo NC, Schmidt R, Page-Shafer K. A population-based survey of the prevalence of HIV, syphilis, hepatitis B and hepatitis C infections, and associated risk factors among young women in Vitória, Brazil. . 2008; 12(4 Suppl): 525-31.                                                                                                      |                | 2009-2010 | Scientific literature |
| Syphilis                                      | Benzenek AS, Sabido M, Galban E, Pedroza V, Araújo AJ, Peeling RW, Mabey D. Field performance of a rapid point-of-care diagnostic test for antenatal syphilis screening in the Amazon region, Brazil. . 2011; 22(1): 15-8.                                                                                                                                     |                | 2006      | Scientific literature |
| Syphilis                                      | Ministry of Health (Brazil). Brazil Hospital Information System 2003-2007.                                                                                                                                                                                                                                                                                     |                | 2003-2007 | Administrative record |
| Syphilis                                      | De Souza NCN, Botelho CAO, Honer MR. Retrospective study of a pioneer antenatal screening program with 8,477 pregnant women in Brazil. . 2004; 31(3): 217-20.                                                                                                                                                                                                  |                | 2002-2003 | Scientific literature |
| Syphilis                                      | Ministry of Health (Brazil). Brazil Hospital Information System 1998-2002.                                                                                                                                                                                                                                                                                     |                | 1998-2002 | Administrative record |
| Syphilis                                      | Brazil World Health Survey 2003                                                                                                                                                                                                                                                                                                                                | Country        | 2002-2003 | Survey                |
| Syphilis                                      | Brazilian Institute of Geography and Statistics (IBGE), Ministry of Health (Brazil), Ministry of Planning, Budget, and Management (Brazil). Brazil National Health Survey 2013. Rio de Janeiro, Brazil: Brazilian Institute of Geography and Statistics (IBGE).                                                                                                | Country        | 2013-2014 | Survey                |
| Syphilis                                      | Health Institute (São Paulo, Brazil), State University of Campinas, São Paulo Municipal Health Department, São Paulo State University, University of São Paulo, Brazil - São Paulo Health Survey 2008-2009.                                                                                                                                                    | São Paulo      | 2002-2008 | Survey                |
| Syphilis                                      | Ministry of Health (Brazil). Brazil Hospital Information System 1997. Rio de Janeiro, Brazil: Ministry of Health (Brazil).                                                                                                                                                                                                                                     | Country        | 1993-1997 | Administrative record |
| Syphilis                                      | Madi JM, Souza R da S de, Araújo BF de, Oliveira Filho PF de, Rombaldi RL, Mitchell C, Lorencetti J, Marcon NO. Prevalence of toxoplasmosis, HIV, syphilis and rubella in a population of puerperal women using Whatman 903 filter paper. . 2010; 14(1): 24-9.                                                                                                 |                | 2007-2008 | Scientific literature |
| Syphilis                                      | Miranda AE, Figueiredo NC, Pinto VM, Page K, Talhari S. Risk factors for syphilis in young women attending a family health program in Vitória, Brazil. . 2012; 87(1): 76-83.                                                                                                                                                                                   |                | 2010      | Scientific literature |
| Syphilis                                      | Joint United Nations Program on HIV/AIDS (UNAIDS), Ministry of Health (Brazil). Brazil Progress Report on the Response to HIV/AIDS 2012. Geneva, Switzerland: Joint United Nations Program on HIV/AIDS (UNAIDS), 2012.                                                                                                                                         | Country        | 2012      | Report                |
| Chlamydial infection                          | Institute for Health Metrics and Evaluation (IHME). IHME GBD 2015 DisMod All Causes Excess Mortality Estimates.                                                                                                                                                                                                                                                | Global         | 1990-2016 | Modeled data          |
| Chlamydial infection                          | Guimarães EMB, Guimarães MDC, Vieira MAS, Bontempo NM, Seixas MSS, Garcia MSD, Daud LES, Côrtes RLM, Alves M de FC. Lack of utility of risk score and gynecological examination for screening for sexually transmitted infections in sexually active adolescents. . 2009; 7: 8.                                                                                |                | 2002      | Scientific literature |
| Chlamydial infection                          | De Lima YAR, Turchi MD, Fonseca ZC, Garcia FLB, de Brito e Cardoso FA, da Guarda Reis MN, de Brito Guimarães EM, Alves RRF, Carvalho NR, de Fátima Costa Alves M. Sexually transmitted bacterial infections among young women in Central Western Brazil. . 2014; 16(2): 162-1.                                                                                 |                | 2007-2009 | Scientific literature |
| Chlamydial infection                          | Rodrigues MM, Fernandes PA, Haddad JP, Paiva MC, Souza MIDCM, Andrade TCA, Fernandes AP. Frequency of Chlamydia trachomatis, Neisseria gonorrhoeae, Mycoplasma genitalium, Mycoplasma hominis and Ureaplasma species in cervical samples. . 2011; 31(3): 237-41.                                                                                               |                | 2000-2009 | Scientific literature |
| Chlamydial infection                          | trachomatis prevalence and risk behaviors in parturient women aged 15 to 24 in Brazil. . 2011; 38(10): 957-61.                                                                                                                                                                                                                                                 |                | 2009      | Scientific literature |
| Chlamydial infection                          | Brazil - Seroprevalence Survey of AIDS in Mental Health 2006                                                                                                                                                                                                                                                                                                   | Country        | 2004      | Survey                |
| Chlamydial infection                          | Rocha DAP, Filho RAAB, Mariño JM, dos Santos CMB. Hidden sexually transmitted infections among women in primary care health services, Amazonas, Brazil. . 2014; 25(12): 878-86.                                                                                                                                                                                |                | 2010      | Scientific literature |

|                                     |                                                                                                                                                                                                                                                                                                                                                                                                                     |         |           |                       |
|-------------------------------------|---------------------------------------------------------------------------------------------------------------------------------------------------------------------------------------------------------------------------------------------------------------------------------------------------------------------------------------------------------------------------------------------------------------------|---------|-----------|-----------------------|
| Chlamydial infection                | Borborema-Alfaia APB de, Freitas NS de L, Astolfi Filho S, Borborema-Santos CM. Chlamydia trachomatis infection in a sample of northern Brazilian pregnant women: prevalence and prenatal importance. . 2013; 17(5): 54580.                                                                                                                                                                                         |         | 2005      | Scientific literature |
| Gonococcal infection                | Rocha DAP, Filho RAAB, Mariño JM, dos Santos CMB. Hidden sexually transmitted infections among women in primary care health services, Amazonas, Brazil. . 2014; 25(12): 87886.                                                                                                                                                                                                                                      |         | 2010      | Scientific literature |
| Gonococcal infection                | trachomatis prevalence and risk behaviors in parturient women aged 15 to 24 in Brazil. . 2011; 38(10): 957-61.                                                                                                                                                                                                                                                                                                      |         | 2009      | Scientific literature |
| Gonococcal infection                | Institute for Health Metrics and Evaluation (IHME). IHME GBD 2015 DisMod All Causes Excess Mortality Estimates.                                                                                                                                                                                                                                                                                                     | Global  | 1990-2016 | Modeled data          |
| Gonococcal infection                | De Lima YAR, Turchi MD, Fonseca ZC, Garcia FLB, de Brito e Cardoso FA, da Guarda Reis MN, de Brito Guimarães EM, Alves RRF, Carvalho NR, de Fátima Costa Alves M. Sexually transmitted bacterial infections among young women in Central Western Brazil. . 2014; 1621.                                                                                                                                              |         | 2007-2009 | Scientific literature |
| Gonococcal infection                | Brazil - Seroprevalence Survey of AIDS in Mental Health 2006                                                                                                                                                                                                                                                                                                                                                        | Country | 2004      | Survey                |
| Gonococcal infection                | Guimarães EMB, Guimarães MDC, Vieira MAS, Bontempo NM, Seixas MSS, Garcia MSD, Daud LES, Côrtes RLM, Alves M de FC. Lack of utility of risk score and gynecological examination for screening for sexually transmitted infections in sexually active adolescents. . 2009; 7: 8.                                                                                                                                     |         | 2002      | Scientific literature |
| Trichomoniasis                      | Miranda AE, Pinto TM, Gaydos CA. Trichomonas vaginalis infection among young pregnant women in Brazil. . 2014; 18(6): 66921.                                                                                                                                                                                                                                                                                        |         | 2009      | Scientific literature |
| Trichomoniasis                      | Gramá DF, Casarotti L da S, Morato MG de A, Silva LS, Mendonça DF, Limongi JE, Viana J da C, Cury MC. Prevalence of Trichomonas vaginalis and risk factors in women treated at public health units in Brazil: a transversal study. . 2013; 107(9): 58481.                                                                                                                                                           |         | 2009-2010 | Scientific literature |
| Trichomoniasis                      | Rocha DAP, Filho RAAB, Mariño JM, dos Santos CMB. Hidden sexually transmitted infections among women in primary care health services, Amazonas, Brazil. . 2014; 25(12): 87886.                                                                                                                                                                                                                                      |         | 2010      | Scientific literature |
| Trichomoniasis                      | Mascarenhas REM, Machado MSC, Costa e Silva BFB da, Pimentel RW, Ferreira TT, Leoni FMS, Grassi MFR. Prevalence and risk factors for bacterial vaginosis and other vulvovaginitis in a population of sexually active adolescents from Salvador, Bahia, Brazil. . 2012; 378640.                                                                                                                                      |         | 2008-2010 | Scientific literature |
| Genital herpes                      | Smith JS, Herrero R, Bosetti C, Muñoz N, Bosch FX, Eluf-Neto J, Castellsagué X, Meijer CILM, Van den Brule AIC, Franceschi S, Ashley R, International Agency for Research on Cancer (IARC) Multicentric Cervical Cancer Study Group. Herpes simplex virus-2 as a human papillomavirus cofactor in the etiology of invasive cervical cancer. . 2002; 94(21): 16043.                                                  |         | 1999-2001 | Scientific literature |
| Genital herpes                      | Nascimento MC, Sumita LM, Souza VU, Weiss HA, Oliveira J, Mascheretti M, Quiroga M, Vela RAR, Sabino E, Pannuti CS, Mayaud P. Seroprevalence of Kaposi sarcoma-associated herpesvirus and other serologic markers in the Brazilian Amazon. . 2009; 15(4): 6632.                                                                                                                                                     |         | 2003-2004 | Scientific literature |
| Genital herpes                      | Alberts CJ, Schim van der Loeff MF, Papenfuss MR, da Silva RJC, Villa LL, Lazcano-Ponce E, Nyitrai AG, Giuliano AR. Association of Chlamydia trachomatis infection and herpes simplex virus type 2 serostatus with genital human papillomavirus infection in men: the HPV in men study. . 2013; 40(6): 5085.                                                                                                        |         | 2005-2009 | Scientific literature |
| Genital herpes                      | Benzaken A, Sabido M, Galban E, Rodrigues Dutra DL, Leturiondo AL, Mayaud P. HIV and sexually transmitted infections at the borderlands: situational analysis of sexual health in the Brazilian Amazon. . 2012; 88(4): 294300.                                                                                                                                                                                      |         | 2009      | Scientific literature |
| Genital herpes                      | Lupi O. Prevalence and risk factors for herpes simplex infection among patients at high risk for HIV infection in Brazil. . 2011; 50(6): 70923.                                                                                                                                                                                                                                                                     |         | 1996-1997 | Scientific literature |
| Genital herpes                      | Clemens SAC, Farhat CK. Seroprevalence of herpes simplex 1-2 antibodies in Brazil. . 2010; 44(4): 72634.                                                                                                                                                                                                                                                                                                            |         | 1996-1997 | Scientific literature |
| Genital herpes                      | immunodeficiency virus test-seeking motivation in blood donors, São Paulo, Brazil. . 2006; 90(3): 170-6.                                                                                                                                                                                                                                                                                                            |         | 2004      | Scientific literature |
| Genital herpes                      | WS, Tateno A, Boulos M, Mayaud P, Pannuti CS. Human herpesvirus-8 infection and oral shedding in Amerindian and non-Amerindian populations in the Brazilian Amazon region. . 2007; 196(6): 844-52.                                                                                                                                                                                                                  |         | 2003-2004 | Scientific literature |
| Genital herpes                      | 2 infection in pregnancy: asymptomatic viral excretion at delivery and seroepidemiologic survey of two socioeconomically distinct populations in São Paulo, Brazil. . 1993; 35(3): 285-90.                                                                                                                                                                                                                          |         | 1988-1989 | Scientific literature |
| Genital herpes                      | Smith JS, Herrero R, Muñoz N, Eluf-Neto J, Ngalangel C, Bosch FX, Ashley RL. Prevalence and risk factors for herpes simplex virus type 2 infection among middle-age women in Brazil and the Philippines. . 2001; 28(4): 187-94.                                                                                                                                                                                     |         | 1990-1991 | Scientific literature |
| Genital herpes                      | Cowan FM, French RS, Mayaud P, Gopal R, Robinson NJ, de Oliveira SA, Fallace T, Uuskula A, Nygård-Kibur M, Ramalingam S, Sridharan G, El Aouad R, Alami K, Rbai M, Sunil-Chandra NP, Brown DW. Seroepidemiological study of herpes simplex virus types 1 and 2 in Brazil, Estonia, India, Morocco, and Sri Lanka. . 2003; 79(4): 286-90.                                                                            |         | 2000      | Scientific literature |
| Other sexually transmitted diseases | Institute for Health Metrics and Evaluation (IHME). IHME GBD 2015 DisMod All Causes Excess Mortality Estimates.                                                                                                                                                                                                                                                                                                     | Global  | 1990-2016 | Modeled data          |
| Acute hepatitis A                   | LP, Amado LA, Engstrom EM, Fortes CDFM, Souza TC de, Dias MN, Gaspar AMC, Souto FJD. Declining prevalence of hepatitis A virus antibodies among children from low socioeconomic groups reinforces the need for the implementation of hepatitis A vaccination in Brazil. . 2012; 107(5): 6528.                                                                                                                       |         | 2007-2009 | Scientific literature |
| Acute hepatitis A                   | Vitral CL, da Silva-Nunes M, Pinto MA, de Oliveira JM, Gaspar AMC, Pereira RCC, Ferreira MU. Hepatitis A and E seroprevalence and associated risk factors: a community-based cross-sectional survey in rural Amazonia. . 2014; 14: 458.                                                                                                                                                                             |         | 2004      | Scientific literature |
| Acute hepatitis A                   | Mantovani SAS, Delfino BM, Martins AC, Oliart-Guzmán H, Pereira TM, Branco FLCC, Braña AM, Figueira-Júnior JA, Santos AP, Arruda RA, Guimarães AS, Ramalho AA, Oliveira CS de M, Araújo TS, Arróspide N, Estrada CHML, Codeço CT, da Silva-Nunes M. Socioeconomic inequities and hepatitis A virus infection in Western Brazilian Amazonian children: spatial distribution and associated factors. . 2015; 15: 428. |         | 2011      | Scientific literature |
| Acute hepatitis A                   | Pinheiro RS, Araújo LA de, Caetano KAA, Matos MA de, Carneiro MADS, Teles SA. INTERMEDIATE ENDEMICITY OF HEPATITIS A VIRUS INFECTION IN RURAL SETTLEMENT PROJECTS OF SOUTHWEST GOIÁS, BRAZIL. . 2015; 52(3): 2008.                                                                                                                                                                                                  |         | 2011      | Scientific literature |
| Acute hepatitis A                   | Pereira TM, Mantovani SAS, Branco FLCC, Braña AM, Oliart-Guzmán H, Delfino BM, Martins AC, Araújo TS, Oliveira CSM, Muniz PT, da Silva-Nunes M. Hepatitis A seroprevalence in preschool children in Assis Brazil, Acre, Brazil, in 2003 and 2010. . 2015.                                                                                                                                                           |         | 2003-2010 | Scientific literature |
| Acute hepatitis A                   | Moreira ED Jr, Nassif VB, Santos RS, Matos JF, de Carvalho WA, Silvani CS, Santana e Sant'ana C. Association of Helicobacter pylori infection and giardiasis: results from a study of surrogate markers for fecal exposure among children. . 2005; 11(18): 2759-63.                                                                                                                                                 |         | 2001-2002 | Scientific literature |
| Acute hepatitis A                   | Black FL, Jacobson DL. Hepatitis A antibody in an isolated Amerindian tribe fifty years after exposure. . 1986; 19(1): 19-21.                                                                                                                                                                                                                                                                                       |         | 1983-1984 | Scientific literature |
| Acute hepatitis A                   | Gonçalves AAS, Oliveira LCM de. Seroprevalence of hepatitis A immunity among children and adolescents in two cities of the Triângulo Mineiro region, state of Minas Gerais, Brazil. . 2012; 16(5): 496-7.                                                                                                                                                                                                           |         | 2010-2011 | Scientific literature |
| Acute hepatitis A                   | Gomes MAC, Ferreira A de SP, da Silva AAM, de Souza ER. Hepatitis A: seroprevalence and associated factors among schoolchildren of São Luís (MA), Brazil. . 2011; 14(4): 548-55.                                                                                                                                                                                                                                    |         | 2002-2004 | Scientific literature |
| Acute hepatitis A                   | Markus JR, Cruz CR, Maluf EMCP, Tahan TT, Hoffmann MM. Seroprevalence of hepatitis A in children and adolescents. . 2011; 87(5): 419-24.                                                                                                                                                                                                                                                                            |         | 2006      | Scientific literature |
| Acute hepatitis A                   | De Alencar Ximenes RA, Martelli CMT, Merchán-Hamann E, Montarroyos UR, Braga MC, de Lima MLC, Cardoso MRA, Turchi MD, Costa MA, de Alencar LCA, Moreira RC, Figueiredo GM, Pereira LMBS. Multilevel analysis of hepatitis A infection in children and adolescents: a household survey in the Northeast and Central-west regions of Brazil. . 2008; 37(4): 852-61.                                                   |         | 2004-2005 | Scientific literature |
| Hepatitis B                         | Dos Santos JI, Lopes MA, Deliége-Vasconcelos E, Couto-Fernandez JC, Patel BN, Barreto ML, Ferreira Júnior OC, Galvão-Castro B. Seroprevalence of HIV, HTLV-III and other perinatally-transmitted pathogens in Salvador, Bahia. . 1995; 37(4): 343-8.                                                                                                                                                                |         | 1990-1991 | Scientific literature |
| Hepatitis B                         | Coimbra Júnior CE, Santos RV, Yoshida CF, Baptista ML, Flowers NM, do Valle AC. Hepatitis B epidemiology and cultural practices in Amerindian populations of Amazonia: the Tupi-Mondé and the Xavante from Brazil. . 1996; 42(12): 1735-43.                                                                                                                                                                         |         | 1990      | Scientific literature |
| Hepatitis B                         | serological markers of hepatitis B virus in pregnant women from Paraná State, Brazil. . 2006; 39(8): 1083-90.                                                                                                                                                                                                                                                                                                       |         | 1998-2002 | Scientific literature |
| Hepatitis B                         | Aquino JA, Pegado KA, Barros LP, Machado LFA. Soroprevalência de infecções por vírus da hepatite B e vírus da hepatite C em indivíduos do Estado do Pará. . 2008; 334-7.                                                                                                                                                                                                                                            |         | 2002-2005 | Scientific literature |
| Hepatitis B                         | A, Spada C, Treitinger A. Hepatitis B marker seroprevalence and vaccination coverage in adolescents in the City of Itajaí, State of Santa Catarina, Southern Brazil, in 2008. . 2011; 44(4): 416-9.                                                                                                                                                                                                                 |         | 2008      | Scientific literature |
| Hepatitis B                         | Seroprevalence of hepatitis B and hepatitis C markers in adolescents in Southern Brazil. . 2011; 27(4): 753-8.                                                                                                                                                                                                                                                                                                      |         | 2008      | Scientific literature |
| Hepatitis B                         | De Souza NCN, Botelho CAD, Honer MR. Retrospective study of a pioneer antenatal screening program with 8 477 pregnant women in Brazil. . 2004; 31(3): 217-20.                                                                                                                                                                                                                                                       |         | 2002-2003 | Scientific literature |
| Hepatitis B                         | Braga WSM, Castilho M da C, Borges FG, Martinho AC de S, Rodrigues IS, Azevedo EP de, Scazufca M, Menezes PR. Prevalence of hepatitis B virus infection and carriage after nineteen years of vaccination program in the Western Brazilian Amazon. . 2012; 45(1): 13-7.                                                                                                                                              |         | 2005-2007 | Scientific literature |

|                                                    |                                                                                                                                                                                                                                                                                                                                                |                    |           |                       |
|----------------------------------------------------|------------------------------------------------------------------------------------------------------------------------------------------------------------------------------------------------------------------------------------------------------------------------------------------------------------------------------------------------|--------------------|-----------|-----------------------|
| Hepatitis C                                        | Pereira LM, Martelli CMT, Moreira RC, Merchan-Hamman E, Stein AT, Cardoso MRA, Figueiredo GM, Montarroyos UR, Braga C, Turchi MD, Coral G, Crespo D, Lima MLC, Alencar LCA, Costa M, dos Santos AA, Ximenes RAA. Prevalence and risk factors of Hepatitis C virus infection in Brazil, 2005 through 2009: a cross-sectional study. . 2013; 60. |                    | 2005-2009 | Scientific literature |
| Hepatitis C                                        | Carvalho MB, Hamerschlag N, Vaz RS, Ferreira OC Jr. Risk factor analysis and serological diagnosis of HIV-1/HIV-2 infection in a Brazilian blood donor population: validation of the World Health Organization strategy for HIV testing. . 1996; 10(10): 1135-40.                                                                              |                    | 1992-1993 | Scientific literature |
| Hepatitis C                                        | Martins RM, Vanderborght BO, Rouzere C, Cardoso DD, Azevedo MS, Yoshida CF. Anti-HCV prevalence and risk factors analysis in pregnant women in central Brazil. . 1995; 90(1): 11.                                                                                                                                                              |                    | 1990-1992 | Scientific literature |
| Hepatitis C                                        | Institute for Health Metrics and Evaluation (IHME). IHME GBD 2013 DisMod model input - Hepatitis C.                                                                                                                                                                                                                                            | Global             | 1990-2015 | Modeled data          |
| Hepatitis C                                        | Menegol D, Spilki FR. Seroprevalence of Hepatitis B and C markers at the population level in the municipality of Caxias do Sul, southern Brazil. . 2013; 44(4): 1237-40.                                                                                                                                                                       |                    | 2008-2011 | Scientific literature |
| Hepatitis C                                        | Aquino JA, Pegado KA, Barros LP, Machado LFA. Soroprevalência de infecções por vírus da hepatite B e vírus da hepatite C em indivíduos do Estado do Pará. . 2008; 334-7.                                                                                                                                                                       |                    | 2002-2005 | Scientific literature |
| Hepatitis C                                        | De Souza NCN, Botelho CAD, Honer MR. Retrospective study of a pioneer antenatal screening program with 8,477 pregnant women in Brazil. . 2004; 31(3): 217-20.                                                                                                                                                                                  |                    | 2002-2003 | Scientific literature |
| Acute hepatitis E                                  | Parana R, Cotrim HP, Cortez-Boenke ML, Trepo C, Lyra L. Prevalence of hepatitis E virus IgG antibodies in patients from a referral unit of liver diseases in Salvador, Bahia, Brazil. . 1997; 57(1): 60-1.                                                                                                                                     | Country            | 1992-1994 | Scientific literature |
| Colon and rectum cancer                            | Institute for Health Metrics and Evaluation (IHME). IHME GBD 2015 DisMod Cancer Procedure Incidence Estimates.                                                                                                                                                                                                                                 | Global             | 1990-2020 | Modeled data          |
| Liver cancer due to hepatitis B                    | Gonçalves PL, Zago-Gomes Mda P, Gonçalves CS, Pereira FE. Hepatitis virus and hepatocellular carcinoma in Brazil: a report from the State of Espírito Santo. . 2014; 47(5): 559-63.                                                                                                                                                            |                    | 1993-2011 | Scientific literature |
| Liver cancer due to hepatitis B                    | Gonçalves CS, Pereira FE, Gayotto LC. Hepatocellular carcinoma in Brazil: report of a national survey (Florianópolis, SC, 1995). . 1997; 39(3): 165-70.                                                                                                                                                                                        |                    | 1992-1994 | Scientific literature |
| Liver cancer due to hepatitis B                    | MTF, da Cruz E do RM, Demachki S, Bensabath G, Soares M do CP. [Hepatitis B and C virus infection and the hepatocellular carcinoma in the East Amazon, Brazil]. . 2004; 37(Suppl 2): 47-51.                                                                                                                                                    |                    | 1992-1999 | Scientific literature |
| Liver cancer due to hepatitis B                    | Osório FMF, Lauer GM, Lima AS, Vidigal PVT, Ferrari TCA, Couto CA. Epidemiological aspects of hepatocellular carcinoma in a referral center of Minas Gerais, Brazil. . 2013; 50(2): 97-100.                                                                                                                                                    |                    | 1998-2010 | Scientific literature |
| Liver cancer due to hepatitis B                    | Fontes PR, Schmidt Cerski CT, Hartmann AA, Kretzmann Filho NA. Evaluation of the C3435T polymorphism in the MDR1 gene in patients with hepatocellular carcinoma. . 2012; 11(6): 899-906.                                                                                                                                                       |                    | 2000-2009 | Scientific literature |
| Liver cancer due to hepatitis B                    | Clinical and epidemiological aspects of hepatocellular carcinoma in Brazil. . 2010; 65(12): 1285-90.                                                                                                                                                                                                                                           |                    | 2004-2009 | Scientific literature |
| Liver cancer due to hepatitis B                    | Hepatitis G virus infection in patients with hepatocellular carcinoma in Recife, Brazil. . 2007; 37(8): 632-6.                                                                                                                                                                                                                                 | Country            | 1996-1999 | Scientific literature |
| Liver cancer due to hepatitis B                    | Silva M, Mattos AA de, Fontes PRO, Waechter FL, Pereira-Lima L. Evaluation of hepatic resection for hepatocellular carcinoma on cirrhotic livers. . 2008; 45(2): 99-105.                                                                                                                                                                       |                    | 1996-2005 | Scientific literature |
| Liver cancer due to hepatitis C                    | Fontes PR, Schmidt Cerski CT, Hartmann AA, Kretzmann Filho NA. Evaluation of the C3435T polymorphism in the MDR1 gene in patients with hepatocellular carcinoma. . 2012; 11(6): 899-906.                                                                                                                                                       |                    | 2000-2009 | Scientific literature |
| Liver cancer due to hepatitis C                    | Gonçalves PL, Zago-Gomes Mda P, Gonçalves CS, Pereira FE. Hepatitis virus and hepatocellular carcinoma in Brazil: a report from the State of Espírito Santo. . 2014; 47(5): 559-63.                                                                                                                                                            |                    | 1993-2011 | Scientific literature |
| Liver cancer due to hepatitis C                    | Hepatitis G virus infection in patients with hepatocellular carcinoma in Recife, Brazil. . 2007; 37(8): 632-6.                                                                                                                                                                                                                                 | Country            | 1996-1999 | Scientific literature |
| Liver cancer due to hepatitis C                    | Osório FMF, Lauer GM, Lima AS, Vidigal PVT, Ferrari TCA, Couto CA. Epidemiological aspects of hepatocellular carcinoma in a referral center of Minas Gerais, Brazil. . 2013; 50(2): 97-100.                                                                                                                                                    |                    | 1998-2010 | Scientific literature |
| Liver cancer due to hepatitis C                    | MTF, da Cruz E do RM, Demachki S, Bensabath G, Soares M do CP. [Hepatitis B and C virus infection and the hepatocellular carcinoma in the East Amazon, Brazil]. . 2004; 37(Suppl 2): 47-51.                                                                                                                                                    |                    | 1992-1999 | Scientific literature |
| Liver cancer due to hepatitis C                    | Silva M, Mattos AA de, Fontes PRO, Waechter FL, Pereira-Lima L. Evaluation of hepatic resection for hepatocellular carcinoma on cirrhotic livers. . 2008; 45(2): 99-105.                                                                                                                                                                       |                    | 1996-2005 | Scientific literature |
| Liver cancer due to hepatitis C                    | Clinical and epidemiological aspects of hepatocellular carcinoma in Brazil. . 2010; 65(12): 1285-90.                                                                                                                                                                                                                                           |                    | 2004-2009 | Scientific literature |
| Liver cancer due to hepatitis C                    | Gonçalves CS, Pereira FE, Gayotto LC. Hepatocellular carcinoma in Brazil: report of a national survey (Florianópolis, SC, 1995). . 1997; 39(3): 165-70.                                                                                                                                                                                        |                    | 1992-1994 | Scientific literature |
| Liver cancer due to alcohol use                    | Osório FMF, Lauer GM, Lima AS, Vidigal PVT, Ferrari TCA, Couto CA. Epidemiological aspects of hepatocellular carcinoma in a referral center of Minas Gerais, Brazil. . 2013; 50(2): 97-100.                                                                                                                                                    |                    | 1998-2010 | Scientific literature |
| Liver cancer due to alcohol use                    | Hepatitis G virus infection in patients with hepatocellular carcinoma in Recife, Brazil. . 2007; 37(8): 632-6.                                                                                                                                                                                                                                 | Country            | 1996-1999 | Scientific literature |
| Liver cancer due to alcohol use                    | Gonçalves CS, Pereira FE, Gayotto LC. Hepatocellular carcinoma in Brazil: report of a national survey (Florianópolis, SC, 1995). . 1997; 39(3): 165-70.                                                                                                                                                                                        |                    | 1992-1994 | Scientific literature |
| Liver cancer due to alcohol use                    | Silva M, Mattos AA de, Fontes PRO, Waechter FL, Pereira-Lima L. Evaluation of hepatic resection for hepatocellular carcinoma on cirrhotic livers. . 2008; 45(2): 99-105.                                                                                                                                                                       |                    | 1996-2005 | Scientific literature |
| Liver cancer due to alcohol use                    | Clinical and epidemiological aspects of hepatocellular carcinoma in Brazil. . 2010; 65(12): 1285-90.                                                                                                                                                                                                                                           |                    | 2004-2009 | Scientific literature |
| Liver cancer due to alcohol use                    | Fontes PR, Schmidt Cerski CT, Hartmann AA, Kretzmann Filho NA. Evaluation of the C3435T polymorphism in the MDR1 gene in patients with hepatocellular carcinoma. . 2012; 11(6): 899-906.                                                                                                                                                       |                    | 2000-2009 | Scientific literature |
| Liver cancer due to alcohol use                    | Gonçalves PL, Zago-Gomes Mda P, Gonçalves CS, Pereira FE. Hepatitis virus and hepatocellular carcinoma in Brazil: a report from the State of Espírito Santo. . 2014; 47(5): 559-63.                                                                                                                                                            |                    | 1993-2011 | Scientific literature |
| Liver cancer due to other causes                   | Gonçalves PL, Zago-Gomes Mda P, Gonçalves CS, Pereira FE. Hepatitis virus and hepatocellular carcinoma in Brazil: a report from the State of Espírito Santo. . 2014; 47(5): 559-63.                                                                                                                                                            |                    | 1993-2011 | Scientific literature |
| Liver cancer due to other causes                   | Clinical and epidemiological aspects of hepatocellular carcinoma in Brazil. . 2010; 65(12): 1285-90.                                                                                                                                                                                                                                           |                    | 2004-2009 | Scientific literature |
| Liver cancer due to other causes                   | Silva M, Mattos AA de, Fontes PRO, Waechter FL, Pereira-Lima L. Evaluation of hepatic resection for hepatocellular carcinoma on cirrhotic livers. . 2008; 45(2): 99-105.                                                                                                                                                                       |                    | 1996-2005 | Scientific literature |
| Liver cancer due to other causes                   | Fontes PR, Schmidt Cerski CT, Hartmann AA, Kretzmann Filho NA. Evaluation of the C3435T polymorphism in the MDR1 gene in patients with hepatocellular carcinoma. . 2012; 11(6): 899-906.                                                                                                                                                       |                    | 2000-2009 | Scientific literature |
| Liver cancer due to other causes                   | Osório FMF, Lauer GM, Lima AS, Vidigal PVT, Ferrari TCA, Couto CA. Epidemiological aspects of hepatocellular carcinoma in a referral center of Minas Gerais, Brazil. . 2013; 50(2): 97-100.                                                                                                                                                    |                    | 1998-2010 | Scientific literature |
| Liver cancer due to other causes                   | Gonçalves CS, Pereira FE, Gayotto LC. Hepatocellular carcinoma in Brazil: report of a national survey (Florianópolis, SC, 1995). . 1997; 39(3): 165-70.                                                                                                                                                                                        |                    | 1992-1994 | Scientific literature |
| Liver cancer due to other causes                   | Hepatitis G virus infection in patients with hepatocellular carcinoma in Recife, Brazil. . 2007; 37(8): 632-6.                                                                                                                                                                                                                                 | Country            | 1996-1999 | Scientific literature |
| Larynx cancer                                      | Institute for Health Metrics and Evaluation (IHME). IHME GBD 2015 DisMod Cancer Procedure Incidence Estimates.                                                                                                                                                                                                                                 | Global             | 1990-2020 | Modeled data          |
| Non-melanoma skin cancer (squamous-cell carcinoma) | Minas Gerais Ministry of Health (Brazil), National Cancer Institute (Brazil). Brazil - Belo Horizonte BasePopWeb Database - Population Based Cancer Registry (RCPB Belo Horizonte) Statistics. Rio de Janeiro, Brazil: National Cancer Institute (Brazil).                                                                                     | Minas Gerais       | 2000-2008 | Disease registry      |
| Non-melanoma skin cancer (squamous-cell carcinoma) | National Cancer Institute (Brazil). Brazil - Distrito Federal BasePopWeb Database - Population Based Cancer Registry (RCPB Distrito Federal) Statistics. Rio de Janeiro, Brazil: National Cancer Institute (Brazil).                                                                                                                           | Distrito Federal   | 1999-2002 | Disease registry      |
| Non-melanoma skin cancer (squamous-cell carcinoma) | Municipal Secretariat of Health of Curitiba (Brazil), National Cancer Institute (Brazil). Brazil - Curitiba BasePopWeb Database - Population Based Cancer Registry (RCPB Curitiba) Statistics. Rio de Janeiro, Brazil: National Cancer Institute (Brazil).                                                                                     | Paraná             | 1998-2010 | Disease registry      |
| Non-melanoma skin cancer (squamous-cell carcinoma) | Association to Fight Cancer in Goiás (Brazil), National Cancer Institute (Brazil). Brazil - Goiás BasePopWeb Database - Population Based Cancer Registry (RCPB Goiás) Statistics. Rio de Janeiro, Brazil: National Cancer Institute (Brazil).                                                                                                  | Goiás              | 1990-2009 | Disease registry      |
| Non-melanoma skin cancer (squamous-cell carcinoma) | National Cancer Institute (Brazil). Brazil - Espírito Santo BasePopWeb Database - Population Based Cancer Registry (RCPB do Estado do Espírito Santo) Statistics. Rio de Janeiro, Brazil: National Cancer Institute (Brazil).                                                                                                                  | Espirito Santo     | 1997-2012 | Disease registry      |
| Non-melanoma skin cancer (squamous-cell carcinoma) | Cancer Registry (RCPB Cuiaba) Statistics. Rio de Janeiro, Brazil: National Cancer Institute (Brazil).                                                                                                                                                                                                                                          | Mato Grosso        | 2000-2007 | Disease registry      |
| Non-melanoma skin cancer (squamous-cell carcinoma) | Mato Grosso do Sul State Department of Health (Brazil), National Cancer Institute (Brazil). Brazil - Campo Grande BasePopWeb Database - Population Based Cancer Registry (RCPB Campo Grande) Statistics. Rio de Janeiro, Brazil: National Cancer Institute (Brazil).                                                                           | Mato Grosso Do Sul | 2001-2009 | Disease registry      |
| Non-melanoma skin cancer (squamous-cell carcinoma) | Cancer Registry (RCPB Fortaleza) Statistics. Rio de Janeiro, Brazil: National Cancer Institute (Brazil).                                                                                                                                                                                                                                       | Ceará              | 1990-2006 | Disease registry      |
| Non-melanoma skin cancer (squamous-cell carcinoma) | National Cancer Institute (Brazil). Brazil - Florianópolis BasePopWeb Database - Population Based Cancer Registry (RCPB Florianópolis) Statistics. Rio de Janeiro, Brazil: National Cancer Institute (Brazil).                                                                                                                                 | Santa Catarina     | 2008-2012 | Disease registry      |



|                                                    |                                                                                                                                                                                                                                                                                                                                          |                     |           |                  |
|----------------------------------------------------|------------------------------------------------------------------------------------------------------------------------------------------------------------------------------------------------------------------------------------------------------------------------------------------------------------------------------------------|---------------------|-----------|------------------|
| Non-melanoma skin cancer (squamous-cell carcinoma) | National Cancer Institute (Brazil). Brazil - Poços de Caldas BasePopWeb Database - Population Based Cancer Registry (RCBP Poços de Caldas) Statistics. Rio de Janeiro, Brazil: National Cancer Institute (Brazil).                                                                                                                       | Minas Gerais        | 2007-2011 | Disease registry |
| Non-melanoma skin cancer (squamous-cell carcinoma) | National Cancer Institute (Brazil), Rio Grande do Sul State Center for Health Surveillance (CEVS) (Brazil), Rio Grande do Sul State Health Department (Brazil). Brazil - Porto Alegre BasePopWeb Database - Population Based Cancer Registry (RCBP Porto Alegre) Statistics. Rio de Janeiro, Brazil: National Cancer Institute (Brazil). | Rio Grande do Sul   | 1994-2006 | Disease registry |
| Non-melanoma skin cancer (squamous-cell carcinoma) | Aristides Maltez Hospital (Brazil), Bahia League Against Cancer (Brazil), National Cancer Institute (Brazil). Brazil - Salvador BasePopWeb Database - Population Based Cancer Registry (RCBP Salvador) Statistics. Rio de Janeiro, Brazil: National Cancer Institute (Brazil).                                                           | Bahia               | 1996-2005 | Disease registry |
| Non-melanoma skin cancer (squamous-cell carcinoma) | Cancer Registry (RCBP Roraima) Statistics. Rio de Janeiro, Brazil: National Cancer Institute (Brazil).                                                                                                                                                                                                                                   | Roraima             | 2003-2009 | Disease registry |
| Non-melanoma skin cancer (squamous-cell carcinoma) | Cancer Registry (RCBP Recife) Statistics. Rio de Janeiro, Brazil: National Cancer Institute (Brazil).                                                                                                                                                                                                                                    | Pernambuco          | 1996-2010 | Disease registry |
| Non-melanoma skin cancer (squamous-cell carcinoma) | National Cancer Institute (Brazil), São Paulo Population Based Cancer Registry. Brazil - Sao Paulo BasePopWeb Database - Population Based Cancer Registry (RCBP-SP) Statistics. Rio de Janeiro, Brazil: National Cancer Institute (Brazil).                                                                                              | São Paulo           | 1997-2010 | Disease registry |
| Non-melanoma skin cancer (squamous-cell carcinoma) | Institute for Health Metrics and Evaluation (IHME). IHME GBD 2013 DisMod model input. Cancer incidence in Five Continents Volumes I-VIII 1950-1997                                                                                                                                                                                       | Global              | 1990-2013 | Modeled data     |
| Non-melanoma skin cancer (squamous-cell carcinoma) | São Paulo Population Based Cancer Registry. Brazil - Sao Paulo Population Based Cancer Registry Statistics. São Paulo, Brazil: São Paulo Population Based Cancer Registry.                                                                                                                                                               | Global              | 1973-1998 | Disease registry |
| Non-melanoma skin cancer (squamous-cell carcinoma) | Health Department of the State of Paraíba (Brazil), National Cancer Institute (Brazil). Brazil - João Pessoa BasePopWeb Database - Population Based Cancer Registry (RCBP João Pessoa) Statistics. Rio de Janeiro, Brazil: National Cancer Institute (Brazil).                                                                           | São Paulo           | 2011      | Disease registry |
| Non-melanoma skin cancer (squamous-cell carcinoma) | Amazonas State Foundation Oncology Control Center (FCECON), National Cancer Institute (Brazil). Brazil - Manaus BasePopWeb Database - Population Based Cancer Registry (RCBP Manaus) Statistics. Rio de Janeiro, Brazil: National Cancer Institute (Brazil).                                                                             | Paraíba             | 1999-2006 | Disease registry |
| Non-melanoma skin cancer (squamous-cell carcinoma) | National Cancer Institute (Brazil). Brazil - Natal BasePopWeb Database - Population Based Cancer Registry (RCBP Natal) Statistics. Rio de Janeiro, Brazil: National Cancer Institute (Brazil).                                                                                                                                           | Amazonas            | 1999-2006 | Disease registry |
| Non-melanoma skin cancer (squamous-cell carcinoma) | Ministry of Health of Tocantins (Brazil), National Cancer Institute (Brazil). Brazil - Palmas BasePopWeb Database - Population Based Cancer Registry (RCBP Palmas) Statistics. Rio de Janeiro, Brazil: National Cancer Institute (Brazil).                                                                                               | Rio Grande do Norte | 1999-2005 | Disease registry |
| Non-melanoma skin cancer (squamous-cell carcinoma) | National Cancer Institute (Brazil), Pará State Department of Public Health (SESAP) (Brazil). Brazil - Belém BasePopWeb Database - Population Based Cancer Registry (RCBP Belém) Statistics. Rio de Janeiro, Brazil: National Cancer Institute (Brazil).                                                                                  | Tocantins           | 2001-2005 | Disease registry |
| Non-melanoma skin cancer (squamous-cell carcinoma) | National Cancer Institute (Brazil), Oncology Center, Sergipe Emergency Hospital (Brazil). Brazil - Aracaju BasePopWeb Database - Population Based Cancer Registry (RCBP Aracaju) Statistics. Rio de Janeiro, Brazil: National Cancer Institute (Brazil).                                                                                 | Pará                | 1996-2009 | Disease registry |
| Non-melanoma skin cancer (squamous-cell carcinoma) | Amaral Carvalho Hospital (Brazil), National Cancer Institute (Brazil), Secretary of Municipal Health of Jau (Brazil). Brazil - Jahu BasePopWeb Database - Population Based Cancer Registry (RCBP Jahu) Statistics. Rio de Janeiro, Brazil: National Cancer Institute (Brazil).                                                           | Sergipe             | 1996-2012 | Disease registry |
| Non-melanoma skin cancer (squamous-cell carcinoma) | Cancer Registry (RCBP DRS Barretos) Statistics. Rio de Janeiro, Brazil: National Cancer Institute (Brazil).                                                                                                                                                                                                                              | São Paulo           | 1996-2012 | Disease registry |
| Non-melanoma skin cancer (squamous-cell carcinoma) | Cancer Registry (RCBP Teresina) Statistics. Rio de Janeiro, Brazil: National Cancer Institute (Brazil).                                                                                                                                                                                                                                  | São Paulo           | 2008-2013 | Disease registry |
| Non-melanoma skin cancer (squamous-cell carcinoma) | Cancer Registry (RCBP Santos) Statistics. Rio de Janeiro, Brazil: National Cancer Institute (Brazil).                                                                                                                                                                                                                                    | Piauí               | 2001-2005 | Disease registry |
| Non-melanoma skin cancer (squamous-cell carcinoma) | National Cancer Institute (Brazil). Brazil - Florianópolis BasePopWeb Database - Population Based Cancer Registry (RCBP Florianópolis) Statistics. Rio de Janeiro, Brazil: National Cancer Institute (Brazil).                                                                                                                           | São Paulo           | 2008-2009 | Disease registry |
| Non-melanoma skin cancer (basal-cell carcinoma)    | National Cancer Institute (Brazil). Brazil - Distrito Federal BasePopWeb Database - Population Based Cancer Registry (RCBP Distrito Federal) Statistics. Rio de Janeiro, Brazil: National Cancer Institute (Brazil).                                                                                                                     | Santa Catarina      | 2008-2012 | Disease registry |
| Non-melanoma skin cancer (basal-cell carcinoma)    | Cancer Registry (RCBP Teresina) Statistics. Rio de Janeiro, Brazil: National Cancer Institute (Brazil).                                                                                                                                                                                                                                  | Distrito Federal    | 1999-2002 | Disease registry |
| Non-melanoma skin cancer (basal-cell carcinoma)    | Municipal Secretariat of Health of Curitiba (Brazil), National Cancer Institute (Brazil). Brazil - Curitiba BasePopWeb Database - Population Based Cancer Registry (RCBP Curitiba) Statistics. Rio de Janeiro, Brazil: National Cancer Institute (Brazil).                                                                               | Piauí               | 2000-2006 | Disease registry |
| Non-melanoma skin cancer (basal-cell carcinoma)    | National Cancer Institute (Brazil), Rio Grande do Sul State Center for Health Surveillance (CEVS) (Brazil), Rio Grande do Sul State Health Department (Brazil). Brazil - Porto Alegre BasePopWeb Database - Population Based Cancer Registry (RCBP Porto Alegre) Statistics. Rio de Janeiro, Brazil: National Cancer Institute (Brazil). | Paraná              | 1998-2010 | Disease registry |
| Non-melanoma skin cancer (basal-cell carcinoma)    | Cancer Registry (RCBP Recife) Statistics. Rio de Janeiro, Brazil: National Cancer Institute (Brazil).                                                                                                                                                                                                                                    | Rio Grande do Sul   | 1993-2006 | Disease registry |
| Non-melanoma skin cancer (basal-cell carcinoma)    | Cancer Registry (RCBP Cuiabá) Statistics. Rio de Janeiro, Brazil: National Cancer Institute (Brazil).                                                                                                                                                                                                                                    | Pernambuco          | 1995-2010 | Disease registry |
| Non-melanoma skin cancer (basal-cell carcinoma)    | Cancer Registry (RCBP Roraima) Statistics. Rio de Janeiro, Brazil: National Cancer Institute (Brazil).                                                                                                                                                                                                                                   | Mato Grosso         | 2000-2007 | Disease registry |
| Non-melanoma skin cancer (basal-cell carcinoma)    | Association to Fight Cancer in Goiás (Brazil), National Cancer Institute (Brazil). Brazil - Goiânia BasePopWeb Database - Population Based Cancer Registry (RCBP Goiânia) Statistics. Rio de Janeiro, Brazil: National Cancer Institute (Brazil).                                                                                        | Roraima             | 2003-2010 | Disease registry |
| Non-melanoma skin cancer (basal-cell carcinoma)    | Cancer Registry (RCBP Santos) Statistics. Rio de Janeiro, Brazil: National Cancer Institute (Brazil).                                                                                                                                                                                                                                    | Goiás               | 1990-2009 | Disease registry |
| Non-melanoma skin cancer (basal-cell carcinoma)    | Mato Grosso do Sul State Department of Health (Brazil), National Cancer Institute (Brazil). Brazil - Campo Grande BasePopWeb Database - Population Based Cancer Registry (RCBP Campo Grande) Statistics. Rio de Janeiro, Brazil: National Cancer Institute (Brazil).                                                                     | São Paulo           | 2008-2009 | Disease registry |
| Non-melanoma skin cancer (basal-cell carcinoma)    | National Cancer Institute (Brazil). Brazil - Poços de Caldas BasePopWeb Database - Population Based Cancer Registry (RCBP Poços de Caldas) Statistics. Rio de Janeiro, Brazil: National Cancer Institute (Brazil).                                                                                                                       | Mato Grosso Do Sul  | 2000-2009 | Disease registry |
| Non-melanoma skin cancer (basal-cell carcinoma)    | National Cancer Institute (Brazil), São Paulo Population Based Cancer Registry. Brazil - Sao Paulo BasePopWeb Database - Population Based Cancer Registry (RCBP-SP) Statistics. Rio de Janeiro, Brazil: National Cancer Institute (Brazil).                                                                                              | Minas Gerais        | 2007-2011 | Disease registry |
| Non-melanoma skin cancer (basal-cell carcinoma)    | National Cancer Institute (Brazil). Brazil - Espírito Santo BasePopWeb Database - Population Based Cancer Registry (RCBP do Estado do Espírito Santo) Statistics. Rio de Janeiro, Brazil: National Cancer Institute (Brazil).                                                                                                            | São Paulo           | 1997-2010 | Disease registry |
| Non-melanoma skin cancer (basal-cell carcinoma)    | National Cancer Institute (Brazil). Brazil - Natal BasePopWeb Database - Population Based Cancer Registry (RCBP Natal) Statistics. Rio de Janeiro, Brazil: National Cancer Institute (Brazil).                                                                                                                                           | Espírito Santo      | 1997-2012 | Disease registry |
| Non-melanoma skin cancer (basal-cell carcinoma)    | Aristides Maltez Hospital (Brazil), Bahia League Against Cancer (Brazil), National Cancer Institute (Brazil). Brazil - Salvador BasePopWeb Database - Population Based Cancer Registry (RCBP Salvador) Statistics. Rio de Janeiro, Brazil: National Cancer Institute (Brazil).                                                           | Rio Grande do Norte | 1999-2005 | Disease registry |
| Non-melanoma skin cancer (basal-cell carcinoma)    | Bariani RL, Nahas FX, Barbosa MVJ, Farah AB, Ferreira LM. Basal cell carcinoma: an updated epidemiological and therapeutically profile of an urban population. . 2006; 21(2): 66-73.                                                                                                                                                     | Bahia               | 1996-2005 | Disease registry |
| Non-melanoma skin cancer (basal-cell carcinoma)    | Amazonas State Foundation Oncology Control Center (FCECON), National Cancer Institute (Brazil). Brazil - Manaus BasePopWeb Database - Population Based Cancer Registry (RCBP Manaus) Statistics. Rio de Janeiro, Brazil: National Cancer Institute (Brazil).                                                                             |                     |           |                  |
| Non-melanoma skin cancer (basal-cell carcinoma)    | Cancer Registry (RCBP DRS Barretos) Statistics. Rio de Janeiro, Brazil: National Cancer Institute (Brazil).                                                                                                                                                                                                                              | Amazonas            | 1999-2006 | Disease registry |
| Non-melanoma skin cancer (basal-cell carcinoma)    | Health Department of the State of Paraíba (Brazil), National Cancer Institute (Brazil). Brazil - João Pessoa BasePopWeb Database - Population Based Cancer Registry (RCBP João Pessoa) Statistics. Rio de Janeiro, Brazil: National Cancer Institute (Brazil).                                                                           | São Paulo           | 2008-2013 | Disease registry |
| Non-melanoma skin cancer (basal-cell carcinoma)    | Minas Gerais Ministry of Health (Brazil), National Cancer Institute (Brazil). Brazil - Belo Horizonte BasePopWeb Database - Population Based Cancer Registry (RCBP Belo Horizonte) Statistics. Rio de Janeiro, Brazil: National Cancer Institute (Brazil).                                                                               | Paraíba             | 1999-2010 | Disease registry |
| Non-melanoma skin cancer (basal-cell carcinoma)    | National Cancer Institute (Brazil), Pará State Department of Public Health (SESAP) (Brazil). Brazil - Belém BasePopWeb Database - Population Based Cancer Registry (RCBP Belém) Statistics. Rio de Janeiro, Brazil: National Cancer Institute (Brazil).                                                                                  | Minas Gerais        | 2000-2008 | Disease registry |
| Non-melanoma skin cancer (basal-cell carcinoma)    | Amaral Carvalho Hospital (Brazil), National Cancer Institute (Brazil), Secretary of Municipal Health of Jau (Brazil). Brazil - Jahu BasePopWeb Database - Population Based Cancer Registry (RCBP Jahu) Statistics. Rio de Janeiro, Brazil: National Cancer Institute (Brazil).                                                           | Pará                | 1996-2009 | Disease registry |
| Non-melanoma skin cancer (basal-cell carcinoma)    | São Paulo Population Based Cancer Registry. Brazil - Sao Paulo Population Based Cancer Registry Statistics. São Paulo, Brazil: São Paulo Population Based Cancer Registry.                                                                                                                                                               | São Paulo           | 1996-2012 | Disease registry |
| Non-melanoma skin cancer (basal-cell carcinoma)    | National Cancer Institute (Brazil), Oncology Center, Sergipe Emergency Hospital (Brazil). Brazil - Aracaju BasePopWeb Database - Population Based Cancer Registry (RCBP Aracaju) Statistics. Rio de Janeiro, Brazil: National Cancer Institute (Brazil).                                                                                 | São Paulo           | 2011      | Disease registry |
| Non-melanoma skin cancer (basal-cell carcinoma)    | Cancer incidence in Five Continents Volumes I-VIII 1950-1997                                                                                                                                                                                                                                                                             | Sergipe             | 1996-2012 | Disease registry |
| Non-melanoma skin cancer (basal-cell carcinoma)    | Institute for Health Metrics and Evaluation (IHME). IHME GBD 2013 DisMod model input.                                                                                                                                                                                                                                                    | Global              | 1973-1998 | Disease registry |
| Non-melanoma skin cancer (basal-cell carcinoma)    |                                                                                                                                                                                                                                                                                                                                          | Global              | 1990-2013 | Modeled data     |

|                                                 |                                                                                                                                                                                                                                                                 |           |           |                       |
|-------------------------------------------------|-----------------------------------------------------------------------------------------------------------------------------------------------------------------------------------------------------------------------------------------------------------------|-----------|-----------|-----------------------|
| Non-melanoma skin cancer (basal-cell carcinoma) | Ministry of Health of Tocantins (Brazil), National Cancer Institute (Brazil). Brazil - Palmas BasePopWeb Database - Population Based Cancer Registry (RCBP Palmas) Statistics. Rio de Janeiro, Brazil: National Cancer Institute (Brazil).                      | Tocantins | 2000-2012 | Disease registry      |
| Non-melanoma skin cancer (basal-cell carcinoma) | Institute for Health Metrics and Evaluation (IHME). IHME GBD 2015 DisMod Cancer Procedure Incidence Estimates.                                                                                                                                                  | Ceará     | 1990-2006 | Disease registry      |
| Breast cancer                                   | Institute for Health Metrics and Evaluation (IHME). IHME GBD 2015 DisMod Cancer Procedure Incidence Estimates.                                                                                                                                                  | Global    | 1990-2020 | Modeled data          |
| Prostate cancer                                 | Institute for Health Metrics and Evaluation (IHME). IHME GBD 2015 DisMod Cancer Procedure Incidence Estimates.                                                                                                                                                  | Global    | 1990-2020 | Modeled data          |
| Bladder cancer                                  | Institute for Health Metrics and Evaluation (IHME). IHME GBD 2015 DisMod Cancer Procedure Incidence Estimates.                                                                                                                                                  | Global    | 1990-2020 | Modeled data          |
| Rheumatic heart disease                         | Brazil World Health Survey 2003                                                                                                                                                                                                                                 | Country   | 2002-2003 | Survey                |
| Rheumatic heart disease                         | Alves Meira ZM, de Castilho SR, Lins Barros MV, Maria Vitarelli A, Diniz Capanema F, Moreira NS, Moreira Camargos PA, Coelho MoTa CC. Prevalence of rheumatic fever in children from a public high school in Belo Horizonte. . 1995; 65(4): 331-4.              |           | 1992      | Scientific literature |
| Rheumatic heart disease                         | Miranda LP, Camargos PA, Torres RM, Meira ZM. Prevalence of rheumatic heart disease in a public school of Belo Horizonte. . 2014; 103(2.0): 89-97.                                                                                                              |           | 2010-2011 | Scientific literature |
| Rheumatic heart disease                         | Institute for Health Metrics and Evaluation (IHME). IHME GBD 2015 DisMod Low-income Endemic Rheumatic Heart Disease Cause-specific Mortality Rates.                                                                                                             | Global    | 1990-2016 | Modeled data          |
| Rheumatic heart disease                         | Institute for Health Metrics and Evaluation (IHME). IHME GBD 2015 DisMod High-income Non-endemic Rheumatic Heart Disease Cause-specific Mortality Rates.                                                                                                        | Global    | 1990-2016 | Modeled data          |
| Rheumatic heart disease                         | Brazilian Institute of Geography and Statistics (IBGE), Ministry of Health (Brazil), Ministry of Planning, Budget, and Management (Brazil). Brazil National Health Survey 2013. Rio de Janeiro, Brazil: Brazilian Institute of Geography and Statistics (IBGE). | Country   | 2013-2014 | Survey                |
| Rheumatic heart disease                         | Health Institute (São Paulo, Brazil), State University of Campinas, São Paulo Municipal Health Department, São Paulo State University, University of São Paulo. Brazil - São Paulo Health Survey 2008-2009.                                                     | São Paulo | 2002-2008 | Survey                |
| Ischemic heart disease                          | Institute for Health Metrics and Evaluation (IHME). IHME GBD DisMod Ischemic Heart Disease Excess Mortality Estimates.                                                                                                                                          | Global    | 1990-2016 | Modeled data          |
| Ischemic heart disease                          | Health Institute (São Paulo, Brazil), State University of Campinas, São Paulo Municipal Health Department, São Paulo State University, University of São Paulo. Brazil - São Paulo Health Survey 2008-2009.                                                     | São Paulo | 2002-2008 | Survey                |
| Ischemic heart disease                          | Brazilian Institute of Geography and Statistics (IBGE), Ministry of Health (Brazil), Ministry of Planning, Budget, and Management (Brazil). Brazil National Health Survey 2013. Rio de Janeiro, Brazil: Brazilian Institute of Geography and Statistics (IBGE). | Country   | 2013-2014 | Survey                |
| Ischemic heart disease                          | Institute for Health Metrics and Evaluation (IHME). IHME GBD 2015 DisMod Ischemic Heart Diseases Excess Mortality Estimates.                                                                                                                                    | Global    | 1990-2016 | Modeled data          |
| Ischemic heart disease                          | Institute for Health Metrics and Evaluation (IHME). Cause of Death Ensemble Modeling Results myocardial infarction in Salvador, Brazil: I. Incidence, lethality, and mortality. . 1987; 21(1): 28-37.                                                           | Global    | 1980-2015 | Modeled data          |
| Ischemic heart disease                          |                                                                                                                                                                                                                                                                 |           | 1982      | Scientific literature |
| Ischemic heart disease                          | Piva e Mattos LAL, Berwanger O, Santos ES dos, Reis HJL, Romano ER, Petriz JLF, Sousa ACS, Neuenschwander FC, Guimarães JI, Andrade JP de. Clinical outcomes at 30 days in the Brazilian Registry of Acute Coronary Syndromes (ACCEPT). . 2013; 100(1): 683.    |           | 2010-2011 | Scientific literature |
| Ischemic heart disease                          | Brazil World Health Survey 2003                                                                                                                                                                                                                                 | Country   | 2002-2003 | Survey                |
| Cerebrovascular disease                         | Fernandes TG, Goulart AC, Santos-Junior WR, Alencar AP, Benseñor IM, Lotufo PA. Educational levels and the functional dependence of ischemic stroke survivors. . 2012; 28(8): 1581-90.                                                                          |           | 2006-2009 | Scientific literature |
| Ischemic stroke                                 | Health Institute (São Paulo, Brazil), State University of Campinas, São Paulo Municipal Health Department, São Paulo State University, University of São Paulo. Brazil - São Paulo Health Survey 2008-2009.                                                     | São Paulo | 2002-2008 | Survey                |
| Ischemic stroke                                 | Institute for Health Metrics and Evaluation (IHME). IHME GBD 2015 DisMod Cerebrovascular Disease Excess Mortality Estimates.                                                                                                                                    | Global    | 1990-2016 | Modeled data          |
| Ischemic stroke                                 | Fernandes TG, Goulart AC, Santos-Junior WR, Alencar AP, Benseñor IM, Lotufo PA. Educational levels and the functional dependence of ischemic stroke survivors. . 2012; 28(8): 1581-90.                                                                          |           | 2006-2009 | Scientific literature |
| Ischemic stroke                                 | Cerebrovascular Disease, Hemorrhagic Stroke and Ischemic Stroke Cause-specific Mortality Rate Estimates.                                                                                                                                                        | Global    | 1990-2016 | Modeled data          |
| Ischemic stroke                                 | Cabral NL, Gonçalves ARR, Longo AL, Moro CHC, Costa G, Amaral CH, Fonseca L a M, Eluf-Neto J. Incidence of stroke subtypes, prognosis and prevalence of risk factors in Joinville, Brazil: a 2 year community based study. . 2009; 80(7): 755-61.               |           | 2005-2006 | Scientific literature |
| Ischemic stroke                                 | Minelli C, Fu Fen L, Camara Minelli DP. Stroke Incidence, Prognosis, 30-Day, and 1-Year Case Fatality Rates in Matão, Brazil. . 2007; 38(11): 2906-11.                                                                                                          |           | 2003-2004 | Scientific literature |
| Ischemic stroke                                 | Brazilian Institute of Geography and Statistics (IBGE), Ministry of Health (Brazil), Ministry of Planning, Budget, and Management (Brazil). Brazil National Health Survey 2013. Rio de Janeiro, Brazil: Brazilian Institute of Geography and Statistics (IBGE). | Country   | 2013-2014 | Survey                |
| Ischemic stroke                                 | Brazil - São Paulo Survey on Health, Well-Being, and Aging in Latin America and the Caribbean 1999-2000                                                                                                                                                         | São Paulo | 1999-2000 | Survey                |
| Ischemic stroke                                 | Brazil World Health Survey 2003                                                                                                                                                                                                                                 | Country   | 2002-2003 | Survey                |
| Hemorrhagic stroke                              | Health Institute (São Paulo, Brazil), State University of Campinas, São Paulo Municipal Health Department, São Paulo State University, University of São Paulo. Brazil - São Paulo Health Survey 2008-2009.                                                     | São Paulo | 2002-2008 | Survey                |
| Hemorrhagic stroke                              | Brazil World Health Survey 2003                                                                                                                                                                                                                                 | Country   | 2002-2003 | Survey                |
| Hemorrhagic stroke                              | Institute for Health Metrics and Evaluation (IHME). IHME GBD 2015 DisMod Cerebrovascular Disease Excess Mortality Estimates.                                                                                                                                    | Global    | 1990-2016 | Modeled data          |
| Hemorrhagic stroke                              | Minelli C, Fu Fen L, Camara Minelli DP. Stroke Incidence, Prognosis, 30-Day, and 1-Year Case Fatality Rates in Matão, Brazil. . 2007; 38(11): 2906-11.                                                                                                          |           | 2003-2004 | Scientific literature |
| Hemorrhagic stroke                              | Cabral NL, Gonçalves ARR, Longo AL, Moro CHC, Costa G, Amaral CH, Fonseca L a M, Eluf-Neto J. Incidence of stroke subtypes, prognosis and prevalence of risk factors in Joinville, Brazil: a 2 year community based study. . 2009; 80(7): 755-61.               |           | 2005-2006 | Scientific literature |
| Hemorrhagic stroke                              | Brazilian Institute of Geography and Statistics (IBGE), Ministry of Health (Brazil), Ministry of Planning, Budget, and Management (Brazil). Brazil National Health Survey 2013. Rio de Janeiro, Brazil: Brazilian Institute of Geography and Statistics (IBGE). | Country   | 2013-2014 | Survey                |
| Hemorrhagic stroke                              | Fernandes TG, Goulart AC, Santos-Junior WR, Alencar AP, Benseñor IM, Lotufo PA. Educational levels and the functional dependence of ischemic stroke survivors. . 2012; 28(8): 1581-90.                                                                          |           | 2006-2009 | Scientific literature |
| Hemorrhagic stroke                              | Cerebrovascular Disease, Hemorrhagic Stroke and Ischemic Stroke Cause-specific Mortality Rate Estimates.                                                                                                                                                        | Global    | 1990-2016 | Modeled data          |
| Hemorrhagic stroke                              | Brazil - São Paulo Survey on Health, Well-Being, and Aging in Latin America and the Caribbean 1999-2000                                                                                                                                                         | São Paulo | 1999-2000 | Survey                |
| Myocarditis                                     | Health Institute (São Paulo, Brazil), State University of Campinas, São Paulo Municipal Health Department, São Paulo State University, University of São Paulo. Brazil - São Paulo Health Survey 2008-2009.                                                     | São Paulo | 2002-2008 | Survey                |
| Myocarditis                                     | Brazil World Health Survey 2003                                                                                                                                                                                                                                 | Country   | 2002-2003 | Survey                |
| Myocarditis                                     | Brazilian Institute of Geography and Statistics (IBGE), Ministry of Health (Brazil), Ministry of Planning, Budget, and Management (Brazil). Brazil National Health Survey 2013. Rio de Janeiro, Brazil: Brazilian Institute of Geography and Statistics (IBGE). | Country   | 2013-2014 | Survey                |
| Atrial fibrillation and flutter                 | Health Institute (São Paulo, Brazil), State University of Campinas, São Paulo Municipal Health Department, São Paulo State University, University of São Paulo. Brazil - São Paulo Health Survey 2008-2009.                                                     | São Paulo | 2002-2008 | Survey                |
| Atrial fibrillation and flutter                 | Fornari LS, Calderaro D, Nassar IB, Lauretti C, Nakamura L, Bagnatori R, Agno W, Caramelli B. Misuse of antithrombotic therapy in atrial fibrillation patients: frequent, pervasive and persistent. . 2006; 23(1): 65-71.                                       |           | 2002      | Scientific literature |
| Atrial fibrillation and flutter                 | Brazil World Health Survey 2003                                                                                                                                                                                                                                 | Country   | 2002-2003 | Survey                |
| Atrial fibrillation and flutter                 | Marcolino MS, Palhares DMF, Benjamin EJ, Ribeiro AL. Atrial fibrillation: prevalence in a large database of primary care patients in Brazil. . 2015; 17(12): 1787-90.                                                                                           |           | 2011      | Scientific literature |
| Atrial fibrillation and flutter                 | Institute for Health Metrics and Evaluation (IHME). IHME GBD Atrial Fibrillation and Flutter Excess Mortality Estimates.                                                                                                                                        | Global    | 1990-2016 | Modeled data          |
| Atrial fibrillation and flutter                 | Brazilian Institute of Geography and Statistics (IBGE), Ministry of Health (Brazil), Ministry of Planning, Budget, and Management (Brazil). Brazil National Health Survey 2013. Rio de Janeiro, Brazil: Brazilian Institute of Geography and Statistics (IBGE). | Country   | 2013-2014 | Survey                |
| Endocarditis                                    | Brazilian Institute of Geography and Statistics (IBGE), Ministry of Health (Brazil), Ministry of Planning, Budget, and Management (Brazil). Brazil National Health Survey 2013. Rio de Janeiro, Brazil: Brazilian Institute of Geography and Statistics (IBGE). | Country   | 2013-2014 | Survey                |
| Endocarditis                                    | Ministry of Health (Brazil). Brazil Hospital Information System 2013-2014.                                                                                                                                                                                      |           | 2013-2017 | Administrative record |
| Endocarditis                                    | Ministry of Health (Brazil). Brazil Hospital Information System 1998-2002.                                                                                                                                                                                      |           | 1998-2002 | Administrative record |
| Endocarditis                                    | Institute for Health Metrics and Evaluation (IHME). IHME Cause of Death Ensemble Modeling (CODEM) Results 2010.                                                                                                                                                 | Global    | 1990-2010 | Modeled data          |
| Endocarditis                                    | Ministry of Health (Brazil). Brazil Hospital Information System 2003-2007.                                                                                                                                                                                      |           | 2003-2007 | Administrative record |
| Endocarditis                                    | Ministry of Health (Brazil). Brazil Hospital Information System 1997. Rio de Janeiro, Brazil: Ministry of Health (Brazil).                                                                                                                                      | Country   | 1993-1997 | Administrative record |

|                                       |                                                                                                                                                                                                                                                                                                                                 |           |           |                       |
|---------------------------------------|---------------------------------------------------------------------------------------------------------------------------------------------------------------------------------------------------------------------------------------------------------------------------------------------------------------------------------|-----------|-----------|-----------------------|
| Endocarditis                          | Brazil World Health Survey 2003                                                                                                                                                                                                                                                                                                 | Country   | 2002-2003 | Survey                |
| Endocarditis                          | Ministry of Health (Brazil). Brazil Hospital Information System 2008-2012.                                                                                                                                                                                                                                                      |           | 2008-2012 | Administrative record |
| Endocarditis                          | Health Institute (São Paulo, Brazil), State University of Campinas, São Paulo Municipal Health Department, São Paulo State University, University of São Paulo. Brazil - São Paulo Health Survey 2008-2009.                                                                                                                     | São Paulo | 2002-2008 | Survey                |
| Chronic obstructive pulmonary disease | Menezes A, Macedo SC, Gigante DP, da Costa JD, Olinto MT, Fiss E, Chatkin M, Hallal PC, Victora CG. Prevalence and Risk Factors for Chronic Obstructive Pulmonary Disease According to Symptoms and Spirometry. . 2004; 1(2): 173-9.                                                                                            |           | 2001      | Scientific literature |
| Chronic obstructive pulmonary disease | M, Talamo C, Hallal PC, Victora CG, PLATINO Team. Chronic obstructive pulmonary disease in five Latin American cities (the PLATINO study): a prevalence study. . 2005; 366(9500): 1875-81.                                                                                                                                      | Country   | 2002-2004 | Scientific literature |
| Silicosis                             | Brazil World Health Survey 2003                                                                                                                                                                                                                                                                                                 | Country   | 2002-2003 | Survey                |
| Silicosis                             | Ministry of Health (Brazil). Brazil Hospital Information System 1998-2002.                                                                                                                                                                                                                                                      |           | 1998-2002 | Administrative record |
| Silicosis                             | Brazilian Institute of Geography and Statistics (IBGE), Ministry of Health (Brazil), Ministry of Planning, Budget, and Management (Brazil). Brazil National Health Survey 2013. Rio de Janeiro, Brazil: Brazilian Institute of Geography and Statistics (IBGE).                                                                 |           |           |                       |
| Silicosis                             | Ministry of Health (Brazil). Brazil Hospital Information System 2003-2007.                                                                                                                                                                                                                                                      | Country   | 2013-2014 | Survey                |
| Silicosis                             | Health Institute (São Paulo, Brazil), State University of Campinas, São Paulo Municipal Health Department, São Paulo State University, University of São Paulo. Brazil - São Paulo Health Survey 2008-2009.                                                                                                                     |           | 2003-2007 | Administrative record |
| Silicosis                             | Ministry of Health (Brazil). Brazil Hospital Information System 2013-2014.                                                                                                                                                                                                                                                      | São Paulo | 2002-2008 | Survey                |
| Silicosis                             | Ministry of Health (Brazil). Brazil Hospital Information System 1997. Rio de Janeiro, Brazil: Ministry of Health (Brazil).                                                                                                                                                                                                      |           | 2013-2017 | Administrative record |
| Silicosis                             | Ministry of Health (Brazil). Brazil Hospital Information System 2008-2012.                                                                                                                                                                                                                                                      | Country   | 1993-1997 | Administrative record |
| Silicosis                             | Ministry of Health (Brazil). Brazil Hospital Information System 2008-2012.                                                                                                                                                                                                                                                      |           | 2008-2012 | Administrative record |
| Asbestosis                            | Brazil World Health Survey 2003                                                                                                                                                                                                                                                                                                 | Country   | 2002-2003 | Survey                |
| Asbestosis                            | Ministry of Health (Brazil). Brazil Hospital Information System 1997. Rio de Janeiro, Brazil: Ministry of Health (Brazil).                                                                                                                                                                                                      | Country   | 1993-1997 | Administrative record |
| Asbestosis                            | Ministry of Health (Brazil). Brazil Hospital Information System 2013-2014.                                                                                                                                                                                                                                                      |           | 2013-2017 | Administrative record |
| Asbestosis                            | Health Institute (São Paulo, Brazil), State University of Campinas, São Paulo Municipal Health Department, São Paulo State University, University of São Paulo. Brazil - São Paulo Health Survey 2008-2009.                                                                                                                     | São Paulo | 2002-2008 | Survey                |
| Asbestosis                            | Ministry of Health (Brazil). Brazil Hospital Information System 2008-2012.                                                                                                                                                                                                                                                      |           | 2008-2012 | Administrative record |
| Asbestosis                            | Ministry of Health (Brazil). Brazil Hospital Information System 1998-2002.                                                                                                                                                                                                                                                      |           | 1998-2002 | Administrative record |
| Asbestosis                            | Brazilian Institute of Geography and Statistics (IBGE), Ministry of Health (Brazil), Ministry of Planning, Budget, and Management (Brazil). Brazil National Health Survey 2013. Rio de Janeiro, Brazil: Brazilian Institute of Geography and Statistics (IBGE).                                                                 | Country   | 2013-2014 | Survey                |
| Asbestosis                            | Ministry of Health (Brazil). Brazil Hospital Information System 2003-2007.                                                                                                                                                                                                                                                      |           | 2003-2007 | Administrative record |
| Coal workers pneumoconiosis           | Health Institute (São Paulo, Brazil), State University of Campinas, São Paulo Municipal Health Department, São Paulo State University, University of São Paulo. Brazil - São Paulo Health Survey 2008-2009.                                                                                                                     | São Paulo | 2002-2008 | Survey                |
| Coal workers pneumoconiosis           | Ministry of Health (Brazil). Brazil Hospital Information System 2003-2007.                                                                                                                                                                                                                                                      |           | 2003-2007 | Administrative record |
| Coal workers pneumoconiosis           | Brazil World Health Survey 2003                                                                                                                                                                                                                                                                                                 | Country   | 2002-2003 | Survey                |
| Coal workers pneumoconiosis           | Ministry of Health (Brazil). Brazil Hospital Information System 1997. Rio de Janeiro, Brazil: Ministry of Health (Brazil).                                                                                                                                                                                                      | Country   | 1993-1997 | Administrative record |
| Coal workers pneumoconiosis           | Ministry of Health (Brazil). Brazil Hospital Information System 2013-2014.                                                                                                                                                                                                                                                      |           | 2013-2017 | Administrative record |
| Coal workers pneumoconiosis           | Ministry of Health (Brazil). Brazil Hospital Information System 1998-2002.                                                                                                                                                                                                                                                      |           | 1998-2002 | Administrative record |
| Coal workers pneumoconiosis           | Brazilian Institute of Geography and Statistics (IBGE), Ministry of Health (Brazil), Ministry of Planning, Budget, and Management (Brazil). Brazil National Health Survey 2013. Rio de Janeiro, Brazil: Brazilian Institute of Geography and Statistics (IBGE).                                                                 | Country   | 2013-2014 | Survey                |
| Coal workers pneumoconiosis           | Ministry of Health (Brazil). Brazil Hospital Information System 2008-2012.                                                                                                                                                                                                                                                      |           | 2008-2012 | Administrative record |
| Coal workers pneumoconiosis           | Brazilian Institute of Geography and Statistics (IBGE), Ministry of Health (Brazil), Ministry of Planning, Budget, and Management (Brazil). Brazil National Health Survey 2013. Rio de Janeiro, Brazil: Brazilian Institute of Geography and Statistics (IBGE).                                                                 | Country   | 2013-2014 | Survey                |
| Other pneumoconiosis                  | Ministry of Health (Brazil). Brazil Hospital Information System 2008-2012.                                                                                                                                                                                                                                                      |           | 2008-2012 | Administrative record |
| Other pneumoconiosis                  | Brazil World Health Survey 2003                                                                                                                                                                                                                                                                                                 | Country   | 2002-2003 | Survey                |
| Other pneumoconiosis                  | Ministry of Health (Brazil). Brazil Hospital Information System 1997. Rio de Janeiro, Brazil: Ministry of Health (Brazil).                                                                                                                                                                                                      | Country   | 1993-1997 | Administrative record |
| Other pneumoconiosis                  | Ministry of Health (Brazil). Brazil Hospital Information System 2013-2014.                                                                                                                                                                                                                                                      |           | 2013-2017 | Administrative record |
| Other pneumoconiosis                  | Ministry of Health (Brazil). Brazil Hospital Information System 2003-2007.                                                                                                                                                                                                                                                      |           | 2003-2007 | Administrative record |
| Other pneumoconiosis                  | Health Institute (São Paulo, Brazil), State University of Campinas, São Paulo Municipal Health Department, São Paulo State University, University of São Paulo. Brazil - São Paulo Health Survey 2008-2009.                                                                                                                     | São Paulo | 2002-2008 | Survey                |
| Other pneumoconiosis                  | Ministry of Health (Brazil). Brazil Hospital Information System 1998-2002.                                                                                                                                                                                                                                                      |           | 1998-2002 | Administrative record |
| Asthma                                | Ministry of Health (Brazil). Secretariat of Health Surveillance, Ministry of Health (Brazil). Brazil Surveillance System of Risk Factors for Chronic Diseases by Telephone Interviews 2010.                                                                                                                                     | Country   | 2010      | Survey                |
| Asthma                                | Silva AA, Barbieri MA, Cardoso VC, Batista RF, Simões VM, Vianna EO, Gutierrez MR, Figueiredo ML, Silva NA, Pereira TS, Rodriguez JD, Loureiro SR, Ribeiro VS, Bettiol H. Prevalence of non-communicable diseases in Brazilian children: follow-up at school age of two Brazilian birth cohorts of the 1990's. . 2011; 11: 486. |           | 2004-2006 | Scientific literature |
| Asthma                                | associated risk factors among infants in Recife, Pernambuco State, Brazil. . 2011; 27(8): 1551-9.                                                                                                                                                                                                                               |           | 2007      | Scientific literature |
| Asthma                                | morbidity in 13-14-year-old schoolchildren in the city of Fortaleza, Ceará State, Brazil. . 2011; 27(1): 103-12.                                                                                                                                                                                                                |           | 2006-2007 | Scientific literature |
| Asthma                                | Lima WL, Lima EYNCL, Costa M do R da SR, Santos AM dos, Silva AAM da, Costa ES. Asthma and associated factors in students 13 and 14 years of age in São Luís, Maranhão State, Brazil. . 2012; 28(6): 1046-56.                                                                                                                   |           | 2008-2009 | Scientific literature |
| Asthma                                | Jucá SCBMP, Takano OA, Moraes LSL, Guimarães LV. Asthma prevalence and risk factors in adolescents 13 to 14 years of age in Cuiabá, Mato Grosso State, Brazil. . 2012; 28(4): 689-97.                                                                                                                                           |           | 2008      | Scientific literature |
| Asthma                                | Chong Neto HJ, Rosário NA, Grasselli EA, Silva FC a, Bojarski L de FM, Rosário CS, Rosário BA, Chong FH. Recurrent wheezing in infants: epidemiological changes. . 2011; 87(6): 547-50.                                                                                                                                         |           | 2005-2010 | Scientific literature |
| Asthma                                | Toledo MF, Rozov T, Leone C. Prevalence of asthma and allergies in 13- to 14-year-old adolescents and the frequency of risk factors in carriers of current asthma in Taubaté, São Paulo, Brazil. . 2011; 39(5): 284-90.                                                                                                         |           | 2008-2010 | Scientific literature |
| Asthma                                | Souza da Cunha S, Barreto ML, Fiaccone RL, Cooper PJ, Alcantara-Neves NM, Simões S de M, Cruz AA, Rodrigues LC. Asthma cases in childhood attributed to atopy in tropical area in Brazil. . 2010; 28(6): 405-11.                                                                                                                |           | 2005-2006 | Scientific literature |
| Asthma                                | Silva R de CR, Assis AMO, Gonçalves MS, Fiaccone RL, Matos SMA, Barreto ML, Pinto E de J, Silva LA da, Rodrigues LC, Alcantara-Neves NM. The prevalence of wheezing and its association with body mass index and abdominal obesity in children. . 2013; 50(3): 267-73.                                                          |           | 2010      | Scientific literature |
| Asthma                                | Wehrmeister FC, Peres KG de A. Regional inequalities in the prevalence of asthma diagnosis in children: an analysis of the Brazilian National Household Sample Survey, 2003. . 2010; 26(9): 1839-52.                                                                                                                            |           | 2003      | Scientific literature |
| Asthma                                | Roelofs R, Gurgel RQ, Wendte J, Polderman J, Barreto-Filho JAS, Solé D, Motta-Franco J, De Munter J, Agyemang C. Relationship between asthma and high blood pressure among adolescents in Aracaju, Brazil. . 2010; 47(6): 639-43.                                                                                               |           | 2008      | Scientific literature |
| Asthma                                | Sousa CA, Cesar CL, Barros MB, Carandina L, Goldbaum M, Pereira JC. [Prevalence of asthma and risk factors associated: population based study in Sao Paulo, Southeastern Brazil, 2008-2009]. . 2012; 46(5): 825-33.                                                                                                             |           | 2008-2009 | Scientific literature |
| Asthma                                | Mallol J, Solé D, Baeza-Bacab M, Aguirre-Camposano V, Soto-Quiros M, Baena-Cagnani C, Latin American ISAAC Group. Regional variation in asthma symptom prevalence in Latin American children. . 2010; 47(6): 644-50.                                                                                                            |           | 2001-2003 | Scientific literature |
| Asthma                                | rhinitis among adolescents in the city of Fortaleza, Brazil: temporal changes. . 2013; 39(2): 128-37.                                                                                                                                                                                                                           |           | 2006-2010 | Scientific literature |
| Asthma                                | Schuh C, Fritscher LG, Chapman KR, Fritscher CC. The prevalence of asthma and atopy in schoolchildren from Porto Alegre, Brazil, has plateaued. . 2015; 109(3): 308-11.                                                                                                                                                         |           | 2013      | Scientific literature |
| Asthma                                | Wilmer FA, Maurici R, Nazario CA, Nazario KC, Passaro PF, Piazza HE, Bertoldi RA, Pizzichini E, Pizzichini MM. Temporal trends in the prevalence of asthma and rhinoconjunctivitis in adolescents. . 2015; 49: nan.                                                                                                             |           | 2001-2012 | Scientific literature |
| Asthma                                | Brazilian Institute of Geography and Statistics (IBGE), Ministry of Education (Brazil), Ministry of Health (Brazil), Ministry of Planning, Budget, and Management (Brazil), Secretariat of Health Surveillance, Ministry of Health (Brazil). Brazil National Survey of School Health 2012.                                      | Country   | 2012      | Survey                |
| Asthma                                | Worldwide variations in the prevalence of asthma symptoms: the International Study of Asthma and Allergies in Childhood (ISAAC)                                                                                                                                                                                                 | Country   | 1993-1995 | Scientific literature |
| Asthma                                | Brazil World Health Survey 2003                                                                                                                                                                                                                                                                                                 | Country   | 2003      | Survey                |

|                                                                |                                                                                                                                                                                                                                                                                                                 |           |           |                       |
|----------------------------------------------------------------|-----------------------------------------------------------------------------------------------------------------------------------------------------------------------------------------------------------------------------------------------------------------------------------------------------------------|-----------|-----------|-----------------------|
| Asthma                                                         | Alcantara-Neves NM, Cruz AA, Simões S de M, Barreto ML, SCAALA (Social Change, Asthma and Allergy in Latin America) Study Group. Overweight, asthma symptoms, atopy and pulmonary function in children of 4-12 years of age: findings from the SCAALA cohort in Salvador, Bahia, Brazil. . 2011; 14(7): 1270-8. |           | 2005      | Scientific literature |
| Asthma                                                         | Lai CK, Beasley R, Crane J, Foliaki S, Shah J, Weiland S. Global variation in the prevalence and severity of asthma symptoms: phase three of the International Study of Asthma and Allergies in Childhood (ISAAC). . 2009; 64(6): 476-483.                                                                      |           | 2001-2003 | Scientific literature |
| Asthma                                                         | De Farias MR de C, Rosa AM, Hacon S de S, de Castro HA, Ignotti E. Prevalence of asthma in schoolchildren in Alta Floresta - a municipality in the southeast of the Brazilian Amazon. . 2010; 13(1): 49-57.                                                                                                     |           | 2007      | Scientific literature |
| Asthma                                                         | Fiori NS, Gonçalves H, Dumith SC, Cesar MADC, Menezes AMB, Macedo SEC. Ten-year trends in prevalence of asthma in adults in southern Brazil: comparison of two population-based studies. . 2012; 28(1): 135-44.                                                                                                 |           | 2010      | Scientific literature |
| Asthma                                                         | Freitas MS, Monteiro JCS, Camelo-Nunes IC, Solé D. Prevalence of asthma symptoms and associated factors in schoolchildren from Brazilian Amazon islands. . 2012; 49(6): 600-5.                                                                                                                                  |           | 2007-2009 | Scientific literature |
| Asthma                                                         | Garcia-Marcos L, Mallol J, Solé D, Brand PLP, EISL Study Group. International study of wheezing in infants: risk factors in affluent and non-affluent countries during the first year of life. . 2010; 21(15): 878-88.                                                                                          |           | 2005-2007 | Scientific literature |
| Asthma                                                         | Lukrafka JL, Fuchs SC, Moreira LB, Picon RV, Fischer GB, Fuchs FD. Performance of the ISAAC questionnaire to establish the prevalence of asthma in adolescents: a population-based study. . 2010; 47(2): 166-9.                                                                                                 |           | 2005-2007 | Scientific literature |
| Asthma                                                         | Brazilian Institute of Geography and Statistics (IBGE), Ministry of Health (Brazil), Ministry of Planning, Budget, and Management (Brazil). Brazil National Health Survey 2013. Rio de Janeiro, Brazil: Brazilian Institute of Geography and Statistics (IBGE).                                                 | Country   | 2013      | Survey                |
| Asthma                                                         | Castro LK de, Cerci Neto A, Ferreira Filho OF. Prevalence of symptoms of asthma, rhinitis and atopic eczema among students between 6 and 7 years of age in the city of Londrina, Brazil. . 2010; 36(3): 286-92.                                                                                                 |           | 2008      | Scientific literature |
| Asthma                                                         | Feltosa CA, Santos DN, Barreto do Carmo MB, Santos LM, Teles CAS, Rodrigues LC, Barreto ML. Behavior problems and prevalence of asthma symptoms among Brazilian children. . 2011; 71(3): 160-5.                                                                                                                 |           | 2006      | Scientific literature |
| Interstitial lung disease and pulmonary sarcoidosis            | Ministry of Health (Brazil). Brazil Hospital Information System 1997. Rio de Janeiro, Brazil: Ministry of Health (Brazil).                                                                                                                                                                                      | Country   | 1993-1997 | Administrative record |
| Interstitial lung disease and pulmonary sarcoidosis            | Ministry of Health (Brazil). Brazil Hospital Information System 2008-2012.                                                                                                                                                                                                                                      |           | 2008-2012 | Administrative record |
| Interstitial lung disease and pulmonary sarcoidosis            | Ministry of Health (Brazil). Brazil Hospital Information System 1998-2002.                                                                                                                                                                                                                                      |           | 1998-2002 | Administrative record |
| Interstitial lung disease and pulmonary sarcoidosis            | Brazilian Institute of Geography and Statistics (IBGE), Ministry of Health (Brazil), Ministry of Planning, Budget, and Management (Brazil). Brazil National Health Survey 2013. Rio de Janeiro, Brazil: Brazilian Institute of Geography and Statistics (IBGE).                                                 | Country   | 2013-2014 | Survey                |
| Interstitial lung disease and pulmonary sarcoidosis            | Brazil World Health Survey 2003                                                                                                                                                                                                                                                                                 | Country   | 2002-2003 | Survey                |
| Interstitial lung disease and pulmonary sarcoidosis            | Ministry of Health (Brazil). Brazil Hospital Information System 2013-2014.                                                                                                                                                                                                                                      |           | 2013-2017 | Administrative record |
| Interstitial lung disease and pulmonary sarcoidosis            | Health Institute (São Paulo, Brazil), State University of Campinas, São Paulo Municipal Health Department, São Paulo State University, University of São Paulo. Brazil - São Paulo Health Survey 2008-2009.                                                                                                     | São Paulo | 2002-2008 | Survey                |
| Interstitial lung disease and pulmonary sarcoidosis            | Ministry of Health (Brazil). Brazil Hospital Information System 2003-2007.                                                                                                                                                                                                                                      |           | 2003-2007 | Administrative record |
| Cirrhosis and other chronic liver diseases                     | Ministry of Health (Brazil). Brazil Hospital Information System 1997. Rio de Janeiro, Brazil: Ministry of Health (Brazil).                                                                                                                                                                                      | Country   | 1993-1997 | Administrative record |
| Cirrhosis and other chronic liver diseases                     | Health Institute (São Paulo, Brazil), State University of Campinas, São Paulo Municipal Health Department, São Paulo State University, University of São Paulo. Brazil - São Paulo Health Survey 2008-2009.                                                                                                     | São Paulo | 2002-2008 | Survey                |
| Cirrhosis and other chronic liver diseases                     | Ministry of Health (Brazil). Brazil Hospital Information System 2008-2012.                                                                                                                                                                                                                                      |           | 2008-2012 | Administrative record |
| Cirrhosis and other chronic liver diseases                     | Ministry of Health (Brazil). Brazil Hospital Information System 1998-2002.                                                                                                                                                                                                                                      |           | 1998-2002 | Administrative record |
| Cirrhosis and other chronic liver diseases                     | Brazilian Institute of Geography and Statistics (IBGE), Ministry of Health (Brazil), Ministry of Planning, Budget, and Management (Brazil). Brazil National Health Survey 2013. Rio de Janeiro, Brazil: Brazilian Institute of Geography and Statistics (IBGE).                                                 | Country   | 2013-2014 | Survey                |
| Cirrhosis and other chronic liver diseases                     | Brazil World Health Survey 2003                                                                                                                                                                                                                                                                                 | Country   | 2002-2003 | Survey                |
| Cirrhosis and other chronic liver diseases                     | Ministry of Health (Brazil). Brazil Hospital Information System 2013-2014.                                                                                                                                                                                                                                      |           | 2013-2017 | Administrative record |
| Cirrhosis and other chronic liver diseases                     | Ministry of Health (Brazil). Brazil Hospital Information System 2003-2007.                                                                                                                                                                                                                                      |           | 2003-2007 | Administrative record |
| Cirrhosis and other chronic liver diseases due to              | Ministry of Health (Brazil). Brazil Hospital Information System 1998-2002.                                                                                                                                                                                                                                      |           | 1998-2002 | Administrative record |
| Cirrhosis and other chronic liver diseases due to              | Ministry of Health (Brazil). Brazil Hospital Information System 2008-2012.                                                                                                                                                                                                                                      |           | 2008-2012 | Administrative record |
| Cirrhosis and other chronic liver diseases due to              | Ministry of Health (Brazil). Brazil Hospital Information System 2013-2014.                                                                                                                                                                                                                                      |           | 2013-2017 | Administrative record |
| Cirrhosis and other chronic liver diseases due to hepatitis B  | Souza NP, Villar LM, Garbin AJ, Rovida TA, Garbin CA. Assessment of health-related quality of life and related factors in patients with chronic liver disease. . 2015; 19(6): 590-5.                                                                                                                            |           | 2011-2012 | Scientific literature |
| Cirrhosis and other chronic liver diseases due to              | Ministry of Health (Brazil). Brazil Hospital Information System 2003-2007.                                                                                                                                                                                                                                      |           | 2003-2007 | Administrative record |
| Cirrhosis and other chronic liver diseases due to hepatitis B  | Ministry of Health (Brazil). Brazil Hospital Information System 1997. Rio de Janeiro, Brazil: Ministry of Health (Brazil).                                                                                                                                                                                      | Country   | 1993-1997 | Administrative record |
| Cirrhosis and other chronic liver diseases due to hepatitis B  | Goncalves PL, Zago-Gomes, Mda P, Marques CC, Mendona AT, Goncalves CS, Pereira FE. Etiology of liver cirrhosis in Brazil: chronic alcoholism and hepatitis viruses in liver cirrhosis diagnosed in the state of Espirito Santo. . 2013; 68(3): 291-5.                                                           |           | 1993-2011 | Scientific literature |
| Cirrhosis and other chronic liver diseases due to hepatitis B  | Ministry of Health (Brazil). Brazil Hospital Information System 1998-2002.                                                                                                                                                                                                                                      |           | 1998-2002 | Administrative record |
| Cirrhosis and other chronic liver diseases due to hepatitis C  | Souza NP, Villar LM, Garbin AJ, Rovida TA, Garbin CA. Assessment of health-related quality of life and related factors in patients with chronic liver disease. . 2015; 19(6): 590-5.                                                                                                                            |           | 2011-2012 | Scientific literature |
| Cirrhosis and other chronic liver diseases due to hepatitis C  | Ministry of Health (Brazil). Brazil Hospital Information System 1997. Rio de Janeiro, Brazil: Ministry of Health (Brazil).                                                                                                                                                                                      | Country   | 1993-1997 | Administrative record |
| Cirrhosis and other chronic liver diseases due to hepatitis C  | Goncalves PL, Zago-Gomes, Mda P, Marques CC, Mendona AT, Goncalves CS, Pereira FE. Etiology of liver cirrhosis in Brazil: chronic alcoholism and hepatitis viruses in liver cirrhosis diagnosed in the state of Espirito Santo. . 2013; 68(3): 291-5.                                                           |           | 1993-2011 | Scientific literature |
| Cirrhosis and other chronic liver diseases due to hepatitis C  | Ministry of Health (Brazil). Brazil Hospital Information System 2003-2007.                                                                                                                                                                                                                                      |           | 2003-2007 | Administrative record |
| Cirrhosis and other chronic liver diseases due to              | Ministry of Health (Brazil). Brazil Hospital Information System 2013-2014.                                                                                                                                                                                                                                      |           | 2013-2017 | Administrative record |
| Cirrhosis and other chronic liver diseases due to              | Ministry of Health (Brazil). Brazil Hospital Information System 2008-2012.                                                                                                                                                                                                                                      |           | 2008-2012 | Administrative record |
| Cirrhosis and other chronic liver diseases due to              | Ministry of Health (Brazil). Brazil Hospital Information System 2008-2012.                                                                                                                                                                                                                                      |           | 2008-2012 | Administrative record |
| Cirrhosis and other chronic liver diseases due to alcohol use  | Ministry of Health (Brazil). Brazil Hospital Information System 1997. Rio de Janeiro, Brazil: Ministry of Health (Brazil).                                                                                                                                                                                      | Country   | 1993-1997 | Administrative record |
| Cirrhosis and other chronic liver diseases due to              | Ministry of Health (Brazil). Brazil Hospital Information System 2013-2014.                                                                                                                                                                                                                                      |           | 2013-2017 | Administrative record |
| Cirrhosis and other chronic liver diseases due to              | Ministry of Health (Brazil). Brazil Hospital Information System 2003-2007.                                                                                                                                                                                                                                      |           | 2003-2007 | Administrative record |
| Cirrhosis and other chronic liver diseases due to              | Ministry of Health (Brazil). Brazil Hospital Information System 1998-2002.                                                                                                                                                                                                                                      |           | 1998-2002 | Administrative record |
| Cirrhosis and other chronic liver diseases due to alcohol use  | Souza NP, Villar LM, Garbin AJ, Rovida TA, Garbin CA. Assessment of health-related quality of life and related factors in patients with chronic liver disease. . 2015; 19(6): 590-5.                                                                                                                            |           | 2011-2012 | Scientific literature |
| Cirrhosis and other chronic liver diseases due to alcohol use  | Goncalves PL, Zago-Gomes, Mda P, Marques CC, Mendona AT, Goncalves CS, Pereira FE. Etiology of liver cirrhosis in Brazil: chronic alcoholism and hepatitis viruses in liver cirrhosis diagnosed in the state of Espirito Santo. . 2013; 68(3): 291-5.                                                           |           | 1993-2011 | Scientific literature |
| Cirrhosis and other chronic liver diseases due to alcohol use  | Ministry of Health (Brazil). Brazil Hospital Information System 1998-2002.                                                                                                                                                                                                                                      |           | 1998-2002 | Administrative record |
| Cirrhosis and other chronic liver diseases due to other causes | Ministry of Health (Brazil). Brazil Hospital Information System 1997. Rio de Janeiro, Brazil: Ministry of Health (Brazil).                                                                                                                                                                                      | Country   | 1993-1997 | Administrative record |
| Cirrhosis and other chronic liver diseases due to other causes | Souza NP, Villar LM, Garbin AJ, Rovida TA, Garbin CA. Assessment of health-related quality of life and related factors in patients with chronic liver disease. . 2015; 19(6): 590-5.                                                                                                                            |           | 2011-2012 | Scientific literature |
| Cirrhosis and other chronic liver diseases due to              | Ministry of Health (Brazil). Brazil Hospital Information System 2013-2014.                                                                                                                                                                                                                                      |           | 2013-2017 | Administrative record |
| Cirrhosis and other chronic liver diseases due to              | Ministry of Health (Brazil). Brazil Hospital Information System 2003-2007.                                                                                                                                                                                                                                      |           | 2003-2007 | Administrative record |
| Cirrhosis and other chronic liver diseases due to              | Ministry of Health (Brazil). Brazil Hospital Information System 2008-2012.                                                                                                                                                                                                                                      |           | 2008-2012 | Administrative record |
| Cirrhosis and other chronic liver diseases due to other causes | Goncalves PL, Zago-Gomes, Mda P, Marques CC, Mendona AT, Goncalves CS, Pereira FE. Etiology of liver cirrhosis in Brazil: chronic alcoholism and hepatitis viruses in liver cirrhosis diagnosed in the state of Espirito Santo. . 2013; 68(3): 291-5.                                                           |           | 1993-2011 | Scientific literature |
| Peptic ulcer disease                                           | Health Institute (São Paulo, Brazil), State University of Campinas, São Paulo Municipal Health Department, São Paulo State University, University of São Paulo. Brazil - São Paulo Health Survey 2008-2009.                                                                                                     | São Paulo | 2002-2008 | Survey                |
| Peptic ulcer disease                                           | Ministry of Health (Brazil). Brazil Hospital Information System 2003-2007.                                                                                                                                                                                                                                      |           | 2003-2007 | Administrative record |
| Peptic ulcer disease                                           | Ministry of Health (Brazil). Brazil Hospital Information System 1997. Rio de Janeiro, Brazil: Ministry of Health (Brazil).                                                                                                                                                                                      | Country   | 1993-1997 | Administrative record |
| Peptic ulcer disease                                           | Ministry of Health (Brazil). Brazil Hospital Information System 1998-2002.                                                                                                                                                                                                                                      |           | 1998-2002 | Administrative record |
| Peptic ulcer disease                                           | Brazilian Institute of Geography and Statistics (IBGE), Ministry of Health (Brazil), Ministry of Planning, Budget, and Management (Brazil). Brazil National Health Survey 2013. Rio de Janeiro, Brazil: Brazilian Institute of Geography and Statistics (IBGE).                                                 | Country   | 2013-2014 | Survey                |
| Peptic ulcer disease                                           | Brazil World Health Survey 2003                                                                                                                                                                                                                                                                                 | Country   | 2002-2003 | Survey                |
| Peptic ulcer disease                                           | Ministry of Health (Brazil). Brazil Hospital Information System 2008-2012.                                                                                                                                                                                                                                      |           | 2008-2012 | Administrative record |
| Peptic ulcer disease                                           | Ministry of Health (Brazil). Brazil Hospital Information System 2013-2014.                                                                                                                                                                                                                                      |           | 2013-2017 | Administrative record |
| Peptic ulcer disease                                           | Ministry of Health (Brazil). Brazil Hospital Information System 2003-2007.                                                                                                                                                                                                                                      |           | 2003-2007 | Administrative record |
| Gastritis and duodenitis                                       | Ministry of Health (Brazil). Brazil Hospital Information System 1997. Rio de Janeiro, Brazil: Ministry of Health (Brazil).                                                                                                                                                                                      | Country   | 1993-1997 | Administrative record |
| Gastritis and duodenitis                                       | Ministry of Health (Brazil).                                                                                                                                                                                                                                                                                    |           | 1993-1997 | Administrative record |
| Gastritis and duodenitis                                       | Ministry of Health (Brazil). Brazil Hospital Information System 2013-2014.                                                                                                                                                                                                                                      |           | 2013-2017 | Administrative record |

|                                            |                                                                                                                                                                                                                                                                                                                                                                                                                                             |           |           |                       |
|--------------------------------------------|---------------------------------------------------------------------------------------------------------------------------------------------------------------------------------------------------------------------------------------------------------------------------------------------------------------------------------------------------------------------------------------------------------------------------------------------|-----------|-----------|-----------------------|
| Gastritis and duodenitis                   | Brazilian Institute of Geography and Statistics (IBGE), Ministry of Health (Brazil), Ministry of Planning, Budget, and Management (Brazil), Brazil National Health Survey 2013. Rio de Janeiro, Brazil: Brazilian Institute of Geography and Statistics (IBGE).                                                                                                                                                                             | Country   | 2013-2014 | Survey                |
| Gastritis and duodenitis                   | Ministry of Health (Brazil). Brazil Hospital Information System 2008-2012.                                                                                                                                                                                                                                                                                                                                                                  |           | 2008-2012 | Administrative record |
| Gastritis and duodenitis                   | Brazil World Health Survey 2003                                                                                                                                                                                                                                                                                                                                                                                                             | Country   | 2002-2003 | Survey                |
| Gastritis and duodenitis                   | Ministry of Health (Brazil). Brazil Hospital Information System 1998-2002.                                                                                                                                                                                                                                                                                                                                                                  |           | 1998-2002 | Administrative record |
| Gastritis and duodenitis                   | Health Institute (São Paulo, Brazil), State University of Campinas, São Paulo Municipal Health Department, São Paulo State University, University of São Paulo. Brazil - São Paulo Health Survey 2008-2009.                                                                                                                                                                                                                                 | São Paulo | 2002-2008 | Survey                |
| Appendicitis                               | Ministry of Health (Brazil). Brazil Hospital Information System 2008-2012.                                                                                                                                                                                                                                                                                                                                                                  |           | 2008-2012 | Administrative record |
| Appendicitis                               | Health Institute (São Paulo, Brazil), State University of Campinas, São Paulo Municipal Health Department, São Paulo State University, University of São Paulo. Brazil - São Paulo Health Survey 2008-2009.                                                                                                                                                                                                                                 | São Paulo | 2002-2008 | Survey                |
| Appendicitis                               | Ministry of Health (Brazil). Brazil Hospital Information System 2003-2007.                                                                                                                                                                                                                                                                                                                                                                  |           | 2003-2007 | Administrative record |
| Appendicitis                               | Ministry of Health (Brazil). Brazil Hospital Information System 1998-2002.                                                                                                                                                                                                                                                                                                                                                                  |           | 1998-2002 | Administrative record |
| Appendicitis                               | Ministry of Health (Brazil). Brazil Hospital Information System 2013-2014.                                                                                                                                                                                                                                                                                                                                                                  |           | 2013-2017 | Administrative record |
| Appendicitis                               | Brazilian Institute of Geography and Statistics (IBGE), Ministry of Health (Brazil), Ministry of Planning, Budget, and Management (Brazil), Brazil National Health Survey 2013. Rio de Janeiro, Brazil: Brazilian Institute of Geography and Statistics (IBGE).                                                                                                                                                                             | Country   | 2013-2014 | Survey                |
| Appendicitis                               | Ministry of Health (Brazil). Brazil Hospital Information System 1997. Rio de Janeiro, Brazil: Ministry of Health (Brazil).                                                                                                                                                                                                                                                                                                                  | Country   | 1993-1997 | Administrative record |
| Appendicitis                               | Brazil World Health Survey 2003                                                                                                                                                                                                                                                                                                                                                                                                             | Country   | 2002-2003 | Survey                |
| Paralytic ileus and intestinal obstruction | Ministry of Health (Brazil). Brazil Hospital Information System 2008-2012.                                                                                                                                                                                                                                                                                                                                                                  |           | 2008-2012 | Administrative record |
| Paralytic ileus and intestinal obstruction | Ministry of Health (Brazil). Brazil Hospital Information System 1998-2002.                                                                                                                                                                                                                                                                                                                                                                  |           | 1998-2002 | Administrative record |
| Paralytic ileus and intestinal obstruction | Brazilian Institute of Geography and Statistics (IBGE), Ministry of Health (Brazil), Ministry of Planning, Budget, and Management (Brazil), Brazil National Health Survey 2013. Rio de Janeiro, Brazil: Brazilian Institute of Geography and Statistics (IBGE).                                                                                                                                                                             | Country   | 2013-2014 | Survey                |
| Paralytic ileus and intestinal obstruction | Ministry of Health (Brazil). Brazil Hospital Information System 2013-2014.                                                                                                                                                                                                                                                                                                                                                                  |           | 2013-2017 | Administrative record |
| Paralytic ileus and intestinal obstruction | Brazil World Health Survey 2003                                                                                                                                                                                                                                                                                                                                                                                                             | Country   | 2002-2003 | Survey                |
| Paralytic ileus and intestinal obstruction | Ministry of Health (Brazil). Brazil Hospital Information System 1997. Rio de Janeiro, Brazil: Ministry of Health (Brazil).                                                                                                                                                                                                                                                                                                                  | Country   | 1993-1997 | Administrative record |
| Paralytic ileus and intestinal obstruction | Ministry of Health (Brazil). Brazil Hospital Information System 2003-2007.                                                                                                                                                                                                                                                                                                                                                                  |           | 2003-2007 | Administrative record |
| Paralytic ileus and intestinal obstruction | Health Institute (São Paulo, Brazil), State University of Campinas, São Paulo Municipal Health Department, São Paulo State University, University of São Paulo. Brazil - São Paulo Health Survey 2008-2009.                                                                                                                                                                                                                                 | São Paulo | 2002-2008 | Survey                |
| Inguinal, femoral, and abdominal hernia    | Ministry of Health (Brazil). Brazil Hospital Information System 2013-2014.                                                                                                                                                                                                                                                                                                                                                                  |           | 2013-2017 | Administrative record |
| Inguinal, femoral, and abdominal hernia    | Ministry of Health (Brazil). Brazil Hospital Information System 1997. Rio de Janeiro, Brazil: Ministry of Health (Brazil).                                                                                                                                                                                                                                                                                                                  | Country   | 1993-1997 | Administrative record |
| Inguinal, femoral, and abdominal hernia    | Ministry of Health (Brazil). Brazil Hospital Information System 1998-2002.                                                                                                                                                                                                                                                                                                                                                                  |           | 1998-2002 | Administrative record |
| Inguinal, femoral, and abdominal hernia    | Ministry of Health (Brazil). Brazil Hospital Information System 2003-2007.                                                                                                                                                                                                                                                                                                                                                                  |           | 2003-2007 | Administrative record |
| Inguinal, femoral, and abdominal hernia    | Brazilian Institute of Geography and Statistics (IBGE), Ministry of Health (Brazil), Ministry of Planning, Budget, and Management (Brazil), Brazil National Health Survey 2013. Rio de Janeiro, Brazil: Brazilian Institute of Geography and Statistics (IBGE).                                                                                                                                                                             | Country   | 2013-2014 | Survey                |
| Inguinal, femoral, and abdominal hernia    | Ministry of Health (Brazil). Brazil Hospital Information System 2008-2012.                                                                                                                                                                                                                                                                                                                                                                  |           | 2008-2012 | Administrative record |
| Inguinal, femoral, and abdominal hernia    | Health Institute (São Paulo, Brazil), State University of Campinas, São Paulo Municipal Health Department, São Paulo State University, University of São Paulo. Brazil - São Paulo Health Survey 2008-2009.                                                                                                                                                                                                                                 | São Paulo | 2002-2008 | Survey                |
| Inguinal, femoral, and abdominal hernia    | Brazil World Health Survey 2003                                                                                                                                                                                                                                                                                                                                                                                                             | Country   | 2002-2003 | Survey                |
| Inguinal, femoral, and abdominal hernia    | Brazil World Health Survey 2003                                                                                                                                                                                                                                                                                                                                                                                                             | Country   | 2002-2003 | Survey                |
| Inflammatory bowel disease                 | Ministry of Health (Brazil). Brazil Hospital Information System 1997. Rio de Janeiro, Brazil: Ministry of Health (Brazil).                                                                                                                                                                                                                                                                                                                  | Country   | 1993-1997 | Administrative record |
| Inflammatory bowel disease                 | Ministry of Health (Brazil). Brazil Hospital Information System 2013-2014.                                                                                                                                                                                                                                                                                                                                                                  |           | 2013-2017 | Administrative record |
| Inflammatory bowel disease                 | Ministry of Health (Brazil). Brazil Hospital Information System 2003-2007.                                                                                                                                                                                                                                                                                                                                                                  |           | 2003-2007 | Administrative record |
| Inflammatory bowel disease                 | Health Institute (São Paulo, Brazil), State University of Campinas, São Paulo Municipal Health Department, São Paulo State University, University of São Paulo. Brazil - São Paulo Health Survey 2008-2009.                                                                                                                                                                                                                                 | São Paulo | 2002-2008 | Survey                |
| Inflammatory bowel disease                 | Brazilian Institute of Geography and Statistics (IBGE), Ministry of Health (Brazil), Ministry of Planning, Budget, and Management (Brazil), Brazil National Health Survey 2013. Rio de Janeiro, Brazil: Brazilian Institute of Geography and Statistics (IBGE).                                                                                                                                                                             | Country   | 2013-2014 | Survey                |
| Inflammatory bowel disease                 | Ministry of Health (Brazil). Brazil Hospital Information System 1998-2002.                                                                                                                                                                                                                                                                                                                                                                  |           | 1998-2002 | Administrative record |
| Inflammatory bowel disease                 | Victoria CR, Sasaki LY, Nunes HR de C. Incidence and prevalence rates of inflammatory bowel diseases, in midwestern of São Paulo State, Brazil. . 2009; 46(1): 20-5.                                                                                                                                                                                                                                                                        |           | 1986-2005 | Scientific literature |
| Inflammatory bowel disease                 | Ministry of Health (Brazil). Brazil Hospital Information System 2008-2012.                                                                                                                                                                                                                                                                                                                                                                  |           | 2008-2012 | Administrative record |
| Inflammatory bowel disease                 | Health Institute (São Paulo, Brazil), State University of Campinas, São Paulo Municipal Health Department, São Paulo State University, University of São Paulo. Brazil - São Paulo Health Survey 2008-2009.                                                                                                                                                                                                                                 | São Paulo | 2002-2008 | Survey                |
| Vascular intestinal disorders              | Ministry of Health (Brazil). Brazil Hospital Information System 1998-2002.                                                                                                                                                                                                                                                                                                                                                                  |           | 1998-2002 | Administrative record |
| Vascular intestinal disorders              | Ministry of Health (Brazil). Brazil Hospital Information System 2003-2007.                                                                                                                                                                                                                                                                                                                                                                  |           | 2003-2007 | Administrative record |
| Vascular intestinal disorders              | Brazilian Institute of Geography and Statistics (IBGE), Ministry of Health (Brazil), Ministry of Planning, Budget, and Management (Brazil), Brazil National Health Survey 2013. Rio de Janeiro, Brazil: Brazilian Institute of Geography and Statistics (IBGE).                                                                                                                                                                             | Country   | 2013-2014 | Survey                |
| Vascular intestinal disorders              | Ministry of Health (Brazil). Brazil Hospital Information System 2008-2012.                                                                                                                                                                                                                                                                                                                                                                  |           | 2008-2012 | Administrative record |
| Vascular intestinal disorders              | Ministry of Health (Brazil). Brazil Hospital Information System 2013-2014.                                                                                                                                                                                                                                                                                                                                                                  |           | 2013-2017 | Administrative record |
| Vascular intestinal disorders              | Brazil World Health Survey 2003                                                                                                                                                                                                                                                                                                                                                                                                             | Country   | 2002-2003 | Survey                |
| Vascular intestinal disorders              | Ministry of Health (Brazil). Brazil Hospital Information System 1997. Rio de Janeiro, Brazil: Ministry of Health (Brazil).                                                                                                                                                                                                                                                                                                                  | Country   | 1993-1997 | Administrative record |
| Vascular intestinal disorders              | Ministry of Health (Brazil). Brazil Hospital Information System 1997. Rio de Janeiro, Brazil: Ministry of Health (Brazil).                                                                                                                                                                                                                                                                                                                  | Country   | 1993-1997 | Administrative record |
| Gallbladder and biliary diseases           | Ministry of Health (Brazil). Brazil Hospital Information System 2008-2012.                                                                                                                                                                                                                                                                                                                                                                  |           | 2008-2012 | Administrative record |
| Gallbladder and biliary diseases           | Brazil World Health Survey 2003                                                                                                                                                                                                                                                                                                                                                                                                             | Country   | 2002-2003 | Survey                |
| Gallbladder and biliary diseases           | Health Institute (São Paulo, Brazil), State University of Campinas, São Paulo Municipal Health Department, São Paulo State University, University of São Paulo. Brazil - São Paulo Health Survey 2008-2009.                                                                                                                                                                                                                                 | São Paulo | 2002-2008 | Survey                |
| Gallbladder and biliary diseases           | Ministry of Health (Brazil). Brazil Hospital Information System 2003-2007.                                                                                                                                                                                                                                                                                                                                                                  |           | 2003-2007 | Administrative record |
| Gallbladder and biliary diseases           | Ministry of Health (Brazil). Brazil Hospital Information System 1998-2002.                                                                                                                                                                                                                                                                                                                                                                  |           | 1998-2002 | Administrative record |
| Gallbladder and biliary diseases           | Brazilian Institute of Geography and Statistics (IBGE), Ministry of Health (Brazil), Ministry of Planning, Budget, and Management (Brazil), Brazil National Health Survey 2013. Rio de Janeiro, Brazil: Brazilian Institute of Geography and Statistics (IBGE).                                                                                                                                                                             | Country   | 2013-2014 | Survey                |
| Gallbladder and biliary diseases           | Ministry of Health (Brazil). Brazil Hospital Information System 2013-2014.                                                                                                                                                                                                                                                                                                                                                                  |           | 2013-2017 | Administrative record |
| Pancreatitis                               | Ministry of Health (Brazil). Brazil Hospital Information System 2008-2012.                                                                                                                                                                                                                                                                                                                                                                  |           | 2008-2012 | Administrative record |
| Pancreatitis                               | Ministry of Health (Brazil). Brazil Hospital Information System 2013-2014.                                                                                                                                                                                                                                                                                                                                                                  |           | 2013-2017 | Administrative record |
| Pancreatitis                               | Ministry of Health (Brazil). Brazil Hospital Information System 1997. Rio de Janeiro, Brazil: Ministry of Health (Brazil).                                                                                                                                                                                                                                                                                                                  | Country   | 1993-1997 | Administrative record |
| Pancreatitis                               | Health Institute (São Paulo, Brazil), State University of Campinas, São Paulo Municipal Health Department, São Paulo State University, University of São Paulo. Brazil - São Paulo Health Survey 2008-2009.                                                                                                                                                                                                                                 | São Paulo | 2002-2008 | Survey                |
| Pancreatitis                               | Ministry of Health (Brazil). Brazil Hospital Information System 2003-2007.                                                                                                                                                                                                                                                                                                                                                                  |           | 2003-2007 | Administrative record |
| Pancreatitis                               | Brazilian Institute of Geography and Statistics (IBGE), Ministry of Health (Brazil), Ministry of Planning, Budget, and Management (Brazil), Brazil National Health Survey 2013. Rio de Janeiro, Brazil: Brazilian Institute of Geography and Statistics (IBGE).                                                                                                                                                                             | Country   | 2013-2014 | Survey                |
| Pancreatitis                               | Ministry of Health (Brazil). Brazil Hospital Information System 1998-2002.                                                                                                                                                                                                                                                                                                                                                                  |           | 1998-2002 | Administrative record |
| Pancreatitis                               | Brazil World Health Survey 2003                                                                                                                                                                                                                                                                                                                                                                                                             | Country   | 2002-2003 | Survey                |
| Alzheimer disease and other dementias      | Bottino CMC, Azevedo DJr, Tatsch M, Hototian SR, Moscoso MA, Folquillo J, Scalco AZ, Bazzarella MC, Lopes MA, Litvov J. Estimate of dementia prevalence in a community sample from São Paulo, Brazil. . 2008; 26(4): 291-9.                                                                                                                                                                                                                 |           | 2002-2003 | Scientific literature |
| Alzheimer disease and other dementias      | Scazufca M, Menezes PR, Vallada HP, Crepaldi AL, Pastor-Valero M, Coutinho LMS, Di Rienzo VD, Almeida OP. High prevalence of dementia among older adults from poor socioeconomic backgrounds in São Paulo, Brazil. . 2008; 20(2): 394-405.                                                                                                                                                                                                  |           | 2003-2005 | Scientific literature |
| Alzheimer disease and other dementias      | Cesar KG, Brucki SM, Takada LT, Nascimento LF, Gomes CM, Almeida MC, Oliveira MO, Porto FH, Senaha ML, Bahia VS, Silva TB, Ianof JN, Spindola L, Schmidt MT, Jorge MS, Vale PH, Cecchini MA, Cassimiro L, Soares RT, Gonçalves MR, Martins AC, Dare P, Smid J, Porto CS, Carthey-Goulart MT, Yassuda MS, Mansur LL, Nitrini R. Prevalence of Cognitive Impairment Without Dementia and Dementia in Tremembe, Brazil. . 2016; 30(3): 264-71. |           | 2013-2015 | Scientific literature |
| Alzheimer disease and other dementias      | Institute for Health Metrics and Evaluation (IHME). IHME DisMod Alzheimer Disease and Other Dementias Excess Mortality Estimates.                                                                                                                                                                                                                                                                                                           | Global    | 1990-2016 | Modeled data          |

|                                       |                                                                                                                                                                                                                                                                                      |         |           |                       |
|---------------------------------------|--------------------------------------------------------------------------------------------------------------------------------------------------------------------------------------------------------------------------------------------------------------------------------------|---------|-----------|-----------------------|
| Alzheimer disease and other dementias | Fichman H, Porto CS, Carthey MT, Hartmann APJ, Huang N, Smid J, Lima EP, Takada LT, Takahashi DY. Incidence of dementia in a community-dwelling Brazilian population. . 2004; 18(4): 241-6.                                                                                          |         | 1997-2000 | Scientific literature |
| Alzheimer disease and other dementias | Herrera E Jr, Caramelli P, Silveira ASB, Nitri R. Epidemiologic survey of dementia in a community-dwelling Brazilian population. . 2002; 16(2): 103-8.                                                                                                                               |         | 1997-1998 | Scientific literature |
| Alzheimer disease and other dementias | Lopes MA, Ferrioli E, Nakano EY, Litvoc J, Bottino CMC. High prevalence of dementia in a community-based survey of older people from Brazil: association with intellectual activity rather than education. . 2012; 32(2): 307-16.                                                    |         | 2009-2011 | Scientific literature |
| Parkinson disease                     | Institute for Health Metrics and Evaluation (IHME). IHME DisMod Parkinson's Disease Excess Mortality Estimates.                                                                                                                                                                      | Global  | 1990-2016 | Modeled data          |
| Parkinson disease                     | Munhoz RP, Teive HA, Eleftherohorinou H, Cohn LJ, Lees AJ, Silveira-Moriyama L. Demographic and motor features associated with the occurrence of neuropsychiatric and sleep complications of Parkinson's disease. . 2013; 84(8): 883-7.                                              |         | 0         | Scientific literature |
| Epilepsy                              | Noronha ALA, Borges MA, Marques LHN, Zanetta DMT, Fernandes PT, de Boer H, Espindola J, Miranda CT, Prillipko L, Bell GS, Sander JW, Li LM. Prevalence and pattern of epilepsy treatment in different socioeconomic classes in Brazil. . 2007; 48(5): 880-5.                         |         | 2002      | Scientific literature |
| Epilepsy                              | Gomes MD M da M, Zetoune RG, Kropf LAL, Beeck ED E da S van. A house-to-house survey of epileptic seizures in an urban community of Rio de Janeiro, Brazil. . 2002; 60(3-8): 708-11.                                                                                                 |         | 2000-2001 | Scientific literature |
| Epilepsy                              | Fernandes J, Schmidt M, Monte T, Tozzi S, Sander J. Prevalence of epilepsy: the Porto Alegre Study. . 1992; 33(Suppl 3): 132.                                                                                                                                                        |         | 1992      | Scientific literature |
| Epilepsy                              | factors in children under five living in a deprived municipality of southern Brazil. . 2007; 65(3A): 581-6.                                                                                                                                                                          |         | 1998-1999 | Scientific literature |
| Epilepsy                              | Marino Junior R, Cukiert A, Pinho E. Aspectos epidemiológicos da epilepsia em São Paulo: um estudo da prevalência. . 1986; 44(3): 243-54.                                                                                                                                            |         | 1984-1985 | Scientific literature |
| Epilepsy                              | Li LM, Fernandes PT, Noronha ALA, Marques LHN, Borges MA, Cendes F, Guerreiro CAM, Zanetta DMT, de Boer HM, Espindola J, Miranda CT, Prillipko L, Sander JW. Demonstration Project on Epilepsy in Brazil: situation assessment. . 2007; 65(Suppl 1): 5-13.                           |         | 2007      | Scientific literature |
| Epilepsy                              | Arruda WO. Etiology of epilepsy. A prospective study of 210 cases. . 1991; 49(3): 251-6.                                                                                                                                                                                             | Country | 1991      | Scientific literature |
| Epilepsy                              | Nunes ML, Geib LTC, Grupo Apego. Incidence of epilepsy and seizure disorders in childhood and association with social determinants: a birth cohort study. . 2011; 87(1): 50-6.                                                                                                       |         | 2003-2007 | Scientific literature |
| Epilepsy                              | Valença MM, Valença LP. [Etiology of the epileptic seizures in Recife city, Brazil: study of 249 patients]. . 2000; 58(4): 1064-2.                                                                                                                                                   | Country | 1996-1999 | Scientific literature |
| Epilepsy                              | Borges MA, Barros EP de, Zanetta DMT, Borges APP. [Prevalence of epilepsy in Bakairi Indians from Mato Grosso State, Brazil]. . 2002; 60(1): 80-5.                                                                                                                                   |         | 2000      | Scientific literature |
| Multiple sclerosis                    | Arruda WO, Scola RH, Teive HA, Werneck LC. Multiple sclerosis: report on 200 cases from Curitiba, Southern Brazil and comparison with other Brazilian series. . 2001; 59(2-A): 165-70.                                                                                               |         | 0         | Scientific literature |
| Multiple sclerosis                    | Callegaro D, de Lollo CA, Radvany J, Tilbery CP, Mendonça RA, Melo AC. Prevalence of multiple sclerosis in the city of São Paulo, Brazil, in 1990. . 1992; 11(1): 11-4.                                                                                                              |         | 1990      | Scientific literature |
| Multiple sclerosis                    | Lana-Peikoto MA, Frota ERC, Campos GB, Monteiro LP, Brazilian Committee for Treatment and Research in Multiple Sclerosis. The prevalence of multiple sclerosis in Belo Horizonte, Brazil. . 2012; 70(2): 102-7.                                                                      |         | 0-2001    | Scientific literature |
| Multiple sclerosis                    | Callegaro D, Goldbaum M, Morais L, Tilbery CP, Moreira MA, Gabbal AA, Scaff M. The prevalence of multiple sclerosis in the city of São Paulo, Brazil, 1997. . 2001; 104(4): 208-13.                                                                                                  |         | 1997      | Scientific literature |
| Multiple sclerosis                    | da Silva NL, Takemoto ML, Damasceno A, Fragozo YD, Finkelsztejn A, Becker J, Gonçalves MV, Tilbery C, de Oliveira EM, Callegaro D, Boulos FC. Cost analysis of multiple sclerosis in Brazil: a cross-sectional multicenter study. . 2016; 16(0): 102.                                |         | 0         | Scientific literature |
| Motor neuron disease                  | amyotrophic lateral sclerosis in the city of Porto Alegre, in Southern Brazil. . 2013; 71(12): 959-62.                                                                                                                                                                               |         | 2010      | Scientific literature |
| Migraine                              | Queiroz LP, Bares LM, Blank N. An epidemiological study of headache in Florianópolis, Brazil. . 2006; 26(2): 122-7.                                                                                                                                                                  |         | 1982-2000 | Scientific literature |
| Migraine                              | Bensenor IM, Goulart AC, Lotufo PA, Menezes PR, Scazufca M. Cardiovascular risk factors associated with migraine among the elderly with a low income: the Sao Paulo Ageing and Health Study (SPAH). . 2011; 31(3): 331-7.                                                            |         | 2003-2005 | Scientific literature |
| Migraine                              | Wiehe M, Fuchs SC, Moreira LB, Moraes RS, Fuchs FD. Migraine is more frequent in individuals with optimal and normal blood pressure: a population-based study. . 2002; 20(7): 1303-6.                                                                                                |         | 1996-1998 | Scientific literature |
| Migraine                              | Garrido J, Macías-Islas M, Monzillo P, Nunez L, Plascencia N, Rodriguez C, Takeuchi Y. Latin American Migraine Study Group. Prevalence of migraine in Latin America. . 2005; 45(2): 106-17.                                                                                          |         | 1999      | Scientific literature |
| Migraine                              | Bensenor IM, Lotufo PA, Goulart AC, Menezes PR, Scazufca M. The prevalence of headache among elderly in a low-income area of São Paulo, Brazil. . 2008; 28(4): 329-33.                                                                                                               |         | 2003-2005 | Scientific literature |
| Migraine                              | Da Silva A Jr, Costa EC, Gomes JB, Leite FM, Gomez RS, Vasconcelos LP, Krymchantowski A, Moreira P, Teixeira AL. Chronic headache and comorbidities: a two-phase, population-based, cross-sectional study. . 2010; 50(8): 1306-12.                                                   |         | 2005-2006 | Scientific literature |
| Migraine                              | Arruda MA, Guidetti V, Galli F, Albuquerque RCAP, Bigal ME. Primary headaches in childhood: a population-based study. . 2010; 30(9): 1056-64.                                                                                                                                        |         | 2009      | Scientific literature |
| Migraine                              | Arruda MA, Bigal ME. Behavioral and emotional symptoms and primary headaches in children: a population-based study. . 2012; 32(15): 1093-100.                                                                                                                                        |         | 2009      | Scientific literature |
| Migraine                              | Falavigna A, Teles AR, Velho MC, Vedana VM, Silva RC da, Mazzocchin T, Basso M, Braga GL de. Prevalence and impact of headache in undergraduate students in Southern Brazil. . 2010; 68(6): 873-7.                                                                                   |         | 2009      | Scientific literature |
| Migraine                              | Falavigna A, Teles AR, Velho MC, Vedana VM, Silva RC da, Mazzocchin T, Basso M, Braga GL de. Prevalence and impact of headache in undergraduate students in Southern Brazil. . 2010; 68(6): 873-7.                                                                                   |         | 2009      | Scientific literature |
| Tension-type headache                 | Wiehe M, Fuchs SC, Moreira LB, Moraes RS, Fuchs FD. Migraine is more frequent in individuals with optimal and normal blood pressure: a population-based study. . 2002; 20(7): 1303-6.                                                                                                |         | 1996-1998 | Scientific literature |
| Tension-type headache                 | Bensenor IM, Lotufo PA, Goulart AC, Menezes PR, Scazufca M. The prevalence of headache among elderly in a low-income area of São Paulo, Brazil. . 2008; 28(4): 329-33.                                                                                                               |         | 2003-2005 | Scientific literature |
| Tension-type headache                 | Da Silva A Jr, Costa EC, Gomes JB, Leite FM, Gomez RS, Vasconcelos LP, Krymchantowski A, Moreira P, Teixeira AL. Chronic headache and comorbidities: a two-phase, population-based, cross-sectional study. . 2010; 50(8): 1306-12.                                                   |         | 2005-2006 | Scientific literature |
| Tension-type headache                 | Queiroz LP, Peres MFF, Pivovarov EJ, Kovacs F, Ciccarelli MC, Souza JA, Zukerman E. A nationwide population-based study of tension-type headache in Brazil. . 2009; 49(1): 71-8.                                                                                                     |         | 2006-2007 | Scientific literature |
| Tension-type headache                 | Arruda MA, Bigal ME. Behavioral and emotional symptoms and primary headaches in children: a population-based study. . 2012; 32(15): 1093-100.                                                                                                                                        |         | 2009      | Scientific literature |
| Tension-type headache                 | de Siqueira SR, Vilela TT, Florindo AA. Prevalence of headache and orofacial pain in adults and elders in a Brazilian community: an epidemiological study. . 2015; 32(2): 123-31.                                                                                                    |         | 2011-2012 | Scientific literature |
| Tension-type headache                 | Ferreira KDS, Speciali JG. Epidemiology of chronic pain in the office of a pain specialist neurologist. . 2015; 73(7): 582-5.                                                                                                                                                        |         | 2008      | Scientific literature |
| Alcohol use disorders                 | RA, de Mello MF, Prince M, Ferri CP, Coutinho ES, Andreoli SB. The impact of epidemic violence on the prevalence of psychiatric disorders in São Paulo and Rio de Janeiro, Brazil. . 2013; 8(5): e63545.                                                                             |         | 2007-2008 | Scientific literature |
| Alcohol use disorders                 | Coelho CLS, Laranjeira RR, Santos JLF, Pinsky I, Zaleski M, Caetano R, Crippa JAS. Depressive symptoms and alcohol correlates among Brazilians aged 14 years and older: a cross-sectional study. . 2014; 9: 29.                                                                      |         | 2005-2006 | Scientific literature |
| Alcohol use disorders                 | Ipsos, National Institute of Public Policy for Alcohol and Other Drugs (INPAD) (Brazil), University of São Paulo. Brazil National Alcohol and Drugs Survey 2011-2012.                                                                                                                | Country | 2011-2012 | Survey                |
| Alcohol use disorders                 | National Institute of Public Policy for Alcohol and Other Drugs (INPAD) (Brazil), Brazil National Alcohol Survey 2005-2006.                                                                                                                                                          | Country | 2005-2006 | Survey                |
| Alcohol use disorders                 | World Health Organization (WHO). Mental Illness in General Health Care: An International Study. Geneva, Switzerland: World Health Organization (WHO), 1995.                                                                                                                          | Country | 1991-1992 | Report                |
| Alcohol use disorders                 | Grinfeld H, Goldenberg S, Segre CA, Chad G. Fetal alcohol syndrome in São Paulo, Brazil. . 1999; 13(4): 496-7.                                                                                                                                                                       |         | 1997      | Scientific literature |
| Alcohol use disorders                 | Ferreira LN, Bispo Junior JP, Sales ZN, Casotti CA, Braga Junior ACR. [Prevalence and associated factors of alcohol abuse and alcohol addiction]. . 2013; 18(11): 3409-18.                                                                                                           |         | 2010      | Scientific literature |
| Alcohol use disorders                 | Ministry of Health (Brazil). Brazil Live Birth Information System SINASC 2007.                                                                                                                                                                                                       | Country | 2007      | Vital registration    |
| Alcohol use disorders                 | Ministry of Health (Brazil). Brazil Live Birth Information System SINASC 2006. Rio de Janeiro, Brazil: Ministry of Health (Brazil).                                                                                                                                                  | Country | 2006      | Vital registration    |
| Alcohol use disorders                 | Barros MB, Marin-Leó L, Oliveira HB, Dalgalarondo P, Botega JN. Alcohol drinking patterns: social and demographic differences in the municipality of Campinas, state of São Paulo, Brazil, 2003. . 2008; 17(4): 259-70.                                                              |         | 2003      | Scientific literature |
| Alcohol use disorders                 | Silveira CM, Siu ER, Anthony JC, Salito LP, de Andrade AG, Kutschenko A, Viana MC, Wang Y-P, Martins SS, Andrade LH. Drinking patterns and alcohol use disorders in São Paulo, Brazil: the role of neighborhood social deprivation and socioeconomic status. . 2014; 9(10): e108355. |         | 2005-2007 | Scientific literature |
| Alcohol use disorders                 | Barros MB de A, Botega JN, Dalgalarondo P, Marin-León L, de Oliveira HB. Prevalence of alcohol abuse and associated factors in a population-based study. . 2007; 41(4): 502-9.                                                                                                       |         | 2003      | Scientific literature |
| Cocaine use disorders                 | Ribeiro M, Dunn J, Sesso R, Dias AC, Laranjeira R. Causes of death among crack cocaine users. . 2006; 28(3): 196-202.                                                                                                                                                                |         | 1992-1999 | Scientific literature |

|                           |                                                                                                                                                                                                                                                                                                                                                                                                                                                                                                                                                                                                                                                                                                                                                                                                    |         |           |                       |
|---------------------------|----------------------------------------------------------------------------------------------------------------------------------------------------------------------------------------------------------------------------------------------------------------------------------------------------------------------------------------------------------------------------------------------------------------------------------------------------------------------------------------------------------------------------------------------------------------------------------------------------------------------------------------------------------------------------------------------------------------------------------------------------------------------------------------------------|---------|-----------|-----------------------|
| Cocaine use disorders     | Galduróz JCF, Noto AR, Nappo SA, Carlini EA. Household survey on drug abuse in Brazil: study involving the 107 major cities of the country @2001. . 2005; 30(3): 545-56.                                                                                                                                                                                                                                                                                                                                                                                                                                                                                                                                                                                                                           |         | 2001      | Scientific literature |
| Cocaine use disorders     | Dias AC, Ribeiro M, Dunn J, Sesso R, Laranjeira R. Follow-up study of crack cocaine users: situation of the patients after 2, 5, and 12 years. . 2008; 29(3): 71-9.                                                                                                                                                                                                                                                                                                                                                                                                                                                                                                                                                                                                                                |         | 1995-2006 | Scientific literature |
| Cocaine use disorders     | Ipsos, National Institute of Public Policy for Alcohol and Other Drugs (INPAD) (Brazil), University of São Paulo. Brazil National Alcohol and Drugs Survey 2011-2012.                                                                                                                                                                                                                                                                                                                                                                                                                                                                                                                                                                                                                              | Country | 2011-2012 | Survey                |
| Cocaine use disorders     | Brazil Household Survey About the Use of Psychotropic Drugs 2005                                                                                                                                                                                                                                                                                                                                                                                                                                                                                                                                                                                                                                                                                                                                   | Country | 2005      | Survey                |
| Cocaine use disorders     | Bitancourt T, Tissot MCRG, Fidalgo TM, Galduróz JCF, da Silveira Filho DX. Factors associated with illicit drugs lifetime and frequent/heavy use among students results from a population survey. . 2016; 237: 2908.                                                                                                                                                                                                                                                                                                                                                                                                                                                                                                                                                                               |         | 2011-2012 | Scientific literature |
| Cocaine use disorders     | Madrugá CS, Laranjeira R, Caetano R, Pinsky I, Zaleski M, Ferri CP. Use of licit and illicit substances among adolescents in Brazil—a national survey. . 2012; 37(10): 11718.                                                                                                                                                                                                                                                                                                                                                                                                                                                                                                                                                                                                                      |         | 2009      | Scientific literature |
| Cocaine use disorders     | Galduróz JCF, Noto AR, Nappo SA, Carlini EA. Household survey on drug abuse in Brazil: study involving the 107 major cities of the country @2001. . 2005; 30(3): 545-56.                                                                                                                                                                                                                                                                                                                                                                                                                                                                                                                                                                                                                           |         | 2009      | Scientific literature |
| Amphetamine use disorders | Galduróz JCF, Noto AR, Nappo SA, Carlini EA. Trends in drug use among students in Brazil: analysis of four surveys in 1987, 1989, 1993 and 1997. . 2004; 37(4): 523-31.                                                                                                                                                                                                                                                                                                                                                                                                                                                                                                                                                                                                                            |         | 2001      | Scientific literature |
| Amphetamine use disorders | Galduróz JCF, Noto AR, Nappo SA, Carlini EA. Trends in drug use among students in Brazil: analysis of four surveys in 1987, 1989, 1993 and 1997. . 2004; 37(4): 523-31.                                                                                                                                                                                                                                                                                                                                                                                                                                                                                                                                                                                                                            |         | 1993-1997 | Scientific literature |
| Amphetamine use disorders | Bitancourt T, Tissot MCRG, Fidalgo TM, Galduróz JCF, da Silveira Filho DX. Factors associated with illicit drugs lifetime and frequent/heavy use among students results from a population survey. . 2016; 237: 2908.                                                                                                                                                                                                                                                                                                                                                                                                                                                                                                                                                                               |         | 2009      | Scientific literature |
| Amphetamine use disorders | Inter-American Drug Abuse Control Commission (CICAD), Organization of American States (OAS), National Commission for Development and Life without Drugs (DEVIDA) (Peru), National Council for Narcotics Control (CONACE) (Chile), National Council for the Control of Narcotic and Psychotropic Substances (CONSEP), National Drug Board (JND), Secretariat for Programming Drug Abuse Prevention and the Fight against Drug Trafficking (SEDRONAR), The National Council for the Fight against Illicit Drug Trafficking (CONALTID), United Nations Office on Drugs and Crime (UNODC). Youth and Drugs in South American Countries: A Public Policy Challenge. Washington, D.C., United States: Inter-American Drug Abuse Control Commission (CICAD), Organization of American States (OAS), 2006. | Country | 2006-2007 | Report                |
| Amphetamine use disorders | Ipsos, National Institute of Public Policy for Alcohol and Other Drugs (INPAD) (Brazil), University of São Paulo. Brazil National Alcohol and Drugs Survey 2011-2012.                                                                                                                                                                                                                                                                                                                                                                                                                                                                                                                                                                                                                              | Country | 2011-2012 | Survey                |
| Cannabis use disorders    | Bitancourt T, Tissot MCRG, Fidalgo TM, Galduróz JCF, da Silveira Filho DX. Factors associated with illicit drugs lifetime and frequent/heavy use among students results from a population survey. . 2016; 237: 2908.                                                                                                                                                                                                                                                                                                                                                                                                                                                                                                                                                                               |         | 2009      | Scientific literature |
| Cannabis use disorders    | Brazil Household Survey About the Use of Psychotropic Drugs 2005                                                                                                                                                                                                                                                                                                                                                                                                                                                                                                                                                                                                                                                                                                                                   | Country | 2005      | Survey                |
| Cannabis use disorders    | Inter-American Drug Abuse Control Commission (CICAD), Organization of American States (OAS), National Commission for Development and Life without Drugs (DEVIDA) (Peru), National Council for Narcotics Control (CONACE) (Chile), National Council for the Control of Narcotic and Psychotropic Substances (CONSEP), National Drug Board (JND), Secretariat for Programming Drug Abuse Prevention and the Fight against Drug Trafficking (SEDRONAR), The National Council for the Fight against Illicit Drug Trafficking (CONALTID), United Nations Office on Drugs and Crime (UNODC). Youth and Drugs in South American Countries: A Public Policy Challenge. Washington, D.C., United States: Inter-American Drug Abuse Control Commission (CICAD), Organization of American States (OAS), 2006. | Country | 2005      | Report                |
| Cannabis use disorders    | cannabis use in Brazil: data from the I Brazilian National Alcohol Survey (BNAS) . . 2010; 35(3): 190-3.                                                                                                                                                                                                                                                                                                                                                                                                                                                                                                                                                                                                                                                                                           |         | 2005-2006 | Scientific literature |
| Cannabis use disorders    | on the Epidemiology of Mental Disorders. Cambridge, United Kingdom: Cambridge University Press, 2008.                                                                                                                                                                                                                                                                                                                                                                                                                                                                                                                                                                                                                                                                                              | Country | 2004-2006 | Report                |
| Cannabis use disorders    | Madrugá CS, Laranjeira R, Caetano R, Pinsky I, Zaleski M, Ferri CP. Use of licit and illicit substances among adolescents in Brazil—a national survey. . 2012; 37(10): 11718.                                                                                                                                                                                                                                                                                                                                                                                                                                                                                                                                                                                                                      |         | 2009      | Scientific literature |
| Cannabis use disorders    | Brazilian Institute of Geography and Statistics (IBGE), Ministry of Health (Brazil), Ministry of Planning, Budget, and Management (Brazil). Brazil National Health Survey 2013. Rio de Janeiro, Brazil: Brazilian Institute of Geography and Statistics (IBGE).                                                                                                                                                                                                                                                                                                                                                                                                                                                                                                                                    | Country | 2013      | Survey                |
| Major depressive disorder | Anselmi L, Fleitlich-Bilyk B, Menezes AMB, Araujo CL, Rohde LA. Prevalence of psychiatric disorders in a Brazilian birth cohort of 11-year-olds. . 2010; 45(1): 135-42.                                                                                                                                                                                                                                                                                                                                                                                                                                                                                                                                                                                                                            |         | 2004-2006 | Scientific literature |
| Major depressive disorder | Andrade LH, Wang Y-P, Andreoni S, Silveira CM, Alexandrino-Silva C, Siu ER, Nishimura R, Anthony JC, Gattaz WF, Kessler RC, Viana MC. Mental disorders in megacities: findings from the São Paulo megacity mental health survey, Brazil. . 2012; 7(2): e31879.                                                                                                                                                                                                                                                                                                                                                                                                                                                                                                                                     |         | 2005-2007 | Scientific literature |
| Major depressive disorder | Institute for Health Metrics and Evaluation (IHME). IHME Cause-Specific Mortality Rates for Suicide Attributable to Major Depressive Disorder.                                                                                                                                                                                                                                                                                                                                                                                                                                                                                                                                                                                                                                                     | Global  | 1990-2015 | Modeled data          |
| Major depressive disorder | Costa E, Barreto SM, Uchoa E, Fermo JOA, Lima-Costa MF, Prince M. Prevalence of International Classification of Diseases, 10th Revision Common Mental Disorders in the Elderly in a Brazilian Community: The Bambuí Health Ageing Study. . 2007; 15(1): 17-27.                                                                                                                                                                                                                                                                                                                                                                                                                                                                                                                                     |         | 1997-2001 | Scientific literature |
| Major depressive disorder | Petresco S, Anselmi L, Santos IS, Barros AJ, Fleitlich-Bilyk B, Barros FC, Matijasevich A. Prevalence and comorbidity of psychiatric disorders among 6-year-old children: 2004 Pelotas Birth Cohort. . 2014; 49(6): 97583.                                                                                                                                                                                                                                                                                                                                                                                                                                                                                                                                                                         |         | 2010      | Scientific literature |
| Major depressive disorder | RA, de Mello MF, Prince M, Ferri CP, Coutinho ES, Andreoli SB. The impact of epidemic violence on the prevalence of psychiatric disorders in Sao Paulo and Rio de Janeiro, Brazil. . 2013; 8(5): e63545.                                                                                                                                                                                                                                                                                                                                                                                                                                                                                                                                                                                           |         | 2007-2008 | Scientific literature |
| Major depressive disorder | Bahls S. Epidemiology of depressive symptoms in adolescents of a public school in Curitiba, Brazil. . 2002; 632.                                                                                                                                                                                                                                                                                                                                                                                                                                                                                                                                                                                                                                                                                   |         | 1999-2001 | Scientific literature |
| Major depressive disorder | da Silva SA, Scazufca M, Menezes PR. Population impact of depression on functional disability in elderly: results from São Paulo Ageing & Health Study (ESPAH) . . 2013; 263(2): 1538.                                                                                                                                                                                                                                                                                                                                                                                                                                                                                                                                                                                                             |         | 2003-2005 | Scientific literature |
| Major depressive disorder | Barcelos-Ferreira R, Nakano EY, Steffens DC, Bottino CM. Quality of life and physical activity associated to lower prevalence of depression in community-dwelling elderly subjects from Sao Paulo. . 2013; 150(2): 61622.                                                                                                                                                                                                                                                                                                                                                                                                                                                                                                                                                                          |         | 2002-2004 | Scientific literature |
| Major depressive disorder | Brazil World Health Survey 2003                                                                                                                                                                                                                                                                                                                                                                                                                                                                                                                                                                                                                                                                                                                                                                    | Country | 2003      | Survey                |
| Major depressive disorder | Coelho CL, Crippa JA, Santos JL, Pinsky I, Zaleski M, Caetano R, Laranjeira R. Higher prevalence of major depressive symptoms in Brazilians aged 14 and older. . 2013; 35(2): 1429.                                                                                                                                                                                                                                                                                                                                                                                                                                                                                                                                                                                                                |         | 2005-2006 | Scientific literature |
| Major depressive disorder | Vorcaro GM, Lima-Costa MF, Barreto SM, Uchoa E. Unexpected high prevalence of 1-month depression in a small Brazilian community: the Bambuí Study. . 2001; 10(4): 25783.                                                                                                                                                                                                                                                                                                                                                                                                                                                                                                                                                                                                                           |         | 1996-1997 | Scientific literature |
| Major depressive disorder | Lopez MRA, Ribeiro JP, Ores LC, Jansen K, Souza LDM, Pinheiro RT, Da Silva RA. Depressão e qualidade de vida em jovens de 18 a 24 anos no sul do Brasil. . 2011; 1028.                                                                                                                                                                                                                                                                                                                                                                                                                                                                                                                                                                                                                             |         | 2007-2008 | Scientific literature |
| Major depressive disorder | Chiavegatto Filho AD, Kawachi I, Wang YP, Viana MC, Andrade LH. Does income inequality get under the skin? A multilevel analysis of depression, anxiety and mental disorders in Sao Paulo, Brazil. . 2013; 96692.                                                                                                                                                                                                                                                                                                                                                                                                                                                                                                                                                                                  |         | 2005-2007 | Scientific literature |
| Major depressive disorder | Andrade L, Walters EE, Gentil V, Laurenti R. Prevalence of ICD-10 mental disorders in a catchment area in the city of São Paulo, Brazil. . 2002; 37(7): 316-25.                                                                                                                                                                                                                                                                                                                                                                                                                                                                                                                                                                                                                                    |         | 1994-1996 | Scientific literature |
| Major depressive disorder | Kessler RC, Birnbaum HG, Shahly V, Bromet E, Hwang I, McLaughlin KA, Sampson N, Andrade LH, de Girolamo G, Demeytneare K, Haro JM, Karam AN, Kostyuchenko S, Kovess Y, Lara C, Levinson D, Matschinger H, Nakane Y, Browne MO, Ormel J, Posada-Villa J, Sagor R, Stein DJ. Age differences in the prevalence and co-morbidity of DSM-IV major depressive episodes: results from the WHO World Mental Health Survey Initiative. . 2010; 27(4): 35184.                                                                                                                                                                                                                                                                                                                                               |         | 2004-2007 | Scientific literature |
| Major depressive disorder | Salum GA, Gadelha A, Pan PM, Moriyma TS, Graeff-Martins AS, Tamanaha AC, Alvarenga P, Valle Krieger F, Fleitlich-Bilyk B, Jackowski A, Sato JR, Brietzke E, Polanczyk GV, Brentani H, de Jesus Mari J, Do Rosário MC, Manfro GG, Bressan RA, Mercadante MT, Miguel EC, Rohde LA. High risk cohort study for psychiatric disorders in childhood: rationale, design, methods and preliminary results. . 2015; 24(1): 5823.                                                                                                                                                                                                                                                                                                                                                                           |         | 2012-2014 | Scientific literature |
| Major depressive disorder | Fleitlich-Bilyk B, Goodman R. Prevalence of child and adolescent psychiatric disorders in southeast Brazil. . 2004; 43(6): 727-34.                                                                                                                                                                                                                                                                                                                                                                                                                                                                                                                                                                                                                                                                 |         | 2000-2001 | Scientific literature |
| Dysthymia                 | Barcelos-Ferreira R, Nakano EY, Steffens DC, Bottino CM. Quality of life and physical activity associated to lower prevalence of depression in community-dwelling elderly subjects from Sao Paulo. . 2013; 150(2): 61622.                                                                                                                                                                                                                                                                                                                                                                                                                                                                                                                                                                          |         | 2002-2004 | Scientific literature |
| Dysthymia                 | Andrade L, Walters EE, Gentil V, Laurenti R. Prevalence of ICD-10 mental disorders in a catchment area in the city of São Paulo, Brazil. . 2002; 37(7): 316-25.                                                                                                                                                                                                                                                                                                                                                                                                                                                                                                                                                                                                                                    |         | 1994-1996 | Scientific literature |
| Dysthymia                 | Costa E, Barreto SM, Uchoa E, Fermo JOA, Lima-Costa MF, Prince M. Prevalence of International Classification of Diseases, 10th Revision Common Mental Disorders in the Elderly in a Brazilian Community: The Bambuí Health Ageing Study. . 2007; 15(1): 17-27.                                                                                                                                                                                                                                                                                                                                                                                                                                                                                                                                     |         | 1997-2001 | Scientific literature |
| Bipolar disorder          | Merikangas KR, Jin R, He J-P, Kessler RC, Lee S, Sampson NA, Viana MC, Andrade LH, Hu C, Karam EG, Ladea M, Medina-Mora ME, Ono Y, Posada-Villa J, Sagor R, Wells JE, Zarkov Z. Prevalence and correlates of bipolar spectrum disorder in the World Mental Health Survey Initiative. . 2011; 68(3): 241-51.                                                                                                                                                                                                                                                                                                                                                                                                                                                                                        |         | 2005-2007 | Scientific literature |

|                                                         |                                                                                                                                                                                                                                                                                                                                                                                                                           |           |           |                       |
|---------------------------------------------------------|---------------------------------------------------------------------------------------------------------------------------------------------------------------------------------------------------------------------------------------------------------------------------------------------------------------------------------------------------------------------------------------------------------------------------|-----------|-----------|-----------------------|
| Bipolar disorder                                        | Salum GA, Gadelha A, Pan PM, Moriyama TS, Graeff-Martins AS, Tamanaha AC, Alvarenga P, Valle Krieger F, Fleitlich-Bilyk B, Jackowski A, Sato JR, Brietzke E, Polanczyk GV, Brentani H, de Jesus Mari J, Do Rosário MC, Manfro GG, Bressan RA, Mercadante MT, Miguel EC, Rohde LA. High risk cohort study for psychiatric disorders in childhood: rationale, design, methods and preliminary results. . 2015; 24(1): 5873. |           | 2012-2014 | Scientific literature |
| Bipolar disorder                                        | Andrade L, Walters EE, Gentil V, Laurenti R. Prevalence of ICD-10 mental disorders in a catchment area in the city of São Paulo, Brazil. . 2002; 37(7): 316-25.                                                                                                                                                                                                                                                           |           | 1994-1996 | Scientific literature |
| Anxiety disorders                                       | Anselmi L, Fleitlich-Bilyk B, Menezes AMB, Araújo CL, Rohde LA. Prevalence of psychiatric disorders in a Brazilian birth cohort of 11-year-olds. . 2010; 45(1): 135-42.                                                                                                                                                                                                                                                   |           | 2004-2005 | Scientific literature |
| Anxiety disorders                                       | Jaen-Varas D, Mari J de J, Coutinho E da S, Andreoli SB, Quintana MI, de Mello MF, Bressan RA, Ribeiro WS. A cross-sectional study to compare levels of psychiatric morbidity between young people and adults exposed to violence in a large urban center. . 2016; 16: 134.                                                                                                                                               |           | 2007-2008 | Scientific literature |
| Anxiety disorders                                       | Silva RA da. Anxiety disorders in young people: a population-based study. . 2013; 35(4): 347-52.                                                                                                                                                                                                                                                                                                                          |           | 2007-2009 | Scientific literature |
| Anxiety disorders                                       | Petresco S, Anselmi L, Santos IS, Barros AJ, Fleitlich-Bilyk B, Barros FC, Matijasevich A. Prevalence and comorbidity of psychiatric disorders among 6-year-old children: 2004 Pelotas Birth Cohort. . 2014; 49(6): 97583.                                                                                                                                                                                                |           | 2010      | Scientific literature |
| Anxiety disorders                                       | Andrade L, Walters EE, Gentil V, Laurenti R. Prevalence of ICD-10 mental disorders in a catchment area in the city of São Paulo, Brazil. . 2002; 37(7): 316-25.                                                                                                                                                                                                                                                           |           | 1994-1996 | Scientific literature |
| Anxiety disorders                                       | Fleitlich-Bilyk B, Goodman R. Prevalence of child and adolescent psychiatric disorders in southeast Brazil. . 2004; 43(6): 727-34.                                                                                                                                                                                                                                                                                        |           | 2000-2001 | Scientific literature |
| Anxiety disorders                                       | on the Epidemiology of Mental Disorders. Cambridge, United Kingdom: Cambridge University Press, 2008.                                                                                                                                                                                                                                                                                                                     | Country   | 2005-2007 | Report                |
| Bulimia nervosa                                         | Kessler RC, Berglund PA, Chiu WT, Deltz AC, Hudson JI, Shahly V, Aguilar-Gaxiola S, Alonso J, Angermeyer MC, Benjet C, Bruffaerts R, de Girolamo G, de Graaf R, Haro JM, Kovess-Masfety V, O'Neill S, Posada-Villa J, Sasu C, Scott K, Viana MC, Xavier M. The prevalence and correlates of binge eating disorder in the WHO World Mental Health Surveys. . 2013; 73(9): 904#14.                                          |           | 2005-2007 | Scientific literature |
| Bulimia nervosa                                         | Andrade L, Walters EE, Gentil V, Laurenti R. Prevalence of ICD-10 mental disorders in a catchment area in the city of São Paulo, Brazil. . 2002; 37(7): 316-25.                                                                                                                                                                                                                                                           |           | 1994-1996 | Scientific literature |
| Autism                                                  | Salum GA, Gadelha A, Pan PM, Moriyama TS, Graeff-Martins AS, Tamanaha AC, Alvarenga P, Valle Krieger F, Fleitlich-Bilyk B, Jackowski A, Sato JR, Brietzke E, Polanczyk GV, Brentani H, de Jesus Mari J, Do Rosário MC, Manfro GG, Bressan RA, Mercadante MT, Miguel EC, Rohde LA. High risk cohort study for psychiatric disorders in childhood: rationale, design, methods and preliminary results. . 2015; 24(1): 5873. |           | 2012-2014 | Scientific literature |
| Autism                                                  | Institute for Health Metrics and Evaluation (IHME). IHME DisMod Autism Excess Mortality Petresco S, Anselmi L, Santos IS, Barros AJ, Fleitlich-Bilyk B, Barros FC, Matijasevich A. Prevalence and comorbidity of psychiatric disorders among 6-year-old children: 2004 Pelotas Birth Cohort. . 2014; 49(6): 97583.                                                                                                        | Global    | 1990-2016 | Modeled data          |
| Autism                                                  | Petresco S, Anselmi L, Santos IS, Barros AJ, Fleitlich-Bilyk B, Barros FC, Matijasevich A. Prevalence and comorbidity of psychiatric disorders among 6-year-old children: 2004 Pelotas Birth Cohort. . 2014; 49(6): 97583.                                                                                                                                                                                                |           | 2010      | Scientific literature |
| Asperger syndrome and other autistic spectrum disorders | Salum GA, Gadelha A, Pan PM, Moriyama TS, Graeff-Martins AS, Tamanaha AC, Alvarenga P, Valle Krieger F, Fleitlich-Bilyk B, Jackowski A, Sato JR, Brietzke E, Polanczyk GV, Brentani H, de Jesus Mari J, Do Rosário MC, Manfro GG, Bressan RA, Mercadante MT, Miguel EC, Rohde LA. High risk cohort study for psychiatric disorders in childhood: rationale, design, methods and preliminary results. . 2015; 24(1): 5873. |           | 2012-2014 | Scientific literature |
| Attention-deficit/hyperactivity disorder                | Goodman R, Neves dos Santos D, Robatto Nunes AP, Pereira de Miranda D, Fleitlich-Bilyk B, Almeida Filho N. The Ilha de Maré study: a survey of child mental health problems in a predominantly African-Brazilian rural community. . 2005; 40(1): 11-7.                                                                                                                                                                    |           | 2003      | Scientific literature |
| Attention-deficit/hyperactivity disorder                | Petresco S, Anselmi L, Santos IS, Barros AJ, Fleitlich-Bilyk B, Barros FC, Matijasevich A. Prevalence and comorbidity of psychiatric disorders among 6-year-old children: 2004 Pelotas Birth Cohort. . 2014; 49(6): 97583.                                                                                                                                                                                                |           | 2010      | Scientific literature |
| Attention-deficit/hyperactivity disorder                | Salum GA, Gadelha A, Pan PM, Moriyama TS, Graeff-Martins AS, Tamanaha AC, Alvarenga P, Valle Krieger F, Fleitlich-Bilyk B, Jackowski A, Sato JR, Brietzke E, Polanczyk GV, Brentani H, de Jesus Mari J, Do Rosário MC, Manfro GG, Bressan RA, Mercadante MT, Miguel EC, Rohde LA. High risk cohort study for psychiatric disorders in childhood: rationale, design, methods and preliminary results. . 2015; 24(1): 5873. |           | 2012-2014 | Scientific literature |
| Attention-deficit/hyperactivity disorder                | Rohde LA, Biederman J, Busnello EA, Zimmermann H, Schmitz M, Martins S, Tramontina S. ADHD in a School Sample of Brazilian Adolescents: A Study of Prevalence, Comorbid Conditions, and Impairments. . 1999; 38(6): 716-22.                                                                                                                                                                                               |           | 1997      | Scientific literature |
| Attention-deficit/hyperactivity disorder                | Fleitlich-Bilyk B, Goodman R. Prevalence of child and adolescent psychiatric disorders in southeast Brazil. . 2004; 43(6): 727-34.                                                                                                                                                                                                                                                                                        |           | 2002      | Scientific literature |
| Attention-deficit/hyperactivity disorder                | Matte B, Anselmi L, Salum GA, Kieling C, Gonçalves H, Menezes A, Grevet EH, Rohde LA. ADHD in DSM-5: A field trial in a large, representative sample of 18- to 19-year-old adults. . 2015; 45(2): 361#3.                                                                                                                                                                                                                  |           | 2011-2012 | Scientific literature |
| Attention-deficit/hyperactivity disorder                | Arruda MA, Querido CN, Bigal ME, Polanczyk GV. ADHD and mental health status in Brazilian school-age children. . 2015; 19(1): 11#.                                                                                                                                                                                                                                                                                        |           | 2009      | Scientific literature |
| Attention-deficit/hyperactivity disorder                | Anselmi L, Fleitlich-Bilyk B, Menezes AMB, Araújo CL, Rohde LA. Prevalence of psychiatric disorders in a Brazilian birth cohort of 11-year-olds. . 2010; 45(1): 135-42.                                                                                                                                                                                                                                                   |           | 2004-2006 | Scientific literature |
| Conduct disorder                                        | Goodman R, Neves dos Santos D, Robatto Nunes AP, Pereira de Miranda D, Fleitlich-Bilyk B, Almeida Filho N. The Ilha de Maré study: a survey of child mental health problems in a predominantly African-Brazilian rural community. . 2005; 40(1): 11-7.                                                                                                                                                                    |           | 2001      | Scientific literature |
| Conduct disorder                                        | Anselmi L, Fleitlich-Bilyk B, Menezes AMB, Araújo CL, Rohde LA. Prevalence of psychiatric disorders in a Brazilian birth cohort of 11-year-olds. . 2010; 45(1): 135-42.                                                                                                                                                                                                                                                   |           | 2004-2006 | Scientific literature |
| Conduct disorder                                        | Petresco S, Anselmi L, Santos IS, Barros AJ, Fleitlich-Bilyk B, Barros FC, Matijasevich A. Prevalence and comorbidity of psychiatric disorders among 6-year-old children: 2004 Pelotas Birth Cohort. . 2014; 49(6): 97583.                                                                                                                                                                                                |           | 2010      | Scientific literature |
| Conduct disorder                                        | Salum GA, Gadelha A, Pan PM, Moriyama TS, Graeff-Martins AS, Tamanaha AC, Alvarenga P, Valle Krieger F, Fleitlich-Bilyk B, Jackowski A, Sato JR, Brietzke E, Polanczyk GV, Brentani H, de Jesus Mari J, Do Rosário MC, Manfro GG, Bressan RA, Mercadante MT, Miguel EC, Rohde LA. High risk cohort study for psychiatric disorders in childhood: rationale, design, methods and preliminary results. . 2015; 24(1): 5873. |           | 2012-2014 | Scientific literature |
| Conduct disorder                                        | Fleitlich-Bilyk B, Goodman R. Prevalence of child and adolescent psychiatric disorders in southeast Brazil. . 2004; 43(6): 727-34.                                                                                                                                                                                                                                                                                        |           | 2002      | Scientific literature |
| Idiopathic developmental Intellectual disability        | Stein Z, Belmont L, Durkin M. Mild mental retardation and severe mental retardation compared: experiences in eight less developed countries. . 1987; 44: 89-96.                                                                                                                                                                                                                                                           |           | 1987      | Scientific literature |
| Diabetes mellitus                                       | Muniz EC, Rocha RM, Reis ML, Santos VL, Grossi SA. Neuropathic and ischemic changes of the foot in Brazilian patients with diabetes. . 2003; 49(8): 60-70.                                                                                                                                                                                                                                                                |           | 2000-2002 | Scientific literature |
| Diabetes mellitus                                       | Brazilian Institute of Geography and Statistics (IBGE), Ministry of Health (Brazil), Ministry of Planning, Budget, and Management (Brazil). Brazil National Health Survey 2013. Rio de Janeiro, Brazil: Brazilian Institute of Geography and Statistics (IBGE).                                                                                                                                                           | Country   | 2013      | Survey                |
| Diabetes mellitus                                       | Schaan BD, Harzheim E, Gus I. [Cardiac risk profile in diabetes mellitus and impaired fasting glucose]. . 2004; 38(4): 529-36.                                                                                                                                                                                                                                                                                            |           | 1999-2000 | Scientific literature |
| Diabetes mellitus                                       | Freitas MPD, Loyola Filho AI de, Lima-Costa MF. Birth cohort differences in cardiovascular risk factors in a Brazilian population of older elderly: the Bambuí Cohort Study of Aging (1997 and 2008). . 2011; 54(9): 417.                                                                                                                                                                                                 |           | 1997-2008 | Scientific literature |
| Diabetes mellitus                                       | Lima-Costa MF, Mambrini JV, Leite ML, Peikoto SV, Firmo JO, Loyola Filho AI, Gouveia MH, Leal TP, Pereira AC, Macinko J, Tarazona-Santos E. Socioeconomic Position, But Not African Genomic Ancestry, Is Associated With Blood Pressure in the Bambuí-Epigen (Brazil) Cohort Study of Aging. . 2016; 67(2): 349-55.                                                                                                       |           | 1997      | Scientific literature |
| Diabetes mellitus                                       | Rigo JC, Vieira JL, Dalacorte RR, Reichert CL. Prevalence of metabolic syndrome in an elderly community: comparison between three diagnostic methods. . 2009; 93(2): 85-91.                                                                                                                                                                                                                                               |           | 2005-2006 | Scientific literature |
| Diabetes mellitus                                       | Vieira-Santos IC, Souza WV, Carvalho EF, Medeiros MC, Nóbrega MG, Lima PM. Prevalence of diabetic foot and associated factors in the family health units of the city of Recife, Pernambuco State, Brazil, in 2005. . 2008; 24(12): 2861-70.                                                                                                                                                                               |           | 2006      | Scientific literature |
| Diabetes mellitus                                       | Arieta CEL, de Oliveira DF, Lupinacci AP de C, Novaes P, Paccolla M, Jose NK, Limburg H. Cataract remains an important cause of blindness in Campinas, Brazil. . 2009; 16(1): 58-63.                                                                                                                                                                                                                                      |           | 2003      | Scientific literature |
| Diabetes mellitus                                       | Araújo Filho A, Salomão SR, Berezovsky A, Cinoto RW, Moraes PHA, Santos FRG, Belfort R Jr. Prevalence of visual impairment, blindness, ocular disorders and cataract surgery outcomes in low-income elderly from a metropolitan region of São Paulo-Brazil. . 2008; 71(2): 246-53.                                                                                                                                        |           | 2002      | Scientific literature |
| Diabetes mellitus                                       | Lessa I, Magalhães L, Araújo MJ, de Almeida Filho N, Aquino E, Oliveira MM. Arterial hypertension in the adult population of Salvador (BA)-Brazil. . 2006; 87(6): 747-56.                                                                                                                                                                                                                                                 |           | 1999-2000 | Scientific literature |
| Diabetes mellitus                                       | International Centre for Eye Health (ICHE). Brazil - Campinas Rapid Assessment of Avoidable Blindness 2004. Grootebroek, Netherlands: RAAB Repository.                                                                                                                                                                                                                                                                    | São Paulo | 2003      | Survey                |
| Acute glomerulonephritis                                | Health Institute (São Paulo, Brazil), State University of Campinas, São Paulo Municipal Health Department, São Paulo State University, University of São Paulo, Brazil - São Paulo Health Survey 2008-2009.                                                                                                                                                                                                               | São Paulo | 2002-2008 | Survey                |
| Acute glomerulonephritis                                | Ministry of Health (Brazil). Brazil Hospital Information System 1998-2002.                                                                                                                                                                                                                                                                                                                                                |           | 1998-2002 | Administrative record |
| Acute glomerulonephritis                                | Ministry of Health (Brazil). Brazil Hospital Information System 2003-2007.                                                                                                                                                                                                                                                                                                                                                |           | 2003-2007 | Administrative record |



|                                                     |                                                                                                                                                                                                                                                                                                                                                                                                                                                            |           |           |                       |
|-----------------------------------------------------|------------------------------------------------------------------------------------------------------------------------------------------------------------------------------------------------------------------------------------------------------------------------------------------------------------------------------------------------------------------------------------------------------------------------------------------------------------|-----------|-----------|-----------------------|
| Acute glomerulonephritis                            | Brazilian Institute of Geography and Statistics (IBGE), Ministry of Health (Brazil), Ministry of Planning, Budget, and Management (Brazil), Brazil National Health Survey 2013. Rio de Janeiro, Brazil: Brazilian Institute of Geography and Statistics (IBGE).                                                                                                                                                                                            | Country   | 2013-2014 | Survey                |
| Acute glomerulonephritis                            | Brazil World Health Survey 2003                                                                                                                                                                                                                                                                                                                                                                                                                            | Country   | 2002-2003 | Survey                |
| Acute glomerulonephritis                            | Ministry of Health (Brazil). Brazil Hospital Information System 1997. Rio de Janeiro, Brazil: Ministry of Health (Brazil).                                                                                                                                                                                                                                                                                                                                 | Country   | 1993-1997 | Administrative record |
| Acute glomerulonephritis                            | Ministry of Health (Brazil). Brazil Hospital Information System 2013-2014.                                                                                                                                                                                                                                                                                                                                                                                 |           | 2013-2017 | Administrative record |
| Acute glomerulonephritis                            | Ministry of Health (Brazil). Brazil Hospital Information System 2008-2012.                                                                                                                                                                                                                                                                                                                                                                                 |           | 2008-2012 | Administrative record |
| Chronic kidney disease                              | Institute for Health Metrics and Evaluation (IHME). IHME DisMod Stage IV Chronic Kidney Disease Remission Estimates.                                                                                                                                                                                                                                                                                                                                       | Global    | 1990-2016 | Modeled data          |
| Chronic kidney disease                              | Brazilian Society of Nephrology. Brazilian Society of Nephrology Dialysis Census 2009. São Paulo, Brazil: Brazilian Society of Nephrology.                                                                                                                                                                                                                                                                                                                 | Country   | 2009      | Disease registry      |
| Chronic kidney disease                              | Brazilian Society of Nephrology. Brazilian Society of Nephrology Dialysis Census 2011. São Paulo, Brazil: Brazilian Society of Nephrology.                                                                                                                                                                                                                                                                                                                 | Country   | 2011      | Disease registry      |
| Chronic kidney disease                              | Brazilian Society of Nephrology. Brazilian Society of Nephrology Dialysis Census 2012. São Paulo, Brazil: Brazilian Society of Nephrology.                                                                                                                                                                                                                                                                                                                 | Country   | 2012      | Disease registry      |
| Chronic kidney disease                              | Brazilian Society of Nephrology. Brazilian Society of Nephrology Dialysis Census 2013. São Paulo, Brazil: Brazilian Society of Nephrology.                                                                                                                                                                                                                                                                                                                 | Country   | 2013      | Disease registry      |
| Chronic kidney disease                              | De Moura L, Prestes IV, Duncan BB, Thome FS, Schmidt MI. Dialysis for end stage renal disease financed through the Brazilian National Health System, 2000 to 2012. . 2014; 111.                                                                                                                                                                                                                                                                            |           | 2001-2003 | Scientific literature |
| Chronic kidney disease                              | Vidgal PG, Ribeiro AL, Lotufo PA, Mill JG. Chronic kidney disease among adult participants of the ELSA-Brasil cohort: association with race and socioeconomic position. . 2016; 70(4): 380-9.                                                                                                                                                                                                                                                              |           | 2008-2010 | Scientific literature |
| Chronic kidney disease                              | Cordeiro AC, Carrero JJ, Qureshi AR, Cunha RF da, Lindholm B, Castro I de, Noronha IL. Study of the incidence of dialysis in Sao Paulo, the largest Brazilian city. . 2013; 68(6): 7608.                                                                                                                                                                                                                                                                   |           | 2007-2011 | Scientific literature |
| Chronic kidney disease                              | Brazilian Society of Nephrology. Brazilian Society of Nephrology Dialysis Census 2014. São Paulo, Brazil: Brazilian Society of Nephrology.                                                                                                                                                                                                                                                                                                                 | Country   | 2014      | Disease registry      |
| Chronic kidney disease                              | Prevalence of chronic renal disease in adults attended by the family health strategy. . 2016; 38(1): 22-30.                                                                                                                                                                                                                                                                                                                                                |           | 2011-2013 | Scientific literature |
| Chronic kidney disease                              | Institute for Health Metrics and Evaluation (IHME). IHME DisMod Stage III Chronic Kidney Disease Remission Estimates.                                                                                                                                                                                                                                                                                                                                      | Global    | 1990-2016 | Modeled data          |
| Chronic kidney disease                              | Brazilian Society of Nephrology. Brazilian Society of Nephrology Dialysis Census 2008. São Paulo, Brazil: Brazilian Society of Nephrology.                                                                                                                                                                                                                                                                                                                 | Country   | 2007      | Disease registry      |
| Chronic kidney disease                              | Cusumano AM, Gonzalez Bedat MC, Garcia-Garcia G, Maury Fernandez S, Lugon JR, Poblete Badal H, Elgueta Miranda S, Gomez R, Cerdas Calderon M, Almaguez Lopez M, Moscoso Tobar J, Leiva Merino R, Sanchez Polo J, Lou Meda R, Franco Acosta B, Ayala Ferrari R, Escudero E, Saavedra Lopez A, Mena Castro E, Milanés C, Carlini R, Duro Garcia V. Latin American Dialysis and Renal Transplant Registry: 2008 report (data 2006) . . 2010; 74 Suppl 1: S38. |           | 2006      | Scientific literature |
| Chronic kidney disease                              | Pecoits-Filho R, Rosa-Diez G, Gonzalez-Bedat M, Marinovich S, Fernandez S, Lugon J, Poblete-Badal H, Elgueta-Miranda S, Gomez R, Cerdas-Calderon M, Almaguez-Lopez M, Freire N, Leiva-Merino R, Rodriguez G, Luna-Guerra J, Bochicchio T, Garcia-Garcia G, Cano N, Iron N. Renal replacement therapy in CKD: an update from the Latin American Registry of Dialysis and Transplantation. . 2015; 37(1): 9E3.                                               |           | 2010      | Scientific literature |
| Chronic kidney disease                              | Institute for Health Metrics and Evaluation (IHME). IHME GBD End-stage Renal Disease DisMod Transplant Incidence Estimates.                                                                                                                                                                                                                                                                                                                                | Global    | 1990-2016 | Modeled data          |
| Chronic kidney disease                              | Cusumano AM, Di Gioia C, Hermida O, Lavorato C, Latin American Registry of Dialysis and Renal Transplantation. The Latin American Dialysis and Renal Transplantation Registry Annual Report 2002. . 2005; (97): S46B2.                                                                                                                                                                                                                                     |           | 2000-2001 | Scientific literature |
| Chronic kidney disease                              | Cusumano A, Garcia-Garcia G, Gonzalez-Bedat C. The Latin American Dialysis and Transplant Registry: report 2006. . 2009; 19(1 Suppl 1): S18 B.                                                                                                                                                                                                                                                                                                             |           | 2005      | Scientific literature |
| Chronic kidney disease                              | United States Renal Data System Annual Data Report 2015                                                                                                                                                                                                                                                                                                                                                                                                    | Country   | 2003-2013 | Disease registry      |
| Chronic kidney disease                              | Brazilian Society of Nephrology. Brazilian Society of Nephrology Dialysis Census 2007.                                                                                                                                                                                                                                                                                                                                                                     | Country   | 2006-2007 | Disease registry      |
| Chronic kidney disease                              | Brazilian Society of Nephrology. Brazilian Society of Nephrology Dialysis Census 2002. São Paulo, Brazil: Brazilian Society of Nephrology.                                                                                                                                                                                                                                                                                                                 | Country   | 2002      | Disease registry      |
| Chronic kidney disease                              | Brazilian Society of Nephrology. Brazilian Society of Nephrology Dialysis Census 2005. São Paulo, Brazil: Brazilian Society of Nephrology.                                                                                                                                                                                                                                                                                                                 | Country   | 2005      | Disease registry      |
| Chronic kidney disease                              | Brazilian Society of Nephrology. Brazilian Society of Nephrology Dialysis Census 2006. São Paulo, Brazil: Brazilian Society of Nephrology.                                                                                                                                                                                                                                                                                                                 | Country   | 2003-2006 | Disease registry      |
| Chronic kidney disease                              | Fernandez-Cean J, Gonzalez-Martinez F, Schwedt E, Mazzuchi N. Renal replacement therapy in Latin America. . 2000; 57(574): 55-59.                                                                                                                                                                                                                                                                                                                          |           | 1997      | Scientific literature |
| Chronic kidney disease                              | Cusumano A, Garcia-Garcia G, Di Gioia C, Hermida O, Lavorato C, Carreño CA, Torricio MP, Batista PB, Romão JE, Badal HP, Miranda SE, Gomez R, Calderon MC, Sanchez SH, Lopez MA, Moscoso J, Merino RL, Polo JV, Lopez A, Romero NJ, Garcia R, Acosta BV, Lopez AS, Delpin ES, Mena E, González C, Milanés CL, Acchiardo S. End-stage renal disease and its treatment in Latin America in the twenty-first century. . 2006; 28(8): 631-7.                   | Country   | 2004      | Scientific literature |
| Chronic kidney disease                              | Santiago-Delpin EA, García VD. Latin American Transplant Registry VIIIth Report: 1998. . 1999; 31(1-2): 214-6.                                                                                                                                                                                                                                                                                                                                             |           | 1995-1997 | Scientific literature |
| Chronic kidney disease                              | transplants in Brazil: report of the Brazilian Registry of Renal Transplantation. . 1990; 5(11): 956-61.                                                                                                                                                                                                                                                                                                                                                   |           | 1987-1989 | Scientific literature |
| Chronic kidney disease                              | Brazilian Society of Nephrology. Brazilian Society of Nephrology Dialysis Census 2000. São Paulo, Brazil: Brazilian Society of Nephrology.                                                                                                                                                                                                                                                                                                                 | Country   | 2000      | Disease registry      |
| Chronic kidney disease                              | Brazilian Society of Nephrology. Brazilian Society of Nephrology Dialysis Census 2001. São Paulo, Brazil: Brazilian Society of Nephrology.                                                                                                                                                                                                                                                                                                                 | Country   | 2001      | Disease registry      |
| Chronic kidney disease                              | Brazilian Society of Nephrology. Brazilian Society of Nephrology Dialysis Census 2004. São Paulo, Brazil: Brazilian Society of Nephrology.                                                                                                                                                                                                                                                                                                                 | Country   | 1999-2004 | Disease registry      |
| Chronic kidney disease                              | Brazilian Society of Nephrology. Brazilian Society of Nephrology Dialysis Census 1999. São Paulo, Brazil: Brazilian Society of Nephrology.                                                                                                                                                                                                                                                                                                                 | Country   | 1999      | Disease registry      |
| Interstitial nephritis and urinary tract infections | Health Institute (São Paulo, Brazil), State University of Campinas, São Paulo Municipal Health Department, São Paulo State University, University of São Paulo. Brazil - São Paulo Health Survey 2008-2009.                                                                                                                                                                                                                                                | São Paulo | 2002-2008 | Survey                |
| Interstitial nephritis and urinary tract infections | Ministry of Health (Brazil). Brazil Hospital Information System 2013-2014.                                                                                                                                                                                                                                                                                                                                                                                 |           | 2008-2017 | Administrative record |
| Interstitial nephritis and urinary tract infections | Brazil World Health Survey 2003                                                                                                                                                                                                                                                                                                                                                                                                                            | Country   | 2002-2003 | Survey                |
| Interstitial nephritis and urinary tract infections | Ministry of Health (Brazil). Brazil Hospital Information System 1998-2002.                                                                                                                                                                                                                                                                                                                                                                                 |           | 1998-2007 | Administrative record |
| Interstitial nephritis and urinary tract infections | Ministry of Health (Brazil). Brazil Hospital Information System 2008-2012.                                                                                                                                                                                                                                                                                                                                                                                 |           | 2008-2017 | Administrative record |
| Interstitial nephritis and urinary tract infections | Ministry of Health (Brazil). Brazil Hospital Information System 2003-2007.                                                                                                                                                                                                                                                                                                                                                                                 |           | 1998-2007 | Administrative record |
| Interstitial nephritis and urinary tract infections | Brazilian Institute of Geography and Statistics (IBGE), Ministry of Health (Brazil), Ministry of Planning, Budget, and Management (Brazil), Brazil National Health Survey 2013. Rio de Janeiro, Brazil: Brazilian Institute of Geography and Statistics (IBGE).                                                                                                                                                                                            | Country   | 2013-2014 | Survey                |
| Interstitial nephritis and urinary tract infections | Ministry of Health (Brazil). Brazil Hospital Information System 1997. Rio de Janeiro, Brazil: Ministry of Health (Brazil).                                                                                                                                                                                                                                                                                                                                 | Country   | 1993-1997 | Administrative record |
| Urolithiasis                                        | Ministry of Health (Brazil). Brazil Hospital Information System 2013-2014.                                                                                                                                                                                                                                                                                                                                                                                 |           | 2013-2017 | Administrative record |
| Urolithiasis                                        | Ministry of Health (Brazil). Brazil Hospital Information System 2008-2012.                                                                                                                                                                                                                                                                                                                                                                                 |           | 2008-2012 | Administrative record |
| Urolithiasis                                        | Ministry of Health (Brazil). Brazil Hospital Information System 2003-2007.                                                                                                                                                                                                                                                                                                                                                                                 |           | 2003-2007 | Administrative record |
| Urolithiasis                                        | Brazil World Health Survey 2003                                                                                                                                                                                                                                                                                                                                                                                                                            | Country   | 2002-2003 | Survey                |
| Urolithiasis                                        | Ministry of Health (Brazil). Brazil Hospital Information System 1997. Rio de Janeiro, Brazil: Ministry of Health (Brazil).                                                                                                                                                                                                                                                                                                                                 | Country   | 1993-1997 | Administrative record |
| Urolithiasis                                        | Health Institute (São Paulo, Brazil), State University of Campinas, São Paulo Municipal Health Department, São Paulo State University, University of São Paulo. Brazil - São Paulo Health Survey 2008-2009.                                                                                                                                                                                                                                                | São Paulo | 2002-2008 | Survey                |
| Urolithiasis                                        | Ministry of Health (Brazil). Brazil Hospital Information System 1998-2002.                                                                                                                                                                                                                                                                                                                                                                                 |           | 1998-2002 | Administrative record |
| Urolithiasis                                        | Brazilian Institute of Geography and Statistics (IBGE), Ministry of Health (Brazil), Ministry of Planning, Budget, and Management (Brazil), Brazil National Health Survey 2013. Rio de Janeiro, Brazil: Brazilian Institute of Geography and Statistics (IBGE).                                                                                                                                                                                            | Country   | 2013-2014 | Survey                |
| Benign prostatic hyperplasia                        | Ministry of Health (Brazil). Brazil Hospital Information System 1997. Rio de Janeiro, Brazil: Ministry of Health (Brazil).                                                                                                                                                                                                                                                                                                                                 | Country   | 1993-1997 | Administrative record |
| Benign prostatic hyperplasia                        | Ministry of Health (Brazil). Brazil Hospital Information System 2013-2014.                                                                                                                                                                                                                                                                                                                                                                                 |           | 2013-2017 | Administrative record |
| Benign prostatic hyperplasia                        | Brazil World Health Survey 2003                                                                                                                                                                                                                                                                                                                                                                                                                            | Country   | 2002-2003 | Survey                |
| Benign prostatic hyperplasia                        | Brazilian Institute of Geography and Statistics (IBGE), Ministry of Health (Brazil), Ministry of Planning, Budget, and Management (Brazil), Brazil National Health Survey 2013. Rio de Janeiro, Brazil: Brazilian Institute of Geography and Statistics (IBGE).                                                                                                                                                                                            | Country   | 2013-2014 | Survey                |
| Benign prostatic hyperplasia                        | Ministry of Health (Brazil). Brazil Hospital Information System 2003-2007.                                                                                                                                                                                                                                                                                                                                                                                 |           | 2003-2007 | Administrative record |
| Benign prostatic hyperplasia                        | Health Institute (São Paulo, Brazil), State University of Campinas, São Paulo Municipal Health Department, São Paulo State University, University of São Paulo. Brazil - São Paulo Health Survey 2008-2009.                                                                                                                                                                                                                                                | São Paulo | 2002-2008 | Survey                |
| Benign prostatic hyperplasia                        | Ministry of Health (Brazil). Brazil Hospital Information System 2008-2012.                                                                                                                                                                                                                                                                                                                                                                                 |           | 2008-2012 | Administrative record |
| Benign prostatic hyperplasia                        | Ministry of Health (Brazil). Brazil Hospital Information System 1998-2002.                                                                                                                                                                                                                                                                                                                                                                                 |           | 1998-2002 | Administrative record |
| Gynecological diseases                              | Ministry of Health (Brazil). Brazil Hospital Information System 2008-2012.                                                                                                                                                                                                                                                                                                                                                                                 |           | 2008-2012 | Administrative record |

|                             |                                                                                                                                                                                                                                                                 |           |           |                       |
|-----------------------------|-----------------------------------------------------------------------------------------------------------------------------------------------------------------------------------------------------------------------------------------------------------------|-----------|-----------|-----------------------|
| Gynecological diseases      | Ministry of Health (Brazil). Brazil Hospital Information System 1997. Rio de Janeiro, Brazil: Ministry of Health (Brazil).                                                                                                                                      | Country   | 1993-1997 | Administrative record |
| Gynecological diseases      | Ministry of Health (Brazil). Brazil Hospital Information System 1998-2002.                                                                                                                                                                                      |           | 1998-2002 | Administrative record |
| Gynecological diseases      | Ministry of Health (Brazil). Brazil Hospital Information System 2003-2007.                                                                                                                                                                                      |           | 2003-2007 | Administrative record |
| Gynecological diseases      | Ministry of Health (Brazil). Brazil Hospital Information System 2013-2014.                                                                                                                                                                                      |           | 2013-2017 | Administrative record |
| Uterine fibroids            | Ministry of Health (Brazil). Brazil Hospital Information System 2013-2014.                                                                                                                                                                                      |           | 2013-2017 | Administrative record |
| Uterine fibroids            | Ministry of Health (Brazil). Brazil Hospital Information System 1997. Rio de Janeiro, Brazil: Ministry of Health (Brazil).                                                                                                                                      | Country   | 1993-1997 | Administrative record |
| Uterine fibroids            | Ministry of Health (Brazil). Brazil Hospital Information System 1998-2002.                                                                                                                                                                                      |           | 1998-2002 | Administrative record |
| Uterine fibroids            | Zimmermann A, Bernuit D, Gerlinger C, Schaefer M, Geppert K. Prevalence, symptoms and management of uterine fibroids: an international internet-based survey of 21,746 women. . 2012; 12: 6.                                                                    |           | 2009      | Scientific literature |
| Uterine fibroids            | Brazilian Institute of Geography and Statistics (IBGE), Ministry of Health (Brazil), Ministry of Planning, Budget, and Management (Brazil). Brazil National Health Survey 2013. Rio de Janeiro, Brazil: Brazilian Institute of Geography and Statistics (IBGE). | Country   | 2013-2014 | Survey                |
| Uterine fibroids            | Ministry of Health (Brazil). Brazil Hospital Information System 2008-2012.                                                                                                                                                                                      |           | 2008-2012 | Administrative record |
| Uterine fibroids            | Ministry of Health (Brazil). Brazil Hospital Information System 2003-2007.                                                                                                                                                                                      |           | 2003-2007 | Administrative record |
| Uterine fibroids            | Brazil World Health Survey 2003                                                                                                                                                                                                                                 | Country   | 2002-2003 | Survey                |
| Uterine fibroids            | Health Institute (São Paulo, Brazil), State University of Campinas, São Paulo Municipal Health Department, São Paulo State University, University of São Paulo, Brazil - São Paulo Health Survey 2008-2009.                                                     | São Paulo | 2002-2008 | Survey                |
| Polycystic ovarian syndrome | Ministry of Health (Brazil). Brazil Hospital Information System 2013-2014.                                                                                                                                                                                      |           | 2013-2017 | Administrative record |
| Polycystic ovarian syndrome | Ministry of Health (Brazil). Brazil Hospital Information System 2003-2007.                                                                                                                                                                                      | Country   | 2002-2003 | Survey                |
| Polycystic ovarian syndrome | Melo AS, Vieira CS, Barbieri MA, Rosa E-Silva ACIS, Silva AAM, Cardoso VC, Reis RM, Ferriani RA, Silva-de-Sá MF, Bettiol H. High prevalence of polycystic ovary syndrome in women born small for gestational age. . 2010; 25(8): 2124-31.                       |           | 2007-2008 | Scientific literature |
| Polycystic ovarian syndrome | Ministry of Health (Brazil). Brazil Hospital Information System 2008-2012.                                                                                                                                                                                      |           | 2008-2012 | Administrative record |
| Polycystic ovarian syndrome | Health Institute (São Paulo, Brazil), State University of Campinas, São Paulo Municipal Health Department, São Paulo State University, University of São Paulo, Brazil - São Paulo Health Survey 2008-2009.                                                     | São Paulo | 2002-2008 | Survey                |
| Polycystic ovarian syndrome | Ministry of Health (Brazil). Brazil Hospital Information System 1997. Rio de Janeiro, Brazil: Ministry of Health (Brazil).                                                                                                                                      | Country   | 1993-1997 | Administrative record |
| Polycystic ovarian syndrome | Brazilian Institute of Geography and Statistics (IBGE), Ministry of Health (Brazil), Ministry of Planning, Budget, and Management (Brazil). Brazil National Health Survey 2013. Rio de Janeiro, Brazil: Brazilian Institute of Geography and Statistics (IBGE). | Country   | 2013-2014 | Survey                |
| Polycystic ovarian syndrome | Ministry of Health (Brazil). Brazil Hospital Information System 1998-2002.                                                                                                                                                                                      |           | 1998-2002 | Administrative record |
| Polycystic ovarian syndrome | Ministry of Health (Brazil). Brazil Hospital Information System 2003-2007.                                                                                                                                                                                      |           | 2003-2007 | Administrative record |
| Endometriosis               | Ministry of Health (Brazil). Brazil Hospital Information System 2008-2012.                                                                                                                                                                                      |           | 2008-2012 | Administrative record |
| Endometriosis               | Ministry of Health (Brazil). Brazil Hospital Information System 1998-2002.                                                                                                                                                                                      |           | 1998-2002 | Administrative record |
| Endometriosis               | Health Institute (São Paulo, Brazil), State University of Campinas, São Paulo Municipal Health Department, São Paulo State University, University of São Paulo, Brazil - São Paulo Health Survey 2008-2009.                                                     | São Paulo | 2002-2008 | Survey                |
| Endometriosis               | Ministry of Health (Brazil). Brazil Hospital Information System 2003-2007.                                                                                                                                                                                      |           | 2003-2007 | Administrative record |
| Endometriosis               | Ministry of Health (Brazil). Brazil Hospital Information System 2013-2014.                                                                                                                                                                                      |           | 2013-2017 | Administrative record |
| Endometriosis               | Ministry of Health (Brazil). Brazil Hospital Information System 1997. Rio de Janeiro, Brazil: Ministry of Health (Brazil).                                                                                                                                      | Country   | 1993-1997 | Administrative record |
| Endometriosis               | Brazil World Health Survey 2003                                                                                                                                                                                                                                 | Country   | 2002-2003 | Survey                |
| Endometriosis               | Brazilian Institute of Geography and Statistics (IBGE), Ministry of Health (Brazil), Ministry of Planning, Budget, and Management (Brazil). Brazil National Health Survey 2013. Rio de Janeiro, Brazil: Brazilian Institute of Geography and Statistics (IBGE). | Country   | 2013-2014 | Survey                |
| Genital prolapse            | Ministry of Health (Brazil). Brazil Hospital Information System 1998-2002.                                                                                                                                                                                      |           | 1998-2002 | Administrative record |
| Genital prolapse            | Ministry of Health (Brazil). Brazil Hospital Information System 2013-2014.                                                                                                                                                                                      |           | 2013-2017 | Administrative record |
| Genital prolapse            | Brazilian Institute of Geography and Statistics (IBGE), Ministry of Health (Brazil), Ministry of Planning, Budget, and Management (Brazil). Brazil National Health Survey 2013. Rio de Janeiro, Brazil: Brazilian Institute of Geography and Statistics (IBGE). | Country   | 2013-2014 | Survey                |
| Genital prolapse            | Health Institute (São Paulo, Brazil), State University of Campinas, São Paulo Municipal Health Department, São Paulo State University, University of São Paulo, Brazil - São Paulo Health Survey 2008-2009.                                                     | São Paulo | 2002-2008 | Survey                |
| Genital prolapse            | Araujo MP, Girão, Manoel João Batista Castello, Girão, Manoel João Batista Castello, Sartori, Marair Gracio Ferreira. Pelvic floor disorders among indigenous women living in Xingu Indian Park, Brazil. . 2009; 20(9): 1079-84.                                |           | 2006      | Scientific literature |
| Genital prolapse            | Ministry of Health (Brazil). Brazil Hospital Information System 2003-2007.                                                                                                                                                                                      |           | 2003-2007 | Administrative record |
| Genital prolapse            | Ministry of Health (Brazil). Brazil Hospital Information System 2008-2012.                                                                                                                                                                                      |           | 2008-2012 | Administrative record |
| Genital prolapse            | Ministry of Health (Brazil). Brazil Hospital Information System 1997. Rio de Janeiro, Brazil: Ministry of Health (Brazil).                                                                                                                                      | Country   | 1993-1997 | Administrative record |
| Genital prolapse            | Brazil World Health Survey 2003                                                                                                                                                                                                                                 | Country   | 2002-2003 | Survey                |
| Premenstrual syndrome       | Silva CML da, Gigante DP, Carret MLV, Fassa AG. Population study of premenstrual syndrome. . 2006; 40(1): 47-56.                                                                                                                                                |           | 2003      | Scientific literature |
| Premenstrual syndrome       | Heinemann LAJ, Minh TD, Filonenko A, Uhl-Hochgräber K. Explorative evaluation of the impact of severe premenstrual disorders on work absenteeism and productivity. . 2010; 20(1): 58-65.                                                                        |           | 2007      | Scientific literature |
| Premenstrual syndrome       | Silva CML da, Gigante DP, Minten GC. Premenstrual symptoms and syndrome according to age at menarche in a 1982 birth cohort in southern Brazil. . 2008; 24(4): 835-44.                                                                                          |           | 2004-2005 | Scientific literature |
| Thalassemias                | Melo-Reis PR de, Naoum PC, Diniz-Filho JAF, Dias-Penna KGB, Mesquita MM de, Balestra FA, Tenes YMF, Mascarenhas C do C, Chen LC. Prevalence of thalassemias and variant hemoglobins in the state of Goiás, Brazil. . 2006; 42(6): 425-30.                       |           | 2003-2004 | Scientific literature |
| Thalassemias                | Carlos AM, Souza RA, Souza BM, Pereira Gde A, Tostes Junior S, Martins PR, Moraes-Souza H. Hemoglobinopathies in newborns in the southern region of the Triângulo Mineiro, Brazil. Cross-sectional study. . 2015; 133(5): 439-44.                               |           | 2011-2013 | Scientific literature |
| Thalassemias                | Wagner SC, de Castro SM, Gonzalez TP, Santin AP, Zaleski CF, Azevedo LA, Dreau H, Henderson S, Old J, Hutz MH. Neonatal screening for hemoglobinopathies: results of a public health system in South Brazil. . 2010; 14(4): 565-9.                              |           | 2004-2007 | Scientific literature |
| Thalassemias                | SM. Newborn screening program for hemoglobinopathies in Rio de Janeiro, Brazil. . 2014; 61(1): 34-9.                                                                                                                                                            |           | 2000-2010 | Scientific literature |
| Thalassemias                | Sickle Cell and Thalassemias Prevalence Data, Personal Correspondence with David Zago MA, Costa FF, Tone LG, Bottura C. Hereditary hemoglobin disorders in a Brazilian population. . 1983; 33(2): 125-9.                                                        |           | 1995-2010 | Estimate              |
| Thalassemias                | Watanabe AM, Pianovski MAD, Zanis Neto J, Lichtvan LCL, Chautard-Freire-Maia EA, Domingos MT, Wittig EO. [Prevalence of hemoglobin S in the State of Paraná, Brazil, based on neonatal screening]. . 2008; 24(5): 993-1000.                                     |           | 2002-2004 | Scientific literature |
| Sickle cell disorders       | Paixao MC, Cunha Ferraz MH, Januario JN, Viana MB, Lima JM. Reliability of isoelectrofocusing for the detection of Hb S, Hb C, and Hb D in a pioneering population-based program of newborn screening in Brazil. . 2001; 25(3): 297-303.                        |           | 1998      | Scientific literature |
| Sickle cell disorders       | SM. Newborn screening program for hemoglobinopathies in Rio de Janeiro, Brazil. . 2014; 61(1): 34-9.                                                                                                                                                            |           | 2000-2010 | Scientific literature |
| Sickle cell disorders       | Naoum PC, Angulo I de L, Brandao AC, Graciano RA, Spir M, Nomura E, Anjos ID. [Detection and awareness of patients with hemoglobinopathies in the regions of Sao Jose do Rio Preto and Presidente Prudente, SP (Brazil)]. . 1985; 19(4): 364-73.                |           | 1983-1984 | Scientific literature |
| Sickle cell disorders       | Pinheiro LS, Gonçalves RP, Tomé CAS, Alcântara AEE, Marques ARC, Silva MM da. Prevalência de hemoglobina S em recém-nascidos de Fortaleza: importância da investigação neonatal. . 2006; 28(2): 122-5.                                                          |           | 2001-2002 | Scientific literature |
| Sickle cell disorders       | Azevedo ES, Alves AF, Da Silva MC, Souza MG, Muniz Dias Lima AM, Azevedo WC. Distribution of abnormal hemoglobins and glucose-6-phosphate dehydrogenase variants in 1200 school children of Bahia, Brazil. . 1980; 53(4): 509-12.                               |           | 1977-1979 | Scientific literature |
| Sickle cell disorders       | Fonseca GH, Souza R, Salemi VMC, Jardim CVP, Gualandro SFM. Pulmonary hypertension diagnosed by right heart catheterisation in sickle cell disease. . 2012; 39(1): 112-8.                                                                                       |           | 2007-2010 | Scientific literature |
| Sickle cell disorders       | with anemia in Amazonian children: a population-based, cross-sectional study. . 2012; 7(5): e36341.                                                                                                                                                             |           | 2007      | Scientific literature |
| Sickle cell disorders       | Brandellise S, Pinheiro V, Gabetta CS, Hambleton I, Serjeant B, Serjeant G. Newborn screening for sickle cell disease in Brazil: the Campinas experience. . 2004; 26(1): 15-9.                                                                                  |           | 1992-2000 | Scientific literature |
| Sickle cell disorders       | Diniz D, Guedes C, Barbosa L, Taul PL, Magalhães I. Prevalence of sickle cell trait and sickle cell anemia among newborns in the Federal District, Brazil, 2004 to 2006. . 2009; 25(1): 188-94.                                                                 |           | 2004-2006 | Scientific literature |
| Sickle cell disorders       | De Araújo MCPe, Serafim ESS, de Castro Jr WAP, de Medeiros TMD. Prevalence of abnormal hemoglobins in newborns in Natal, Rio Grande do Norte, Brazil. . 2004; 20(1): 123-8.                                                                                     |           | 2001      | Scientific literature |
| Sickle cell disorders       | Lobo Cl de C, Bueno LM, Moura P, Ogeda LI, Castilho S, de Carvalho SMF. Neonatal screening for hemoglobinopathies in Rio de Janeiro, Brazil. . 2003; 13(2-3): 154-9.                                                                                            |           | 2000-2001 | Scientific literature |
| Sickle cell disorders       | Fernandes APPC, Januario JN, Cangussu CB, Macedo DL de, Viana MB. Mortality of children with sickle cell disease: a population study. . 2010; 86(4): 279-84.                                                                                                    |           | 1998-2005 | Scientific literature |

|                                                   |                                                                                                                                                                                                                                                                   |           |           |                       |
|---------------------------------------------------|-------------------------------------------------------------------------------------------------------------------------------------------------------------------------------------------------------------------------------------------------------------------|-----------|-----------|-----------------------|
| Sickle cell disorders                             | Wagner SC, de Castro SM, Gonzalez TP, Santin AP, Zaleski CF, Azevedo LA, Dreau H, Henderson S, Old J, Hutz MH. Neonatal screening for hemoglobinopathies: results of a public health system in South Brazil. . 2010; 14(4): 565-9.                                |           | 2004-2007 | Scientific literature |
| Sickle cell disorders                             | Zago MA, Costa FF, Tone LG, Bottura C. Hereditary hemoglobin disorders in a Brazilian population. . 1983; 33(2): 125-9.                                                                                                                                           |           | 1979-1982 | Scientific literature |
| Sickle cell disorders                             | Melo-Res PR de, Naoum PC, Diniz-Filho JAF, Dias-Penna KGB, Mesquita MM de, Balestra FA, Ternes YMF, Mascarenhas C do C, Chen LC. Prevalence of thalassemias and variant hemoglobins in the state of Goiás, Brazil. . 2006; 42(6): 425-30.                         |           | 2003-2004 | Scientific literature |
| Sickle cell disorders                             | Carlos AM, Souza RA, Souza BM, Pereira Gde A, Tostes Junior S, Martins PR, Moraes-Souza H. Hemoglobinopathies in newborns in the southern region of the Triângulo Mineiro, Brazil. Cross-sectional study. . 2015; 133(5): 439-44.                                 |           | 2011-2013 | Scientific literature |
| Sickle cell disorders                             | Salzano FM, Tondo CV. Hemoglobin types in Brazilian populations. . 1982; 6(1): 85-87.                                                                                                                                                                             |           | 1950-1980 | Scientific literature |
| Sickle cell disorders                             | hydroxycarbamide therapy on survival of children with sickle cell disease. . 2013; 161(6): 852-60.                                                                                                                                                                |           | 2000-2009 | Scientific literature |
| Sickle cell disorders                             | Sickle Cell and Thalassemias Prevalence Data, Personal Correspondence with David with anemia in Amazonian children: a population-based, cross-sectional study. . 2012; 7(5): e36341.                                                                              |           | 1995-2010 | Estimate              |
| G6PD deficiency                                   | Saldanha PH, Nóbrega FG, Maia JC. Distribution and heredity of erythrocyte G6PD activity and electrophoretic variants among different racial groups at São Paulo, Brazil. . 1969; 6(1): 48-54.                                                                    |           | 2007      | Scientific literature |
| G6PD deficiency                                   | Barreto OCO. Erythrocyte glucose-6-phosphate dehydrogenase deficiency in São Paulo, Brazil. . 1970; 3(1/2): 61-5.                                                                                                                                                 |           | 1967-1969 | Scientific literature |
| G6PD deficiency                                   | Neto EC, Portal L, Ferreira LF. G6PD deficiency in an unselected Brazilian population. . 1999; 30(Suppl 2): 87.                                                                                                                                                   |           | 1968-1970 | Scientific literature |
| G6PD deficiency                                   | Compri MB, Saad ST, Ramalho AS. Genetico-epidemiological and molecular investigation of G-6-PD deficiency in a Brazilian community. . 2000; 16(2): 335-42.                                                                                                        |           | 1997-1999 | Scientific literature |
| G6PD deficiency                                   | Castro S, Weber R, Dadalt V, Tavares V, Giugliani R. Prevalence of G6PD deficiency in newborns in the south of Brazil. . 2006; 13(2): 85-6.                                                                                                                       |           | 1995-1998 | Scientific literature |
| G6PD deficiency                                   | Ondei LS, Silveira LM, Leite AA, Souza DRS, Pinhel MAS, Percário S, Ricci Júnior O, Bonini-Domingos CR. Lipid peroxidation and antioxidant capacity of G6PD-deficient patients with A-(202G>A) mutation. . 2009; 8(4): 1345-51.                                   |           | 2003      | Scientific literature |
| G6PD deficiency                                   | Neto M, De JP, Dourado MV, Reis MG dos, Gonçalves MS. A novel c.197T -> A variant among Brazilian neonates with glucose-6-phosphate dehydrogenase deficiency. . 2008; 31(1): 33-5.                                                                                |           | 2006-2008 | Scientific literature |
| G6PD deficiency                                   | Santana MS, Monteiro WM, Siqueira AM, Costa MF, Sampaio V, Lacerda MV, Lacerim MG. Glucose-6-phosphate dehydrogenase deficient variants are associated with reduced susceptibility to malaria in the Brazilian Amazon. . 2013; 107(5): 301-6.                     |           | 2000      | Scientific literature |
| G6PD deficiency                                   | Domingos IF, Hatzihofer BL, Oliveira FB, Araujo FR, Araujo AS, Lucena-Araujo AR, Bezerra MA. Prevalence and molecular defect characterization of glucose-6-phosphate dehydrogenase deficiency in Brazilian blood donors. . 2015; 37(5): e109-11.                  |           | 2009-2010 | Scientific literature |
| G6PD deficiency                                   | Azevedo ES, Alves AF, Da Silva MC, Souza MG, Muniz Dias Lima AM, Azevedo WC. Distribution of abnormal hemoglobins and glucose-6-phosphate dehydrogenase variants in 1200 school children of Bahia, Brazil. . 1980; 53(4): 509-12.                                 |           | 2010-2011 | Scientific literature |
| Endocrine, metabolic, blood, and immune disorders | Ministry of Health (Brazil). Brazil Hospital Information System 2003-2007.                                                                                                                                                                                        |           | 1977-1979 | Scientific literature |
| Endocrine, metabolic, blood, and immune disorders | Health Institute (São Paulo, Brazil), State University of Campinas, São Paulo Municipal Health Department, São Paulo State University, University of São Paulo. Brazil - São Paulo Health Survey 2008-2009.                                                       | São Paulo | 2003-2007 | Administrative record |
| Endocrine, metabolic, blood, and immune disorders | Ministry of Health (Brazil). Brazil Hospital Information System 2013-2014.                                                                                                                                                                                        |           | 2002-2008 | Survey                |
| Endocrine, metabolic, blood, and immune disorders | Ministry of Health (Brazil). Brazil Hospital Information System 1997. Rio de Janeiro, Brazil: Ministry of Health (Brazil).                                                                                                                                        | Country   | 2013-2017 | Administrative record |
| Endocrine, metabolic, blood, and immune disorders | Brazilian Institute of Geography and Statistics (IBGE), Ministry of Health (Brazil), Ministry of Planning, Budget, and Management (Brazil). Brazil National Health Survey 2013. Rio de Janeiro, Brazil: Brazilian Institute of Geography and Statistics (IBGE).   | Country   | 1993-1997 | Administrative record |
| Endocrine, metabolic, blood, and immune disorders | Ministry of Health (Brazil). Brazil Hospital Information System 2008-2012.                                                                                                                                                                                        |           | 2013-2014 | Survey                |
| Endocrine, metabolic, blood, and immune disorders | Brazil World Health Survey 2003                                                                                                                                                                                                                                   | Country   | 2008-2012 | Administrative record |
| Endocrine, metabolic, blood, and immune disorders | Ministry of Health (Brazil). Brazil Hospital Information System 1998-2002.                                                                                                                                                                                        |           | 2002-2003 | Survey                |
| Rheumatoid arthritis                              | Senna ER, De Barros ALP, Silva EO, Costa IF, Pereira LVB, Ciconelli RM, Ferraz MB. Prevalence of rheumatic diseases in Brazil: a study using the COPCORD approach. . 2004; 31(3): 594-7.                                                                          |           | 1998-2002 | Administrative record |
| Rheumatoid arthritis                              | Bennett K, Cardiel MH, Ferraz MB, Riedemann P, Goldsmith CH, Tugwell P. Community screening for rheumatic disorder: cross cultural adaptation and screening characteristics of the COPCORD Core Questionnaire in Brazil, Chile, and Mexico. . 1997; 24(1): 160-8. |           | 2001      | Scientific literature |
| Rheumatoid arthritis                              | Meucci RD, Fassa AG, Paniz VM, Silva MC, Wegman DH. Increase of chronic low back pain prevalence in a medium-sized city of southern Brazil. . 2013; 155.                                                                                                          |           | 1994      | Scientific literature |
| Low back and neck pain                            | Meziat Filho N, Coutinho ES, Azevedo e Silva G. Association between home posture habits and low back pain in high school adolescents. . 2015; 24(3): 425-33.                                                                                                      |           | 2002-2010 | Scientific literature |
| Low back and neck pain                            | Almeida ICG, Sá KN, Silva M, Baptista A, Matos MA, Lessa Í. Chronic low back pain prevalence in the population of the city of Salvador. . 2008; 43(3): 96302.                                                                                                     |           | 2000      | Scientific literature |
| Low back and neck pain                            | De Vitta A, Martinez MG, Piza NT, Simeão SF de AP, Ferreira NP. [Prevalence of lower back pain and associated factors in students]. . 2011; 27(8): 1520-8.                                                                                                        |           | 2007      | Scientific literature |
| Low back and neck pain                            | Mendoza-Sassi R, Béria JU, Fiori N, Bortolotto A. Prevalence of signs and symptoms, associated sociodemographic factors and resulting actions in an urban center in southern Brazil. . 2006; 20(1): 22-8.                                                         |           | 2000      | Scientific literature |
| Low back and neck pain                            | Blay SL, Andreoli SB, Dewey ME, Gastal FL. Co-occurrence of chronic physical pain and psychiatric morbidity in a community sample of older people. . 2007; 22(9): 902-8.                                                                                          |           | 2004      | Scientific literature |
| Low back and neck pain                            | Onofrio AC, da Silva MC, Domingues MR, Romaldi AJ. Acute low back pain in high school adolescents in Southern Brazil: prevalence and associated factors. . 2012; 21(7): 1234-40.                                                                                  |           | 2009      | Scientific literature |
| Low back and neck pain                            | associated factors of back pain in adults from southern Brazil: a population-based study. . 2011; 15(1): 31-6.                                                                                                                                                    |           | 2007      | Scientific literature |
| Low back and neck pain                            | Brazil World Health Survey 2003                                                                                                                                                                                                                                   | Country   | 2003      | Survey                |
| Low back and neck pain                            | Silva MCD, Fassa AG, Valle NCI. [Chronic low back pain in a Southern Brazilian adult population: prevalence and associated factors]. . 2004; 20(2): 377-85.                                                                                                       |           | 2002      | Scientific literature |
| Low back pain                                     | Brazil World Health Survey 2003                                                                                                                                                                                                                                   | Country   | 2003      | Survey                |
| Low back pain                                     | Silva MCD, Fassa AG, Valle NCI. [Chronic low back pain in a Southern Brazilian adult population: prevalence and associated factors]. . 2004; 20(2): 377-85.                                                                                                       |           | 2002      | Scientific literature |
| Low back pain                                     | Meucci RD, Fassa AG, Paniz VM, Silva MC, Wegman DH. Increase of chronic low back pain prevalence in a medium-sized city of southern Brazil. . 2013; 155.                                                                                                          |           | 2002-2010 | Scientific literature |
| Low back pain                                     | associated factors of back pain in adults from southern Brazil: a population-based study. . 2011; 15(1): 31-6.                                                                                                                                                    |           | 2007      | Scientific literature |
| Low back pain                                     | Blay SL, Andreoli SB, Dewey ME, Gastal FL. Co-occurrence of chronic physical pain and psychiatric morbidity in a community sample of older people. . 2007; 22(9): 902-8.                                                                                          |           | 2004      | Scientific literature |
| Low back pain                                     | Almeida ICG, Sá KN, Silva M, Baptista A, Matos MA, Lessa Í. Chronic low back pain prevalence in the population of the city of Salvador. . 2008; 43(3): 96302.                                                                                                     |           | 2000      | Scientific literature |
| Low back pain                                     | De Vitta A, Martinez MG, Piza NT, Simeão SF de AP, Ferreira NP. [Prevalence of lower back pain and associated factors in students]. . 2011; 27(8): 1520-8.                                                                                                        |           | 2007      | Scientific literature |
| Low back pain                                     | Meziat Filho N, Coutinho ES, Azevedo e Silva G. Association between home posture habits and low back pain in high school adolescents. . 2015; 24(3): 425-33.                                                                                                      |           | 2012-2013 | Scientific literature |
| Low back pain                                     | Onofrio AC, da Silva MC, Domingues MR, Romaldi AJ. Acute low back pain in high school adolescents in Southern Brazil: prevalence and associated factors. . 2012; 21(7): 1234-40.                                                                                  |           | 2009      | Scientific literature |
| Low back pain                                     | Mendoza-Sassi R, Béria JU, Fiori N, Bortolotto A. Prevalence of signs and symptoms, associated sociodemographic factors and resulting actions in an urban center in southern Brazil. . 2006; 20(1): 22-8.                                                         |           | 2000      | Scientific literature |
| Other musculoskeletal disorders                   | Bennett K, Cardiel MH, Ferraz MB, Riedemann P, Goldsmith CH, Tugwell P. Community screening for rheumatic disorder: cross cultural adaptation and screening characteristics of the COPCORD Core Questionnaire in Brazil, Chile, and Mexico. . 1997; 24(1): 160-8. |           | 1994      | Scientific literature |
| Congenital birth defects                          | Santos LM, Lecca RC, Cortez-Escalante JJ, Sanchez MN, Rodrigues HG. Prevention of neural tube defects by the fortification of flour with folic acid: a population-based retrospective study in Brazil. . 2016; 94(1): 22-9.                                       |           | 2001-2014 | Scientific literature |
| Congenital birth defects                          | Brazil Latin American Collaborative Study of Congenital Malformations Data 1993-1998 - WHO as it appears in                                                                                                                                                       | Country   | 1993-1998 | Disease registry      |
| Congenital birth defects                          | Melo BF, Aguiar MB, Bouzada MC, Aguiar RL, Pereira AK, Paixao GM, Linhares MC, Valerio FC, Simões E Silva AC, Oliveira EA. Early risk factors for neonatal mortality in CAKUT: analysis of 524 affected newborns. . 2012; 27(6): 965-72.                          |           | 1996-2006 | Scientific literature |
| Neural tube defects                               | Ministry of Health (Brazil). Brazil Hospital Information System 2013-2014.                                                                                                                                                                                        |           | 2013-2017 | Administrative record |
| Neural tube defects                               | Brazil Latin American Collaborative Study of Congenital Malformations Data 1993-1998 - WHO as it appears in                                                                                                                                                       | Country   | 1993-1998 | Disease registry      |
| Neural tube defects                               | Santos LM, Lecca RC, Cortez-Escalante JJ, Sanchez MN, Rodrigues HG. Prevention of neural tube defects by the fortification of flour with folic acid: a population-based retrospective study in Brazil. . 2016; 94(1): 22-9.                                       |           | 2001-2014 | Scientific literature |

|                                 |                                                                                                                                                                                                                                                                                                                                                         |           |           |                       |
|---------------------------------|---------------------------------------------------------------------------------------------------------------------------------------------------------------------------------------------------------------------------------------------------------------------------------------------------------------------------------------------------------|-----------|-----------|-----------------------|
| Neural tube defects             | Bellizzi S, Ali MM, Abalos E, Betran AP, Kapila J, Pileggi-Castro C, Vogel JP, Merialdi M. Are hypertensive disorders in pregnancy associated with congenital malformations in offspring? Evidence from the WHO Multicountry cross sectional survey on maternal and newborn health. .2016; 16(1): 198.                                                  |           | 2010-2011 | Scientific literature |
| Neural tube defects             | Institute for Health Metrics and Evaluation (IHME). IHME GBD DisMod Congenital Anomalies Birth Prevalence Estimates.                                                                                                                                                                                                                                    | Global    | 1990-2016 | Modeled data          |
| Neural tube defects             | Brazil World Health Survey 2003                                                                                                                                                                                                                                                                                                                         | Country   | 2002-2003 | Survey                |
| Neural tube defects             | Brazilian Institute of Geography and Statistics (IBGE), Ministry of Health (Brazil), Ministry of Planning, Budget, and Management (Brazil). Brazil National Health Survey 2013. Rio de Janeiro, Brazil: Brazilian Institute of Geography and Statistics (IBGE).                                                                                         | Country   | 2013-2014 | Survey                |
| Neural tube defects             | Ministry of Health (Brazil). Brazil Hospital Information System 1997. Rio de Janeiro, Brazil: Ministry of Health (Brazil).                                                                                                                                                                                                                              | Country   | 1993-1997 | Administrative record |
| Neural tube defects             | Ministry of Health (Brazil). Brazil Hospital Information System 2008-2012.                                                                                                                                                                                                                                                                              |           | 2008-2012 | Administrative record |
| Neural tube defects             | Ministry of Health (Brazil). Brazil Hospital Information System 2003-2007.                                                                                                                                                                                                                                                                              |           | 2003-2007 | Administrative record |
| Neural tube defects             | Health Institute (São Paulo, Brazil), State University of Campinas, São Paulo Municipal Health Department, São Paulo State University, University of São Paulo. Brazil - São Paulo Health Survey 2008-2009.                                                                                                                                             | São Paulo | 2002-2008 | Survey                |
| Neural tube defects             | Ministry of Health (Brazil). Brazil Hospital Information System 1998-2002.                                                                                                                                                                                                                                                                              |           | 1998-2002 | Administrative record |
| Congenital heart anomalies      | Lette DCF, de Mendonça JT, Cipolotti R, de Melo EV. Heart defects treatment in Sergipe: propose of resources' rationalization to improve care. . 2012; 27(2): 224-30.                                                                                                                                                                                   |           | 2000-2009 | Scientific literature |
| Congenital heart anomalies      | Brazilian Institute of Geography and Statistics (IBGE), Ministry of Health (Brazil), Ministry of Planning, Budget, and Management (Brazil). Brazil National Health Survey 2013. Rio de Janeiro, Brazil: Brazilian Institute of Geography and Statistics (IBGE).                                                                                         | Country   | 2013-2014 | Survey                |
| Congenital heart anomalies      | Brazil World Health Survey 2003                                                                                                                                                                                                                                                                                                                         | Country   | 2002-2003 | Survey                |
| Congenital heart anomalies      | Institute for Health Metrics and Evaluation (IHME). IHME GBD DisMod Less Severe Congenital Heart Anomalies Birth Prevalence Estimates.                                                                                                                                                                                                                  | Global    | 1990-2015 | Modeled data          |
| Congenital heart anomalies      | Tennant PWG, Pearce MS, Bythell M, Rankin J. 20-year survival of children born with congenital anomalies: a population-based study. Lancet. 2010; 375(9715): 649-56. and Congenital Heart Anomalies Mortality Risk With No Diagnosis or Care Estimates as provided by the Global Burden of Disease 2010 congenital anomaly expert group. [Unpublished]. |           | 1990-2015 | Estimate              |
| Congenital heart anomalies      | Roos-Hesselink J, Perloff MG, McGhie J, Spitaels S. Atrial arrhythmias in adults after repair of tetralogy of Fallot. Correlations with clinical, exercise, and echocardiographic findings. . 1995; 91(8): 2214-9.                                                                                                                                      |           | 2009-2011 | Scientific literature |
| Congenital heart anomalies      | Ministry of Health (Brazil). Brazil Hospital Information System 2008-2012.                                                                                                                                                                                                                                                                              |           | 2008-2012 | Administrative record |
| Congenital heart anomalies      | Guitti JC. Epidemiological characteristics of congenital heart diseases in Londrina, Paraná south Brazil. . 2000; 74(5): 395-404.                                                                                                                                                                                                                       |           | 1989-1998 | Scientific literature |
| Congenital heart anomalies      | Amorim LFP, Pires CAB, Lana AMA, Campos AS, Aguiar RALP, Tibúrcio JD, Siqueira AL, Mota CCC, Aguiar MJB. Presentation of congenital heart disease diagnosed at birth: analysis of 29,770 newborn infants. . 2008; 84(1): 83-90.                                                                                                                         |           | 1990-2003 | Scientific literature |
| Congenital heart anomalies      | Ministry of Health (Brazil). Brazil Hospital Information System 1998-2002.                                                                                                                                                                                                                                                                              |           | 1998-2002 | Administrative record |
| Congenital heart anomalies      | Bellizzi S, Ali MM, Abalos E, Betran AP, Kapila J, Pileggi-Castro C, Vogel JP, Merialdi M. Are hypertensive disorders in pregnancy associated with congenital malformations in offspring? Evidence from the WHO Multicountry cross sectional survey on maternal and newborn health. .2016; 16(1): 198.                                                  |           | 2010-2011 | Scientific literature |
| Congenital heart anomalies      | Ministry of Health (Brazil). Brazil Hospital Information System 2013-2014.                                                                                                                                                                                                                                                                              |           | 2013-2017 | Administrative record |
| Congenital heart anomalies      | Ministry of Health (Brazil). Brazil Hospital Information System 1997. Rio de Janeiro, Brazil: Ministry of Health (Brazil).                                                                                                                                                                                                                              | Country   | 1993-1997 | Administrative record |
| Congenital heart anomalies      | Brazil Latin American Collaborative Study of Congenital Malformations Data 1993-1998 - WHO as it appears in                                                                                                                                                                                                                                             | Country   | 1993-1998 | Disease registry      |
| Congenital heart anomalies      | Ministry of Health (Brazil). Brazil Hospital Information System 2003-2007.                                                                                                                                                                                                                                                                              |           | 2003-2007 | Administrative record |
| Congenital heart anomalies      | Health Institute (São Paulo, Brazil), State University of Campinas, São Paulo Municipal Health Department, São Paulo State University, University of São Paulo. Brazil - São Paulo Health Survey 2008-2009.                                                                                                                                             | São Paulo | 2002-2008 | Survey                |
| Orofacial clefts                | Ministry of Health (Brazil). Brazil Hospital Information System 2008-2012.                                                                                                                                                                                                                                                                              |           | 2008-2012 | Administrative record |
| Orofacial clefts                | Ministry of Health (Brazil). Brazil Hospital Information System 2003-2007.                                                                                                                                                                                                                                                                              |           | 2003-2007 | Administrative record |
| Orofacial clefts                | Brazilian Institute of Geography and Statistics (IBGE), Ministry of Health (Brazil), Ministry of Planning, Budget, and Management (Brazil). Brazil National Health Survey 2013. Rio de Janeiro, Brazil: Brazilian Institute of Geography and Statistics (IBGE).                                                                                         | Country   | 2013-2014 | Survey                |
| Orofacial clefts                | Brazil World Health Survey 2003                                                                                                                                                                                                                                                                                                                         | Country   | 2002-2003 | Survey                |
| Orofacial clefts                | Ministry of Health (Brazil). Brazil Hospital Information System 2013-2014.                                                                                                                                                                                                                                                                              |           | 2013-2017 | Administrative record |
| Orofacial clefts                | Health Institute (São Paulo, Brazil), State University of Campinas, São Paulo Municipal Health Department, São Paulo State University, University of São Paulo. Brazil - São Paulo Health Survey 2008-2009.                                                                                                                                             | São Paulo | 2002-2008 | Survey                |
| Orofacial clefts                | Ministry of Health (Brazil). Brazil Hospital Information System 1997. Rio de Janeiro, Brazil: Ministry of Health (Brazil).                                                                                                                                                                                                                              | Country   | 1993-1997 | Administrative record |
| Orofacial clefts                | Bellizzi S, Ali MM, Abalos E, Betran AP, Kapila J, Pileggi-Castro C, Vogel JP, Merialdi M. Are hypertensive disorders in pregnancy associated with congenital malformations in offspring? Evidence from the WHO Multicountry cross sectional survey on maternal and newborn health. .2016; 16(1): 198.                                                  |           | 2010-2011 | Scientific literature |
| Orofacial clefts                | Ministry of Health (Brazil). Brazil Hospital Information System 1998-2002.                                                                                                                                                                                                                                                                              |           | 1998-2002 | Administrative record |
| Down syndrome                   | Brazil World Health Survey 2003                                                                                                                                                                                                                                                                                                                         | Country   | 2002-2003 | Survey                |
| Down syndrome                   | Ministry of Health (Brazil). Brazil Hospital Information System 1998-2002.                                                                                                                                                                                                                                                                              |           | 1998-2002 | Administrative record |
| Down syndrome                   | Brazilian Institute of Geography and Statistics (IBGE), Ministry of Health (Brazil), Ministry of Planning, Budget, and Management (Brazil). Brazil National Health Survey 2013. Rio de Janeiro, Brazil: Brazilian Institute of Geography and Statistics (IBGE).                                                                                         | Country   | 2013-2014 | Survey                |
| Down syndrome                   | Ministry of Health (Brazil). Brazil Hospital Information System 2003-2007.                                                                                                                                                                                                                                                                              |           | 2003-2007 | Administrative record |
| Down syndrome                   | Ministry of Health (Brazil). Brazil Hospital Information System 2013-2014.                                                                                                                                                                                                                                                                              |           | 2013-2017 | Administrative record |
| Down syndrome                   | Health Institute (São Paulo, Brazil), State University of Campinas, São Paulo Municipal Health Department, São Paulo State University, University of São Paulo. Brazil - São Paulo Health Survey 2008-2009.                                                                                                                                             | São Paulo | 2002-2008 | Survey                |
| Down syndrome                   | Castilla EE, Rittler M, Dutra MG, Lopez-Camelo JS, Campaña H, Paz JE, Orioli IM. Survival of children with Down syndrome in South America. ECLAMC-Downsurv Group. Latin American Collaborative Study of Congenital Malformations. . 1998; 79(2): 108-11.                                                                                                |           | 1988-1995 | Scientific literature |
| Down syndrome                   | Brazil Latin American Collaborative Study of Congenital Malformations Data 1993-1998 - WHO as it appears in                                                                                                                                                                                                                                             | Country   | 1993-1998 | Disease registry      |
| Down syndrome                   | Ministry of Health (Brazil). Brazil Hospital Information System 1997. Rio de Janeiro, Brazil: Ministry of Health (Brazil).                                                                                                                                                                                                                              | Country   | 1993-1997 | Administrative record |
| Down syndrome                   | Ministry of Health (Brazil). Brazil Hospital Information System 2008-2012.                                                                                                                                                                                                                                                                              |           | 2008-2012 | Administrative record |
| Turner syndrome                 | Ministry of Health (Brazil). Brazil Hospital Information System 2013-2014.                                                                                                                                                                                                                                                                              |           | 2013-2017 | Administrative record |
| Turner syndrome                 | Health Institute (São Paulo, Brazil), State University of Campinas, São Paulo Municipal Health Department, São Paulo State University, University of São Paulo. Brazil - São Paulo Health Survey 2008-2009.                                                                                                                                             | São Paulo | 2002-2008 | Survey                |
| Turner syndrome                 | Brazil World Health Survey 2003                                                                                                                                                                                                                                                                                                                         | Country   | 2002-2003 | Survey                |
| Turner syndrome                 | Ministry of Health (Brazil). Brazil Hospital Information System 2003-2007.                                                                                                                                                                                                                                                                              |           | 2003-2007 | Administrative record |
| Turner syndrome                 | Ministry of Health (Brazil). Brazil Hospital Information System 1997. Rio de Janeiro, Brazil: Ministry of Health (Brazil).                                                                                                                                                                                                                              | Country   | 1993-1997 | Administrative record |
| Turner syndrome                 | Brazilian Institute of Geography and Statistics (IBGE), Ministry of Health (Brazil), Ministry of Planning, Budget, and Management (Brazil). Brazil National Health Survey 2013. Rio de Janeiro, Brazil: Brazilian Institute of Geography and Statistics (IBGE).                                                                                         | Country   | 2013-2014 | Survey                |
| Turner syndrome                 | Ministry of Health (Brazil). Brazil Hospital Information System 2008-2012.                                                                                                                                                                                                                                                                              |           | 2008-2012 | Administrative record |
| Turner syndrome                 | Ministry of Health (Brazil). Brazil Hospital Information System 1998-2002.                                                                                                                                                                                                                                                                              |           | 1998-2002 | Administrative record |
| Klinefelter syndrome            | Ministry of Health (Brazil). Brazil Hospital Information System 1997. Rio de Janeiro, Brazil: Ministry of Health (Brazil).                                                                                                                                                                                                                              | Country   | 1993-1997 | Administrative record |
| Klinefelter syndrome            | Ministry of Health (Brazil). Brazil Hospital Information System 2003-2007.                                                                                                                                                                                                                                                                              |           | 2003-2007 | Administrative record |
| Klinefelter syndrome            | Ministry of Health (Brazil). Brazil Hospital Information System 1998-2002.                                                                                                                                                                                                                                                                              |           | 1998-2002 | Administrative record |
| Klinefelter syndrome            | Brazilian Institute of Geography and Statistics (IBGE), Ministry of Health (Brazil), Ministry of Planning, Budget, and Management (Brazil). Brazil National Health Survey 2013. Rio de Janeiro, Brazil: Brazilian Institute of Geography and Statistics (IBGE).                                                                                         | Country   | 2013-2014 | Survey                |
| Klinefelter syndrome            | Brazil World Health Survey 2003                                                                                                                                                                                                                                                                                                                         | Country   | 2002-2003 | Survey                |
| Klinefelter syndrome            | Ministry of Health (Brazil). Brazil Hospital Information System 2013-2014.                                                                                                                                                                                                                                                                              |           | 2013-2017 | Administrative record |
| Klinefelter syndrome            | Health Institute (São Paulo, Brazil), State University of Campinas, São Paulo Municipal Health Department, São Paulo State University, University of São Paulo. Brazil - São Paulo Health Survey 2008-2009.                                                                                                                                             | São Paulo | 2002-2008 | Survey                |
| Klinefelter syndrome            | Ministry of Health (Brazil). Brazil Hospital Information System 2008-2012.                                                                                                                                                                                                                                                                              |           | 2008-2012 | Administrative record |
| Other chromosomal abnormalities | Poll J, Groff D de P, Petry P, Mattos VF, Rosa RCM, Zen PRG, Graziadio C, Paskulin GA, Rosa RFM. Trisomy 13 (Patau syndrome) and congenital heart defects. . 2014; 164A(1): 272B.                                                                                                                                                                       |           | 1990-2012 | Scientific literature |

|                                               |                                                                                                                                                                                                                                                                                                           |           |           |                       |
|-----------------------------------------------|-----------------------------------------------------------------------------------------------------------------------------------------------------------------------------------------------------------------------------------------------------------------------------------------------------------|-----------|-----------|-----------------------|
| Other chromosomal abnormalities               | Petry P, Polli JB, Mattos VF, Rosa RCM, Zen PRG, Graziadio C, Paskulin GA, Rosa RFM. Clinical features and prognosis of a sample of patients with trisomy 13 (Patau syndrome) from Brazil. . 2013; 161A(6): 127883.                                                                                       |           | 1975-2012 | Scientific literature |
| Other chromosomal abnormalities               | Brazil Latin American Collaborative Study of Congenital Malformations Data 1993-1998 - WHO as it appears in                                                                                                                                                                                               | Country   | 1993-1998 | Disease registry      |
| Congenital musculoskeletal and limb anomalies | Health Institute (São Paulo, Brazil), State University of Campinas, São Paulo Municipal Health Department, São Paulo State University, University of São Paulo. Brazil - São Paulo Health Survey 2008-2009.                                                                                               | São Paulo | 2002-2008 | Survey                |
| Congenital musculoskeletal and limb anomalies | Ministry of Health (Brazil). Brazil Hospital Information System 2013-2014.                                                                                                                                                                                                                                |           | 2013-2017 | Administrative record |
| Congenital musculoskeletal and limb anomalies | Ministry of Health (Brazil). Brazil Hospital Information System 2008-2012.                                                                                                                                                                                                                                |           | 2008-2012 | Administrative record |
| Congenital musculoskeletal and limb anomalies | Ministry of Health (Brazil). Brazil Hospital Information System 1998-2002.                                                                                                                                                                                                                                |           | 1998-2002 | Administrative record |
| Congenital musculoskeletal and limb anomalies | Brazil Latin American Collaborative Study of Congenital Malformations Data 1993-1998 - WHO as it appears in                                                                                                                                                                                               | Country   | 1993-1998 | Disease registry      |
| Congenital musculoskeletal and limb anomalies | Brazil World Health Survey 2003                                                                                                                                                                                                                                                                           | Country   | 2002-2003 | Survey                |
| Congenital musculoskeletal and limb anomalies | Bellizzi S, Ali MM, Abalos E, Betran AP, Kapla J, Pileggi-Castro C, Vogel JP, Meraldi M. Are hypertensive disorders in pregnancy associated with congenital malformations in offspring? Evidence from the WHO Multicountry cross sectional survey on maternal and newborn health. . 2016; 16(1): 198.     |           | 2010-2011 | Scientific literature |
| Congenital musculoskeletal and limb anomalies | Ministry of Health (Brazil). Brazil Hospital Information System 1997. Rio de Janeiro, Brazil: Ministry of Health (Brazil).                                                                                                                                                                                | Country   | 1993-1997 | Administrative record |
| Congenital musculoskeletal and limb anomalies | Ministry of Health (Brazil). Brazil Hospital Information System 2003-2007.                                                                                                                                                                                                                                |           | 2003-2007 | Administrative record |
| Congenital musculoskeletal and limb anomalies | Brazilian Institute of Geography and Statistics (IBGE), Ministry of Health (Brazil), Ministry of Planning, Budget, and Management (Brazil). Brazil National Health Survey 2013. Rio de Janeiro, Brazil: Brazilian Institute of Geography and Statistics (IBGE).                                           | Country   | 2013-2014 | Survey                |
| Congenital musculoskeletal and limb anomalies | Bellizzi S, Ali MM, Abalos E, Betran AP, Kapla J, Pileggi-Castro C, Vogel JP, Meraldi M. Are hypertensive disorders in pregnancy associated with congenital malformations in offspring? Evidence from the WHO Multicountry cross sectional survey on maternal and newborn health. . 2016; 16(1): 198.     |           | 2010-2011 | Scientific literature |
| Urogenital congenital anomalies               | Sircilli MHP, e Silva FA de Q, Costa EMF, Brito VN, Arnhold JIP, Dénes FT, Inacio M, de Mendonça BB. Long-term surgical outcome of masculinizing genitoplasty in large cohort of patients with disorders of sex development. . 2010; 184(3): 1122.                                                        |           | 1965-2008 | Scientific literature |
| Urogenital congenital anomalies               | Brazil Latin American Collaborative Study of Congenital Malformations Data 1993-1998 - WHO as it appears in                                                                                                                                                                                               | Country   | 1993-1998 | Disease registry      |
| Urogenital congenital anomalies               | Melo BF, Aguiar MB, Bouzada MC, Aguiar RL, Pereira AK, Paixão GM, Linhares MC, Valerio FC, Simoes E Silva AC, Oliveira EA. Early risk factors for neonatal mortality in CAKUT: analysis of 524 affected newborns. . 2012; 27(6): 965-72.                                                                  |           | 1996-2006 | Scientific literature |
| Digestive congenital anomalies                | Brazil Latin American Collaborative Study of Congenital Malformations Data 1993-1998 - WHO as it appears in                                                                                                                                                                                               | Country   | 1993-1998 | Disease registry      |
| Dermatitis                                    | Freitas MS, Monteiro JCS, Camelo-Nunes IC, Solé D. Prevalence of asthma symptoms and associated factors in schoolchildren from Brazilian Amazon islands. . 2012; 49(6): 600-5.                                                                                                                            |           | 2007-2009 | Scientific literature |
| Dermatitis                                    | Castro LKK de, Cerci Neto A, Ferreira Filho OF. Prevalence of symptoms of asthma, rhinitis and atopic eczema among students between 6 and 7 years of age in the city of Londrina, Brazil. . 2010; 36(3): 286-92.                                                                                          |           | 2008      | Scientific literature |
| Dermatitis                                    | Williams H, Stewart A, Von Mutius E, Cookson W, Anderson HR. Is eczema really on the increase worldwide. . 2008; 121(4): 947-954.                                                                                                                                                                         | Country   | 1994-2003 | Scientific literature |
| Dermatitis                                    | Odihambo JA, Williams HC, Clayton TO, Robertson CF, Asher MI, ISAAC Phase Three Study Group. Global variations in prevalence of eczema symptoms in children from ISAAC Phase Three. . 2009; 124(6): 1251-1258.                                                                                            |           | 2000-2003 | Scientific literature |
| Dermatitis                                    | Naspitz CK. Changes in the Prevalence of Asthma and Allergic Diseases among Brazilian Schoolchildren (13-14 years old): Comparison between ISAAC Phases One and Three. . 2006; 53(1): 1321.                                                                                                               |           | 1994-2003 | Scientific literature |
| Dermatitis                                    | García-Marcos L, Robertson CF, Ross Anderson H, Ellwood P, Williams HC, Wong GW. Does migration affect asthma, rhinoconjunctivitis and eczema prevalence? Global findings from the international study of asthma and allergies in childhood. . 2014; 43(6): 1846-54.                                      |           | 2000-2003 | Scientific literature |
| Dermatitis                                    | prevalence of rhinoconjunctivitis but not asthma and atopic eczema in teenagers. . 2005; 15(3): 183.                                                                                                                                                                                                      |           | 1995-2001 | Scientific literature |
| Dermatitis                                    | Toledo MF, Rozov T, Leone C. Prevalence of asthma and allergies in 13- to 14-year-old adolescents and the frequency of risk factors in carriers of current asthma in Taubaté, São Paulo, Brazil. . 2011; 39(5): 284-90.                                                                                   |           | 2008-2010 | Scientific literature |
| Dermatitis                                    | Mascarenhas JM, Silva Rde C, Assis AM, Pinto Ede J, Conceicao JS, Barreto ML. Symptoms of asthma and associated factors in adolescents from Salvador, Bahia. . 2016; 19(1): 181-93.                                                                                                                       |           | 2009      | Scientific literature |
| Dermatitis                                    | Solé D, Mallol J, Wandalsen GF, Aguirre V, Latin American ISAAC Phase 3 Study Group. Prevalence of symptoms of eczema in Latin America: results of the International Study of Asthma and Allergies in Childhood (ISAAC) Phase 3. . 2010; 20(4): 311-23.                                                   |           | 2001-2003 | Scientific literature |
| Dermatitis                                    | infections and immunizations with asthma and allergic sensitization in ISAAC Phase Two. . 2012; 23(8): 737-46.                                                                                                                                                                                            |           | 1995-2005 | Scientific literature |
| Dermatitis                                    | Sole D, Rosario Filho NA, Sarinho ES, Camelo-Nunes IC, Barreto BA, Medeiros ML, Franco JM, Camargos PA, Mallol J, Gurgel R, Andrade DM, Furlan FP, Silva AR, Cardozo C, Andrade C. Prevalence of asthma and allergic diseases in adolescents: nine-year follow-up study (2003-2012). . 2015; 91(1): 30-5. |           | 2003-2012 | Scientific literature |
| Dermatitis                                    | Palvo F, Toledo EC, Menin AM, Jorge PP, Godoy MF, Sole D. Risk factors of childhood asthma in Sao Jose do Rio Preto, Sao Paulo, Brazil. . 2008; 54(4): 253-7.                                                                                                                                             |           | 2003-2004 | Scientific literature |
| Dermatitis                                    | Camelo-Nunes IC, Wandalsen GF, Melo KC, Naspitz CK, Solé D. [Prevalence of atopic eczema and associated symptoms in school children]. . 2004; 80(1): 60M.                                                                                                                                                 |           | 1996-1999 | Scientific literature |
| Dermatitis                                    | Tejada C dos S, Mendoza-Sassi RA, Almeida HL de Jr, Figueiredo PN, Tejada VF dos S. Impact on the quality of life of dermatological patients in southern Brazil. . 2011; 86(6): 1113-21.                                                                                                                  |           | 2008-2009 | Scientific literature |
| Psoriasis                                     | Fuji R, Mould JFI, Tang B. Burden of disease in patients with diagnosed psoriasis in Brazil: results from 2011 national health and wellness survey (NHWS). . 2012; 15: A107.                                                                                                                              |           | 2011      | Scientific literature |
| Cellulitis                                    | Brazil World Health Survey 2003                                                                                                                                                                                                                                                                           | Country   | 2002-2003 | Survey                |
| Cellulitis                                    | Ministry of Health (Brazil). Brazil Hospital Information System 1997. Rio de Janeiro, Brazil: Ministry of Health (Brazil).                                                                                                                                                                                | Country   | 1993-1997 | Administrative record |
| Cellulitis                                    | Brazilian Institute of Geography and Statistics (IBGE), Ministry of Health (Brazil), Ministry of Planning, Budget, and Management (Brazil). Brazil National Health Survey 2013. Rio de Janeiro, Brazil: Brazilian Institute of Geography and Statistics (IBGE).                                           | Country   | 2013-2014 | Survey                |
| Cellulitis                                    | Ministry of Health (Brazil). Brazil Hospital Information System 1998-2002.                                                                                                                                                                                                                                |           | 1998-2002 | Administrative record |
| Cellulitis                                    | Ministry of Health (Brazil). Brazil Hospital Information System 2013-2014.                                                                                                                                                                                                                                |           | 2013-2017 | Administrative record |
| Cellulitis                                    | Health Institute (São Paulo, Brazil), State University of Campinas, São Paulo Municipal Health Department, São Paulo State University, University of São Paulo. Brazil - São Paulo Health Survey 2008-2009.                                                                                               | São Paulo | 2002-2008 | Survey                |
| Cellulitis                                    | Ministry of Health (Brazil). Brazil Hospital Information System 2003-2007.                                                                                                                                                                                                                                |           | 2003-2007 | Administrative record |
| Cellulitis                                    | Ministry of Health (Brazil). Brazil Hospital Information System 2008-2012.                                                                                                                                                                                                                                |           | 2008-2012 | Administrative record |
| Pyoderma                                      | Ministry of Health (Brazil). Brazil Hospital Information System 2008-2012.                                                                                                                                                                                                                                |           | 2008-2012 | Administrative record |
| Pyoderma                                      | Ministry of Health (Brazil). Brazil Hospital Information System 2013-2014.                                                                                                                                                                                                                                |           | 2013-2017 | Administrative record |
| Pyoderma                                      | Brazilian Institute of Geography and Statistics (IBGE), Ministry of Health (Brazil), Ministry of Planning, Budget, and Management (Brazil). Brazil National Health Survey 2013. Rio de Janeiro, Brazil: Brazilian Institute of Geography and Statistics (IBGE).                                           | Country   | 2013-2014 | Survey                |
| Pyoderma                                      | Health Institute (São Paulo, Brazil), State University of Campinas, São Paulo Municipal Health Department, São Paulo State University, University of São Paulo. Brazil - São Paulo Health Survey 2008-2009.                                                                                               | São Paulo | 2002-2008 | Survey                |
| Pyoderma                                      | Brazil World Health Survey 2003                                                                                                                                                                                                                                                                           | Country   | 2002-2003 | Survey                |
| Pyoderma                                      | Ministry of Health (Brazil). Brazil Hospital Information System 1997. Rio de Janeiro, Brazil: Ministry of Health (Brazil).                                                                                                                                                                                | Country   | 1993-1997 | Administrative record |
| Pyoderma                                      | Ministry of Health (Brazil). Brazil Hospital Information System 2003-2007.                                                                                                                                                                                                                                |           | 2003-2007 | Administrative record |
| Pyoderma                                      | Ministry of Health (Brazil). Brazil Hospital Information System 1998-2002.                                                                                                                                                                                                                                |           | 1998-2002 | Administrative record |
| Scabies                                       | Bechelli LM, Haddad N, Pimenta WP, Pagnano PM, Melchior E Jr, Fregnan RC, Zanin LC, Arenas A. Epidemiological survey of skin diseases in schoolchildren living in the Purus Valley (Acre State, Amazonia, Brazil). . 1981; 163(1): 78-93.                                                                 |           | 1974-1975 | Scientific literature |
| Scabies                                       | Heukebach J. The epidemiology of scabies in an impoverished community in rural Brazil: presence and severity of disease are associated with poor living conditions and illiteracy. . 2009; 60(3): 436-43.                                                                                                 |           | 2003      | Scientific literature |
| Scabies                                       | Heukebach J, Wilcke T, Winter B, Feldmeier H. Epidemiology and morbidity of scabies and pediculosis capitis in resource-poor communities in Brazil. . 2005; 153(1): 150-6.                                                                                                                                |           | 2001      | Scientific literature |
| Acne vulgaris                                 | Almeida Hd, Ceccoli J, Duqula RP, Souza PR, Breung J. Sensitivity and specificity of self-reported acne in 18-year-old adolescent males. . 2013; 52(8): 946-8.                                                                                                                                            |           | 2010-2012 | Scientific literature |
| Acne vulgaris                                 | Bechelli LM, Haddad N, Pimenta WP, Pagnano PM, Melchior E Jr, Fregnan RC, Zanin LC, Arenas A. Epidemiological survey of skin diseases in schoolchildren living in the Purus Valley (Acre State, Amazonia, Brazil). . 1981; 163(1): 78-93.                                                                 |           | 1974-1975 | Scientific literature |

|                                        |                                                                                                                                                                                                                                                                                    |                |           |                       |
|----------------------------------------|------------------------------------------------------------------------------------------------------------------------------------------------------------------------------------------------------------------------------------------------------------------------------------|----------------|-----------|-----------------------|
| Acne vulgaris                          | Laczynski CMM, Cestari S da CP. Prevalence of dermatosis in scholars in the region of ABC paulista . . 2011; 86(3): 469-76.                                                                                                                                                        |                | 2006      | Scientific literature |
| Alopecia areata                        | Bechelli LM, Haddad N, Pimenta WP, Pagnano PM, Melchior E Jr, Fregnan RC, Zanin LC, Arenas A. Epidemiological survey of skin diseases in schoolchildren living in the Purus Valley (Acre State, Amazonia, Brazil) . . 1981; 163(1): 78-93.                                         |                | 1974-1975 | Scientific literature |
| Decubitus ulcer                        | Ministry of Health (Brazil). Brazil Hospital Information System 1997. Rio de Janeiro, Brazil: Ministry of Health (Brazil).                                                                                                                                                         | Country        | 1993-1997 | Administrative record |
| Decubitus ulcer                        | Ministry of Health (Brazil). Brazil Hospital Information System 2003-2007.                                                                                                                                                                                                         |                | 2003-2007 | Administrative record |
| Decubitus ulcer                        | Ministry of Health (Brazil). Brazil Hospital Information System 1998-2002.                                                                                                                                                                                                         |                | 1998-2002 | Administrative record |
| Decubitus ulcer                        | Ministry of Health (Brazil). Brazil Hospital Information System 2013-2014.                                                                                                                                                                                                         |                | 2013-2017 | Administrative record |
| Decubitus ulcer                        | Ministry of Health (Brazil). Brazil Hospital Information System 2008-2012.                                                                                                                                                                                                         |                | 2008-2012 | Administrative record |
| Decubitus ulcer                        | Health Institute (São Paulo, Brazil), State University of Campinas, São Paulo Municipal Health Department, São Paulo State University, University of São Paulo, Brazil - São Paulo Health Survey 2008-2009.                                                                        | São Paulo      | 2002-2008 | Survey                |
| Decubitus ulcer                        | Brazil World Health Survey 2003                                                                                                                                                                                                                                                    | Country        | 2002-2003 | Survey                |
| Decubitus ulcer                        | Brazilian Institute of Geography and Statistics (IBGE), Ministry of Health (Brazil), Ministry of Planning, Budget, and Management (Brazil). Brazil National Health Survey 2013. Rio de Janeiro, Brazil: Brazilian Institute of Geography and Statistics (IBGE).                    | Country        | 2013-2014 | Survey                |
| Glaucoma                               | Arieta CEL, de Oliveira DF, Lupinacci AP de C, Novaes P, Paccolla M, Jose NK, Limburg H. Cataract remains an important cause of blindness in Campinas, Brazil. . 2009; 16(1): 58-63.                                                                                               |                | 2003      | Scientific literature |
| Glaucoma                               | International Centre for Eye Health (ICEH). Brazil - Campinas Rapid Assessment of Avoidable Blindness 2004. Grootebroek, Netherlands: RAAB Repository.                                                                                                                             | São Paulo      | 2003      | Survey                |
| Glaucoma                               | Araújo Filho A, Salomão SR, Berezovsky A, Cinoto RW, Moraes PHA, Santos FRG, Belfort R Jr. Prevalence of visual impairment, blindness, ocular disorders and cataract surgery outcomes in low-income elderly from a metropolitan region of São Paulo-Brazil. . 2008; 71(2): 246-53. |                | 2002      | Scientific literature |
| Glaucoma                               | Prevalence and causes of visual impairment in a Brazilian population: the Botucatu Eye Study. . 2009; 9: 8.                                                                                                                                                                        |                | 2006-2007 | Scientific literature |
| Cataract                               | Prevalence and causes of visual impairment in a Brazilian population: the Botucatu Eye Study. . 2009; 9: 8.                                                                                                                                                                        |                | 2006-2007 | Scientific literature |
| Cataract                               | International Centre for Eye Health (ICEH). Brazil - Campinas Rapid Assessment of Avoidable Blindness 2004. Grootebroek, Netherlands: RAAB Repository.                                                                                                                             | São Paulo      | 2003      | Survey                |
| Cataract                               | Araújo Filho A, Salomão SR, Berezovsky A, Cinoto RW, Moraes PHA, Santos FRG, Belfort R Jr. Prevalence of visual impairment, blindness, ocular disorders and cataract surgery outcomes in low-income elderly from a metropolitan region of São Paulo-Brazil. . 2008; 71(2): 246-53. |                | 2002      | Scientific literature |
| Cataract                               | Arieta CEL, de Oliveira DF, Lupinacci AP de C, Novaes P, Paccolla M, Jose NK, Limburg H. Cataract remains an important cause of blindness in Campinas, Brazil. . 2009; 16(1): 58-63.                                                                                               |                | 2003      | Scientific literature |
| Macular degeneration                   | International Centre for Eye Health (ICEH). Brazil - Campinas Rapid Assessment of Avoidable Blindness 2004. Grootebroek, Netherlands: RAAB Repository.                                                                                                                             | São Paulo      | 2003      | Survey                |
| Macular degeneration                   | Prevalence and causes of visual impairment in a Brazilian population: the Botucatu Eye Study. . 2009; 9: 8.                                                                                                                                                                        |                | 2006-2007 | Scientific literature |
| Macular degeneration                   | Araújo Filho A, Salomão SR, Berezovsky A, Cinoto RW, Moraes PHA, Santos FRG, Belfort R Jr. Prevalence of visual impairment, blindness, ocular disorders and cataract surgery outcomes in low-income elderly from a metropolitan region of São Paulo-Brazil. . 2008; 71(2): 246-53. |                | 2002      | Scientific literature |
| Refraction and accommodation disorders | Brazil World Health Survey 2003                                                                                                                                                                                                                                                    | Country        | 2003      | Survey                |
| Refraction and accommodation disorders | Araújo Filho A, Salomão SR, Berezovsky A, Cinoto RW, Moraes PHA, Santos FRG, Belfort R Jr. Prevalence of visual impairment, blindness, ocular disorders and cataract surgery outcomes in low-income elderly from a metropolitan region of São Paulo-Brazil. . 2008; 71(2): 246-53. |                | 2002      | Scientific literature |
| Refraction and accommodation disorders | Arieta CEL, de Oliveira DF, Lupinacci AP de C, Novaes P, Paccolla M, Jose NK, Limburg H. Cataract remains an important cause of blindness in Campinas, Brazil. . 2009; 16(1): 58-63.                                                                                               |                | 2003      | Scientific literature |
| Refraction and accommodation disorders | Moraes Ibrahim F, Moraes Ibrahim M, Pompeo de Camargo JR, Veronese Rodrigues M de L, Scott IU, Silva Paula J. Visual impairment and myopia in Brazilian children: a population-based study. . 2013; 90(3): 223-7.                                                                  |                | 2007      | Scientific literature |
| Refraction and accommodation disorders | International Centre for Eye Health (ICEH). Brazil - Campinas Rapid Assessment of Avoidable Blindness 2004. Grootebroek, Netherlands: RAAB Repository.                                                                                                                             | São Paulo      | 2003      | Survey                |
| Refraction and accommodation disorders | Salomão SR, Cinoto RW, Berezovsky A, Araújo-Filho A, Mitsuhiro MRKH, Mendieta L, Moraes PHA, Pokharel GP, Belfort R Jr, Ellwein LB. Prevalence and causes of vision impairment and blindness in older adults in Brazil: the Sao Paulo Eye Study. . 2008; 15(3): 167-75.            |                | 2004      | Scientific literature |
| Refraction and accommodation disorders | Duarte WR, Barros AJD, Dias-da-Costa JS, Cattani JM. [Prevalence of near vision deficiency and related factors: a population-based study]. . 2003; 19(2): 551-9.                                                                                                                   |                | 1999-2000 | Scientific literature |
| Refraction and accommodation disorders | Prevalence and causes of visual impairment in a Brazilian population: the Botucatu Eye Study. . 2009; 9: 8.                                                                                                                                                                        |                | 2006-2007 | Scientific literature |
| Age-related and other hearing loss     | Baraky LR, Bento RF, Raposo NRB, Tibiriçá SHC, Ribeiro LC, Barone MMBV, Vasconcelos NB. Disabling hearing loss prevalence in Juiz de Fora, Brazil. . 2012; 78(4): 52-8.                                                                                                            |                | 2008-2011 | Scientific literature |
| Age-related and other hearing loss     | Gondim LMA, Balen SA, Zimmermann KJ, Pagnossin DF, Fialho I de M, Roggia SM. Study of the prevalence of impaired hearing and its determinants in the city of Itajaí, Santa Catarina State, Brazil. . 2012; 78(2): 27-34.                                                           |                | 2008-2011 | Scientific literature |
| Age-related and other hearing loss     | Béria JU, Raymann BCW, Gigante LP, Figueiredo ACL, Jotz G, Roithman R, Selaimen da Costa S, Garcez V, Scherer C, Smith A. Hearing impairment and socioeconomic factors: a population-based survey of an urban locality in southern Brazil. . 2007; 21(6): 381-7.                   |                | 2003      | Scientific literature |
| Age-related and other hearing loss     | Bevilacqua MC, Banhara MR, Oliveira AN, Moret AL, Alvarenga Kde F, Caldana Mde L, Camargo LM, Costa OA, Bastos JR. Survey of hearing disorders in an urban population in Rondonia, Brazil. . 2013; 47(2): 309-15.                                                                  | Rondonia       | 2005-2007 | Scientific literature |
| Age-related and other hearing loss     | Brazil Demographic Census 2010 - IPUMS                                                                                                                                                                                                                                             | Country        | 2010      | Census                |
| Age-related and other hearing loss     | Brazil General Census 2000 - IPUMS                                                                                                                                                                                                                                                 | Country        | 2000      | Census                |
| Age-related and other hearing loss     | Brazil General Census 1991 - IPUMS                                                                                                                                                                                                                                                 | Country        | 1991      | Census                |
| Age-related and other hearing loss     | Bevilacqua MC, Alvarenga K de F, Costa OA, Moret ALM. The universal newborn hearing screening in Brazil: from identification to intervention. . 2010; 74(5): 510-5.                                                                                                                | Country        | 2007-2009 | Scientific literature |
| Other vision loss                      | Araújo Filho A, Salomão SR, Berezovsky A, Cinoto RW, Moraes PHA, Santos FRG, Belfort R Jr. Prevalence of visual impairment, blindness, ocular disorders and cataract surgery outcomes in low-income elderly from a metropolitan region of São Paulo-Brazil. . 2008; 71(2): 246-53. |                | 2002      | Scientific literature |
| Other vision loss                      | International Centre for Eye Health (ICEH). Brazil - Campinas Rapid Assessment of Avoidable Blindness 2004. Grootebroek, Netherlands: RAAB Repository.                                                                                                                             | São Paulo      | 2003      | Survey                |
| Caries of deciduous teeth              | Almeida TF de, Vianna MIP, Cabral MBB de S, Cangussu MCT, Floriano FR. Family context and incidence of dental caries in preschool children living in areas covered by the Family Health Strategy in Salvador, Bahia State, Brazil. . 2012; 28(6): 1183-95.                         |                | 2007-2008 | Scientific literature |
| Caries of deciduous teeth              | Jeremias F, de Souza JF, Silva CM da C, Cordeiro R de CL, Zuanon ACC, Santos-Pinto L. Dental caries experience and Molar-Incisor Hypomineralization. . 2013; 71(3-4): 870-6.                                                                                                       |                | 2011-2012 | Scientific literature |
| Caries of deciduous teeth              | Carvalho JC, Silva EF, Gomes RR, Fonseca JAC, Mestrinho HD. Impact of enamel defects on early caries development in preschool children. . 2011; 45(4): 353-60.                                                                                                                     |                | 2009-2010 | Scientific literature |
| Caries of deciduous teeth              | Rebello MA, Lopes MC, Vieira JM, Parente RC. Dental caries and gingivitis among 15 to 19 year-old students in Manaus, AM, Brazil. . 2009; 23(3): 248-54.                                                                                                                           | Amazonas       | 2006-2008 | Scientific literature |
| Caries of deciduous teeth              | and social class in a random sample of five-year-old preschool children in a Brazilian city. . 2010; 8(2): 125-32.                                                                                                                                                                 |                | 2005      | Scientific literature |
| Caries of deciduous teeth              | Bastos JL, Nomura LH, Peres MA. Dental pain, socioeconomic status, and dental caries in young male adults from southern Brazil. . 2005; 21(5): 1416-23.                                                                                                                            | Santa Catarina | 2003      | Scientific literature |
| Caries of deciduous teeth              | prevalence and severity of dental caries in children with primary dentition. . 2012; 26(6): 564-70.                                                                                                                                                                                |                | 2010      | Scientific literature |
| Caries of deciduous teeth              | Bönecker M, Ardenghi TM, Oliveira LB, Shelham A, Marceles W. Trends in dental caries in 1- to 4-year-old children in a Brazilian city between 1997 and 2008. . 2010; 20(2): 125-31.                                                                                                |                | 1997-2008 | Scientific literature |
| Caries of deciduous teeth              | Caries is the main cause for dental pain in childhood: findings from a birth cohort. . 2012; 46(5): 488-95.                                                                                                                                                                        |                | 2009      | Scientific literature |
| Caries of deciduous teeth              | Marquezan M, Marquezan M, Faraco-Junior IM, Feldens CA, Kramer PF, Ferreira SH. Association between occlusal anomalies and dental caries in 3- to 5 year-old Brazilian children. . 2011; 38(1): 8-14.                                                                              |                | 2009-2010 | Scientific literature |
| Caries of deciduous teeth              | França-Pinto CC, Cenci MS, Correa MB, Romano AR, Peres MA, Peres KG, Matijasevic A, Santos IS, Barros AJD, Demarco FF. Association between black stains and dental caries in primary teeth: findings from a Brazilian population-based birth cohort. . 2012; 46(2): 170-6.         |                | 2009      | Scientific literature |
| Caries of deciduous teeth              | Carvalho JC, Figueiredo MJ, Vieira EO, Mestrinho HD. Caries trends in Brazilian non-privileged preschool children in 1996 and 2006. . 2009; 43(1): 2-9.                                                                                                                            |                | 1996-2006 | Scientific literature |
| Caries of deciduous teeth              | Dini EL, Holt RD, Bedi R. Caries and its association with infant feeding and oral health-related behaviors in 3-4-year-old Brazilian children. . 2000; 28(4): 241-8.                                                                                                               |                | 1998-1999 | Scientific literature |
| Caries of deciduous teeth              | Maciel SM, Marceles W, Shelham A. The relationship between sweetness preference, levels of salivary mutans streptococci and caries experience in Brazilian pre-school children. . 2001; 11(2): 123-30.                                                                             |                | 1998-1999 | Scientific literature |
| Caries of deciduous teeth              | Bastos RS, Silva RPR, Maia-Junior AF, Carvalho FS, Merlini S, Caldana ML, Lauris JRP, Bastos JRM. Dental caries profile in Monte Negro, Amazonian state of Rondônia, Brazil, in 2008. . 2010; 18(5): 437-41.                                                                       |                | 2007-2008 | Scientific literature |

|                                  |                                                                                                                                                                                                                                                                 |            |           |                       |
|----------------------------------|-----------------------------------------------------------------------------------------------------------------------------------------------------------------------------------------------------------------------------------------------------------------|------------|-----------|-----------------------|
| Caries of deciduous teeth        | Ferreira SH, Béria JU, Kramer PF, Feldens EG, Feldens CA. Dental caries in 0- to 5-year-old Brazilian children: prevalence, severity, and associated factors. . 2007; 17(4): 289-96.                                                                            |            | 2005-2006 | Scientific literature |
| Caries of deciduous teeth        | Leite IC, Ribeiro RA. Dental caries in the primary dentition in public nursery school children in Juiz de Fora, Minas Gerais, Brazil. . 2000; 16(3): 717-22.                                                                                                    |            | 1998      | Scientific literature |
| Caries of deciduous teeth        | Mattos-Graner R de O, Rontani RM, Gavião MB, Botatto HA. Caries prevalence in 6-36-month-old Brazilian children. . 1996; 13(2): 96-8.                                                                                                                           |            | 1994-1995 | Scientific literature |
| Caries of deciduous teeth        | Bönecker M, Marceles W, Sheiham A. Caries reductions between 1995, 1997 and 1999 in preschool children in Diadema, Brazil. . 2002; 12(3): 183-8.                                                                                                                |            | 1995-1999 | Scientific literature |
| Caries of deciduous teeth        | Piovesan C, Mendes FM, Ferreira FV, Guedes RS, Ardenghi TM. Socioeconomic inequalities in the distribution of dental caries in Brazilian preschool children. . 2010; 70(4): 319-26.                                                                             |            | 2008-2009 | Scientific literature |
| Caries of deciduous teeth        | Gradella CMF, Bernabé E, Bönecker M, Oliveira LB. Caries prevalence and severity, and quality of life in Brazilian 2- to 4-year-old children. . 2011; 39(6): 498-504.                                                                                           |            | 2008-2010 | Scientific literature |
| Caries of deciduous teeth        | Goes PS, Watt R, Hardy RG, Sheiham A. The prevalence and severity of dental pain in 14-15 year old Brazilian schoolchildren. . 2007; 24(4): 217-24.                                                                                                             | Pernambuco | 2004-2006 | Scientific literature |
| Caries of deciduous teeth        | Parisotto TM, Steiner-Oliveira C, De Souza-E-Silva CM, Peres RCR, Rodrigues LKA, Nobre-Dos-Santos M. Assessment of cavitated and active non-cavitated caries lesions in 3- to 4-year-old preschool children: a field study. . 2012; 22(2): 92-9.                |            | 2010-2011 | Scientific literature |
| Caries of deciduous teeth        | Campos JAB, Mielanda EA, Antunes J da S, Foschini ALR. Dental caries and the nutritional status of preschool children: a spatial analysis. . 2011; 16(10): 4161-8.                                                                                              |            | 2006-2007 | Scientific literature |
| Caries of deciduous teeth        | Fortes FDS, Martins RJ, Saliba Moimaz SA, das Saliba Garbin CA, das Saliba NA. Dental caries in preschool children in BIlac, Brazil. . 2005; 119(6): 556-7.                                                                                                     |            | 2003-2004 | Scientific literature |
| Caries of permanent teeth        | Bastos RS, Silva RPR, Mala-Junior AF, Carvalho FS, Merlini S, Caldana ML, Lauris JRP, Bastos JRM. Dental caries profile in Monte Negro, Amazonian state of Rondônia, Brazil, in 2008. . 2010; 18(5): 437-41.                                                    |            | 2007-2008 | Scientific literature |
| Caries of permanent teeth        | Jamelli SR, Rodrigues CS, de Lira PI. Nutritional status and prevalence of dental caries among 12-year-old children at public schools: a case-control study. . 2010; 8(1): 77-84.                                                                               |            | 2001      | Scientific literature |
| Caries of permanent teeth        | Piovesan C, Mendes FM, Antunes JLF, Ardenghi TM. Inequalities in the distribution of dental caries among 12-year-old Brazilian schoolchildren. . 2011; 25(1): 69-75.                                                                                            |            | 2008-2009 | Scientific literature |
| Caries of permanent teeth        | Traebert J, Jinbo Y, de Lacerda JT. Association between maternal schooling and caries prevalence: a cross-sectional study in southern Brazil. . 2011; 9(1): 47-52.                                                                                              |            | 2006      | Scientific literature |
| Caries of permanent teeth        | Narvai PC, Castellanos RA, Frazão P. Dental caries prevalence in permanent teeth of schoolchildren in Brazil, 1970-1996. . 2000; 34(2): 196-200.                                                                                                                |            | 1986-1996 | Scientific literature |
| Caries of permanent teeth        | Mendes LGA, Biazevic MGH, Michael-Crosato E, Mendes MOA. Dental caries and associated factors among Brazilian adolescents: a longitudinal study. . 2008; 7(26): 1614-9.                                                                                         |            | 2001-2005 | Scientific literature |
| Caries of permanent teeth        | Benazzi AS, da Silva RP, de Meneghim M, Ambrosano GM, Pereira AC. Dental caries and fluorosis prevalence and their relationship with socioeconomic and behavioural variables among 12-year-old schoolchildren. . 2012; 10(1): 65-73.                            |            | 2007      | Scientific literature |
| Caries of permanent teeth        | Assessment of caries experience in 12-year-old adolescents in Piracicaba, Sao Paulo, Brazil. . 2010; 8(4): 361-7.                                                                                                                                               |            | 2008-2009 | Scientific literature |
| Caries of permanent teeth        | Pitanga Fernandes ET, Duarte Vargas AM, Oliveira AC, Camargo da Rosa MA, Dutra Lucas S, Ferreira E Ferreira E. Factors related to dental caries in adolescents in southeastern Brazil. . 2010; 11(4): 165-70.                                                   |            | 2008      | Scientific literature |
| Caries of permanent teeth        | Jeremias F, de Souza JF, Silva CM da C, Cordeiro R de CL, Zuanon ACC, Santos-Pinto L. Dental caries experience and Molar-incisor Hypomineralization. . 2013; 71(3-4): 870-6.                                                                                    |            | 2011-2012 | Scientific literature |
| Periodontal diseases             | Silva-Boghossian CM, Luiz R, Colombo AP. Risk indicators for increased periodontal probing depth in subjects attending a public dental school in Brazil. . 2011; 9(3): 289-99.                                                                                  |            | 2005-2008 | Scientific literature |
| Periodontal diseases             | Susin C, Valle P, Oppermann RV, Haugejorden O, Albandar JM. Occurrence and risk indicators of increased probing depth in an adult Brazilian population. . 2005; 32(2): 123-9.                                                                                   |            | 2001      | Scientific literature |
| Periodontal diseases             | Dimi EL, Guimarães LO. Periodontal conditions and treatment needs (CPITN) in a worker population in Araraquara, SP, Brazil. . 1994; 44(4): 309-11.                                                                                                              |            | 1992-1993 | Scientific literature |
| Periodontal diseases             | Flores-de-Jacoby L, Bruchmann S, Mengel R, Zafiropoulos GG. Periodontal conditions in Rio de Janeiro City (Brazil) using the CPITN. . 1991; 19(2): 127-8.                                                                                                       |            | 1988      | Scientific literature |
| Periodontal diseases             | reported measures for prediction of periodontitis in a sample of Brazilians. . 2011; 82(12): 1693-704.                                                                                                                                                          |            | 2009-2010 | Scientific literature |
| Periodontal diseases             | Susin C, Vecchia CFD, Oppermann RV, Haugejorden O, Albandar JM. Periodontal Attachment Loss in an Urban Population of Brazilian Adults: Effect of Demographic, Behavioral, and Environmental Risk Indicators. . 2004; 75(7): 1033-41.                           |            | 2001      | Scientific literature |
| Periodontal diseases             | Gaio EJ, Haas AN, Carrard VC, Oppermann RV, Albandar J, Susin C. Oral health status in elders from South Brazil: a population-based study. . 2012; 29(3): 214-23.                                                                                               |            | 2009-2010 | Scientific literature |
| Periodontal diseases             | Susin C, Haas AN, Valle PM, Oppermann RV, Albandar JM. Prevalence and risk indicators for chronic periodontitis in adolescents and young adults in south Brazil. . 2011; 38(4): 326-33.                                                                         |            | 2001      | Scientific literature |
| Periodontal diseases             | Frias AC, Antunes JLF, Frattucci MVB, Zilbovicic C, Junqueira SR, de Souza SF, Yassuf EM. [Population based study on periodontal conditions and socioeconomic determinants in adults in the city of Guarulhos (SP), Brazil, 2006]. . 2011; 14(3): 495-507.      |            | 2006      | Scientific literature |
| Edentulism and severe tooth loss | Gaio EJ, Haas AN, Carrard VC, Oppermann RV, Albandar J, Susin C. Oral health status in elders from South Brazil: a population-based study. . 2012; 29(3): 214-23.                                                                                               |            | 2001      | Scientific literature |
| Edentulism and severe tooth loss | Brazil World Health Survey 2003                                                                                                                                                                                                                                 | Country    | 2003      | Survey                |
| Edentulism and severe tooth loss | Susin C, Valle P, Oppermann RV, Haugejorden O, Albandar JM. Occurrence and risk indicators of increased probing depth in an adult Brazilian population. . 2005; 32(2): 123-9.                                                                                   |            | 2001      | Scientific literature |
| Edentulism and severe tooth loss | Paula AMB. Analysis of the normative conditions of oral health, depression and serotonin-transporter-linked promoter region polymorphisms in an elderly population. . 2013; 13(1): 98-106.                                                                      |            | 2011      | Scientific literature |
| Edentulism and severe tooth loss | Rodrigues SM, Oliveira AC, Vargas AMD, Moreira AN, E Ferreira EF. Implications of edentulism on quality of life among elderly. . 2012; 9(1): 100-9.                                                                                                             |            | 2010      | Scientific literature |
| Edentulism and severe tooth loss | Miranda L de P, Silveira MF, Oliveira TL, Alves SFF, Júnior HM, Batista AUD, Bonan PRF. Cognitive impairment, the Mini-Mental State Examination and socio-demographic and dental variables in the elderly in Brazil. . 2012; 29(2): e34-40.                     |            | 2008-2009 | Scientific literature |
| Edentulism and severe tooth loss | Ribeiro MTF, Rosa MAC da, Lima RMN de, Vargas AMD, Haddad JPA, Ferreira E Ferreira E. Edentulism and shortened dental arch in Brazilian elderly from the National Survey of Oral Health 2003. . 2011; 45(5): 817-23.                                            |            | 2002-2003 | Scientific literature |
| Edentulism and severe tooth loss | Tórtres LH do N, da Silva DD, Neri AL, Hilgert JB, Hugo FN, Sousa M da LR de. Association between underweight and overweight/obesity with oral health among independently living Brazilian elderly. . 2013; 29(1): 152-7.                                       |            | 2008-2009 | Scientific literature |
| Edentulism and severe tooth loss | by oral health problems in adults and the elderly in a southeastern Brazilian city]. . 2012; 17(2): 397-406.                                                                                                                                                    |            | 2008      | Scientific literature |
| Edentulism and severe tooth loss | Moreira R de S, Nico LS, Tomita NE. [Spatial risk and factors associated with edentulism among elderly persons in Southeast Brazil]. . 2011; 27(10): 2041-54.                                                                                                   |            | 2005      | Scientific literature |
| Edentulism and severe tooth loss | De Andrade FB, Lebrão ML, Santos JLF, Duarte YA de O. Relationship between oral health and frailty in community-dwelling elderly individuals in Brazil. . 2013; 61(5): 809-14.                                                                                  |            | 2006      | Scientific literature |
| Edentulism and severe tooth loss | Brazilian Institute of Geography and Statistics (IBGE), Ministry of Health (Brazil), Secretariat of Health Surveillance, Ministry of Health (Brazil). Brazil National Oral Health Survey 2010. Rio de Janeiro, Brazil: Ministry of Health (Brazil).             | Country    | 2010      | Survey                |
| Edentulism and severe tooth loss | De Marchi RJ, Hugo FN, Hilgert JB, Padilha DMP. Association between number of teeth, edentulism and use of dentures with percentage body fat in south Brazilian community-dwelling older people. . 2012; 29(2): e69-76.                                         |            | 2006      | Scientific literature |
| Edentulism and severe tooth loss | Rihs LB, Silva DD da, Sousa M da LR de. Dental caries and tooth loss in adults in a Brazilian southeastern state. . 2009; 17(5): 392-6.                                                                                                                         |            | 2007      | Scientific literature |
| Edentulism and severe tooth loss | Cardoso EM, Parente RCP, Vettore MV, Rebelo MAB. Oral health conditions of elderly residents in the city of Manaus, Amazonas: estimates by sex. . 2011; 14(1): 131-40.                                                                                          |            | 2007      | Scientific literature |
| Edentulism and severe tooth loss | Corraini P, Baelum V, Pannuti CM, Pustigliani AN, Romito GA, Pustigliani FE. Periodontal attachment loss in an untreated isolated population of Brazil. . 2008; 79(4): 610-20.                                                                                  |            | 2005-2006 | Scientific literature |
| Injuries                         | Centre for Research on the Epidemiology of Disasters (CRED). EM-DAT: The OFDA/CRED International Disaster Database. Brussels, Belgium: Catholic University of Leuven.                                                                                           | Global     | 1964-2015 | Estimate              |
| Road injuries                    | Ministry of Health (Brazil). Brazil Hospital Information System 1997. Rio de Janeiro, Brazil: Ministry of Health (Brazil).                                                                                                                                      | Country    | 1993-1997 | Administrative record |
| Road injuries                    | Ministry of Health (Brazil). Brazil Hospital Information System 2008-2012.                                                                                                                                                                                      |            | 2008-2012 | Administrative record |
| Road injuries                    | Ministry of Health (Brazil). Brazil Hospital Information System 2013-2014.                                                                                                                                                                                      |            | 2013-2017 | Administrative record |
| Road injuries                    | Brazilian Institute of Geography and Statistics (IBGE), Ministry of Health (Brazil), Ministry of Planning, Budget, and Management (Brazil). Brazil National Health Survey 2013. Rio de Janeiro, Brazil: Brazilian Institute of Geography and Statistics (IBGE). | Country    | 2013-2014 | Survey                |
| Road injuries                    | Ministry of Health (Brazil). Brazil Hospital Information System 2003-2007.                                                                                                                                                                                      |            | 2003-2007 | Administrative record |
| Road injuries                    | Brazil World Health Survey 2003                                                                                                                                                                                                                                 | Country    | 2002-2003 | Survey                |
| Road injuries                    | Ministry of Health (Brazil). Brazil Hospital Information System 1998-2002.                                                                                                                                                                                      |            | 1998-2002 | Administrative record |
| Road injuries                    | Health Institute (São Paulo, Brazil), State University of Campinas, São Paulo Municipal Health Department, São Paulo State University, University of São Paulo. Brazil - São Paulo Health Survey 2008-2009.                                                     | São Paulo  | 2002-2008 | Survey                |
| Pedestrian road injuries         | Ministry of Health (Brazil). Brazil Hospital Information System 2003-2007.                                                                                                                                                                                      |            | 2003-2007 | Administrative record |









|                                   |                                                                                                                                                                                                                                                                 |           |           |                       |
|-----------------------------------|-----------------------------------------------------------------------------------------------------------------------------------------------------------------------------------------------------------------------------------------------------------------|-----------|-----------|-----------------------|
| Physical violence by firearm      | Brazilian Institute of Geography and Statistics (IBGE), Ministry of Health (Brazil), Ministry of Planning, Budget, and Management (Brazil). Brazil National Health Survey 2013. Rio de Janeiro, Brazil: Brazilian Institute of Geography and Statistics (IBGE). | Country   | 2013-2014 | Survey                |
| Physical violence by firearm      | Ministry of Health (Brazil). Brazil Hospital Information System 2003-2007.                                                                                                                                                                                      |           | 2003-2007 | Administrative record |
| Physical violence by firearm      | Ministry of Health (Brazil). Brazil Hospital Information System 2013-2014.                                                                                                                                                                                      |           | 2013-2017 | Administrative record |
| Physical violence by firearm      | Ministry of Health (Brazil). Brazil Hospital Information System 1997. Rio de Janeiro, Brazil: Ministry of Health (Brazil).                                                                                                                                      | Country   | 1993-1997 | Administrative record |
| Physical violence by firearm      | Health Institute (São Paulo, Brazil), State University of Campinas, São Paulo Municipal Health Department, São Paulo State University, University of São Paulo. Brazil - São Paulo Health Survey 2008-2009.                                                     | São Paulo | 2002-2008 | Survey                |
| Physical violence by firearm      | Brazil World Health Survey 2003                                                                                                                                                                                                                                 | Country   | 2002-2003 | Survey                |
| Physical violence by sharp object | Ministry of Health (Brazil). Brazil Hospital Information System 2003-2007.                                                                                                                                                                                      |           | 2003-2007 | Administrative record |
| Physical violence by sharp object | Ministry of Health (Brazil). Brazil Hospital Information System 2013-2014.                                                                                                                                                                                      |           | 2013-2017 | Administrative record |
| Physical violence by sharp object | Ministry of Health (Brazil). Brazil Hospital Information System 1997. Rio de Janeiro, Brazil: Ministry of Health (Brazil).                                                                                                                                      | Country   | 1993-1997 | Administrative record |
| Physical violence by sharp object | Ministry of Health (Brazil). Brazil Hospital Information System 2008-2012.                                                                                                                                                                                      |           | 2008-2012 | Administrative record |
| Physical violence by sharp object | Ministry of Health (Brazil). Brazil Hospital Information System 1998-2002.                                                                                                                                                                                      |           | 1998-2002 | Administrative record |
| Physical violence by sharp object | Brazil World Health Survey 2003                                                                                                                                                                                                                                 | Country   | 2002-2003 | Survey                |
| Physical violence by sharp object | Brazilian Institute of Geography and Statistics (IBGE), Ministry of Health (Brazil), Ministry of Planning, Budget, and Management (Brazil). Brazil National Health Survey 2013. Rio de Janeiro, Brazil: Brazilian Institute of Geography and Statistics (IBGE). | Country   | 2013-2014 | Survey                |
| Physical violence by sharp object | Health Institute (São Paulo, Brazil), State University of Campinas, São Paulo Municipal Health Department, São Paulo State University, University of São Paulo. Brazil - São Paulo Health Survey 2008-2009.                                                     | São Paulo | 2002-2008 | Survey                |
| Physical violence by other means  | Brazilian Institute of Geography and Statistics (IBGE), Ministry of Health (Brazil), Ministry of Planning, Budget, and Management (Brazil). Brazil National Health Survey 2013. Rio de Janeiro, Brazil: Brazilian Institute of Geography and Statistics (IBGE). | Country   | 2013-2014 | Survey                |
| Physical violence by other means  | Ministry of Health (Brazil). Brazil Hospital Information System 2003-2007.                                                                                                                                                                                      |           | 2003-2007 | Administrative record |
| Physical violence by other means  | Brazil World Health Survey 2003                                                                                                                                                                                                                                 | Country   | 2002-2003 | Survey                |
| Physical violence by other means  | Health Institute (São Paulo, Brazil), State University of Campinas, São Paulo Municipal Health Department, São Paulo State University, University of São Paulo. Brazil - São Paulo Health Survey 2008-2009.                                                     | São Paulo | 2002-2008 | Survey                |
| Physical violence by other means  | Ministry of Health (Brazil). Brazil Hospital Information System 2008-2012.                                                                                                                                                                                      |           | 2008-2012 | Administrative record |
| Physical violence by other means  | Ministry of Health (Brazil). Brazil Hospital Information System 1998-2002.                                                                                                                                                                                      |           | 1998-2002 | Administrative record |
| Physical violence by other means  | Ministry of Health (Brazil). Brazil Hospital Information System 2013-2014.                                                                                                                                                                                      |           | 2013-2017 | Administrative record |
| Physical violence by other means  | Ministry of Health (Brazil). Brazil Hospital Information System 1997. Rio de Janeiro, Brazil: Ministry of Health (Brazil).                                                                                                                                      | Country   | 1993-1997 | Administrative record |
| None                              | Brazil World Health Survey 2003                                                                                                                                                                                                                                 | Country   | 2002-2003 | Survey                |
| None                              | World Health Organization (WHO). WHO Tuberculosis Case Notifications. Geneva, Switzerland: World Health Organization (WHO).                                                                                                                                     | Global    | 2003-2014 | Epi surveillance      |
| None                              | Brazilian Institute of Geography and Statistics (IBGE), Ministry of Health (Brazil), Ministry of Planning, Budget, and Management (Brazil). Brazil National Health Survey 2013. Rio de Janeiro, Brazil: Brazilian Institute of Geography and Statistics (IBGE). | Country   | 2013-2014 | Survey                |
| None                              | Health Institute (São Paulo, Brazil), State University of Campinas, São Paulo Municipal Health Department, São Paulo State University, University of São Paulo. Brazil - São Paulo Health Survey 2008-2009.                                                     | São Paulo | 2002-2008 | Survey                |

Appendix Table 3: Data used in Brazil risk estimates, GBD 2016

| Risk                                     | Citation                                                                                                                                                                                                                            | Coverage                                                                                                                                                                                           | Years     | Data Type             |
|------------------------------------------|-------------------------------------------------------------------------------------------------------------------------------------------------------------------------------------------------------------------------------------|----------------------------------------------------------------------------------------------------------------------------------------------------------------------------------------------------|-----------|-----------------------|
| Unsafe sanitation                        | Brazilian Society for Family Welfare (BEMFAM), Westinghouse; Institute for Resource Development. Brazil Demographic and Health Survey 1986. Columbia, United States: Westinghouse; Institute for Resource Development.              | Country                                                                                                                                                                                            | 1986      | Survey                |
| Unsafe sanitation                        | Brazilian Institute of Geography and Statistics (IBGE). Brazil National Household Sample Survey 2013. Rio de Janeiro, Brazil: Brazilian Institute of Geography and Statistics (IBGE). Brazil National Household Sample Survey 2013. | Country                                                                                                                                                                                            | 2013      | Survey                |
| Unsafe sanitation                        | Brazilian Institute of Geography and Statistics (IBGE). Brazil National Household Sample Survey 2012. Rio de Janeiro, Brazil: Brazilian Institute of Geography and Statistics (IBGE). Brazil National Household Sample Survey 2012. | Country                                                                                                                                                                                            | 2012      | Survey                |
| Unsafe sanitation                        | Brazilian Institute of Geography and Statistics (IBGE). Brazil National Household Sample Survey 2011. Rio de Janeiro, Brazil: Brazilian Institute of Geography and Statistics (IBGE). Brazil National Household Sample Survey 2011. | Country                                                                                                                                                                                            | 2011      | Survey                |
| Unsafe sanitation                        | Brazil Demographic Census 2010 - IPUMS                                                                                                                                                                                              | Country                                                                                                                                                                                            | 2010      | Census                |
| Unsafe sanitation                        | Brazil General Census 1980 - IPUMS                                                                                                                                                                                                  | Country                                                                                                                                                                                            | 1980      | Census                |
| Unsafe sanitation                        | Brazil General Census 1991 - IPUMS                                                                                                                                                                                                  | Country                                                                                                                                                                                            | 1991      | Census                |
| Unsafe sanitation                        | Brazil World Health Survey 2003                                                                                                                                                                                                     | Country                                                                                                                                                                                            | 2003      | Survey                |
| Unsafe sanitation                        | Brazilian Society for Family Welfare (BEMFAM), Macro International, Inc. Brazil Demographic and Health Survey 1996. Calverton, United States: Macro International, Inc. Brazil Demographic and Health Survey 1996.                  | Country                                                                                                                                                                                            | 1996      | Survey                |
| Unsafe sanitation                        | Brazilian Society for Family Welfare (BEMFAM), Macro International, Inc. Brazil Demographic and Health Survey 1991. Calverton, United States: Macro International, Inc. Brazil Demographic and Health Survey 1991.                  | Country                                                                                                                                                                                            | 1991      | Survey                |
| Unsafe sanitation                        | Brazil General Census 2000 - IPUMS                                                                                                                                                                                                  | Country                                                                                                                                                                                            | 2000      | Census                |
| Air pollution                            | Brazil Air Quality Platform Database 2000-2014 as it appears in World Health Organization (WHO). WHO Urban Ambient Air Pollution Database Draft 2016.                                                                               | Country                                                                                                                                                                                            | 2014      | Natural phenomena     |
| Air pollution                            | Brazil - Curitiba Metropolitan Area Air Quality Annual Report 2012 as it appears in World Health Organization (WHO). WHO Urban Ambient Air Pollution Database Draft 2016.                                                           | Paraná                                                                                                                                                                                             | 2012      | Report                |
| Ambient particulate matter pollution     | Brazil Air Quality Platform Database 2000-2014 as it appears in World Health Organization (WHO). WHO Urban Ambient Air Pollution Database Draft 2016.                                                                               | Country                                                                                                                                                                                            | 2014      | Natural phenomena     |
| Ambient particulate matter pollution     | Brazil - Curitiba Metropolitan Area Air Quality Annual Report 2012 as it appears in World Health Organization (WHO). WHO Urban Ambient Air Pollution Database Draft 2016.                                                           | Paraná                                                                                                                                                                                             | 2012      | Report                |
| Household air pollution from solid fuels | Brazil World Health Survey 2003                                                                                                                                                                                                     | Country                                                                                                                                                                                            | 2003      | Survey                |
| Household air pollution from solid fuels | Brazil General Census 1991 - IPUMS                                                                                                                                                                                                  | Country                                                                                                                                                                                            | 1991      | Census                |
| Household air pollution from solid fuels | Brazil General Census 1980 - IPUMS                                                                                                                                                                                                  | Country                                                                                                                                                                                            | 1980      | Census                |
| Household air pollution from solid fuels | Brazil Living Standards Measurement Survey 1996-1997                                                                                                                                                                                | Ceará, Espírito Santo, Maranhão, Minas Gerais, Paraíba, Pernambuco, Piauí, Rio Grande do Norte, Rio de Janeiro, Sergipe, São Paulo, Alagoas, Bahia, Ceará, Espírito Santo, Maranhão, Minas Gerais, | 1996      | Survey                |
| Household air pollution from solid fuels | Brazilian Institute of Geography and Statistics (IBGE). Brazil National Household Sample Survey 1999. Rio de Janeiro, Brazil: Brazilian Institute of Geography and Statistics (IBGE). Brazil National Household Sample Survey 1999. | Country                                                                                                                                                                                            | 1999      | Survey                |
| Residential radon                        | de Araujo GC, Mourao NT, Pinheiro IN, Xavier AR, Gameiro VS. Lead Toxicity Risks in Gunshot Victims. . 2015; 10(10): e0140220.                                                                                                      |                                                                                                                                                                                                    | 2000-2005 | Scientific literature |
| Lead exposure                            | Associated factors for higher lead and cadmium blood levels, and reference values derived from general population of Sao Paulo, Brazil. . 2016; 543(Pt A): 628-35.                                                                  |                                                                                                                                                                                                    | 2014      | Scientific literature |
| Lead exposure                            | Carvalho SR, Alvarenga AL, Rezende MI, Figueiroa GA, Leite VG, Gutierrez AC, Lobo BC, Cascales RA. [Reference values for lead in blood in urban population in southern Brazil]. . 2001; 9(5): 315-9.                                |                                                                                                                                                                                                    | 2007      | Scientific literature |
| Lead exposure                            | de Araujo GC, Mourao NT, Pinheiro IN, Xavier AR, Gameiro VS. Lead Toxicity Risks in Gunshot Victims. . 2015; 10(10): e0140220.                                                                                                      |                                                                                                                                                                                                    | 1995      | Scientific literature |
| Lead exposure                            | Ferron MM, Lima AK de, Saldiva PHN, Gouveia N. Environmental lead poisoning among children in Porto Alegre state, Southern Brazil. . 2012; 46(2): 226-33.                                                                           |                                                                                                                                                                                                    | 2014      | Scientific literature |
| Lead exposure                            | Freire C, Koifman RJ, Fujimoto D, de Oliveira Souza VC, Barbosa F, Koifman S. Reference values of lead in blood and related factors among blood donors in the Western Amazon, Brazil. . 2014; 77(8): 426-40.                        |                                                                                                                                                                                                    | 2006      | Scientific literature |
| Lead exposure                            | Moura M, Goncalves Valente J. Blood lead levels during pregnancy in women living in Rio de Janeiro, Brazil. . 2002; 299(1-3): 123-9.                                                                                                |                                                                                                                                                                                                    | 2010      | Scientific literature |
| Lead exposure                            | Ferron MM, Lima AK de, Saldiva PHN, Gouveia N. Environmental lead poisoning among children in Porto Alegre state, Southern Brazil. . 2012; 46(2): 226-33.                                                                           |                                                                                                                                                                                                    | 1996      | Scientific literature |
| Lead exposure                            | Freire C, Koifman RJ, Fujimoto D, de Oliveira Souza VC, Barbosa F, Koifman S. Reference values of lead in blood and related factors among blood donors in the Western Amazon, Brazil. . 2014; 77(8): 426-40.                        |                                                                                                                                                                                                    | 2006      | Scientific literature |
| Lead exposure                            |                                                                                                                                                                                                                                     |                                                                                                                                                                                                    | 2010      | Scientific literature |

|                                    |                                                                                                                                                                                                                                                                                                                     |        |           |                       |
|------------------------------------|---------------------------------------------------------------------------------------------------------------------------------------------------------------------------------------------------------------------------------------------------------------------------------------------------------------------|--------|-----------|-----------------------|
| Lead exposure                      | Associated factors for higher lead and cadmium blood levels, and reference values derived from general population of Sao Paulo, Brazil. . 2016; 543(Pt A): 628-35.                                                                                                                                                  |        | 2007      | Scientific literature |
| Lead exposure                      | Romieu I, Lacasana M, McConnell R. Lead exposure in Latin America and the Caribbean. Lead Research Group of the Pan-American Health Organization. . Paoliello MMB, De Capitani EM. Occupational and environmental human lead exposure in Brazil. . 2007; 103(2): 288-97.                                            |        | 1983      | Scientific literature |
| Lead exposure                      | Paoliello MMB, De Capitani EM. Occupational and environmental human lead exposure in Brazil. . 2007; 103(2): 288-97.                                                                                                                                                                                                |        | 1998      | Scientific literature |
| Lead exposure                      | Cordeiro R, Lima Filho EC, Salgado PE, Santos CO, Constantino L, Malatesta ML. [Neurological disorders in workers with low levels of lead in the blood. II-- Neuropsychological disorders]. . 1996; 30(4): 358-63.                                                                                                  |        | 1998      | Scientific literature |
| Lead exposure                      | Cordeiro R, Lima Filho EC, Salgado PE, Santos CO, Constantino L, Malatesta ML. [Neurological disorders in workers with low levels of lead in the blood. II-- Neuropsychological disorders]. . 1996; 30(4): 358-63.                                                                                                  |        | 1996      | Scientific literature |
| Lead exposure                      | Dos Santos AC, Colacciopo S, Dal Bó CM, dos Santos NA. Occupational exposure to lead, kidney function tests, and blood pressure. . 1994; 26(5): 635-43.                                                                                                                                                             |        | 1994      | Scientific literature |
| Lead exposure                      | Dos Santos AC, Colacciopo S, Dal Bó CM, dos Santos NA. Occupational exposure to lead, kidney function tests, and blood pressure. . 1994; 26(5): 635-43.                                                                                                                                                             |        | 1994      | Scientific literature |
| Lead exposure                      | Nogueira DP, Colacciopo S, de Souza JM, Pezza CB, de Souza ML, Gomes JR. [Lead level in a sample of "non-exposed" volunteers living in greater São Paulo, Nogueira DP, Colacciopo S, de Souza JM, Pezza CB, de Souza ML, Gomes JR. [Lead level in a sample of "non-exposed" volunteers living in greater São Paulo, |        | 1976      | Scientific literature |
| Lead exposure                      | Romieu I, Lacasana M, McConnell R. Lead exposure in Latin America and the Caribbean. Lead Research Group of the Pan-American Health Organization. .                                                                                                                                                                 |        | 1983      | Scientific literature |
| Lead exposure                      | de Almeida Lopes AC, Navas-Acien A, Zamoiski R, Silbergeld EK, Carvalho Mde F, Buzzo ML, Urbano MR, Martins Ada C, Paoliello MM. Risk factors for lead exposure in adult population in southern Brazil. . 2015; 78(2): 92-108.                                                                                      |        | 2011      | Scientific literature |
| Lead exposure                      | de Almeida Lopes AC, Navas-Acien A, Zamoiski R, Silbergeld EK, Carvalho Mde F, Buzzo ML, Urbano MR, Martins Ada C, Paoliello MM. Risk factors for lead exposure in adult population in southern Brazil. . 2015; 78(2): 92-108.                                                                                      |        | 2011      | Scientific literature |
| Lead exposure                      | Moura M, Goncalves Valente J. Blood lead levels during pregnancy in women living in Rio de Janeiro, Brazil. . 2002; 299(1-3): 123-9.                                                                                                                                                                                |        | 1996      | Scientific literature |
| Lead exposure                      | Alvarenga AL, Carvalho SR, Figueiroa GA, Leite VG, Gutierrez AC, Nogueira KB, Inamine WA, Zavatti AM. [Reference values for lead levels in blood for the urban population]. . 1997; 31(2): 144-8.                                                                                                                   |        | 1994      | Scientific literature |
| Lead exposure                      | Alvarenga AL, Carvalho SR, Figueiroa GA, Leite VG, Gutierrez AC, Nogueira KB, Inamine WA, Zavatti AM. [Reference values for lead levels in blood for the urban population]. . 1997; 31(2): 144-8.                                                                                                                   |        | 1994      | Scientific literature |
| Lead exposure                      | Carvalho SR, Alvarenga AL, Rezende MI, Figueiroa GA, Leite VG, Gutierrez AC, Lobo BC, Cascales RA. [Reference values for lead in blood in urban population in southern Brazil]. . 2001; 9(5): 315-9.                                                                                                                |        | 1995      | Scientific literature |
| Occupational risks                 | International Labour Organization (ILO). International Labour Organization Database (ILOSTAT) - Employment by Sex and Economic Activity. International                                                                                                                                                              | Global | 1981-2014 | Estimate              |
| Occupational risks                 | International Labour Organization (ILO). International Labour Organization Database (ILOSTAT) - Employment to Population Ratio. International Labour                                                                                                                                                                | Global | 2001-2015 | Estimate              |
| Occupational carcinogens           | International Labour Organization (ILO). International Labour Organization Database (ILOSTAT) - Employment to Population Ratio. International Labour                                                                                                                                                                | Global | 2001-2015 | Estimate              |
| Occupational carcinogens           | L, Prüss-Ustün A, Leigh J, Corvalan C. The global burden of selected occupational diseases and injury risks: Methodology and summary. . 2005; 48(6): 400-18.                                                                                                                                                        | Global | 1990-2010 | Scientific literature |
| Occupational carcinogens           | International Labour Organization (ILO). International Labour Organization Database (ILOSTAT) - Employment by Sex and Economic Activity. International                                                                                                                                                              | Global | 1981-2014 | Estimate              |
| Occupational exposure to asbestos  | International Labour Organization (ILO). International Labour Organization Database (ILOSTAT) - Employment by Sex and Economic Activity. International                                                                                                                                                              | Global | 1981-2014 | Estimate              |
| Occupational exposure to asbestos  | International Labour Organization (ILO). International Labour Organization Database (ILOSTAT) - Employment by Sex and Occupation. International Labour                                                                                                                                                              | Global | 2000-2009 | Estimate              |
| Occupational exposure to arsenic   | International Labour Organization (ILO). International Labour Organization Database (ILOSTAT) - Employment by Sex and Economic Activity. International                                                                                                                                                              | Global | 1981-2014 | Estimate              |
| Occupational exposure to arsenic   | International Labour Organization (ILO). International Labour Organization Database (ILOSTAT) - Employment by Sex and Occupation. International Labour                                                                                                                                                              | Global | 2000-2009 | Estimate              |
| Occupational exposure to benzene   | International Labour Organization (ILO). International Labour Organization Database (ILOSTAT) - Employment by Sex and Economic Activity. International                                                                                                                                                              | Global | 1981-2014 | Estimate              |
| Occupational exposure to benzene   | International Labour Organization (ILO). International Labour Organization Database (ILOSTAT) - Employment by Sex and Occupation. International Labour                                                                                                                                                              | Global | 2000-2009 | Estimate              |
| Occupational exposure to beryllium | International Labour Organization (ILO). International Labour Organization Database (ILOSTAT) - Employment by Sex and Economic Activity. International                                                                                                                                                              | Global | 1981-2014 | Estimate              |
| Occupational exposure to beryllium | International Labour Organization (ILO). International Labour Organization Database (ILOSTAT) - Employment by Sex and Occupation. International Labour                                                                                                                                                              | Global | 2000-2009 | Estimate              |
| Occupational exposure to cadmium   | International Labour Organization (ILO). International Labour Organization Database (ILOSTAT) - Employment by Sex and Economic Activity. International                                                                                                                                                              | Global | 1981-2014 | Estimate              |
| Occupational exposure to cadmium   | International Labour Organization (ILO). International Labour Organization Database (ILOSTAT) - Employment by Sex and Occupation. International Labour                                                                                                                                                              | Global | 2000-2009 | Estimate              |



|                   |                                                                                                                                                                                                                            |                                                                                                                                                                                                    |           |                       |
|-------------------|----------------------------------------------------------------------------------------------------------------------------------------------------------------------------------------------------------------------------|----------------------------------------------------------------------------------------------------------------------------------------------------------------------------------------------------|-----------|-----------------------|
| Child underweight | Opinion and Statistics (IBOPE), Ministry of Health (Brazil). Brazil National Demographic and Health Survey of Children and Women 2006-2007. Rio de Janeiro, Brazil: Ministry of Health (Brazil).                           | Country                                                                                                                                                                                            | 2006-2007 | Survey                |
| Child underweight | months, Niterói, Brazil as it appears in World Health Organization (WHO). WHO Global Database on Child Growth and Malnutrition - Historical. Geneva, Switzerland: World Health Organization (WHO).                         |                                                                                                                                                                                                    | 1995      | Scientific literature |
| Child underweight | Brazil Consumer Expenditure Survey 2002-2003 as it appears in World Health Organization (WHO). WHO Global Database on Child Growth and Malnutrition. Geneva, Switzerland: World Health Organization (WHO).                 | Country                                                                                                                                                                                            | 2002      | Survey                |
| Child underweight | National Health and Nutrition Survey as it appears in World Health Organization (WHO). WHO Global Database on Child Growth and Malnutrition. Geneva, Switzerland: World Health Organization (WHO).                         | Country                                                                                                                                                                                            | 1989      | Report                |
| Child underweight | Guatemala Reproductive Health Survey 2002 as it appears in World Health Organization (WHO). WHO Global Database on Child Growth and Malnutrition. Geneva, Switzerland: World Health Organization (WHO).                    | Country                                                                                                                                                                                            | 2002      | Survey                |
| Child underweight | appears in World Health Organization (WHO). WHO Global Database on Child Growth and Malnutrition - Historical. Geneva, Switzerland: World Health Organization (WHO).                                                       | Country                                                                                                                                                                                            | 1987-1991 | Report                |
| Child underweight | Brazilian Society for Family Welfare (BEMFAM), Macro International, Inc. Brazil Demographic and Health Survey 1996. Calverton, United States: Macro                                                                        | Country                                                                                                                                                                                            | 1996      | Survey                |
| Child underweight | Mexico National Nutrition Survey in Rural Areas 1989 as it appears in World Health Organization (WHO). WHO Global Database on Child Growth and Malnutrition. Geneva, Switzerland: World Health Organization (WHO).         | Country                                                                                                                                                                                            | 1989      | Survey                |
| Child underweight | Brazilian Society for Family Welfare (BEMFAM), Westinghouse; Institute for Resource Development. Brazil Demographic and Health Survey 1986. Columbia, United States: Westinghouse; Institute for Resource Development.     | Country                                                                                                                                                                                            | 1986      | Survey                |
| Child underweight | Brazil Living Standards Measurement Survey 1996-1997                                                                                                                                                                       | Ceará, Espírito Santo, Maranhão, Minas Gerais, Paraíba, Pernambuco, Piauí, Rio Grande do Norte, Rio de Janeiro, Sergipe, São Paulo, Alagoas, Bahia, Ceará, Espírito Santo, Maranhão, Minas Gerais, | 1996-1997 | Survey                |
| Child underweight | Guinea-Bissau SMART Nutrition Survey 2008 as it appears in World Health Organization (WHO). WHO Global Database on Child Growth and Malnutrition. Geneva, Switzerland: World Health Organization (WHO).                    | Country                                                                                                                                                                                            | 2008      | Survey                |
| Child underweight | Mexico National Nutrition Survey 1998-1999 as it appears in World Health Organization (WHO). WHO Global Database on Child Growth and Malnutrition. Geneva, Switzerland: World Health Organization (WHO).                   | Country                                                                                                                                                                                            | 1998      | Survey                |
| Child underweight | Brazil Demographic and Health Survey 1996 as it appears in World Health Organization (WHO). WHO Global Database on Child Growth and Malnutrition. Geneva, Switzerland: World Health Organization (WHO).                    | Country                                                                                                                                                                                            | 1996      | Survey                |
| Child wasting     | Mexico National Nutrition Survey in Rural Areas 1989 as it appears in World Health Organization (WHO). WHO Global Database on Child Growth and Malnutrition. Geneva, Switzerland: World Health Organization (WHO).         | Country                                                                                                                                                                                            | 1989      | Survey                |
| Child wasting     | Brazilian Society for Family Welfare (BEMFAM), Macro International, Inc. Brazil Demographic and Health Survey 1996. Calverton, United States: Macro                                                                        | Country                                                                                                                                                                                            | 1996      | Survey                |
| Child wasting     | Brazil Demographic and Health Survey 1996 as it appears in World Health Organization (WHO). WHO Global Database on Child Growth and Malnutrition. Geneva, Switzerland: World Health Organization (WHO).                    | Country                                                                                                                                                                                            | 1996      | Survey                |
| Child wasting     | children of the Aripuanã Park, Brazilian Amazon as it appears in World Health Organization (WHO). WHO Global Database on Child Growth and Malnutrition - Historical. Geneva, Switzerland: World Health Organization (WHO). |                                                                                                                                                                                                    | 1989      | Scientific literature |
| Child wasting     | Health Organization (WHO). WHO Global Database on Child Growth and Malnutrition - Historical. Geneva, Switzerland: World Health Organization (WHO).                                                                        | Country                                                                                                                                                                                            | 1989      | Survey                |

|                |                                                                                                                                                                                                                                                                                                           |                                                                                                                                                                                                    |           |                       |
|----------------|-----------------------------------------------------------------------------------------------------------------------------------------------------------------------------------------------------------------------------------------------------------------------------------------------------------|----------------------------------------------------------------------------------------------------------------------------------------------------------------------------------------------------|-----------|-----------------------|
|                |                                                                                                                                                                                                                                                                                                           | Ceará, Espírito Santo, Maranhão, Minas Gerais, Paraíba, Pernambuco, Piauí, Rio Grande do Norte, Rio de Janeiro, Sergipe, São Paulo, Alagoas, Bahia, Ceará, Espírito Santo, Maranhão, Minas Gerais, |           |                       |
| Child wasting  | Brazil Living Standards Measurement Survey 1996-1997                                                                                                                                                                                                                                                      |                                                                                                                                                                                                    | 1996-1997 | Survey                |
| Child wasting  | Mexico National Nutrition Survey 1998-1999 as it appears in World Health Organization (WHO). WHO Global Database on Child Growth and Malnutrition. Geneva, Switzerland: World Health Organization (WHO).                                                                                                  | Country                                                                                                                                                                                            | 1998      | Survey                |
| Child wasting  | Brazilian Society for Family Welfare (BEMFAM), Westinghouse; Institute for Resource Development. Brazil Demographic and Health Survey 1986. Columbia, United States: Westinghouse; Institute for Resource Development.                                                                                    | Country                                                                                                                                                                                            | 1986      | Survey                |
| Child wasting  | [Nutritional and feeding status of preschool children in the semi-arid region of Bahia (Brazil): I. Anthropometric assessment] as it appears in World Health Organization (WHO). WHO Global Database on Child Growth and Malnutrition - Historical. Geneva, Switzerland: World Health Organization (WHO). |                                                                                                                                                                                                    | 1989      | Scientific literature |
| Child wasting  | Guatemala Reproductive Health Survey 2002 as it appears in World Health Organization (WHO). WHO Global Database on Child Growth and Malnutrition. Geneva, Switzerland: World Health Organization (WHO).                                                                                                   | Country                                                                                                                                                                                            | 2002      | Survey                |
| Child wasting  | Guinea-Bissau SMART Nutrition Survey 2008 as it appears in World Health Organization (WHO). WHO Global Database on Child Growth and Malnutrition. Geneva, Switzerland: World Health Organization (WHO).                                                                                                   | Country                                                                                                                                                                                            | 2008      | Survey                |
| Child wasting  | appears in World Health Organization (WHO). WHO Global Database on Child Growth and Malnutrition - Historical. Geneva, Switzerland: World Health Organization (WHO).                                                                                                                                      | Country                                                                                                                                                                                            | 1987-1991 | Report                |
| Child wasting  | months, Niterói, Brazil as it appears in World Health Organization (WHO). WHO Global Database on Child Growth and Malnutrition - Historical. Geneva, Switzerland: World Health Organization (WHO).                                                                                                        |                                                                                                                                                                                                    | 1995      | Scientific literature |
| Child wasting  | Opinion and Statistics (IBOPE), Ministry of Health (Brazil). Brazil National Demographic and Health Survey of Children and Women 2006-2007. Rio de Janeiro, Brazil: Ministry of Health (Brazil).                                                                                                          | Country                                                                                                                                                                                            | 2006-2007 | Survey                |
| Child stunting | Opinion and Statistics (IBOPE), Ministry of Health (Brazil). Brazil National Demographic and Health Survey of Children and Women 2006-2007. Rio de Janeiro, Brazil: Ministry of Health (Brazil).                                                                                                          | Country                                                                                                                                                                                            | 2006-2007 | Survey                |
| Child stunting | Guatemala Reproductive Health Survey 2002 as it appears in World Health Organization (WHO). WHO Global Database on Child Growth and Malnutrition. Geneva, Switzerland: World Health Organization (WHO).                                                                                                   | Country                                                                                                                                                                                            | 2002      | Survey                |
| Child stunting | National Health and Nutrition Survey as it appears in World Health Organization (WHO). WHO Global Database on Child Growth and Malnutrition. Geneva, Switzerland: World Health Organization (WHO).                                                                                                        | Country                                                                                                                                                                                            | 1989      | Report                |
| Child stunting | Brazilian Society for Family Welfare (BEMFAM), Macro International, Inc. Brazil Demographic and Health Survey 1996. Calverton, United States: Macro                                                                                                                                                       | Country                                                                                                                                                                                            | 1996      | Survey                |
| Child stunting | Mexico National Nutrition Survey in Rural Areas 1989 as it appears in World Health Organization (WHO). WHO Global Database on Child Growth and Malnutrition. Geneva, Switzerland: World Health Organization (WHO).                                                                                        | Country                                                                                                                                                                                            | 1989      | Survey                |
| Child stunting | Brazil Demographic and Health Survey 1996 as it appears in World Health Organization (WHO). WHO Global Database on Child Growth and Malnutrition. Geneva, Switzerland: World Health Organization (WHO).                                                                                                   | Country                                                                                                                                                                                            | 1996      | Survey                |
| Child stunting | Brazilian Society for Family Welfare (BEMFAM), Westinghouse; Institute for Resource Development. Brazil Demographic and Health Survey 1986. Columbia, United States: Westinghouse; Institute for Resource Development.                                                                                    | Country                                                                                                                                                                                            | 1986      | Survey                |
| Child stunting | children of the Aripuanã Park, Brazilian Amazon as it appears in World Health Organization (WHO). WHO Global Database on Child Growth and Malnutrition - Historical. Geneva, Switzerland: World Health Organization (WHO).                                                                                |                                                                                                                                                                                                    | 1989      | Scientific literature |
| Child stunting | Guinea-Bissau SMART Nutrition Survey 2008 as it appears in World Health Organization (WHO). WHO Global Database on Child Growth and Malnutrition. Geneva, Switzerland: World Health Organization (WHO).                                                                                                   | Country                                                                                                                                                                                            | 2008      | Survey                |
| Child stunting | appears in World Health Organization (WHO). WHO Global Database on Child Growth and Malnutrition - Historical. Geneva, Switzerland: World Health Organization (WHO).                                                                                                                                      | Country                                                                                                                                                                                            | 1987-1992 | Report                |



|                      |                                                                                                                                                                                                                                                                                                                                                                |                                                                                                                                                                                                    |           |                       |
|----------------------|----------------------------------------------------------------------------------------------------------------------------------------------------------------------------------------------------------------------------------------------------------------------------------------------------------------------------------------------------------------|----------------------------------------------------------------------------------------------------------------------------------------------------------------------------------------------------|-----------|-----------------------|
|                      |                                                                                                                                                                                                                                                                                                                                                                | Ceará, Espírito Santo, Maranhão, Minas Gerais, Paraíba, Pernambuco, Piauí, Rio Grande do Norte, Rio de Janeiro, Sergipe, São Paulo, Alagoas, Bahia, Ceará, Espírito Santo, Maranhão, Minas Gerais, |           |                       |
| Child stunting       | Brazil Living Standards Measurement Survey 1996-1997 months, Niterói, Brazil as it appears in World Health Organization (WHO). WHO Global Database on Child Growth and Malnutrition - Historical. Geneva, Switzerland: World Health Organization (WHO).                                                                                                        |                                                                                                                                                                                                    | 1996-1997 | Survey                |
| Child stunting       |                                                                                                                                                                                                                                                                                                                                                                |                                                                                                                                                                                                    | 1995      | Scientific literature |
| Child stunting       | Mexico National Nutrition Survey 1998-1999 as it appears in World Health Organization (WHO). WHO Global Database on Child Growth and Malnutrition. Geneva, Switzerland: World Health Organization (WHO).                                                                                                                                                       | Country                                                                                                                                                                                            | 1998      | Survey                |
| Iron deficiency      | the National Institutes of Health (FNIH), National Institute of Science, Technology, and Biomedicine of Semi-Arid Brazil (INCT-IBISAB). Brazil - Fortaleza Malnutrition and Enteric Disease Study 2009-2014.                                                                                                                                                   | Ceará, Ceará, Ceará, Ceará, Ceará                                                                                                                                                                  | 2010-2013 | Survey                |
| Iron deficiency      | Opinion and Statistics (IBOPE), Ministry of Health (Brazil). Brazil National Demographic and Health Survey of Children and Women 2006-2007. Rio de Janeiro, Brazil: Ministry of Health (Brazil).                                                                                                                                                               | Country                                                                                                                                                                                            | 2006-2007 | Survey                |
| Iron deficiency      | Rondo PH, Abbott R, Rodrigues LC, Tomkins AM. Vitamin A, folate, and iron concentrations in cord and maternal blood of intra-uterine growth retarded and appropriate birth weight babies. . 1995; 49(6): 391-9.                                                                                                                                                |                                                                                                                                                                                                    | 1991-1992 | Scientific literature |
| Iron deficiency      | Osório MM, Lira PI, Batista-Filho M, Ashworth A. Prevalence of anemia in children 6-59 months old in the state of Pernambuco, Brazil. . 2001; 10(2): 101-111.                                                                                                                                                                                                  |                                                                                                                                                                                                    | 2006      | Scientific literature |
| Iron deficiency      | Muniz-Junqueira MI, Queiroz EFO. Relationship between protein-energy malnutrition, vitamin A, and parasitoses in living in Brasília. . 2002; 35(2): 133-140.                                                                                                                                                                                                   |                                                                                                                                                                                                    | 1983      | Scientific literature |
| Iron deficiency      | Brazil - School Lunch: History, Evolution and Contribution in Addressing the Nutritional Needs of the Child                                                                                                                                                                                                                                                    |                                                                                                                                                                                                    | 1996      | Report                |
| Iron deficiency      | Iron Deficiency and Iron Deficiency Anemia in the Population of 6 Months to 6 Years in Vitória, Espírito Santo, Southeastern Brazil                                                                                                                                                                                                                            | Espírito Santo                                                                                                                                                                                     | 2001-2003 | Report                |
| Iron deficiency      | Piauí State Government, United Nations Children's Fund (UNICEF). Brazil - Piauí Children and Adolescents: Health, Education, and Work 1991. Teresina, Brazil: Assis AMO, Gaudenzi EN, Gomes G, Ribeiro R de C, Szarfarc SC, Souza SB de. [Hemoglobin concentration, breastfeeding and complementary feeding in the first year of life]. . 2004; 38(4): 543-51. | Piauí                                                                                                                                                                                              | 1991      | Report                |
| Iron deficiency      |                                                                                                                                                                                                                                                                                                                                                                |                                                                                                                                                                                                    | 1998-1999 | Scientific literature |
| Vitamin A deficiency | World Bank. World Development Indicators - Vitamin A Supplementation Coverage Rate. Washington DC, United States: World Bank.                                                                                                                                                                                                                                  | Global                                                                                                                                                                                             | 1999      | Administrative record |
| Vitamin A deficiency | Barreto ML, Santos LM, Assis AM, Araújo MP, Farenzena GG, Santos PA, Fiaccone RL. Effect of vitamin A supplementation on diarrhoea and acute lower-respiratory-tract infections in young children in Brazil. . 2010; CD008524.                                                                                                                                 |                                                                                                                                                                                                    | 1990-1991 | Scientific literature |
| Vitamin A deficiency | Martins MC, Santos LMP, Assis AMO. [Prevalence of hypovitaminosis A among preschool children from northeastern Brazil, 1998]. . 2004; 38(4): 537-42.                                                                                                                                                                                                           |                                                                                                                                                                                                    | 1998      | Scientific literature |
| Vitamin A deficiency | Azevedo MMS de, Cabral PC, Diniz A da S, Fisberg M, Fisberg RM, Arruda IKG de. [Vitamin A deficiency in preschool children of Recife, Northeast of Brazil]. .                                                                                                                                                                                                  |                                                                                                                                                                                                    | 2007      | Scientific literature |
| Vitamin A deficiency | Brazil - Pernambuco Second State Survey of Health and Nutrition 1997 as it                                                                                                                                                                                                                                                                                     | Pernambuco                                                                                                                                                                                         | 1997      | Survey                |
| Zinc deficiency      | Kanerva N, Kaartinen NE, Ovaskainen M-L, Konttinen H, Kontto J, Männistö S. A diet following Finnish nutrition recommendations does not contribute to the current epidemic of obesity. . 2013; 16(5): 786-94.                                                                                                                                                  |                                                                                                                                                                                                    | 1996-1997 | Scientific literature |
| Zinc deficiency      | Food and Agriculture Organization of the United Nations (FAO). FAOSTAT Food Balance Sheets, October 2014. Rome, Italy: Food and Agriculture Organization                                                                                                                                                                                                       | Global                                                                                                                                                                                             | 1990-2015 | Administrative record |
| Zinc deficiency      | Verly Junior E, Fisberg RM, Cesar CLG, Marchioni DML. Sources of variation of energy and nutrient intake among adolescents in São Paulo, Brazil. . 2010;                                                                                                                                                                                                       |                                                                                                                                                                                                    | 2007-2008 | Scientific literature |
| Zinc deficiency      | Henn RL, Fuchs SC, Moreira LB, Fuchs FD. Development and validation of a food frequency questionnaire (FFQ-Porto Alegre) for adolescent, adult and elderly populations from Southern Brazil. . 2010; 26(11): 2068-79.                                                                                                                                          |                                                                                                                                                                                                    | 2007-2009 | Scientific literature |
| Smoking              | Brazilian Institute of Geography and Statistics (IBGE), Ministry of Education (Brazil), Ministry of Health (Brazil), Ministry of Planning, Budget, and Management (Brazil). Brazil National Survey of School Health 2009.                                                                                                                                      | Country                                                                                                                                                                                            | 2009      | Survey                |
| Smoking              | Ministry of Health (Brazil), Secretariat of Health Surveillance, Ministry of Health (Brazil), University of São Paulo. Brazil Surveillance System of Risk Factors for Chronic Diseases by Telephone Interviews 2016.                                                                                                                                           | Country                                                                                                                                                                                            | 2016      | Survey                |
| Smoking              | Ministry of Health (Brazil), Secretariat of Health Surveillance, Ministry of Health (Brazil), University of São Paulo. Brazil Surveillance System of Risk Factors for Chronic Diseases by Telephone Interviews 2016.                                                                                                                                           | Country                                                                                                                                                                                            | 2016      | Survey                |
| Smoking              | Ministry of Health (Brazil), Secretariat of Health Surveillance, Ministry of Health (Brazil). Brazil Surveillance System of Risk Factors for Chronic Diseases by                                                                                                                                                                                               | Country                                                                                                                                                                                            | 2008      | Survey                |

|         |                                                                                                                                                                                                                           |               |      |                       |
|---------|---------------------------------------------------------------------------------------------------------------------------------------------------------------------------------------------------------------------------|---------------|------|-----------------------|
| Smoking | Ministry of Health (Brazil), Secretariat of Health Surveillance, Ministry of Health (Brazil). Brazil Surveillance System of Risk Factors for Chronic Diseases by                                                          | Country       | 2009 | Survey                |
| Smoking | Brazilian Institute of Geography and Statistics (IBGE), Ministry of Education (Brazil), Ministry of Health (Brazil), Ministry of Planning, Budget, and Management (Brazil). Brazil National Survey of School Health 2009. | Country       | 2009 | Survey                |
| Smoking | Ministry of Health (Brazil), Secretariat of Health Surveillance, Ministry of Health (Brazil), University of São Paulo. Brazil Surveillance System of Risk Factors for Chronic Diseases by Telephone Interviews 2015.      | Country       | 2015 | Survey                |
| Smoking | Ministry of Health (Brazil), Secretariat of Health Surveillance, Ministry of Health (Brazil), University of São Paulo. Brazil Surveillance System of Risk Factors for Chronic Diseases by Telephone Interviews 2015.      | Country       | 2015 | Survey                |
| Smoking | Ministry of Health (Brazil), Secretariat of Health Surveillance, Ministry of Health (Brazil). Brazil Surveillance System of Risk Factors for Chronic Diseases by                                                          | Country       | 2009 | Survey                |
| Smoking | Ministry of Health (Brazil), Secretariat of Health Surveillance, Ministry of Health (Brazil). Brazil Surveillance System of Risk Factors for Chronic Diseases by                                                          | Country       | 2010 | Survey                |
| Smoking | Brazilian Institute of Geography and Statistics (IBGE). Brazil National Survey of School Health 2015. Rio de Janeiro, Brazil: Brazilian Institute of Geography and                                                        | Country       | 2015 | Survey                |
| Smoking | Ministry of Health (Brazil), Secretariat of Health Surveillance, Ministry of Health (Brazil). Brazil Surveillance System of Risk Factors for Chronic Diseases by                                                          | Country       | 2010 | Survey                |
| Smoking | Ministry of Health (Brazil), Secretariat of Health Surveillance, Ministry of Health (Brazil). Brazil Surveillance System of Risk Factors for Chronic Diseases by                                                          | Country       | 2011 | Survey                |
| Smoking | Ministry of Health (Brazil). Brazil Surveillance System of Risk Factors for Chronic Diseases by                                                                                                                           | Country       | 2008 | Survey                |
| Smoking | Brazil - Hearts of Brazil Survey 2004                                                                                                                                                                                     | Country       | 2004 | Survey                |
| Smoking | Brazilian Institute of Geography and Statistics (IBGE). Brazil National Survey of School Health 2015. Rio de Janeiro, Brazil: Brazilian Institute of Geography and                                                        | Country       | 2015 | Survey                |
| Smoking | Ministry of Health (Brazil), Secretariat of Health Surveillance, Ministry of Health (Brazil). Brazil Surveillance System of Risk Factors for Chronic Diseases by                                                          | Country       | 2011 | Survey                |
| Smoking | Brazil - Hearts of Brazil Survey 2004                                                                                                                                                                                     | Country       | 2004 | Survey                |
| Smoking | Ministry of Health (Brazil), Secretariat of Health Surveillance, Ministry of Health (Brazil). Brazil Surveillance System of Risk Factors for Chronic Diseases by                                                          | Country       | 2012 | Survey                |
| Smoking | (Brazil), University of São Paulo. Brazil Surveillance System of Risk Factors for Chronic Diseases by Telephone Interviews 2014. Rio de Janeiro, Brazil: Secretariat of Health Surveillance, Ministry of Health (Brazil). | Country       | 2014 | Survey                |
| Smoking | Brazil Household Survey About the Use of Psychotropic Drugs 2005                                                                                                                                                          | Country       | 2005 | Survey                |
| Smoking | Iser BPM, Yokota RTC, de Sa NNB, de Moura L, Malta DC. Prevalencia de fatores de risco e protecao para doencas cronicas nas capitais do Brasil - principais resultados do Vigitel 2010. . 2012; 17(9): 2343-56.           |               | 2010 | Scientific literature |
| Smoking | Ministry of Health (Brazil), Secretariat of Health Surveillance, Ministry of Health (Brazil). Brazil Surveillance System of Risk Factors for Chronic Diseases by                                                          | Country       | 2012 | Survey                |
| Smoking | Ministry of Health (Brazil). Brazil Survey of Knowledge, Attitudes, and Practices                                                                                                                                         | Country       | 2008 | Survey                |
| Smoking | Brazil Household Survey About the Use of Psychotropic Drugs 2005                                                                                                                                                          | Country       | 2005 | Survey                |
| Smoking | Ministry of Planning, Budget, and Management (Brazil). Brazil National Health Survey 2013. Rio de Janeiro, Brazil: Brazilian Institute of Geography and                                                                   | Country       | 2013 | Survey                |
| Smoking | Statistics (IBGE).                                                                                                                                                                                                        | Country       | 2013 | Survey                |
| Smoking | Ministry of Health (Brazil). Brazil Survey of Knowledge, Attitudes, and Practices                                                                                                                                         | Country       | 2008 | Survey                |
| Smoking | (Brazil), University of São Paulo. Brazil Surveillance System of Risk Factors for Chronic Diseases by Telephone Interviews 2013. Rio de Janeiro, Brazil: Secretariat of Health Surveillance, Ministry of Health (Brazil). | Country       | 2013 | Survey                |
| Smoking | (Brazil), University of São Paulo. Brazil Surveillance System of Risk Factors for Chronic Diseases by Telephone Interviews 2013. Rio de Janeiro, Brazil: Secretariat of Health Surveillance, Ministry of Health (Brazil). | Country       | 2013 | Survey                |
| Smoking | Ministry of Planning, Budget, and Management (Brazil). Brazil National Health Survey 2013. Rio de Janeiro, Brazil: Brazilian Institute of Geography and                                                                   | Country       | 2013 | Survey                |
| Smoking | Statistics (IBGE).                                                                                                                                                                                                        | Country       | 2013 | Survey                |
| Smoking | (Brazil), University of São Paulo. Brazil Surveillance System of Risk Factors for Chronic Diseases by Telephone Interviews 2014. Rio de Janeiro, Brazil: Secretariat of Health Surveillance, Ministry of Health (Brazil). | Country       | 2014 | Survey                |
| Smoking | Iser BPM, Yokota RTC, de Sa NNB, de Moura L, Malta DC. Prevalencia de fatores de risco e protecao para doencas cronicas nas capitais do Brasil - principais resultados do Vigitel 2010. . 2012; 17(9): 2343-56.           |               | 2010 | Scientific literature |
| Smoking | Brazil - Rio Grande do Sul Global Youth Tobacco Survey 2002                                                                                                                                                               | Rio Grande do | 2002 | Survey                |
| Smoking | Iser BPM, Malta DC Claro RM, de Moura EC, Neto OIM. Fatores de risco e protecao para doencas cronicas nao transmissiveis obtidos por inquerito telefonico - VIGITEL Brasil - 2009. . 2011; 14(Suppl 1): 90-102.           |               | 2009 | Scientific literature |
| Smoking | (Brazil), Ministry of Health (Brazil), Ministry of Planning, Budget, and Management (Brazil), Secretariat of Health Surveillance, Ministry of Health                                                                      | Country       | 2012 | Survey                |
| Smoking | (Brazil). Brazil National Survey of School Health 2012.                                                                                                                                                                   | Country       | 2003 | Survey                |
| Smoking | Brazil World Health Survey 2003                                                                                                                                                                                           | Country       | 2003 | Survey                |
| Smoking | Brazil World Health Survey 2003                                                                                                                                                                                           | Country       | 2003 | Survey                |
| Smoking | Brazilian Society for Family Welfare (BEMFAM), Macro International, Inc. Brazil Demographic and Health Survey 1996. Calverton, United States: Macro                                                                       | Country       | 1996 | Survey                |
| Smoking | Brazilian Society for Family Welfare (BEMFAM), Macro International, Inc. Brazil Demographic and Health Survey 1996. Calverton, United States: Macro                                                                       | Country       | 1996 | Survey                |

|         |                                                                                                                                                                                                                                                                                                                                                                        |                                                                                                                                                                                                                                                                                                                                                                                                                       |      |        |
|---------|------------------------------------------------------------------------------------------------------------------------------------------------------------------------------------------------------------------------------------------------------------------------------------------------------------------------------------------------------------------------|-----------------------------------------------------------------------------------------------------------------------------------------------------------------------------------------------------------------------------------------------------------------------------------------------------------------------------------------------------------------------------------------------------------------------|------|--------|
| Smoking | and Statistics (IBGE), Centers for Disease Control and Prevention (CDC), Ministry of Health (Brazil), National Cancer Institute (Brazil), Pan American Health Organization (PAHO), Secretariat of Health Surveillance, Ministry of Health (Brazil). Brazil Global Adult Tobacco Survey 2008. Atlanta, United States: Centers for Disease Control and Prevention (CDC). | Country                                                                                                                                                                                                                                                                                                                                                                                                               | 2008 | Survey |
| Smoking | and Statistics (IBGE), Centers for Disease Control and Prevention (CDC), Ministry of Health (Brazil), National Cancer Institute (Brazil), Pan American Health Organization (PAHO), Secretariat of Health Surveillance, Ministry of Health (Brazil). Brazil Global Adult Tobacco Survey 2008. Atlanta, United States: Centers for Disease Control and Prevention (CDC). | Country                                                                                                                                                                                                                                                                                                                                                                                                               | 2008 | Survey |
| Smoking | Brazilian Society for Family Welfare (BEMFAM), Macro International, Inc. Brazil Demographic and Health Survey 1991. Calverton, United States: Macro                                                                                                                                                                                                                    | Country                                                                                                                                                                                                                                                                                                                                                                                                               | 1991 | Survey |
| Smoking | Brazil - Rio de Janeiro Global Youth Tobacco Survey 2005                                                                                                                                                                                                                                                                                                               | Rio de Janeiro                                                                                                                                                                                                                                                                                                                                                                                                        | 2005 | Survey |
| Smoking | Brazil - Rio de Janeiro Global Youth Tobacco Survey 2005                                                                                                                                                                                                                                                                                                               | Rio de Janeiro                                                                                                                                                                                                                                                                                                                                                                                                        | 2005 | Survey |
| Smoking | Brazil - Rio Grande do Norte Global Youth Tobacco Survey 2002                                                                                                                                                                                                                                                                                                          | Rio Grande do                                                                                                                                                                                                                                                                                                                                                                                                         | 2002 | Survey |
| Smoking | Brazil - Rio Grande do Norte Global Youth Tobacco Survey 2002                                                                                                                                                                                                                                                                                                          | Rio Grande do                                                                                                                                                                                                                                                                                                                                                                                                         | 2002 | Survey |
| Smoking | Brazil - Rio Grande do Sul Global Youth Tobacco Survey 2002                                                                                                                                                                                                                                                                                                            | Rio Grande do Amazonas, Ceará, Distrito Federal, Espírito Santo, Mato Grosso Do Sul, Minas Gerais, Paraná, Paraíba, Pará, Pernambuco, Rio Grande do orte, Rio Grande do Sul, Rio de Janeiro, Santa Catarina, Sergipe, São Paulo, Amazonas, Ceará, Distrito Federal, Espírito Santo, Mato Grosso Do Sul, Minas Gerais, Paraná, Paraíba, Pará, Pernambuco, Rio Grande do orte, Rio Grande do Sul, Rio de Janeiro, Santa | 2002 | Survey |
| Smoking | Brazil Risk Factor Morbidity Noncommunicable Disease Survey 2002-2005                                                                                                                                                                                                                                                                                                  | Janeiro, Santa                                                                                                                                                                                                                                                                                                                                                                                                        | 2002 | Survey |
| Smoking | Brazilian Society for Family Welfare (BEMFAM), Macro International, Inc. Brazil Demographic and Health Survey 1991. Calverton, United States: Macro                                                                                                                                                                                                                    | Country                                                                                                                                                                                                                                                                                                                                                                                                               | 1991 | Survey |

|                   |                                                                                                                                                                                                                            |                                                                                                                                                                                                                                                                                                                                                                                                           |      |                       |
|-------------------|----------------------------------------------------------------------------------------------------------------------------------------------------------------------------------------------------------------------------|-----------------------------------------------------------------------------------------------------------------------------------------------------------------------------------------------------------------------------------------------------------------------------------------------------------------------------------------------------------------------------------------------------------|------|-----------------------|
|                   |                                                                                                                                                                                                                            | Amazonas, Ceará, Distrito Federal, Espírito Santo, Mato Grosso Do Sul, Minas Gerais, Paraná, Paraíba, Pará, Pernambuco, Rio Grande do Norte, Rio Grande do Sul, Rio de Janeiro, Santa Catarina, Sergipe, São Paulo, Amazonas, Ceará, Distrito Federal, Espírito Santo, Mato Grosso Do Sul, Minas Gerais, Paraná, Paraíba, Pará, Pernambuco, Rio Grande do Norte, Rio Grande do Sul, Rio de Janeiro, Santa |      |                       |
| Smoking           | Brazil Risk Factor Morbidity Noncommunicable Disease Survey 2002-2005                                                                                                                                                      |                                                                                                                                                                                                                                                                                                                                                                                                           | 2002 | Survey                |
| Smoking           | Brazil National Survey on Health and Nutrition 1989                                                                                                                                                                        | Country                                                                                                                                                                                                                                                                                                                                                                                                   | 1989 | Survey                |
| Smoking           | Ministry of Health (Brazil), Secretariat of Health Surveillance, Ministry of Health (Brazil), University of São Paulo. Brazil Surveillance System of Risk Factors for Chronic Diseases by Telephone Interviews 2006.       | Country                                                                                                                                                                                                                                                                                                                                                                                                   | 2006 | Survey                |
| Smoking           | Brazilian Society for Family Welfare (BEMFAM), Westinghouse; Institute for Resource Development. Brazil Demographic and Health Survey 1986. Columbia, United States: Westinghouse; Institute for Resource Development.     | Country                                                                                                                                                                                                                                                                                                                                                                                                   | 1986 | Survey                |
| Smoking           | Ministry of Health (Brazil), Secretariat of Health Surveillance, Ministry of Health (Brazil), University of São Paulo. Brazil Surveillance System of Risk Factors for Chronic Diseases by Telephone Interviews 2006.       | Country                                                                                                                                                                                                                                                                                                                                                                                                   | 2006 | Survey                |
| Smoking           | Ministry of Health (Brazil), Secretariat of Health Surveillance, Ministry of Health (Brazil). Brazil Surveillance System of Risk Factors for Chronic Diseases by                                                           | Country                                                                                                                                                                                                                                                                                                                                                                                                   | 2007 | Survey                |
| Smoking           | Brazilian Society for Family Welfare (BEMFAM), Westinghouse; Institute for Resource Development. Brazil Demographic and Health Survey 1986. Columbia, United States: Westinghouse; Institute for Resource Development.     | Country                                                                                                                                                                                                                                                                                                                                                                                                   | 1986 | Survey                |
| Smoking           | Ministry of Health (Brazil), Secretariat of Health Surveillance, Ministry of Health (Brazil). Brazil Surveillance System of Risk Factors for Chronic Diseases by                                                           | Country                                                                                                                                                                                                                                                                                                                                                                                                   | 2007 | Survey                |
| Smoking           | Iser BPM, Malta DC Claro RM, de Moura EC, Neto OIM. Fatores de risco e protecao para doencas cronicas nao transmissiveis obtidos por inquerito telefonico - VIGITEL Brasil - 2009. . 2011; 14(Suppl 1): 90-102.            |                                                                                                                                                                                                                                                                                                                                                                                                           | 2009 | Scientific literature |
| Smoking           | Centers for Disease Control and Prevention (CDC), World Health Organization (WHO). Brazil - Alagoas Global Youth Tobacco Survey 2004 . Atlanta, United States: Centers for Disease Control and Prevention (CDC).           | Alagoas, Alagoas                                                                                                                                                                                                                                                                                                                                                                                          | 2004 | Survey                |
| Smoking           | Centers for Disease Control and Prevention (CDC), World Health Organization (WHO). Brazil - Mato Grosso Do Sul Global Youth Tobacco Survey 2002. Atlanta, United States: Centers for Disease Control and Prevention (CDC). | Sul, Mato Grosso Do Sul, Mato Grosso Do Sul                                                                                                                                                                                                                                                                                                                                                               | 2002 | Survey                |
| Smoking           | Centers for Disease Control and Prevention (CDC), World Health Organization (WHO). Brazil - Mato Grosso Do Sul Global Youth Tobacco Survey 2002. Atlanta, United States: Centers for Disease Control and Prevention (CDC). | Sul, Mato Grosso Do Sul, Mato Grosso Do Sul                                                                                                                                                                                                                                                                                                                                                               | 2002 | Survey                |
| Smoking           | Centers for Disease Control and Prevention (CDC), World Health Organization (WHO). Brazil - Paraíba Global Youth Tobacco Survey 2002 . Atlanta, United States: Centers for Disease Control and Prevention (CDC).           | Paraíba, Paraíba, Paraíba                                                                                                                                                                                                                                                                                                                                                                                 | 2002 | Survey                |
| Smoking           | Centers for Disease Control and Prevention (CDC), World Health Organization (WHO). Brazil - Paraíba Global Youth Tobacco Survey 2002 . Atlanta, United States: Centers for Disease Control and Prevention (CDC).           | Paraíba, Paraíba, Paraíba                                                                                                                                                                                                                                                                                                                                                                                 | 2002 | Survey                |
| Smoking           | Brazil National Survey on Health and Nutrition 1989                                                                                                                                                                        | Country                                                                                                                                                                                                                                                                                                                                                                                                   | 1989 | Survey                |
| Smoking           | Centers for Disease Control and Prevention (CDC), World Health Organization (WHO). Brazil - Alagoas Global Youth Tobacco Survey 2004 . Atlanta, United States: Centers for Disease Control and Prevention (CDC).           | Alagoas, Alagoas                                                                                                                                                                                                                                                                                                                                                                                          | 2004 | Survey                |
| Smoking           | (Brazil), Ministry of Health (Brazil), Ministry of Planning, Budget, and Management (Brazil), Secretariat of Health Surveillance, Ministry of Health (Brazil). Brazil National Survey of School Health 2012.               | Country                                                                                                                                                                                                                                                                                                                                                                                                   | 2012 | Survey                |
| Smokeless tobacco | Brazilian Institute of Geography and Statistics (IBGE). Brazil National Survey of School Health 2015. Rio de Janeiro, Brazil: Brazilian Institute of Geography and                                                         | Country                                                                                                                                                                                                                                                                                                                                                                                                   | 2015 | Survey                |

|                                        |                                                                                                                                                                                                                                                                                                                                                                         |                                 |           |                       |
|----------------------------------------|-------------------------------------------------------------------------------------------------------------------------------------------------------------------------------------------------------------------------------------------------------------------------------------------------------------------------------------------------------------------------|---------------------------------|-----------|-----------------------|
|                                        | and Statistics (IBGE), Centers for Disease Control and Prevention (CDC), Ministry of Health (Brazil), National Cancer Institute (Brazil), Pan American Health Organization (PAHO), Secretariat of Health Surveillance, Ministry of Health (Brazil). Brazil Global Adult Tobacco Survey 2008. Atlanta, United States: Centers for Disease Control and Prevention (CDC).  | Country                         | 2008      | Survey                |
| Smokeless tobacco                      |                                                                                                                                                                                                                                                                                                                                                                         |                                 |           |                       |
| Secondhand smoke                       | Brazilian Society for Family Welfare (BEMFAM), Macro International, Inc. Brazil Demographic and Health Survey 1991. Calverton, United States: Macro                                                                                                                                                                                                                     | Country                         | 1991      | Survey                |
| Secondhand smoke                       | Brazilian Society for Family Welfare (BEMFAM), Macro International, Inc. Brazil Demographic and Health Survey 1996. Calverton, United States: Macro                                                                                                                                                                                                                     | Country                         | 1996      | Survey                |
| Secondhand smoke                       | Brazil General Census 1991 - IPUMS                                                                                                                                                                                                                                                                                                                                      | Country                         | 1991      | Census                |
| Secondhand smoke                       | Brazil General Census 1980 - IPUMS                                                                                                                                                                                                                                                                                                                                      | Country                         | 1980      | Census                |
| Secondhand smoke                       | Brazil General Census 2000 - IPUMS                                                                                                                                                                                                                                                                                                                                      | Country                         | 2000      | Census                |
| Secondhand smoke                       | Brazil Demographic Census 2010 - IPUMS                                                                                                                                                                                                                                                                                                                                  | Country                         | 2010      | Census                |
| Alcohol use                            | Brazil World Health Survey 2003                                                                                                                                                                                                                                                                                                                                         | Country                         | 2003      | Survey                |
|                                        | Group, Public Health Institute, Centre for Addiction and Mental Health (Canada), Centre for Alcohol Policy Research, Turning Point Alcohol and Drug Centre (Australia), Kettil Bruun Society for Social and Epidemiological Research on Alcohol, University of North Dakota. Brazil - Botucatu Gender, Alcohol and Culture: An International Study (GENACIS) 2001-2002. | São Paulo, São Paulo, São Paulo | 2001      | Survey                |
| Alcohol use                            |                                                                                                                                                                                                                                                                                                                                                                         |                                 |           |                       |
| Drug use                               | Ministry of Health (Brazil). Brazil Survey of Knowledge, Attitudes, and Practices                                                                                                                                                                                                                                                                                       | Country                         | 2005      | Survey                |
| Drug use                               | Ministry of Health (Brazil). Brazil Survey of Knowledge, Attitudes, and Practices                                                                                                                                                                                                                                                                                       | Country                         | 2005      | Survey                |
|                                        | Bastos FI, Bertoni N, Hacker MA, Study Group on Population, Gender and AIDS (Brazil). [Drug and alcohol use: main findings of a national survey, Brazil 2005].                                                                                                                                                                                                          |                                 | 2005      | Scientific literature |
| Drug use                               | Bastos FI, Bertoni N, Hacker MA, Study Group on Population, Gender and AIDS (Brazil). [Drug and alcohol use: main findings of a national survey, Brazil 2005].                                                                                                                                                                                                          |                                 | 2005      | Scientific literature |
|                                        | Food and Agriculture Organization of the United Nations (FAO). FAOSTAT Food Balance Sheets, October 2014. Rome, Italy: Food and Agriculture Organization                                                                                                                                                                                                                | Global                          | 1990-2015 | Administrative record |
| Diet low in fruits                     |                                                                                                                                                                                                                                                                                                                                                                         |                                 |           |                       |
| Diet low in fruits                     | Euromonitor International. Euromonitor Passport - Fresh Foods Market Statistics. London, United Kingdom: Euromonitor International.                                                                                                                                                                                                                                     | Country                         | 2001-2015 | Administrative record |
|                                        | Barbosa F dos S, Sichiari R, Junger WL. Assessing usual dietary intake in complex sample design surveys: the National Dietary Survey. . 2013; 47 Suppl 1: 1715-5.                                                                                                                                                                                                       |                                 | 2008      | Scientific literature |
| Diet low in fruits                     |                                                                                                                                                                                                                                                                                                                                                                         |                                 |           |                       |
| Diet low in fruits                     | Brazil Consumer Expenditure Survey 2008-2009                                                                                                                                                                                                                                                                                                                            | Country                         | 2008-2009 | Survey                |
| Diet low in vegetables                 | Brazil Consumer Expenditure Survey 2008-2009                                                                                                                                                                                                                                                                                                                            | Country                         | 2008-2009 | Survey                |
|                                        | Food and Agriculture Organization of the United Nations (FAO). FAOSTAT Food Balance Sheets, October 2014. Rome, Italy: Food and Agriculture Organization                                                                                                                                                                                                                | Global                          | 1990-2015 | Administrative record |
| Diet low in vegetables                 |                                                                                                                                                                                                                                                                                                                                                                         |                                 |           |                       |
| Diet low in vegetables                 | Euromonitor International. Euromonitor Passport - Vegetables Market Statistics. London, United Kingdom: Euromonitor International.                                                                                                                                                                                                                                      | Global                          | 1990-2015 | Administrative record |
|                                        | Food and Agriculture Organization of the United Nations (FAO). FAOSTAT Food Balance Sheets, October 2014. Rome, Italy: Food and Agriculture Organization                                                                                                                                                                                                                | Global                          | 1990-2015 | Administrative record |
| Diet low in legumes                    |                                                                                                                                                                                                                                                                                                                                                                         |                                 |           |                       |
| Diet low in legumes                    | Brazil Consumer Expenditure Survey 2008-2009                                                                                                                                                                                                                                                                                                                            | Country                         | 2008-2009 | Survey                |
|                                        | Euromonitor International. Euromonitor Passport - Pulses Market Statistics. London, United Kingdom: Euromonitor International.                                                                                                                                                                                                                                          | Country                         | 1990-2015 | Administrative record |
| Diet low in legumes                    |                                                                                                                                                                                                                                                                                                                                                                         |                                 |           |                       |
| Diet low in whole grains               | Brazil Consumer Expenditure Survey 2008-2009 as it appears in                                                                                                                                                                                                                                                                                                           | Country                         | 2008-2009 | Survey                |
| Diet low in nuts and seeds             | Brazil Consumer Expenditure Survey 2008-2009                                                                                                                                                                                                                                                                                                                            | Country                         | 2008-2009 | Survey                |
|                                        | Food and Agriculture Organization of the United Nations (FAO). FAOSTAT Food Balance Sheets, October 2014. Rome, Italy: Food and Agriculture Organization                                                                                                                                                                                                                | Global                          | 1990-2015 | Administrative record |
| Diet low in nuts and seeds             |                                                                                                                                                                                                                                                                                                                                                                         |                                 |           |                       |
| Diet low in nuts and seeds             | Euromonitor International. Euromonitor Passport - Nuts Market Statistics. London, United Kingdom: Euromonitor International.                                                                                                                                                                                                                                            | Global                          | 1990-2015 | Administrative record |
|                                        | Brazil Consumer Expenditure Survey 2008-2009                                                                                                                                                                                                                                                                                                                            | Country                         | 2008-2009 | Survey                |
| Diet low in milk                       |                                                                                                                                                                                                                                                                                                                                                                         |                                 |           |                       |
| Diet low in milk                       | Food and Agriculture Organization of the United Nations (FAO). FAOSTAT Food Balance Sheets, October 2014. Rome, Italy: Food and Agriculture Organization                                                                                                                                                                                                                | Global                          | 1990-2015 | Administrative record |
|                                        | Euromonitor International. Euromonitor Passport - Dairy Market Statistics. London, United Kingdom: Euromonitor International.                                                                                                                                                                                                                                           | Global                          | 2002-2015 | Administrative record |
|                                        | Peters BSE, Verly E, Marchioni DML, Fisberg M, Martini LA. The influence of breakfast and dairy products on dietary calcium and vitamin D intake in postpubertal adolescents and young adults. . 2012; 25(1): 69-74.                                                                                                                                                    |                                 | 2006      | Scientific literature |
| Diet low in milk                       |                                                                                                                                                                                                                                                                                                                                                                         |                                 |           |                       |
| Diet high in red meat                  | Food and Agriculture Organization of the United Nations (FAO). FAOSTAT Food Balance Sheets, October 2014. Rome, Italy: Food and Agriculture Organization                                                                                                                                                                                                                | Global                          | 1990-2015 | Administrative record |
|                                        | Euromonitor International. Euromonitor Passport - Meat Market Statistics. London, United Kingdom: Euromonitor International.                                                                                                                                                                                                                                            | Global                          | 2002-2015 | Administrative record |
| Diet high in red meat                  |                                                                                                                                                                                                                                                                                                                                                                         |                                 |           |                       |
| Diet high in red meat                  | de Carvalho AM, Cesar CLG, Fisberg RM, Marchioni DM. Meat consumption in São Paulo-Brazil: trend in the last decade. . 2014; 9(5): e96667.                                                                                                                                                                                                                              |                                 | 2003-2008 | Scientific literature |
|                                        | Brazil Consumer Expenditure Survey 2008-2009                                                                                                                                                                                                                                                                                                                            | Country                         | 2008-2009 | Survey                |
| Diet high in red meat                  |                                                                                                                                                                                                                                                                                                                                                                         |                                 |           |                       |
| Diet high in processed meat            | Euromonitor International. Partially Hydrogenated Vegetable Oil Sales                                                                                                                                                                                                                                                                                                   | Country                         | 1990-2015 | Administrative record |
| Diet high in processed meat            | Brazil Consumer Expenditure Survey 2008-2009                                                                                                                                                                                                                                                                                                                            | Country                         | 2008-2009 | Survey                |
|                                        | Euromonitor International. Euromonitor Passport - Processed Meat and Seafood Market Statistics. London, United Kingdom: Euromonitor International.                                                                                                                                                                                                                      | Global                          | 2002-2015 | Administrative record |
| Diet high in processed meat            |                                                                                                                                                                                                                                                                                                                                                                         |                                 |           |                       |
| Diet high in processed meat            | Euromonitor International. Euromonitor Passport - Fruit Market Statistics. London, United Kingdom: Euromonitor International.                                                                                                                                                                                                                                           | Global                          | 2002-2015 | Administrative record |
|                                        | London, United Kingdom: Euromonitor International.                                                                                                                                                                                                                                                                                                                      |                                 |           |                       |
| Diet high in sugar-sweetened beverages |                                                                                                                                                                                                                                                                                                                                                                         |                                 |           |                       |
| Diet high in sugar-sweetened beverages | Brazil Consumer Expenditure Survey 2008-2009 as it appears in                                                                                                                                                                                                                                                                                                           | Country                         | 2008-2009 | Survey                |
| Diet high in sugar-sweetened beverages | Brazil Consumer Expenditure Survey 2008-2009                                                                                                                                                                                                                                                                                                                            | Country                         | 2008-2009 | Survey                |
|                                        | Pereira RA, Souza AM, Duffey KJ, Sichiari R, Popkin BM. Beverage consumption in Brazil: results from the first National Dietary Survey. . 2015; 18(7): 1164-72.                                                                                                                                                                                                         |                                 | 2008-2009 | Scientific literature |
| Diet high in sugar-sweetened beverages |                                                                                                                                                                                                                                                                                                                                                                         |                                 |           |                       |

|                                         |                                                                                                                                                                                                                                                                                                                                                                         |                                 |           |                       |
|-----------------------------------------|-------------------------------------------------------------------------------------------------------------------------------------------------------------------------------------------------------------------------------------------------------------------------------------------------------------------------------------------------------------------------|---------------------------------|-----------|-----------------------|
| Diet low in fiber                       | Molina MC, Bettiol H, Barbieri MA, Silva AA, Conceicao SI, Dos-Santos JE. Food consumption by young adults living in Ribeirao Preto, SP, 2002/2004. . 2007;                                                                                                                                                                                                             |                                 | 2002-2004 | Scientific literature |
| Diet low in fiber                       | Verly Junior E, Fisberg RM, Cesar CLG, Marchioni DML. Sources of variation of energy and nutrient intake among adolescents in São Paulo, Brazil. . 2010;                                                                                                                                                                                                                |                                 | 2007-2008 | Scientific literature |
| Diet low in fiber                       | Martinez MF, Philippi ST, Estima C, Leal G. Validity and reproducibility of a food frequency questionnaire to assess food group intake in adolescents. . 2013;                                                                                                                                                                                                          |                                 | 2010      | Scientific literature |
| Diet low in fiber                       | Henn RL, Fuchs SC, Moreira LB, Fuchs FD. Development and validation of a food frequency questionnaire (FFQ-Porto Alegre) for adolescent, adult and elderly populations from Southern Brazil. . 2010; 26(11): 2068-79.                                                                                                                                                   |                                 | 2007-2009 | Scientific literature |
| Diet low in fiber                       | Scagliusi FB, Moriguti E, Monteiro JP, Ferrioli E. Calibration of the food list and portion sizes of a food frequency questionnaire applied to free-living elderly people. . 2013; 29(5): 760-4.                                                                                                                                                                        |                                 | 2010-2012 | Scientific literature |
| Diet low in fiber                       | Brazil Consumer Expenditure Survey 2008-2009                                                                                                                                                                                                                                                                                                                            | Country                         | 2008-2009 | Survey                |
| Diet low in fiber                       | Food and Agriculture Organization of the United Nations (FAO). FAOSTAT Food Balance Sheets, October 2014. Rome, Italy: Food and Agriculture Organization                                                                                                                                                                                                                | Global                          | 1990-2015 | Administrative record |
| Diet low in fiber                       | Kanerva N, Kaartinen NE, Ovaskainen M-L, Konttinen H, Kontto J, Männistö S. A diet following Finnish nutrition recommendations does not contribute to the current epidemic of obesity. . 2013; 16(5): 786-94.                                                                                                                                                           |                                 | 1996-1997 | Scientific literature |
| Diet low in calcium                     | Scagliusi FB, Moriguti E, Monteiro JP, Ferrioli E. Calibration of the food list and portion sizes of a food frequency questionnaire applied to free-living elderly people. . 2013; 29(5): 760-4.                                                                                                                                                                        |                                 | 2010-2012 | Scientific literature |
| Diet low in calcium                     | Food and Agriculture Organization of the United Nations (FAO). FAOSTAT Food Balance Sheets, October 2014. Rome, Italy: Food and Agriculture Organization                                                                                                                                                                                                                | Global                          | 1990-2015 | Administrative record |
| Diet low in calcium                     | Kanerva N, Kaartinen NE, Ovaskainen M-L, Konttinen H, Kontto J, Männistö S. A diet following Finnish nutrition recommendations does not contribute to the current epidemic of obesity. . 2013; 16(5): 786-94.                                                                                                                                                           |                                 | 1996-1997 | Scientific literature |
| Diet low in calcium                     | Martini LA, Verly E, Marchioni DML, Fisberg RM. Prevalence and correlates of calcium and vitamin D status adequacy in adolescents, adults, and elderly from the Health Survey-São Paulo. . 2013; 29(6): 845-50.                                                                                                                                                         |                                 | 2008      | Scientific literature |
| Diet low in calcium                     | Verly Junior E, Fisberg RM, Cesar CLG, Marchioni DML. Sources of variation of energy and nutrient intake among adolescents in São Paulo, Brazil. . 2010;                                                                                                                                                                                                                |                                 | 2007-2008 | Scientific literature |
| Diet low in calcium                     | Henn RL, Fuchs SC, Moreira LB, Fuchs FD. Development and validation of a food frequency questionnaire (FFQ-Porto Alegre) for adolescent, adult and elderly populations from Southern Brazil. . 2010; 26(11): 2068-79.                                                                                                                                                   |                                 | 2007-2009 | Scientific literature |
| Diet low in calcium                     | Peters BSE, Verly E, Marchioni DML, Fisberg M, Martini LA. The influence of breakfast and dairy products on dietary calcium and vitamin D intake in postpubertal adolescents and young adults. . 2012; 25(1): 69-74.                                                                                                                                                    |                                 | 2006      | Scientific literature |
| Diet low in calcium                     | Food and Agriculture Organization of the United Nations (FAO). FAOSTAT Food Balance Sheets, April 2015. Rome, Italy: Food and Agriculture Organization of                                                                                                                                                                                                               | Global                          | 1990-2015 | Administrative record |
| Diet low in seafood omega-3 fatty acids | Food and Agriculture Organization of the United Nations (FAO). FAOSTAT Food Balance Sheets, October 2014. Rome, Italy: Food and Agriculture Organization                                                                                                                                                                                                                | Global                          | 1990-2015 | Administrative record |
| Diet low in polyunsaturated fatty acids | Food and Agriculture Organization of the United Nations (FAO). FAOSTAT Food Balance Sheets, October 2014. Rome, Italy: Food and Agriculture Organization                                                                                                                                                                                                                | Global                          | 1990-2015 | Administrative record |
| Diet low in polyunsaturated fatty acids | Henn RL, Fuchs SC, Moreira LB, Fuchs FD. Development and validation of a food frequency questionnaire (FFQ-Porto Alegre) for adolescent, adult and elderly populations from Southern Brazil. . 2010; 26(11): 2068-79.                                                                                                                                                   |                                 | 2007-2009 | Scientific literature |
| Diet high in trans fatty acids          | Euromonitor International. Partially Hydrogenated Vegetable Oil Sales                                                                                                                                                                                                                                                                                                   | Country                         | 2002-2015 | Administrative record |
| Diet high in sodium                     | Verly Junior E, Fisberg RM, Cesar CLG, Marchioni DML. Sources of variation of energy and nutrient intake among adolescents in São Paulo, Brazil. . 2010;                                                                                                                                                                                                                |                                 | 2007-2008 | Scientific literature |
| Childhood sexual abuse                  | Ipsos, National Institute of Public Policy for Alcohol and Other Drugs (INPAD) (Brazil), University of São Paulo. Brazil National Alcohol and Drugs Survey 2011-                                                                                                                                                                                                        | Country                         | 2011-2012 | Survey                |
| Childhood sexual abuse                  | Bassani DG, Palazzo LS, Béria JU, Gigante LP, Figueiredo AC, Aerts DR, Raymann BC. Child sexual abuse in southern Brazil and associated factors: a population-                                                                                                                                                                                                          |                                 | 2002-2003 | Scientific literature |
| Childhood sexual abuse                  | Group, Public Health Institute, Centre for Addiction and Mental Health (Canada), Centre for Alcohol Policy Research, Turning Point Alcohol and Drug Centre (Australia), Kettil Bruun Society for Social and Epidemiological Research on Alcohol, University of North Dakota. Brazil - Botucatu Gender, Alcohol and Culture: An International Study (GENACIS) 2001-2002. | São Paulo, São Paulo, São Paulo | 2001      | Survey                |
| Childhood sexual abuse                  | Bassani DG, Palazzo LS, Béria JU, Gigante LP, Figueiredo AC, Aerts DR, Raymann BC. Child sexual abuse in southern Brazil and associated factors: a population-                                                                                                                                                                                                          |                                 | 2002-2003 | Scientific literature |
| Childhood sexual abuse                  | Group, Public Health Institute, Centre for Addiction and Mental Health (Canada), Centre for Alcohol Policy Research, Turning Point Alcohol and Drug Centre (Australia), Kettil Bruun Society for Social and Epidemiological Research on Alcohol, University of North Dakota. Brazil - Botucatu Gender, Alcohol and Culture: An International Study (GENACIS) 2001-2002. | São Paulo, São Paulo, São Paulo | 2001      | Survey                |
| Childhood sexual abuse                  | Group, Public Health Institute, Centre for Addiction and Mental Health (Canada), Centre for Alcohol Policy Research, Turning Point Alcohol and Drug Centre (Australia), Kettil Bruun Society for Social and Epidemiological Research on Alcohol, University of North Dakota. Brazil - Botucatu Gender, Alcohol and Culture: An International Study (GENACIS) 2001-2002. | São Paulo, São Paulo, São Paulo | 2001      | Survey                |

|                           |                                                                                                                                                                                                                                                                                                                                                                         |                                                                      |           |                       |
|---------------------------|-------------------------------------------------------------------------------------------------------------------------------------------------------------------------------------------------------------------------------------------------------------------------------------------------------------------------------------------------------------------------|----------------------------------------------------------------------|-----------|-----------------------|
| Childhood sexual abuse    | Federal University of Pernambuco, Feminist Collective for Health and Sexuality (São Paulo), University of São Paulo, World Health Organization (WHO). Brazil WHO Multi-country Study on Women's Health and Domestic Violence Against Women 2000-2001.                                                                                                                   | São Paulo, Pernambuco, São Paulo, Pernambuco, São Paulo, Pernambuco, | 2000-2001 | Survey                |
| Childhood sexual abuse    | Ipsos, National Institute of Public Policy for Alcohol and Other Drugs (INPAD) (Brazil), University of São Paulo. Brazil National Alcohol and Drugs Survey 2011-                                                                                                                                                                                                        | Country                                                              | 2011-2012 | Survey                |
| Childhood sexual abuse    | Ipsos, National Institute of Public Policy for Alcohol and Other Drugs (INPAD) (Brazil), University of São Paulo. Brazil National Alcohol and Drugs Survey 2011-                                                                                                                                                                                                        | Country                                                              | 2011-2012 | Survey                |
| Childhood sexual abuse    | Federal University of Pernambuco, Feminist Collective for Health and Sexuality (São Paulo), University of São Paulo, World Health Organization (WHO). Brazil WHO Multi-country Study on Women's Health and Domestic Violence Against Women 2000-2001.                                                                                                                   | São Paulo, Pernambuco, São Paulo, Pernambuco, São Paulo, Pernambuco, | 2000-2001 | Survey                |
| Childhood sexual abuse    | Bassani DG, Palazzo LS, Béria JU, Gigante LP, Figueiredo AC, Aerts DR, Raymann BC. Child sexual abuse in southern Brazil and associated factors: a population-                                                                                                                                                                                                          |                                                                      | 2002-2003 | Scientific literature |
| Intimate partner violence | Brazilian Society for Family Welfare (BEMFAM), Westinghouse; Institute for Resource Development. Brazil Demographic and Health Survey 1986. Columbia, United States: Westinghouse; Institute for Resource Development.                                                                                                                                                  | Country                                                              | 1986      | Survey                |
| Intimate partner violence | Group, Public Health Institute, Centre for Addiction and Mental Health (Canada), Centre for Alcohol Policy Research, Turning Point Alcohol and Drug Centre (Australia), Kettil Bruun Society for Social and Epidemiological Research on Alcohol, University of North Dakota. Brazil - Botucatu Gender, Alcohol and Culture: An International Study (GENACIS) 2001-2002. | São Paulo, São Paulo, São Paulo                                      | 2001      | Survey                |
| Intimate partner violence | Group, Public Health Institute, Centre for Addiction and Mental Health (Canada), Centre for Alcohol Policy Research, Turning Point Alcohol and Drug Centre (Australia), Kettil Bruun Society for Social and Epidemiological Research on Alcohol, University of North Dakota. Brazil - Botucatu Gender, Alcohol and Culture: An International Study (GENACIS) 2001-2002. | São Paulo, São Paulo, São Paulo                                      | 2001      | Survey                |
| Intimate partner violence | Schraiber LB, D'Oliveira AFPL, França Junior I. [Intimate partner sexual violence among men and women in urban Brazil, 2005]. . 2008; 127-37.                                                                                                                                                                                                                           |                                                                      | 1998-2005 | Scientific literature |
| Intimate partner violence | Zaleski M, Pinsky I, Laranjeira R, Ramisetty-Mikler S, Caetano R. Intimate partner violence and alcohol consumption. . 2010; 44(1): 53-9.                                                                                                                                                                                                                               |                                                                      | 2005-2006 | Scientific literature |
| Intimate partner violence | Zaleski M, Pinsky I, Laranjeira R, Ramisetty-Mikler S, Caetano R. Intimate partner violence and alcohol consumption. . 2010; 44(1): 53-9.                                                                                                                                                                                                                               |                                                                      | 2005-2006 | Scientific literature |
| Intimate partner violence | Lindner SR, Coelho EB, Bolsoni CC, Rojas PF, Boing AF. [Prevalence of intimate partner physical violence in men and women from Florianópolis, Santa Catarina State, Brazil: a population-based study]. . 2015; 31(4): 815-26.                                                                                                                                           |                                                                      | 2009-2010 | Scientific literature |
| Intimate partner violence | Lindner SR, Coelho EB, Bolsoni CC, Rojas PF, Boing AF. [Prevalence of intimate partner physical violence in men and women from Florianópolis, Santa Catarina State, Brazil: a population-based study]. . 2015; 31(4): 815-26.                                                                                                                                           |                                                                      | 2009-2010 | Scientific literature |
| Intimate partner violence | Brazilian Society for Family Welfare (BEMFAM), Macro International, Inc. Brazil Demographic and Health Survey 1996. Calverton, United States: Macro                                                                                                                                                                                                                     | Country                                                              | 1996      | Survey                |
| Intimate partner violence | Federal University of Pernambuco, Feminist Collective for Health and Sexuality (São Paulo), University of São Paulo, World Health Organization (WHO). Brazil WHO Multi-country Study on Women's Health and Domestic Violence Against Women 2000-2001.                                                                                                                   | São Paulo, Pernambuco, São Paulo, Pernambuco, São Paulo, Pernambuco, | 2000-2002 | Survey                |
| Intimate partner violence | Federal University of Pernambuco, Feminist Collective for Health and Sexuality (São Paulo), University of São Paulo, World Health Organization (WHO). Brazil WHO Multi-country Study on Women's Health and Domestic Violence Against Women 2000-2001.                                                                                                                   | São Paulo, Pernambuco, São Paulo, Pernambuco, São Paulo, Pernambuco, | 2000-2002 | Survey                |
| Intimate partner violence | Schraiber LB, D'Oliveira AFPL, França Junior I. [Intimate partner sexual violence among men and women in urban Brazil, 2005]. . 2008; 127-37.                                                                                                                                                                                                                           |                                                                      | 1998-2005 | Scientific literature |
| Intimate partner violence | Brazilian Society for Family Welfare (BEMFAM), Macro International, Inc. Brazil Demographic and Health Survey 1996. Calverton, United States: Macro                                                                                                                                                                                                                     | Country                                                              | 1996      | Survey                |
| Intimate partner violence | Ipsos, National Institute of Public Policy for Alcohol and Other Drugs (INPAD) (Brazil), University of São Paulo. Brazil National Alcohol and Drugs Survey 2011-                                                                                                                                                                                                        | Country                                                              | 2011-2012 | Survey                |
| Intimate partner violence | Brazilian Society for Family Welfare (BEMFAM), Macro International, Inc. Brazil Demographic and Health Survey 1991. Calverton, United States: Macro                                                                                                                                                                                                                     | Country                                                              | 1991      | Survey                |
| Intimate partner violence | Brazilian Society for Family Welfare (BEMFAM), Macro International, Inc. Brazil Demographic and Health Survey 1991. Calverton, United States: Macro                                                                                                                                                                                                                     | Country                                                              | 1991      | Survey                |
| Intimate partner violence | Ipsos, National Institute of Public Policy for Alcohol and Other Drugs (INPAD) (Brazil), University of São Paulo. Brazil National Alcohol and Drugs Survey 2011-                                                                                                                                                                                                        | Country                                                              | 2011-2012 | Survey                |
| Intimate partner violence | Brazilian Society for Family Welfare (BEMFAM), Westinghouse; Institute for Resource Development. Brazil Demographic and Health Survey 1986. Columbia, United States: Westinghouse; Institute for Resource Development.                                                                                                                                                  | Country                                                              | 1986      | Survey                |

|                             |                                                                                                                                                                                                                                                                                                                      |                                                                                                                                                                                                                                                                                                                                                                                                                 |           |                       |
|-----------------------------|----------------------------------------------------------------------------------------------------------------------------------------------------------------------------------------------------------------------------------------------------------------------------------------------------------------------|-----------------------------------------------------------------------------------------------------------------------------------------------------------------------------------------------------------------------------------------------------------------------------------------------------------------------------------------------------------------------------------------------------------------|-----------|-----------------------|
| Unsafe sex                  | Joint United Nations Program on HIV/AIDS (UNAIDS), Ministry of Health (Brazil). Brazil Progress Report on the Response to HIV/AIDS 2012. Geneva, Switzerland: Joint United Nations Program on HIV/AIDS (UNAIDS), 2012.                                                                                               | Country                                                                                                                                                                                                                                                                                                                                                                                                         | 2010      | Report                |
| Low physical activity       | Bauman A, Bull F, Chey T, Craig CL, Ainsworth BE, Sallis JF, Bowles HR, Hagstromer M, Sjostrom M, Pratt M, IPS Group. The International Prevalence Study on Physical Activity: results from 20 countries. . 2009; 21.                                                                                                |                                                                                                                                                                                                                                                                                                                                                                                                                 | 2003      | Scientific literature |
| Low physical activity       | Ministry of Health (Brazil), Secretariat of Health Surveillance, Ministry of Health (Brazil). Brazil Surveillance System of Risk Factors for Chronic Diseases by                                                                                                                                                     | Country Amazonas, Ceará, Distrito Federal, Espírito Santo, Mato Grosso Do Sul, Minas Gerais, Paraná, Paraíba, Pará, Pernambuco, Rio Grande do orte, Rio Grande do Sul, Rio de Janeiro, Santa Catarina, Sergipe, São Paulo, Amazonas, Ceará, Distrito Federal, Espírito Santo, Mato Grosso Do Sul, Minas Gerais, Paraná, Paraíba, Pará, Pernambuco, Rio Grande do orte, Rio Grande do Sul, Rio de Janeiro, Santa | 2012      | Survey                |
| Low physical activity       | Brazil Risk Factor Morbidity Noncommunicable Disease Survey 2002-2005 Ministry of Health (Brazil), Secretariat of Health Surveillance, Ministry of Health (Brazil). Brazil Surveillance System of Risk Factors for Chronic Diseases by                                                                               | Country                                                                                                                                                                                                                                                                                                                                                                                                         | 2002-2005 | Survey                |
| Low physical activity       | Ministry of Health (Brazil), Secretariat of Health Surveillance, Ministry of Health (Brazil), University of São Paulo. Brazil Surveillance System of Risk Factors for Chronic Diseases by Telephone Interviews 2006.                                                                                                 | Country                                                                                                                                                                                                                                                                                                                                                                                                         | 2007      | Survey                |
| Low physical activity       | Ministry of Health (Brazil), Secretariat of Health Surveillance, Ministry of Health (Brazil). Brazil Surveillance System of Risk Factors for Chronic Diseases by                                                                                                                                                     | Country                                                                                                                                                                                                                                                                                                                                                                                                         | 2006      | Survey                |
| Low physical activity       | Ministry of Health (Brazil), Secretariat of Health Surveillance, Ministry of Health (Brazil). Brazil Surveillance System of Risk Factors for Chronic Diseases by                                                                                                                                                     | Country                                                                                                                                                                                                                                                                                                                                                                                                         | 2008      | Survey                |
| Low physical activity       | Ministry of Health (Brazil), Secretariat of Health Surveillance, Ministry of Health (Brazil). Brazil Surveillance System of Risk Factors for Chronic Diseases by                                                                                                                                                     | Country                                                                                                                                                                                                                                                                                                                                                                                                         | 2009      | Survey                |
| Low physical activity       | Ministry of Health (Brazil), Secretariat of Health Surveillance, Ministry of Health (Brazil). Brazil Surveillance System of Risk Factors for Chronic Diseases by                                                                                                                                                     | Country                                                                                                                                                                                                                                                                                                                                                                                                         | 2010      | Survey                |
| Low physical activity       | Ministry of Health (Brazil), Secretariat of Health Surveillance, Ministry of Health (Brazil). Brazil Surveillance System of Risk Factors for Chronic Diseases by                                                                                                                                                     | Country                                                                                                                                                                                                                                                                                                                                                                                                         | 2011      | Survey                |
| Low physical activity       | Brazil World Health Survey 2003                                                                                                                                                                                                                                                                                      | Country                                                                                                                                                                                                                                                                                                                                                                                                         | 2002-2003 | Survey                |
| Low physical activity       | Ministry of Planning, Budget, and Management (Brazil). Brazil National Health Survey 2013. Rio de Janeiro, Brazil: Brazilian Institute of Geography and Statistics (IBGE).                                                                                                                                           | Country                                                                                                                                                                                                                                                                                                                                                                                                         | 2013      | Survey                |
| High fasting plasma glucose | National Institute of Public Health (Mexico). Mexico National Survey of Health and Nutrition 2005-2006. Cuernavaca, Mexico: National Institute of Public                                                                                                                                                             | Country                                                                                                                                                                                                                                                                                                                                                                                                         | 2006      | Survey                |
| High fasting plasma glucose | PF, Cunha MLMN, Stefanello II JVL, Brum LM, Oliveira LA, Silva CR, Ribeiro ALD. Diabetes mellitus and impaired glucose tolerance in urban adult population. . 2014; 60(2): 118-24.                                                                                                                                   | Country                                                                                                                                                                                                                                                                                                                                                                                                         | 2010      | Scientific literature |
| High fasting plasma glucose | Rigo JC, Vieira JL, Dalacorte RR, Reichert CL. Prevalence of metabolic syndrome in an elderly community: comparison between three diagnostic methods. .                                                                                                                                                              |                                                                                                                                                                                                                                                                                                                                                                                                                 | 2005      | Scientific literature |
| High fasting plasma glucose | Marcopito LF, Rodrigues SSF, Pacheco MA, Shirassu MM, Goldfeder AJ, de Moraes MAOL. Prevalence of a set of risk factors for chronic diseases in the city                                                                                                                                                             |                                                                                                                                                                                                                                                                                                                                                                                                                 | 2001      | Scientific literature |
| High fasting plasma glucose | Lima-Costa MF, Mambriini JV, Leite ML, Peixoto SV, Firmo JO, Loyola Filho AI, Gouveia MH, Leal TP, Pereira AC, Macinko J, Tarazona-Santos E. Socioeconomic Position, But Not African Genomic Ancestry, Is Associated With Blood Pressure in the Bambui-Epigen (Brazil) Cohort Study of Aging. . 2016; 67(2): 349-55. |                                                                                                                                                                                                                                                                                                                                                                                                                 | 1997      | Scientific literature |
| High fasting plasma glucose | Marquezine GF, Oliveira CM, Pereira AC, Krieger JE, Mill JG. Metabolic syndrome determinants in an urban population from Brazil: social class and                                                                                                                                                                    |                                                                                                                                                                                                                                                                                                                                                                                                                 | 2003      | Scientific literature |
| High fasting plasma glucose | TM, Torquato MTCG, Souza GMD, Oishi J, Leal AMO. Prevalence of metabolic syndrome and its association with educational inequalities among Brazilian adults: a population-based study. . 2011; 44(7): 7139.                                                                                                           |                                                                                                                                                                                                                                                                                                                                                                                                                 | 2007      | Scientific literature |
| High fasting plasma glucose | Ministry of Planning, Budget, and Management (Brazil). Brazil National Health Survey 2013. Rio de Janeiro, Brazil: Brazilian Institute of Geography and                                                                                                                                                              | Country                                                                                                                                                                                                                                                                                                                                                                                                         | 2013      | Survey                |



|                              |                                                                                                                                                                                                                                                                                                                     |                                |           |                       |
|------------------------------|---------------------------------------------------------------------------------------------------------------------------------------------------------------------------------------------------------------------------------------------------------------------------------------------------------------------|--------------------------------|-----------|-----------------------|
| High fasting plasma glucose  | Lessa I, Magalhães L, Araújo MJ, de Almeida Filho N, Aquino E, Oliveira MM. Arterial hypertension in the adult population of Salvador (BA)--Brazil. . 2006;                                                                                                                                                         |                                | 1999      | Scientific literature |
| High total cholesterol       | Garcez MR, Pereira JL, Fontanelli M de M, Marchioni DML, Fisberg RM. Prevalence of dyslipidemia according to the nutritional status in a                                                                                                                                                                            |                                | 2008      | Scientific literature |
| High total cholesterol       | Passos VM de A, Barreto SM, Diniz LM, Lima-Costa MF. Type 2 diabetes: prevalence and associated factors in a Brazilian community--the Bambuí health                                                                                                                                                                 |                                | 1996      | Scientific literature |
| High total cholesterol       | Krieger JE, Nascimento Neto RM, Chagas ACP, Hearts of Brazil Study and Peripheral Arterial Disease Committee of the Brazilian Society of Cardiology/Funcor. Prevalence and risk factors associated with peripheral arterial disease in the Hearts of Brazil Project. . 2008; 91(6): 370-82.                         |                                | 2004      | Scientific literature |
| High total cholesterol       | Chagas SV, Costa DM, Vianna Araujo D, Garcia Rosa ML. Racial differences in HbA1c: a cross-sectional analysis of a Brazilian public primary care population. . 2013; 7(2): 135-1.                                                                                                                                   |                                | 2006      | Scientific literature |
| High total cholesterol       | Olinto MTA, Gigante DP, Horta B, Silveira V, Oliveira I, Willett W. Major dietary patterns and cardiovascular risk factors among young Brazilian adults. . 2012;                                                                                                                                                    |                                | 2004      | Scientific literature |
| High total cholesterol       | Gonçalves GC, Soler JMP, Andrade M de, Lorenzi-Filho G, Vallada H, Taporoski TP, Pedrazzoli M, Azambuja AP, Oliveira CM de, Alvim RO, Krieger JE, Pereira AC. Cohort profile: the Baependi Heart Study--a family-based, highly admixed cohort study in a rural Brazilian town. . 2016; 6(10): 011598.               |                                | 2005      | Scientific literature |
| High total cholesterol       | Rigo JC, Vieira JL, Dalacorte RR, Reichert CL. Prevalence of metabolic syndrome in an elderly community: comparison between three diagnostic methods. .                                                                                                                                                             |                                | 2005      | Scientific literature |
| High total cholesterol       | Schaan BD, Harzheim E, Gus I. [Cardiac risk profile in diabetes mellitus and impaired fasting glucose]. . 2004; 38(4): 529-36.                                                                                                                                                                                      |                                | 1999      | Scientific literature |
| High total cholesterol       | Lima-Costa MF, Firmo JOA, Uchoa E. Cohort profile: the Bambuí (Brazil) Cohort Study of Ageing. . 2011; 40(4): 862-7.                                                                                                                                                                                                |                                | 1997      | Scientific literature |
| High total cholesterol       | Freitas MPD, Loyola Filho AI de, Lima-Costa MF. Birth cohort differences in cardiovascular risk factors in a Brazilian population of older elderly: the Bambuí Cohort Study of Aging (1997 and 2008). . 2011; 5409-417.                                                                                             |                                | 1997-2008 | Scientific literature |
| High systolic blood pressure | Olinto MTA, Gigante DP, Horta B, Silveira V, Oliveira I, Willett W. Major dietary patterns and cardiovascular risk factors among young Brazilian adults. . 2012;                                                                                                                                                    |                                | 2004      | Scientific literature |
| High systolic blood pressure | Lima-Costa MF, Firmo JOA, Uchoa E. Cohort profile: the Bambuí (Brazil) Cohort Study of Ageing. . 2011; 40(4): 862-7.                                                                                                                                                                                                |                                | 1997      | Scientific literature |
| High systolic blood pressure | Rigo JC, Vieira JL, Dalacorte RR, Reichert CL. Prevalence of metabolic syndrome in an elderly community: comparison between three diagnostic methods. .                                                                                                                                                             |                                | 2005      | Scientific literature |
| High systolic blood pressure | Passos VM de A, Barreto SM, Diniz LM, Lima-Costa MF. Type 2 diabetes: prevalence and associated factors in a Brazilian community--the Bambuí health                                                                                                                                                                 |                                | 1996      | Scientific literature |
| High systolic blood pressure | Krieger JE, Nascimento Neto RM, Chagas ACP, Hearts of Brazil Study and Peripheral Arterial Disease Committee of the Brazilian Society of Cardiology/Funcor. Prevalence and risk factors associated with peripheral arterial disease in the Hearts of Brazil Project. . 2008; 91(6): 370-82.                         |                                | 2005      | Scientific literature |
| High systolic blood pressure | Lima-Costa MF, Mambrini JV, Leite ML, Peixoto SV, Firmo JO, Loyola Filho AI, Gouveia MH, Leal TP, Pereira AC, Macinko J, Tarazona-Santos E. Socioeconomic Position, But Not African Genomic Ancestry, Is Associated With Blood Pressure in the Bambuí-Epigen (Brazil) Cohort Study of Aging. . 2016; 67(2): 349-55. |                                | 1997      | Scientific literature |
| High systolic blood pressure | Gonçalves GC, Soler JMP, Andrade M de, Lorenzi-Filho G, Vallada H, Taporoski TP, Pedrazzoli M, Azambuja AP, Oliveira CM de, Alvim RO, Krieger JE, Pereira AC. Cohort profile: the Baependi Heart Study--a family-based, highly admixed cohort study in a rural Brazilian town. . 2016; 6(10): 011598.               |                                | 2005      | Scientific literature |
| High systolic blood pressure | Marcopito LF, Rodrigues SSF, Pacheco MA, Shirassu MM, Goldfeder AJ, de Moraes MAOL. Prevalence of a set of risk factors for chronic diseases in the city                                                                                                                                                            |                                | 2002      | Scientific literature |
| High systolic blood pressure | Lessa I, Magalhães L, Araújo MJ, de Almeida Filho N, Aquino E, Oliveira MM. Arterial hypertension in the adult population of Salvador (BA)--Brazil. . 2006;                                                                                                                                                         |                                | 1999      | Scientific literature |
| High systolic blood pressure | Schaan BD, Harzheim E, Gus I. [Cardiac risk profile in diabetes mellitus and impaired fasting glucose]. . 2004; 38(4): 529-36.                                                                                                                                                                                      |                                | 1999      | Scientific literature |
| High systolic blood pressure | Public Health Department, Federal University of Santa Catarina. Brazil - Florianopolis Epidemiological Study on the Health Status of the Adult                                                                                                                                                                      | Santa Catarina, Santa Catarina | 2009      | Survey                |
| High systolic blood pressure | Freitas MPD, Loyola Filho AI de, Lima-Costa MF. Birth cohort differences in cardiovascular risk factors in a Brazilian population of older elderly: the Bambuí Cohort Study of Aging (1997 and 2008). . 2011; 5409-417.                                                                                             |                                | 1997-2008 | Scientific literature |
| High systolic blood pressure | Castro RA, Moncau JE, Marcopito LF. Hypertension prevalence in the city of Formiga, MG, Brazil. . 2007; 88(3): 334-9.                                                                                                                                                                                               |                                | 2004      | Scientific literature |
| High systolic blood pressure | Almeida RC, Dias DJL, Deguchi KTP, Spesia CH, Coelho OR. Prevalence and treatment of hypertension in urban and riverside areas in Porto Velho, the                                                                                                                                                                  |                                | 2013      | Scientific literature |
| High systolic blood pressure | Fattori A, Santimaria MR, Alves RMA, Guariento ME, Neri AL. Influence of blood pressure profile on frailty phenotype in community-dwelling elders in Brazil -                                                                                                                                                       |                                | 2008      | Scientific literature |
| High systolic blood pressure | Silva DA, Petroski EL, Peres MA. Prehypertension and hypertension among adults in a metropolitan area in Southern Brazil: population-based study. . 2012;                                                                                                                                                           |                                | 2009      | Scientific literature |
| High systolic blood pressure | J, Vinuesa R, Schargrotsky H, Champagne B, Pramparo P, Wilson E, CARMELA Study Investigators. Hypertension in seven Latin American cities: the Cardiovascular Risk Factor Multiple Evaluation in Latin America (CARMELA) study. . 2010; 28(1): 24-34.                                                               |                                | 2004      | Scientific literature |
| High systolic blood pressure | de Lolio CA. Prevalência da hipertensão arterial em Araraquara. . 1990; 55(3):                                                                                                                                                                                                                                      |                                | 1987      | Scientific literature |
| High systolic blood pressure | Pereira JC, Barreto SM, Passos VM de A. [Cardiovascular risk profile and health self-evaluation in Brazil: a population-based study]. . 2009; 25(6): 491-8.                                                                                                                                                         |                                | 2003      | Scientific literature |

|                              |                                                                                                                                                                                                                                                                                                                                                                                                    |         |           |                       |
|------------------------------|----------------------------------------------------------------------------------------------------------------------------------------------------------------------------------------------------------------------------------------------------------------------------------------------------------------------------------------------------------------------------------------------------|---------|-----------|-----------------------|
| High systolic blood pressure | CR, Santos FC, Bilton T, Ebel SJ, Macedo MB, Almada CM, Nasri F, Miranda RD, Gonçalves M, Santos AL, Fraietta R, Vivacqua I, Alves ML, Tudisco ES. Two-year follow-up study of elderly residents in S. Paulo, Brazil: methodology and preliminary results. . 1998; 32(5): 397-407.                                                                                                                 |         | 1992      | Scientific literature |
| High systolic blood pressure | Moraes RS, Fuchs FD, Moreira LB, Wiehe M, Pereira GM, Fuchs SC. Risk factors for cardiovascular disease in a Brazilian population-based cohort study. . 2003; Hartmann M, Dias-da-Costa JS, Anselmo Olinto MT, Pattussi MP, Tramontini A. Prevalência de hipertensão arterial sistêmica e fatores associados: um estudo de base populacional em mulheres no Sul do Brasil. . 2007; 23(8): 1857-66. |         | 1995      | Scientific literature |
| High systolic blood pressure | R, Marafioti Gonçalves R, Arenales de Lima S, Bulgarelli Bestetti R. Prevalence of hypertension in the urban population of Catanduva, in the State of São Paulo, Brazil. . 2001; 77(1): 9-21.                                                                                                                                                                                                      |         | 2003      | Scientific literature |
| High systolic blood pressure | Fornes NS, Martins IS, Velasquez-Melendez G, Latorre Mdo R. Escores de consumo alimentar e níveis lipêmicos em população de São Paulo, Brasil. .                                                                                                                                                                                                                                                   |         | 1998      | Scientific literature |
| High systolic blood pressure | Marcellino C, Henn RL, Olinto MT, Bressan AW, Paniz VM, Pattussi MP. Physical inactivity and associated factors among women from a municipality in southern                                                                                                                                                                                                                                        |         | 1991      | Scientific literature |
| High body-mass index         | Ministry of Health (Brazil), Secretariat of Health Surveillance, Ministry of Health (Brazil). Brazil Surveillance System of Risk Factors for Chronic Diseases by                                                                                                                                                                                                                                   | Country | 2006      | Scientific literature |
| High body-mass index         | Ministry of Health (Brazil), Secretariat of Health Surveillance, Ministry of Health (Brazil). Brazil Surveillance System of Risk Factors for Chronic Diseases by                                                                                                                                                                                                                                   | Country | 2010      | Survey                |
| High body-mass index         | Mintem GC, Horta BL, Domingues MR, Gigante DP. Body size dissatisfaction among young adults from the 1982 Pelotas birth cohort. . 2015; 69(1): 55-61.                                                                                                                                                                                                                                              |         | 2012      | Survey                |
| High body-mass index         | Ministry of Health (Brazil), Secretariat of Health Surveillance, Ministry of Health (Brazil). Brazil Surveillance System of Risk Factors for Chronic Diseases by                                                                                                                                                                                                                                   | Country | 2004      | Scientific literature |
| High body-mass index         | Ministry of Health (Brazil), Secretariat of Health Surveillance, Ministry of Health (Brazil). Brazil Surveillance System of Risk Factors for Chronic Diseases by                                                                                                                                                                                                                                   | Country | 2011      | Survey                |
| High body-mass index         | Amaral C de A, Portela MC, Muniz PT, Farias E dos S, Araujo TS de, Souza OF de. Association of handgrip strength with self-reported diseases in adults in Rio                                                                                                                                                                                                                                      |         | 2007      | Scientific literature |
| High body-mass index         | Branco, Acre State, Brazil: a population-based study. . 2015; 31(6): 1313-25.                                                                                                                                                                                                                                                                                                                      |         | 2005      | Scientific literature |
| High body-mass index         | Brazil - Hearts of Brazil Survey 2004                                                                                                                                                                                                                                                                                                                                                              | Country | 2005      | Survey                |
| High body-mass index         | Guarita-Souza LC, Olandoski M, Faria-Neto JR. Elevated blood pressure and obesity in childhood: a cross-sectional evaluation of 4,609 schoolchildren. . 2014; 103(3): 238-44.                                                                                                                                                                                                                      |         | 2006      | Scientific literature |
| High body-mass index         | Ministry of Health (Brazil), Secretariat of Health Surveillance, Ministry of Health (Brazil), University of São Paulo. Brazil Surveillance System of Risk Factors for                                                                                                                                                                                                                              | Country | 2006      | Survey                |
| High body-mass index         | Chronic Diseases by Telephone Interviews 2006.                                                                                                                                                                                                                                                                                                                                                     |         | 2002-2007 | Survey                |
| High body-mass index         | Leal DB, de Assis MAA, Gonzalez-Chica DA, da Costa FF. Trends in adiposity in Brazilian 7-10-year-old schoolchildren evidence for increasing overweight but not obesity between 2002 and 2007. . 2014; 41(3): 255-62.                                                                                                                                                                              |         | 2008      | Scientific literature |
| High body-mass index         | Ministry of Health (Brazil), Secretariat of Health Surveillance, Ministry of Health (Brazil). Brazil Surveillance System of Risk Factors for Chronic Diseases by                                                                                                                                                                                                                                   | Country | 2008      | Survey                |
| High body-mass index         | Reigota RB, Pedro AO, de Souza Santos Machado V, Costa-Paiva L, Pinto-Neto AM. Prevalence of urinary incontinence and its association with multimorbidity in women aged 50 years or older: A population-based study. . 2016; 35(1): 62-8.                                                                                                                                                          |         | 2011      | Scientific literature |
| High body-mass index         | FAO Supply Utilization Accounts 1961-2013                                                                                                                                                                                                                                                                                                                                                          | Global  | 1990-2015 | Administrative record |
| High body-mass index         | Brazilian Society for Family Welfare (BEMFAM), Macro International, Inc. Brazil Demographic and Health Survey 1996. Calverton, United States: Macro                                                                                                                                                                                                                                                | Country | 1996      | Survey                |
| High body-mass index         | Ministry of Health (Brazil), Secretariat of Health Surveillance, Ministry of Health (Brazil). Brazil Surveillance System of Risk Factors for Chronic Diseases by                                                                                                                                                                                                                                   | Country | 2007      | Survey                |
| High body-mass index         | Brazilian Society for Family Welfare (BEMFAM), Westinghouse; Institute for Resource Development. Brazil Demographic and Health Survey 1986. Columbia, United States: Westinghouse; Institute for Resource Development.                                                                                                                                                                             | Country | 1986      | Survey                |

|                      |                                                                                                                                                                                                                                                                                                                                                                          |                                                                                                                                                                                                                                                                                                                                                                                                           |      |                       |
|----------------------|--------------------------------------------------------------------------------------------------------------------------------------------------------------------------------------------------------------------------------------------------------------------------------------------------------------------------------------------------------------------------|-----------------------------------------------------------------------------------------------------------------------------------------------------------------------------------------------------------------------------------------------------------------------------------------------------------------------------------------------------------------------------------------------------------|------|-----------------------|
|                      |                                                                                                                                                                                                                                                                                                                                                                          | Amazonas, Ceará, Distrito Federal, Espírito Santo, Mato Grosso Do Sul, Minas Gerais, Paraná, Paraíba, Pará, Pernambuco, Rio Grande do Norte, Rio Grande do Sul, Rio de Janeiro, Santa Catarina, Sergipe, São Paulo, Amazonas, Ceará, Distrito Federal, Espírito Santo, Mato Grosso Do Sul, Minas Gerais, Paraná, Paraíba, Pará, Pernambuco, Rio Grande do Norte, Rio Grande do Sul, Rio de Janeiro, Santa |      |                       |
| High body-mass index | Brazil Risk Factor Morbidity Noncommunicable Disease Survey 2002-2005                                                                                                                                                                                                                                                                                                    |                                                                                                                                                                                                                                                                                                                                                                                                           | 2003 | Survey                |
| High body-mass index | Ministry of Health (Brazil), Secretariat of Health Surveillance, Ministry of Health (Brazil). Brazil Surveillance System of Risk Factors for Chronic Diseases by Pimenta AM, Kac G, Gazzinelli A, Corrêa-Oliveira R, Velásquez-Meléndez G.                                                                                                                               | Country                                                                                                                                                                                                                                                                                                                                                                                                   | 2009 | Survey                |
| High body-mass index | Association between central obesity, triglycerides and hypertension in a rural                                                                                                                                                                                                                                                                                           |                                                                                                                                                                                                                                                                                                                                                                                                           | 2001 | Scientific literature |
| High body-mass index | Reichert FF, Azevedo MR, Breier A, Gerage AM. Physical activity and prevalence of hypertension in a population-based sample of Brazilian adults and elderly. .                                                                                                                                                                                                           |                                                                                                                                                                                                                                                                                                                                                                                                           | 2003 | Scientific literature |
| High body-mass index | Bustos P, da Silva AAM, Amigo H, Bettiol H, Barbieri MA. Metabolic syndrome in young adults from two socioeconomic Latin American settings. . 2007; 17(8):                                                                                                                                                                                                               |                                                                                                                                                                                                                                                                                                                                                                                                           | 2003 | Scientific literature |
| High body-mass index | Brazil Consumer Expenditure Survey 2002-2003                                                                                                                                                                                                                                                                                                                             | Country                                                                                                                                                                                                                                                                                                                                                                                                   | 2002 | Survey                |
| High body-mass index | Garcez MR, Pereira JL, Fontanelli M de M, Marchioni DML, Fisberg RM. Prevalence of dyslipidemia according to the nutritional status in a                                                                                                                                                                                                                                 |                                                                                                                                                                                                                                                                                                                                                                                                           | 2008 | Scientific literature |
| High body-mass index | Brazil World Health Survey 2003                                                                                                                                                                                                                                                                                                                                          | Country                                                                                                                                                                                                                                                                                                                                                                                                   | 2003 | Survey                |
| High body-mass index | Brazil - São Paulo Survey on Health, Well-Being, and Aging in Latin America and the Caribbean 1999-2000                                                                                                                                                                                                                                                                  | São Paulo                                                                                                                                                                                                                                                                                                                                                                                                 | 1999 | Survey                |
| High body-mass index | Brazilian Institute of Geography and Statistics (IBGE). Brazil National Household Sample Survey 2006. Rio de Janeiro, Brazil: Brazilian Institute of Geography and de Freitas SN, Caiaffa WT, César CC, Faria VA, do Nascimento RM, Coelho GL.                                                                                                                           | Country                                                                                                                                                                                                                                                                                                                                                                                                   | 2006 | Survey                |
| High body-mass index | Nutritional Risk in the Urban Population of Ouro Preto, Southeastern Region of Brazil: The Ouro Preto Heart Study. . 2007; 88(2): 191-9.                                                                                                                                                                                                                                 |                                                                                                                                                                                                                                                                                                                                                                                                           | 2001 | Scientific literature |
| High body-mass index | Santos Silva DA, Petroski EL, Peres MA. Is high body fat estimated by body mass index and waist circumference a predictor of hypertension in adults? A                                                                                                                                                                                                                   |                                                                                                                                                                                                                                                                                                                                                                                                           | 2009 | Scientific literature |
| High body-mass index | Machado EC, Silveira MF da, Silveira VMF da. Prevalence of weight-loss strategies and use of substances for weight-loss among adults: a population                                                                                                                                                                                                                       |                                                                                                                                                                                                                                                                                                                                                                                                           | 2010 | Scientific literature |
| High body-mass index | Group, Public Health Institute, Centre for Addiction and Mental Health (Canada), Centre for Alcohol Policy Research, Turning Point Alcohol and Drug Centre (Australia), Kettill Bruun Society for Social and Epidemiological Research on Alcohol, University of North Dakota. Brazil - Botucatu Gender, Alcohol and Culture: An International Study (GENACIS) 2001-2002. | São Paulo, São Paulo, São Paulo                                                                                                                                                                                                                                                                                                                                                                           | 2001 | Survey                |
| High body-mass index | Jaime PC, Duran AC, Sarti FM, Lock K. Investigating environmental determinants of diet, physical activity, and overweight among adults in Sao Paulo, Brazil. .                                                                                                                                                                                                           |                                                                                                                                                                                                                                                                                                                                                                                                           | 2003 | Scientific literature |
| High body-mass index | Ramos de Marins VM, Varnier Almeida RM, Pereira RA, Barros MB. Factors associated with overweight and central body fat in the city of Rio de Janeiro: results of a two-stage random sampling survey. . 2001; 115(3): 236-42.                                                                                                                                             |                                                                                                                                                                                                                                                                                                                                                                                                           | 1995 | Scientific literature |
| High body-mass index | Abrantes MM, Lamounier JA, Colosimo EA. Prevalência de sobrepeso e obesidade nas regiões Nordeste e Sudeste do Brasil. . 2003; 49(2): 162-6.                                                                                                                                                                                                                             |                                                                                                                                                                                                                                                                                                                                                                                                           | 1997 | Scientific literature |
| High body-mass index | Dalla Vecchia CF, Susin C, Rösing CK, Oppermann RV, Albandar JM. Overweight and obesity as risk indicators for periodontitis in adults. . 2005; 76(10): 1721-8.                                                                                                                                                                                                          |                                                                                                                                                                                                                                                                                                                                                                                                           | 2001 | Scientific literature |
| High body-mass index | De Assis MAA, Rolland-Cachera MF, de Vasconcelos FAG, Bellisle F, Conde W, Calvo MCM, Luna MEP, Ireton MJ, Grosseman S. Central adiposity in Brazilian schoolchildren aged 7-10 years. . 2007; 97(4): 799-805.                                                                                                                                                           |                                                                                                                                                                                                                                                                                                                                                                                                           | 2002 | Scientific literature |
| High body-mass index | MEP, Calvo MCM, Barros MVG, Pires MMS, Bellisle F. Obesity, overweight and thinness in schoolchildren of the city of Florianópolis, Southern Brazil. . 2005; 59(9): 1015-21.                                                                                                                                                                                             |                                                                                                                                                                                                                                                                                                                                                                                                           | 2002 | Scientific literature |
| High body-mass index | Guimarães JMN, de Souza Lopes C, Baima J, Sichiery R. Depression symptoms and hypothyroidism in a population-based study of middle-aged Brazilian                                                                                                                                                                                                                        |                                                                                                                                                                                                                                                                                                                                                                                                           | 2004 | Scientific literature |

|                          |                                                                                                                                                                                                                                                                                                           |                                                                                                                                                                                                    |           |                       |
|--------------------------|-----------------------------------------------------------------------------------------------------------------------------------------------------------------------------------------------------------------------------------------------------------------------------------------------------------|----------------------------------------------------------------------------------------------------------------------------------------------------------------------------------------------------|-----------|-----------------------|
| High body-mass index     | Oliveira AM, Oliveira AC, Almeida MS, Oliveira N, Adan L. Influence of the family nucleus on obesity in children from northeastern Brazil: a cross-sectional study.                                                                                                                                       |                                                                                                                                                                                                    | 2005      | Scientific literature |
| High body-mass index     | De Andrade FB, de França Caldas A Jr, Kitoko PM. Relationship between oral health, nutrient intake and nutritional status in a sample of Brazilian elderly                                                                                                                                                |                                                                                                                                                                                                    | 2006      | Scientific literature |
| High body-mass index     | PF, Cunha MLMN, Stefanello II JVL, Brum LM, Oliveira LA, Silva CR, Ribeiro ALD. Diabetes mellitus and impaired glucose tolerance in urban adult population. . 2014; 60(2): 118-24.                                                                                                                        | Country                                                                                                                                                                                            | 2010      | Scientific literature |
|                          |                                                                                                                                                                                                                                                                                                           | Ceará, Espírito Santo, Maranhão, Minas Gerais, Paraíba, Pernambuco, Piauí, Rio Grande do Norte, Rio de Janeiro, Sergipe, São Paulo, Alagoas, Bahia, Ceará, Espírito Santo, Maranhão, Minas Gerais, |           |                       |
| High body-mass index     | Brazil Living Standards Measurement Survey 1996-1997                                                                                                                                                                                                                                                      |                                                                                                                                                                                                    | 1996      | Survey                |
| Low bone mineral density | Zerbini CA, Latorre MR, Jaime PC, Tanaka T, Pippa MG. Bone mineral density in Brazilian men 50 years and older. . 2000; 33(12): 1429-35.                                                                                                                                                                  |                                                                                                                                                                                                    | 1997      | Scientific literature |
| Low bone mineral density | Szejnfeld VL, Atra E, Baracat EC, Aldrighi JM, Civitelli R. Bone density in white Brazilian women: Rapid loss at the time around the menopause. . 1995; 56(3):                                                                                                                                            |                                                                                                                                                                                                    | 1992      | Scientific literature |
| Low bone mineral density | Camargo MBR, Cendoroglo MS, Ramos LR, de Oliveira Latorre M do RD, Saraiva GL, Lage A, Carvalhaes Neto N, Araújo LMQ, Vieira JGH, Lazaretti-Castro M. Bone mineral density and osteoporosis among a predominantly Caucasian elderly population in the city of São Paulo, Brazil. . 2005; 16(11): 1451-60. |                                                                                                                                                                                                    | 1998-1999 | Scientific literature |
| Low bone mineral density | quantitative ultrasound are risk factors for new osteoporotic fracture and total and cardiovascular mortality: a 5-year population-based study of Brazilian elderly women. . 2006; 61(2): 196-203.                                                                                                        |                                                                                                                                                                                                    | 1997-2002 | Scientific literature |
| Impaired kidney function | D, Griep RH, Vidigal PG, Ribeiro AL, Lotufo PA, Mill JG. Chronic kidney disease among adult participants of the ELSA-Brasil cohort: association with race and socioeconomic position. . 2016; 70(4): 380-9.                                                                                               |                                                                                                                                                                                                    | 2008-2010 | Scientific literature |
| Impaired kidney function | Pereira ER, Pereira Ade C, Andrade GB, Naghettini AV, Pinto FK, Batista SR, Marques SM. Prevalence of chronic renal disease in adults attended by the                                                                                                                                                     |                                                                                                                                                                                                    | 2011-2013 | Scientific literature |

Appendix Table 4. Guidelines for Accurate and Transparent Health Estimates Reporting (GATHER) checklist of information that should be included in reports of global health estimates and description of compliance and location of information for “Burden of disease in Brazil, 1990 to 2016: a systematic review for the Global Burden of Disease (GBD) Study 2016.”

| #                                                                                                     | GATHER checklist item                                                                                                                                                                                                                                                                                                                         | Description of compliance                                                                                                                    | Reference                                                                                                                                                                 |
|-------------------------------------------------------------------------------------------------------|-----------------------------------------------------------------------------------------------------------------------------------------------------------------------------------------------------------------------------------------------------------------------------------------------------------------------------------------------|----------------------------------------------------------------------------------------------------------------------------------------------|---------------------------------------------------------------------------------------------------------------------------------------------------------------------------|
| <b>Objectives and funding</b>                                                                         |                                                                                                                                                                                                                                                                                                                                               |                                                                                                                                              |                                                                                                                                                                           |
| 1                                                                                                     | Define the indicators, populations, and time periods for which estimates were made.                                                                                                                                                                                                                                                           | Narrative in the main text and in the methods appendix describing indicators, definitions, and populations                                   | Main text (Methods) and methods appendix                                                                                                                                  |
| 2                                                                                                     | List the funding sources for the work.                                                                                                                                                                                                                                                                                                        | Funding sources listed in summary section                                                                                                    | Summary (Funding)                                                                                                                                                         |
| <b>Data Inputs</b>                                                                                    |                                                                                                                                                                                                                                                                                                                                               |                                                                                                                                              |                                                                                                                                                                           |
| <i>For all data inputs from multiple sources that are synthesized as part of the study:</i>           |                                                                                                                                                                                                                                                                                                                                               |                                                                                                                                              |                                                                                                                                                                           |
| 3                                                                                                     | Describe how the data were identified and how the data were accessed.                                                                                                                                                                                                                                                                         | Narrative of data seeking methods detailed in the GBD 2016 publications* and methods appendices**                                            | GBD 2016 Mortality appendix (pgs 6-9, 21-25, 53, 58-60), Cause of death appendix (pgs 9-13) Years lived with disability (YLDs) appendix (pgs 6-17)                        |
| 4                                                                                                     | Specify the inclusion and exclusion criteria. Identify all ad-hoc exclusions.                                                                                                                                                                                                                                                                 | Narrative of inclusion and exclusion criteria by data type detailed in the GBD 2016 publications* and methods appendices**                   | GBD Mortality appendix (pgs 6-9, 21-25, 53, 58-60) Cause of death appendix (by cause pgs 39-278), YLDs appendix (by cause pgs 34-716)                                     |
| 5                                                                                                     | Provide information on all included data sources and their main characteristics. For each data source used, report reference information or contact name/institution, population represented, data collection method, year(s) of data collection, sex and age range, diagnostic criteria or measurement method, and sample size, as relevant. | An interactive, online data source tool providing metadata for data sources by component, geography, cause, risk, or impairment is available | Online data citation tools <a href="http://ghdx.healthdata.org/">http://ghdx.healthdata.org/</a><br><br>Methods appendix tables 1-4                                       |
| 6                                                                                                     | Identify and describe any categories of input data that have potentially important biases (e.g., based on characteristics listed in item 5).                                                                                                                                                                                                  | A summary of known biases by cause is detailed in the GBD 2016 publications* and methods appendices **                                       | Main Text, Limitations section in GBD Mortality, Cause of death, and YLD papers<br><br>Cause of death appendix (by cause pgs 39-278), YLDs appendix (by cause pgs 34-716) |
| <i>For data inputs that contribute to the analysis but were not synthesized as part of the study:</i> |                                                                                                                                                                                                                                                                                                                                               |                                                                                                                                              |                                                                                                                                                                           |
| 7                                                                                                     | Describe and give sources for any other data inputs.                                                                                                                                                                                                                                                                                          | Sources are included in the online data source tool                                                                                          | Online data citation tools <a href="http://ghdx.healthdata.org/">http://ghdx.healthdata.org/</a>                                                                          |

| <i>For all data inputs:</i> |                                                                                                                                                                                                                                                                                                                                                                                         |                                                                                                                                                                                                                             |                                                                                                                                                                                                                                                                                                                                                                                                  |
|-----------------------------|-----------------------------------------------------------------------------------------------------------------------------------------------------------------------------------------------------------------------------------------------------------------------------------------------------------------------------------------------------------------------------------------|-----------------------------------------------------------------------------------------------------------------------------------------------------------------------------------------------------------------------------|--------------------------------------------------------------------------------------------------------------------------------------------------------------------------------------------------------------------------------------------------------------------------------------------------------------------------------------------------------------------------------------------------|
| 8                           | Provide all data inputs in a file format from which data can be efficiently extracted (e.g., a spreadsheet as opposed to a PDF), including all relevant meta-data listed in item 5. For any data inputs that cannot be shared due to ethical or legal reasons, such as third-party ownership, provide a contact name or the name of the institution that retains the right to the data. | Input data available for download through online tools, including data visualization and data query tools. Input data not available in tools will be made available upon request                                            | Online data visualization tools, data query tools, and the Global Health Data Exchange<br><a href="http://www.healthdata.org/results/data-visualizations">www.healthdata.org/results/data-visualizations</a> ;<br><a href="http://ghdx.healthdata.org/gb-results-tool">http://ghdx.healthdata.org/gb-results-tool</a> ;<br><a href="http://ghdx.healthdata.org/">http://ghdx.healthdata.org/</a> |
| <b>Data analysis</b>        |                                                                                                                                                                                                                                                                                                                                                                                         |                                                                                                                                                                                                                             |                                                                                                                                                                                                                                                                                                                                                                                                  |
| 9                           | Provide a conceptual overview of the data analysis method. A diagram may be helpful.                                                                                                                                                                                                                                                                                                    | Flow diagrams of the overall methodological processes, as well as cause-specific modelling processes, detailed in the GBD 2016 publications* and methods appendices**                                                       | GBD Mortality appendix figure 1, Cause of death appendix figures 1-3, YLDs appendix figures 1-2                                                                                                                                                                                                                                                                                                  |
| 10                          | Provide a detailed description of all steps of the analysis, including mathematical formulae. This description should cover, as relevant, data cleaning, data pre-processing, data adjustments and weighting of data sources, and mathematical or statistical model(s).                                                                                                                 | Flow diagrams and corresponding methodological write-ups for each cause, as well as the demographics and causes of death databases and modelling processes, detailed in the GBD 2016 publications* and methods appendices** | GBD Mortality appendix figure 1, Cause of death appendix figures 1-3, YLDs appendix figures 1-2<br><br>GBD Cause of death appendix (by cause pgs 39-278) YLDs appendix (by cause pgs 34-716)                                                                                                                                                                                                     |
| 11                          | Describe how candidate models were evaluated and how the final model(s) were selected.                                                                                                                                                                                                                                                                                                  | Detailed in the methodological write-ups in the GBD 2016 publications* and methods appendices **                                                                                                                            | GBD Cause of death appendix (by cause pgs 39-278) YLDs appendix (by cause pgs 34-716)                                                                                                                                                                                                                                                                                                            |
| 12                          | Provide the results of an evaluation of model performance, if done, as well as the results of any relevant sensitivity analysis.                                                                                                                                                                                                                                                        | Detailed in the methodological write-up in the GBD 2016 publications* and methods appendices **                                                                                                                             | GBD Cause of death appendix (by cause pgs 39-278) YLDs appendix (by cause pgs 34-716)                                                                                                                                                                                                                                                                                                            |

|                               |                                                                                                                                                                  |                                                                                                                                         |                                                                                                                                                                                                                                                                                                                                                                                                                                                                  |
|-------------------------------|------------------------------------------------------------------------------------------------------------------------------------------------------------------|-----------------------------------------------------------------------------------------------------------------------------------------|------------------------------------------------------------------------------------------------------------------------------------------------------------------------------------------------------------------------------------------------------------------------------------------------------------------------------------------------------------------------------------------------------------------------------------------------------------------|
| 13                            | Describe methods for calculating uncertainty of the estimates. State which sources of uncertainty were, and were not, accounted for in the uncertainty analysis. | Narrative in the main paper<br><br>Further information detailed in the GBD 2016 publications* and methods appendices**                  | Main text (Methods)<br><br>GBD Cause of death appendix (pgs 9, 33-35, YLD appendix (pgs 10, 28-29)                                                                                                                                                                                                                                                                                                                                                               |
| 14                            | State how analytic or statistical source code used to generate estimates can be accessed.                                                                        | Access statement<br>Included in the main paper                                                                                          | Main text (Methods)<br><br>Code is provided in an online repository<br><a href="https://github.com/ihmeuw/ihme-modeling">https://github.com/ihmeuw/ihme-modeling</a>                                                                                                                                                                                                                                                                                             |
| <b>Results and Discussion</b> |                                                                                                                                                                  |                                                                                                                                         |                                                                                                                                                                                                                                                                                                                                                                                                                                                                  |
| 15                            | Provide published estimates in a file format from which data can be efficiently extracted.                                                                       | GBD 2016 results are available through online data visualization tools, the Global Health Data Exchange, and the online data query tool | Main text and online data tools (data visualization tools, data query tools, and the Global Health Data Exchange)<br><a href="http://www.healthdata.org/results/data-visualizations">www.healthdata.org/results/data-visualizations</a> ;<br><a href="http://ghdx.healthdata.org/gb-results-tool">http://ghdx.healthdata.org/gb-results-tool</a> ;<br><a href="http://ghdx.healthdata.org/">http://ghdx.healthdata.org/</a>                                      |
| 16                            | Report a quantitative measure of the uncertainty of the estimates (e.g. uncertainty intervals).                                                                  | Uncertainty intervals provided with all results                                                                                         | Main text (Methods, results), methods appendix and online data tools (data visualization tools, data query tools, and The Global Health Data Exchange)<br><a href="http://www.healthdata.org/results/data-visualizations">www.healthdata.org/results/data-visualizations</a> ;<br><a href="http://ghdx.healthdata.org/gb-results-tool">http://ghdx.healthdata.org/gb-results-tool</a> ;<br><a href="http://ghdx.healthdata.org/">http://ghdx.healthdata.org/</a> |
| 17                            | Interpret results in light of existing evidence. If updating a previous set of estimates, describe the reasons for changes in estimates.                         | Discussion of methodological changes between GBD rounds in the research in context section of the main paper                            | Research in context                                                                                                                                                                                                                                                                                                                                                                                                                                              |
| 18                            | Discuss limitations of the estimates. Include a discussion of any modelling assumptions or data limitations that affect interpretation of the estimates.         | Discussion of limitations in the narrative of the main paper                                                                            | Main text<br>(Discussion, limitations)                                                                                                                                                                                                                                                                                                                                                                                                                           |

*\*Gakidou E, Afshin A, Abajobir AA, et al. Global, regional, and national comparative risk assessment of 84 behavioural, environmental and occupational, and metabolic risks or clusters of risks, 1990–2016: a systematic analysis for the Global Burden of Disease Study 2016. The Lancet 2017; 390: 1345–422.*

*\*\*Supplementary appendix 1*

*\*Hay SI, Abajobir AA, Abate KH, et al. Global, regional, and national disability-adjusted life-years (DALYs) for 333 diseases and injuries and healthy life expectancy (HALE) for 195 countries and territories, 1990–2016: a systematic analysis for the Global Burden of Disease Study 2016. The Lancet 2017; 390: 1260–344.*

**\*\* Supplementary appendix 1**

*\*Naghavi M, Abajobir AA, Abbafati C, et al. Global, regional, and national age-sex specific mortality for 264 causes of death, 1980–2016: a systematic analysis for the Global Burden of Disease Study 2016. The Lancet 2017; 390: 1151–210.*

**\*\* Supplementary appendix 1**

*\*Vos T, Abajobir AA, Abate KH, et al. Global, regional, and national incidence, prevalence, and years lived with disability for 328 diseases and injuries for 195 countries, 1990–2016: a systematic analysis for the Global Burden of Disease Study 2016. The Lancet 2017; 390: 1211–59.*

**\*\* Supplementary appendix 1**

*\*Wang H, Abajobir AA, Abate KH, et al. Global, regional, and national under-5 mortality, adult mortality, age-specific mortality, and life expectancy, 1970–2016: a systematic analysis for the Global Burden of Disease Study 2016. The Lancet 2017; 390: 1084–150.*

**\*\* Supplementary appendix 1**



# Appendix Figure 1

Age-standardized DALY rates (per 100,000) of top GBD level 3 causes in Brazil, its 26 states, and the Federal District, both sexes, 1990\*

|                     | Ischemic heart disease | Interpersonal violence | Low back & neck pain | Stroke | Road injuries | Sense organ diseases | Diabetes | Lower respiratory infect | Skin diseases | Congenital defects | Alzheimer disease | Migraine | COPD   | Depressive disorders | Neonatal preterm birth | Anxiety disorders | Falls | Other musculoskeletal | Chronic kidney disease | Alcohol use disorders | Diarrheal diseases | Neonatal encephalopathy |
|---------------------|------------------------|------------------------|----------------------|--------|---------------|----------------------|----------|--------------------------|---------------|--------------------|-------------------|----------|--------|----------------------|------------------------|-------------------|-------|-----------------------|------------------------|-----------------------|--------------------|-------------------------|
| Brazil              | 3715.5                 | 1478.2                 | 1334.2               | 2730.7 | 1600.4        | 1023.8               | 966.4    | 2034.4                   | 832.4         | 1284.5             | 650.7             | 662.2    | 1080.4 | 677.2                | 1670.2                 | 521.5             | 526.8 | 457.6                 | 530.4                  | 384.0                 | 2012.4             | 612.6                   |
| Acre                | 2796.9                 | 1468.6                 | 1323.9               | 2021.3 | 1379.1        | 1071.2               | 787.0    | 2304.6                   | 786.9         | 1380.7             | 653.8             | 668.8    | 1171.3 | 587.9                | 2257.0                 | 522.8             | 461.9 | 341.4                 | 624.4                  | 380.1                 | 2508.6             | 851.8                   |
| Amapa               | 2326.7                 | 1086.0                 | 1336.1               | 1706.9 | 1120.9        | 1056.2               | 762.8    | 1167.2                   | 814.4         | 1084.8             | 646.0             | 673.2    | 687.8  | 591.6                | 1722.5                 | 526.0             | 356.9 | 338.8                 | 576.1                  | 243.0                 | 1113.0             | 663.3                   |
| Amazonas            | 2431.3                 | 1277.4                 | 1332.2               | 1959.4 | 1199.4        | 1039.9               | 780.9    | 1477.0                   | 818.4         | 1257.4             | 635.7             | 673.0    | 728.1  | 601.3                | 1937.4                 | 525.4             | 427.9 | 387.1                 | 484.2                  | 272.7                 | 2304.1             | 598.0                   |
| Para                | 2572.8                 | 1190.1                 | 1333.8               | 2128.8 | 1353.2        | 1073.3               | 627.6    | 1971.5                   | 815.4         | 1121.7             | 621.7             | 671.3    | 739.5  | 562.4                | 1945.0                 | 525.2             | 441.2 | 357.7                 | 524.1                  | 226.8                 | 2928.5             | 566.3                   |
| Rondonia            | 3801.2                 | 2269.9                 | 1321.6               | 2827.2 | 2220.7        | 1045.9               | 952.3    | 1678.7                   | 820.5         | 1135.7             | 668.8             | 660.5    | 1216.7 | 668.5                | 1631.3                 | 517.1             | 565.9 | 345.8                 | 596.5                  | 310.1                 | 1958.2             | 668.4                   |
| Roraima             | 2857.8                 | 1824.9                 | 1312.7               | 1985.4 | 2205.9        | 1035.9               | 1255.9   | 2156.7                   | 844.8         | 1097.8             | 660.2             | 640.3    | 701.8  | 733.7                | 1996.9                 | 504.8             | 444.8 | 315.1                 | 680.4                  | 297.4                 | 2081.6             | 831.8                   |
| Tocantins           | 2395.7                 | 938.8                  | 1324.7               | 1990.0 | 1643.7        | 1104.7               | 682.5    | 1758.6                   | 817.8         | 1507.2             | 631.2             | 667.9    | 691.5  | 648.1                | 1835.6                 | 522.4             | 406.3 | 321.6                 | 403.9                  | 313.4                 | 1886.5             | 823.5                   |
| Alagoas             | 3196.6                 | 1883.3                 | 1339.3               | 3393.2 | 2049.2        | 1086.6               | 1267.7   | 4090.8                   | 804.9         | 1618.8             | 638.4             | 682.4    | 1019.6 | 667.2                | 2108.7                 | 531.8             | 483.9 | 380.5                 | 591.0                  | 315.4                 | 5944.8             | 986.0                   |
| Bahia               | 2673.6                 | 905.2                  | 1415.5               | 2169.7 | 1282.1        | 1068.6               | 1009.2   | 2083.6                   | 878.4         | 875.0              | 622.5             | 681.0    | 753.2  | 557.7                | 2332.8                 | 531.1             | 491.5 | 340.9                 | 508.7                  | 374.4                 | 3766.7             | 646.4                   |
| Ceara               | 1881.7                 | 956.7                  | 1345.7               | 1715.8 | 1381.8        | 1077.8               | 573.4    | 2983.6                   | 818.9         | 2033.0             | 605.5             | 688.3    | 560.3  | 659.3                | 2211.1                 | 535.2             | 460.4 | 337.0                 | 309.5                  | 372.5                 | 4723.5             | 715.0                   |
| Maranhao            | 2222.3                 | 1248.3                 | 1331.7               | 2220.5 | 1587.2        | 1104.3               | 843.5    | 2561.1                   | 807.1         | 1538.3             | 610.9             | 678.0    | 586.1  | 623.1                | 1969.1                 | 528.9             | 408.5 | 332.3                 | 520.5                  | 294.4                 | 3838.8             | 1306.3                  |
| Paraiba             | 2713.6                 | 1225.1                 | 1347.8               | 2075.6 | 1324.0        | 1075.4               | 995.8    | 2280.7                   | 819.0         | 1809.7             | 643.4             | 690.3    | 733.7  | 632.1                | 1345.3                 | 536.3             | 349.2 | 379.9                 | 559.9                  | 338.7                 | 2493.3             | 743.5                   |
| Pernambuco          | 3623.8                 | 2372.1                 | 1343.2               | 2964.0 | 1544.7        | 1055.9               | 1214.1   | 3036.6                   | 820.9         | 1875.6             | 642.2             | 687.5    | 993.6  | 705.6                | 2090.4                 | 534.2             | 411.2 | 332.3                 | 538.1                  | 394.9                 | 4540.8             | 643.9                   |
| Piaui               | 2098.1                 | 674.6                  | 1342.2               | 2077.0 | 1264.6        | 1093.6               | 615.3    | 1751.4                   | 798.0         | 1282.2             | 617.2             | 685.3    | 516.9  | 630.2                | 1935.2                 | 533.3             | 331.8 | 362.1                 | 326.0                  | 272.2                 | 3067.8             | 687.1                   |
| Rio Grande do Norte | 2326.4                 | 875.1                  | 1344.8               | 1567.5 | 1373.2        | 1064.4               | 900.9    | 2369.2                   | 834.2         | 1610.7             | 636.7             | 686.6    | 404.9  | 683.5                | 2010.6                 | 533.9             | 324.1 | 345.5                 | 355.5                  | 321.9                 | 3179.3             | 633.5                   |
| Sergipe             | 2512.1                 | 1412.1                 | 1336.7               | 2500.2 | 1789.9        | 1060.2               | 1363.2   | 1861.3                   | 820.9         | 1417.1             | 650.7             | 683.5    | 775.1  | 669.4                | 2195.7                 | 532.3             | 494.3 | 351.0                 | 561.4                  | 501.4                 | 3769.1             | 862.8                   |
| Distrito Federal    | 3228.8                 | 1449.3                 | 1350.4               | 2314.3 | 1869.2        | 937.4                | 961.7    | 1074.0                   | 842.3         | 1247.1             | 663.1             | 688.4    | 863.2  | 642.5                | 1132.4                 | 535.2             | 610.3 | 389.3                 | 516.0                  | 399.3                 | 595.7              | 552.0                   |
| Goias               | 3526.6                 | 1532.2                 | 1331.0               | 2905.8 | 2291.6        | 1037.6               | 797.9    | 1393.2                   | 821.2         | 1212.0             | 651.3             | 673.8    | 1626.6 | 732.4                | 1362.1                 | 525.5             | 591.9 | 339.5                 | 552.5                  | 374.2                 | 886.0              | 453.6                   |
| Mato Grosso         | 3567.4                 | 1373.6                 | 1326.9               | 2000.1 | 1937.2        | 1033.8               | 769.5    | 1489.0                   | 825.0         | 1086.0             | 650.2             | 662.7    | 932.5  | 613.0                | 1663.3                 | 519.1             | 540.1 | 326.5                 | 528.4                  | 294.6                 | 1263.3             | 429.3                   |
| Mato Grosso do Sul  | 3869.3                 | 1438.8                 | 1334.5               | 2714.0 | 1745.2        | 1023.9               | 761.5    | 1419.1                   | 820.1         | 1068.1             | 654.2             | 672.5    | 995.5  | 696.9                | 1316.4                 | 525.3             | 566.9 | 355.6                 | 531.0                  | 377.9                 | 944.1              | 417.1                   |
| Espirito Santo      | 3590.7                 | 1892.4                 | 1334.5               | 3490.7 | 1925.0        | 1006.8               | 859.3    | 1183.4                   | 839.5         | 1496.6             | 648.3             | 677.7    | 967.3  | 632.5                | 1468.6                 | 528.8             | 669.3 | 335.7                 | 526.4                  | 437.6                 | 1025.0             | 568.2                   |
| Minas Gerais        | 3828.2                 | 964.0                  | 1333.1               | 2977.4 | 1406.5        | 1025.6               | 951.3    | 1628.7                   | 815.6         | 1265.0             | 646.0             | 648.4    | 1334.2 | 679.5                | 1852.2                 | 529.2             | 510.2 | 366.3                 | 624.7                  | 501.1                 | 979.3              | 526.4                   |
| Rio de Janeiro      | 5149.6                 | 2919.5                 | 1344.3               | 3649.0 | 1730.7        | 978.7                | 1411.6   | 2118.4                   | 859.8         | 1194.2             | 647.8             | 687.5    | 1264.7 | 672.1                | 1579.0                 | 534.8             | 582.8 | 368.3                 | 616.7                  | 358.3                 | 806.2              | 460.3                   |
| Sao Paulo           | 4343.5                 | 1687.3                 | 1335.8               | 2614.7 | 1666.4        | 983.1                | 972.4    | 2014.5                   | 828.3         | 1143.2             | 695.8             | 608.5    | 1062.0 | 701.2                | 1287.2                 | 490.7             | 657.2 | 805.9                 | 548.2                  | 431.1                 | 670.2              | 563.5                   |
| Parana              | 4197.0                 | 1069.9                 | 1338.2               | 3491.8 | 1778.7        | 1017.6               | 841.4    | 1236.0                   | 799.6         | 1169.2             | 653.2             | 678.0    | 1418.9 | 700.0                | 1119.5                 | 528.8             | 536.4 | 312.7                 | 471.4                  | 394.0                 | 988.0              | 491.4                   |
| Rio Grande do Sul   | 4195.0                 | 1131.5                 | 1206.6               | 2743.5 | 1231.9        | 1001.1               | 759.2    | 1238.1                   | 859.7         | 952.0              | 655.4             | 697.2    | 1562.1 | 777.0                | 933.4                  | 531.4             | 437.2 | 366.9                 | 468.0                  | 303.7                 | 436.8              | 384.2                   |
| Santa Catarina      | 3882.0                 | 806.3                  | 1338.1               | 2963.3 | 2084.7        | 1021.3               | 853.0    | 1355.2                   | 825.4         | 1286.5             | 647.9             | 677.7    | 1595.9 | 782.7                | 1090.7                 | 528.8             | 416.3 | 349.8                 | 457.2                  | 296.7                 | 851.2              | 495.4                   |

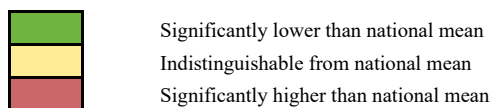

\*Diarrheal diseases and neonatal encephalopathy are also included, where they were top causes of DALYs in 1990 but were not a leading cause in 2016.

DALYs: Disability-adjusted life-years; GBD: Global burden of disease; COPD: Chronic obstructive pulmonary disease

## Appendix Figure 2

Age-standardized DALY rates (per 100,000) of top GBD level 3 causes in Brazil, its 26 states, and the Federal District, both sexes, 2016\*

|                     | Ischemic heart disease | Interpersonal violence | Low back & neck pain | Stroke | Road injuries | Sense organ diseases | Diabetes | Lower respiratory infect | Skin diseases | Congenital defects | Alzheimer disease | Migraine | COPD  | Depressive disorders | Neonatal preterm birth | Anxiety disorders | Falls | Other musculoskeletal | Chronic kidney disease | Alcohol use disorders | Diarrheal diseases | Neonatal encephalopathy |
|---------------------|------------------------|------------------------|----------------------|--------|---------------|----------------------|----------|--------------------------|---------------|--------------------|-------------------|----------|-------|----------------------|------------------------|-------------------|-------|-----------------------|------------------------|-----------------------|--------------------|-------------------------|
| Brazil              | 1927.1                 | 1488.7                 | 1275.8               | 1169.9 | 1151.5        | 973.4                | 882.1    | 869.8                    | 865.0         | 790.7              | 671.3             | 657.9    | 633.1 | 620.2                | 580.6                  | 572.2             | 511.7 | 475.3                 | 459.7                  | 413.0                 | 319.9              | 300.9                   |
| Acre                | 1718.1                 | 1491.5                 | 1270.5               | 1284.8 | 1036.3        | 997.9                | 946.0    | 1123.0                   | 821.6         | 953.8              | 664.5             | 668.7    | 970.4 | 582.9                | 918.9                  | 577.8             | 565.9 | 342.1                 | 672.4                  | 428.4                 | 493.5              | 471.3                   |
| Amapa               | 1615.3                 | 1763.1                 | 1274.6               | 1293.1 | 1018.1        | 985.3                | 947.0    | 911.6                    | 862.6         | 786.1              | 665.3             | 669.1    | 569.0 | 594.6                | 751.1                  | 578.0             | 414.3 | 344.3                 | 658.3                  | 299.3                 | 273.4              | 468.8                   |
| Amazonas            | 1542.7                 | 1670.7                 | 1276.8               | 1260.8 | 790.9         | 979.4                | 997.7    | 937.4                    | 858.3         | 798.4              | 654.7             | 670.5    | 564.7 | 556.4                | 582.4                  | 579.4             | 455.4 | 416.7                 | 576.8                  | 330.2                 | 408.9              | 331.6                   |
| Para                | 1857.3                 | 1915.6                 | 1271.7               | 1407.1 | 1167.4        | 1006.9               | 1039.8   | 1038.7                   | 853.3         | 623.2              | 637.8             | 668.0    | 634.6 | 507.6                | 559.7                  | 577.3             | 376.2 | 390.2                 | 537.5                  | 270.9                 | 495.1              | 288.9                   |
| Rondonia            | 2033.8                 | 1516.9                 | 1272.7               | 1196.3 | 1466.6        | 978.0                | 977.5    | 731.0                    | 850.0         | 700.0              | 672.9             | 668.2    | 773.0 | 613.1                | 520.3                  | 576.6             | 493.0 | 343.1                 | 579.9                  | 313.0                 | 322.1              | 309.3                   |
| Roraima             | 1708.6                 | 1493.4                 | 1269.2               | 1068.5 | 1574.3        | 980.3                | 1295.2   | 1271.9                   | 885.7         | 761.1              | 678.3             | 665.1    | 486.6 | 717.1                | 756.4                  | 574.6             | 447.8 | 316.3                 | 653.7                  | 317.2                 | 389.1              | 388.4                   |
| Tocantins           | 1987.5                 | 1277.7                 | 1266.5               | 1369.4 | 1716.7        | 1036.3               | 1022.4   | 632.9                    | 848.8         | 880.9              | 646.6             | 667.1    | 519.4 | 642.1                | 622.8                  | 576.1             | 527.0 | 315.4                 | 514.4                  | 447.3                 | 320.0              | 416.5                   |
| Alagoas             | 2247.1                 | 2573.6                 | 1279.4               | 1662.0 | 1294.5        | 1009.2               | 1513.7   | 886.2                    | 843.3         | 660.9              | 644.2             | 679.1    | 635.0 | 691.5                | 507.8                  | 585.9             | 422.4 | 390.2                 | 560.8                  | 436.1                 | 515.2              | 263.9                   |
| Bahia               | 1720.8                 | 1887.9                 | 1390.3               | 1196.6 | 1090.6        | 998.0                | 1099.4   | 760.8                    | 909.8         | 863.6              | 628.2             | 673.5    | 580.4 | 544.8                | 704.8                  | 581.7             | 477.4 | 349.0                 | 510.9                  | 517.0                 | 471.3              | 355.4                   |
| Ceara               | 1865.2                 | 1894.9                 | 1279.9               | 1262.3 | 1507.6        | 1003.2               | 857.2    | 892.9                    | 865.2         | 933.0              | 647.7             | 676.9    | 477.5 | 644.9                | 674.4                  | 584.2             | 458.1 | 362.9                 | 396.4                  | 631.5                 | 446.0              | 326.3                   |
| Maranhao            | 2148.0                 | 1567.4                 | 1272.2               | 1602.9 | 1401.2        | 1014.4               | 1283.4   | 860.2                    | 845.1         | 925.4              | 624.3             | 674.3    | 426.3 | 601.0                | 613.0                  | 582.5             | 415.4 | 348.4                 | 535.0                  | 369.4                 | 578.8              | 484.9                   |
| Paraiba             | 2253.5                 | 1782.8                 | 1280.6               | 1254.2 | 1279.6        | 1003.7               | 1259.3   | 828.1                    | 853.6         | 837.3              | 647.9             | 680.0    | 537.3 | 615.7                | 441.1                  | 586.4             | 370.7 | 379.1                 | 534.9                  | 415.9                 | 414.7              | 245.6                   |
| Pernambuco          | 2375.8                 | 2054.2                 | 1278.9               | 1328.3 | 1214.9        | 994.4                | 1211.3   | 801.4                    | 855.3         | 923.9              | 649.1             | 679.4    | 885.4 | 692.4                | 552.5                  | 586.0             | 357.8 | 348.3                 | 454.0                  | 475.9                 | 467.0              | 350.0                   |
| Piaui               | 2145.8                 | 1065.8                 | 1274.3               | 1567.3 | 1670.3        | 1016.5               | 1134.5   | 720.4                    | 833.0         | 895.5              | 646.8             | 677.6    | 425.6 | 592.1                | 691.3                  | 583.9             | 443.9 | 368.4                 | 462.3                  | 461.5                 | 399.4              | 496.0                   |
| Rio Grande do Norte | 1965.7                 | 1715.7                 | 1279.6               | 942.8  | 1101.9        | 990.7                | 1202.3   | 718.1                    | 868.1         | 749.5              | 639.8             | 675.4    | 360.8 | 651.5                | 594.7                  | 582.6             | 408.1 | 350.5                 | 430.1                  | 446.6                 | 460.4              | 261.7                   |
| Sergipe             | 1937.2                 | 1956.3                 | 1278.6               | 1429.6 | 1448.8        | 986.3                | 1387.0   | 806.5                    | 872.2         | 911.6              | 650.3             | 676.7    | 549.8 | 615.6                | 729.2                  | 584.1             | 503.6 | 352.5                 | 544.1                  | 677.4                 | 369.7              | 496.6                   |
| Distrito Federal    | 1351.6                 | 1387.2                 | 1291.7               | 888.3  | 931.6         | 895.4                | 671.4    | 502.6                    | 872.3         | 872.5              | 640.7             | 688.6    | 433.2 | 612.0                | 533.2                  | 592.3             | 541.8 | 378.4                 | 415.2                  | 435.6                 | 207.1              | 263.1                   |
| Goias               | 2086.7                 | 1895.6                 | 1271.2               | 1140.7 | 1586.2        | 975.1                | 822.8    | 844.9                    | 852.7         | 850.0              | 651.8             | 671.0    | 882.4 | 650.8                | 627.9                  | 578.8             | 641.9 | 326.6                 | 517.5                  | 452.9                 | 277.9              | 293.7                   |
| Mato Grosso         | 2031.9                 | 1691.6                 | 1270.7               | 1222.0 | 1692.9        | 969.3                | 1015.0   | 794.4                    | 858.4         | 667.2              | 658.5             | 665.8    | 783.4 | 593.1                | 470.7                  | 574.9             | 532.0 | 344.9                 | 550.9                  | 411.2                 | 296.2              | 226.6                   |
| Mato Grosso do Sul  | 2213.4                 | 1338.5                 | 1276.9               | 1247.6 | 1354.2        | 965.7                | 815.8    | 795.7                    | 856.5         | 662.0              | 659.2             | 671.3    | 643.6 | 637.0                | 403.6                  | 579.1             | 613.8 | 339.6                 | 499.8                  | 424.6                 | 276.4              | 208.4                   |
| Espirito Santo      | 1735.5                 | 2038.4                 | 1273.9               | 1187.0 | 1360.9        | 955.7                | 806.6    | 609.9                    | 870.7         | 948.8              | 650.4             | 671.7    | 479.2 | 618.7                | 476.8                  | 579.7             | 611.6 | 336.2                 | 467.6                  | 492.1                 | 246.7              | 316.8                   |
| Minas Gerais        | 1671.9                 | 1265.1                 | 1272.3               | 1110.6 | 1129.5        | 975.5                | 750.2    | 798.7                    | 847.4         | 790.9              | 646.9             | 640.4    | 586.5 | 623.5                | 707.5                  | 580.1             | 484.6 | 363.2                 | 444.4                  | 554.6                 | 255.1              | 275.6                   |
| Rio de Janeiro      | 2348.6                 | 1786.2                 | 1289.7               | 1281.0 | 1023.2        | 944.4                | 1063.6   | 1116.8                   | 896.3         | 745.6              | 655.8             | 678.3    | 638.0 | 580.8                | 524.3                  | 585.0             | 469.2 | 390.2                 | 580.8                  | 315.0                 | 213.3              | 300.4                   |
| Sao Paulo           | 1908.0                 | 965.4                  | 1275.3               | 1022.0 | 874.9         | 963.0                | 643.4    | 933.1                    | 857.5         | 688.9              | 743.2             | 606.0    | 597.8 | 612.4                | 531.6                  | 537.7             | 599.6 | 876.6                 | 392.2                  | 310.4                 | 198.8              | 230.8                   |
| Parana              | 1892.0                 | 1468.5                 | 1275.4               | 1193.0 | 1395.1        | 958.7                | 900.4    | 641.0                    | 835.1         | 793.3              | 655.9             | 674.5    | 782.3 | 626.8                | 490.3                  | 581.3             | 628.0 | 303.5                 | 417.5                  | 460.7                 | 250.6              | 261.5                   |
| Rio Grande do Sul   | 1787.2                 | 1217.6                 | 1122.8               | 1112.2 | 923.2         | 957.2                | 743.2    | 652.0                    | 890.9         | 749.3              | 659.3             | 707.3    | 810.4 | 700.7                | 475.5                  | 581.9             | 494.6 | 352.0                 | 398.2                  | 361.3                 | 192.7              | 232.3                   |
| Santa Catarina      | 1736.8                 | 802.0                  | 1275.7               | 962.3  | 1380.8        | 959.7                | 748.8    | 685.0                    | 854.7         | 895.3              | 649.2             | 670.7    | 740.0 | 757.6                | 537.2                  | 578.9             | 433.8 | 339.7                 | 371.4                  | 347.5                 | 237.8              | 262.3                   |

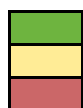

Significantly lower than national mean  
 Indistinguishable from national mean  
 Significantly higher than national mean

\*Diarrheal diseases and neonatal encephalopathy are also included, where they were top causes of DALYs in 1990 but were not a leading cause in 2016.

DALYs: Disability-adjusted life-years; GBD: Global burden of disease; COPD: Chronic obstructive pulmonary disease

## Appendix Figure 3

Ranking of top GBD level 3 causes of age-standardized DALYs in Brazil and comparator countries, both sexes, 2016

|                                       | Brazil | Russia | India  | China  | South Africa | Mexico | Argentina | Colombia | Australia | Canada | England |
|---------------------------------------|--------|--------|--------|--------|--------------|--------|-----------|----------|-----------|--------|---------|
| Ischemic heart disease                | 1927.1 | 5240.0 | 4111.3 | 2002.1 | 1835.3       | 1700.7 | 1870.3    | 1650.5   | 983.1     | 1152.0 | 1139.0  |
| Interpersonal violence                | 1488.7 | 747.1  | 217.8  | 108.3  | 1871.6       | 830.8  | 343.1     | 1745.7   | 94.2      | 124.6  | 54.2    |
| Low back and neck pain                | 1275.8 | 1382.1 | 909.0  | 986.6  | 1104.6       | 909.7  | 1570.5    | 1009.7   | 1493.7    | 1372.5 | 1819.9  |
| Stroke                                | 1169.9 | 2939.5 | 1694.1 | 2523.2 | 1413.2       | 616.3  | 934.5     | 608.7    | 469.2     | 503.9  | 569.9   |
| Road injuries                         | 1151.5 | 1078.5 | 1017.9 | 1039.3 | 2088.9       | 839.4  | 736.1     | 729.0    | 431.4     | 463.3  | 281.9   |
| Sense organ diseases                  | 973.4  | 899.8  | 1315.1 | 873.2  | 1118.8       | 1009.1 | 723.5     | 1067.0   | 563.4     | 562.7  | 666.7   |
| Diabetes mellitus                     | 882.1  | 390.3  | 1059.4 | 513.7  | 2325.8       | 2213.0 | 696.9     | 694.6    | 407.9     | 547.1  | 288.9   |
| Lower respiratory infections          | 869.8  | 742.5  | 1868.3 | 375.2  | 2536.5       | 560.9  | 941.8     | 456.8    | 134.9     | 178.4  | 338.6   |
| Skin and subcutaneous diseases        | 865.0  | 737.5  | 674.3  | 703.0  | 913.2        | 744.8  | 906.3     | 802.0    | 911.8     | 1076.0 | 1067.9  |
| Congenital birth defects              | 790.7  | 521.3  | 684.7  | 565.9  | 507.6        | 811.0  | 636.5     | 669.2    | 292.7     | 355.1  | 349.9   |
| Alzheimer disease and other dementias | 671.3  | 325.1  | 304.0  | 529.6  | 386.8        | 492.7  | 322.9     | 474.4    | 366.1     | 333.1  | 440.0   |
| Migraine                              | 657.9  | 704.4  | 722.6  | 380.6  | 504.8        | 638.7  | 670.7     | 660.2    | 739.8     | 685.0  | 719.1   |
| Chronic obstructive pulmonary disease | 633.1  | 341.4  | 2432.1 | 1063.9 | 931.4        | 482.3  | 547.7     | 559.2    | 371.7     | 336.8  | 507.4   |
| Depressive disorders                  | 620.2  | 625.7  | 627.3  | 539.5  | 688.2        | 489.1  | 588.2     | 394.4    | 775.9     | 589.0  | 664.1   |
| Neonatal preterm birth complications  | 580.6  | 238.9  | 1308.0 | 486.5  | 837.4        | 500.2  | 574.5     | 559.7    | 187.2     | 296.9  | 349.4   |
| Anxiety disorders                     | 572.2  | 268.1  | 310.9  | 291.4  | 358.2        | 282.1  | 568.2     | 242.0    | 570.4     | 481.9  | 435.4   |
| Falls                                 | 511.7  | 903.7  | 839.4  | 365.4  | 192.9        | 382.3  | 306.9     | 317.5    | 364.0     | 414.0  | 449.5   |
| Other musculoskeletal disorders       | 475.3  | 96.1   | 625.6  | 312.1  | 304.3        | 418.7  | 643.4     | 423.9    | 648.1     | 596.3  | 352.4   |
| Chronic kidney disease                | 459.7  | 228.3  | 727.9  | 322.5  | 791.3        | 1563.3 | 501.6     | 496.7    | 185.5     | 203.6  | 123.1   |
| Alcohol use disorders                 | 413.0  | 1119.2 | 199.2  | 149.7  | 197.1        | 263.0  | 215.8     | 178.4    | 170.6     | 212.4  | 170.5   |
| Oral disorders                        | 366.9  | 322.7  | 296.5  | 184.5  | 282.7        | 355.7  | 284.8     | 345.5    | 317.4     | 296.4  | 354.9   |
| Iron-deficiency anemia                | 361.9  | 88.1   | 1231.4 | 85.0   | 275.0        | 115.3  | 124.4     | 84.7     | 31.2      | 38.6   | 84.3    |
| Tracheal, bronchus, and lung cancer   | 334.8  | 581.2  | 171.2  | 799.3  | 446.6        | 179.5  | 534.8     | 233.7    | 488.9     | 738.6  | 633.1   |
| HIV/AIDS                              | 322.1  | 605.0  | 362.0  | 88.0   | 16894.2      | 197.2  | 200.5     | 223.9    | 22.4      | 52.7   | 24.5    |
| Diarrheal diseases                    | 319.9  | 91.2   | 2162.5 | 61.0   | 1274.3       | 207.4  | 95.7      | 180.9    | 24.0      | 48.4   | 49.8    |

Rank

|   |     |     |      |       |     |
|---|-----|-----|------|-------|-----|
| 1 | 2-3 | 4-6 | 7-10 | 11-17 | 18+ |
|---|-----|-----|------|-------|-----|

GBD: Global burden of disease; DALYs: Disability-adjusted life-years; HIV/AIDS: Human immunodeficiency virus/ Acquired immune deficiency syndrome

# Appendix Figure 4

Ratio of observed and expected (O:E) age-standardized disability-adjusted life-year (DALY) rates in Brazil and comparator countries, both sexes, 2016

|              |      | Ischemic heart disease | Interpersonal violence | Low back and neck pain | Stroke | Road injuries | Sense organ diseases | Diabetes mellitus | Lower respiratory infections | Skin and subcutaneous diseases | Congenital birth defects | Alzheimer disease and other dementias | Migraine | Chronic obstructive pulmonary disease | Depressive disorders | Neonatal preterm birth complications | Anxiety disorders | Falls | Other musculoskeletal disorders | Chronic kidney disease | Alcohol use disorders |
|--------------|------|------------------------|------------------------|------------------------|--------|---------------|----------------------|-------------------|------------------------------|--------------------------------|--------------------------|---------------------------------------|----------|---------------------------------------|----------------------|--------------------------------------|-------------------|-------|---------------------------------|------------------------|-----------------------|
| Brazil       | 1990 | 0.87                   | 2.58                   | 1.16                   | 0.94   | 1.05          | 0.88                 | 0.72              | 0.90                         | 1.12                           | 1.28                     | 1.26                                  | 1.11     | 0.77                                  | 1.09                 | 1.19                                 | 1.41              | 1.20  | 1.03                            | 0.68                   | 1.47                  |
|              | 2016 | 0.53                   | 4.28                   | 0.95                   | 0.60   | 1.03          | 1.04                 | 1.04              | 1.10                         | 1.05                           | 1.02                     | 1.32                                  | 1.01     | 0.73                                  | 1.01                 | 0.80                                 | 1.43              | 1.05  | 1.30                            | 1.04                   | 1.70                  |
| Russia       | 1990 | 1.68                   | 3.44                   | 1.05                   | 2.37   | 1.50          | 1.11                 | 0.58              | 1.32                         | 0.82                           | 1.60                     | 0.66                                  | 1.04     | 0.89                                  | 1.06                 | 1.43                                 | 0.66              | 1.82  | 0.33                            | 0.66                   | 4.35                  |
|              | 2016 | 1.78                   | 3.82                   | 0.92                   | 2.20   | 1.33          | 1.20                 | 0.67              | 1.87                         | 0.85                           | 1.01                     | 0.70                                  | 1.03     | 0.65                                  | 1.03                 | 0.66                                 | 0.65              | 1.69  | 0.33                            | 0.83                   | 5.15                  |
| India        | 1990 | 0.94                   | 0.61                   | 0.87                   | 0.69   | 0.65          | 1.06                 | 0.62              | 0.90                         | 0.86                           | 0.90                     | 0.55                                  | 1.26     | 2.27                                  | 1.01                 | 1.22                                 | 0.95              | 1.69  | 1.67                            | 0.92                   | 0.98                  |
|              | 2016 | 1.00                   | 0.40                   | 0.77                   | 0.63   | 0.71          | 1.18                 | 0.86              | 1.07                         | 0.89                           | 0.70                     | 0.59                                  | 1.19     | 1.90                                  | 1.01                 | 1.05                                 | 0.82              | 1.92  | 1.43                            | 1.05                   | 0.76                  |
| China        | 1990 | 0.42                   | 0.47                   | 1.00                   | 1.41   | 0.80          | 0.75                 | 0.36              | 0.97                         | 0.93                           | 1.14                     | 1.02                                  | 0.65     | 2.45                                  | 0.99                 | 1.10                                 | 0.83              | 0.89  | 0.78                            | 0.55                   | 0.55                  |
|              | 2016 | 0.56                   | 0.34                   | 0.72                   | 1.36   | 0.97          | 0.96                 | 0.64              | 0.52                         | 0.85                           | 0.77                     | 1.05                                  | 0.58     | 1.31                                  | 0.88                 | 0.72                                 | 0.72              | 0.74  | 0.88                            | 0.78                   | 0.62                  |
| South Africa | 1990 | 0.46                   | 4.96                   | 0.93                   | 0.60   | 1.89          | 1.05                 | 1.31              | 2.44                         | 1.20                           | 0.74                     | 0.73                                  | 0.84     | 0.84                                  | 1.15                 | 1.01                                 | 0.95              | 0.47  | 0.67                            | 1.02                   | 1.02                  |
|              | 2016 | 0.52                   | 6.09                   | 0.80                   | 0.78   | 2.00          | 1.25                 | 2.98              | 3.73                         | 1.10                           | 0.71                     | 0.77                                  | 0.76     | 1.19                                  | 1.12                 | 1.32                                 | 0.89              | 0.39  | 0.87                            | 1.99                   | 0.83                  |
| Mexico       | 1990 | 0.46                   | 1.99                   | 0.81                   | 0.33   | 0.97          | 0.94                 | 1.78              | 0.83                         | 0.96                           | 1.03                     | 1.01                                  | 1.07     | 0.44                                  | 0.75                 | 0.68                                 | 0.71              | 1.30  | 0.79                            | 1.13                   | 1.76                  |
|              | 2016 | 0.48                   | 2.70                   | 0.66                   | 0.34   | 0.80          | 1.13                 | 2.84              | 0.83                         | 0.89                           | 1.13                     | 0.98                                  | 0.97     | 0.62                                  | 0.79                 | 0.79                                 | 0.70              | 0.76  | 1.20                            | 3.92                   | 1.11                  |
| Argentina    | 1990 | 0.88                   | 0.77                   | 1.26                   | 0.88   | 0.58          | 0.77                 | 0.65              | 0.75                         | 1.06                           | 1.15                     | 0.65                                  | 1.08     | 0.54                                  | 0.95                 | 1.42                                 | 1.47              | 0.77  | 1.53                            | 1.09                   | 1.12                  |
|              | 2016 | 0.55                   | 1.26                   | 1.11                   | 0.56   | 0.75          | 0.85                 | 0.97              | 1.60                         | 1.07                           | 0.97                     | 0.65                                  | 1.00     | 0.77                                  | 0.96                 | 1.05                                 | 1.39              | 0.60  | 1.94                            | 1.39                   | 0.93                  |
| Colombia     | 1990 | 0.73                   | 6.37                   | 0.88                   | 0.51   | 0.86          | 1.04                 | 0.65              | 0.52                         | 1.04                           | 0.77                     | 0.99                                  | 1.10     | 0.50                                  | 0.68                 | 0.84                                 | 0.71              | 1.03  | 0.88                            | 0.93                   | 0.58                  |
|              | 2016 | 0.45                   | 4.90                   | 0.75                   | 0.31   | 0.65          | 1.13                 | 0.80              | 0.56                         | 0.98                           | 0.85                     | 0.93                                  | 1.02     | 0.64                                  | 0.64                 | 0.75                                 | 0.61              | 0.66  | 1.15                            | 1.10                   | 0.73                  |
| Australia    | 1990 | 1.02                   | 0.70                   | 0.98                   | 0.70   | 1.18          | 0.74                 | 0.72              | 0.43                         | 1.01                           | 0.97                     | 0.85                                  | 1.09     | 1.10                                  | 1.27                 | 1.06                                 | 1.39              | 0.64  | 2.67                            | 0.71                   | 0.75                  |
|              | 2016 | 0.40                   | 0.63                   | 0.97                   | 0.44   | 0.63          | 0.83                 | 0.81              | 0.48                         | 1.04                           | 0.69                     | 0.87                                  | 1.07     | 0.93                                  | 1.31                 | 0.72                                 | 1.37              | 0.68  | 2.41                            | 0.84                   | 0.83                  |
| Canada       | 1990 | 1.00                   | 0.86                   | 0.95                   | 0.63   | 1.21          | 0.72                 | 1.02              | 0.79                         | 1.19                           | 1.11                     | 0.77                                  | 1.07     | 0.87                                  | 1.02                 | 1.13                                 | 1.27              | 0.75  | 1.99                            | 0.81                   | 0.97                  |
|              | 2016 | 0.50                   | 0.90                   | 0.89                   | 0.50   | 0.71          | 0.86                 | 1.14              | 0.72                         | 1.23                           | 0.88                     | 0.82                                  | 0.99     | 0.93                                  | 1.00                 | 1.26                                 | 1.15              | 0.77  | 2.28                            | 1.00                   | 1.05                  |
| England      | 1990 | 1.08                   | 0.28                   | 1.28                   | 0.73   | 0.65          | 0.77                 | 0.56              | 0.95                         | 1.21                           | 0.92                     | 0.98                                  | 1.08     | 0.97                                  | 1.16                 | 0.95                                 | 1.05              | 0.84  | 1.06                            | 0.43                   | 0.59                  |
|              | 2016 | 0.43                   | 0.32                   | 1.19                   | 0.48   | 0.38          | 0.94                 | 0.54              | 1.04                         | 1.22                           | 0.76                     | 1.00                                  | 1.04     | 1.13                                  | 1.11                 | 1.17                                 | 1.05              | 0.84  | 1.27                            | 0.51                   | 0.81                  |

 O:E < 0.5  
 O:E 0.5 - 0.99

 O:E 1 - 1.99  
 O:E 2 - 4.99

 O:E ≥ 5

## Methods

The Global Burden of Disease (GBD) 2016 study organises causes of mortality and morbidity within a four-level classification hierarchy to produce estimates that are mutually exclusive and collectively exhaustive. The full GBD cause hierarchy, including corresponding International Classification of Diseases (ICD)-9 and ICD-10 codes, is detailed in the respective GBD 2016 publications. Risk factors are likewise organized in a four-tier hierarchy. The GBD 2016 included substantial methodological improvements from 2015, as described in detail in the GBD mortality, cause of death, years lived with disability (YLDs), disability-adjusted life years (DALYs) and healthy life expectancy (HALE), and risk factor publications (see “research in context” sections).<sup>1</sup>

### 1. Data

Data for all-cause mortality models were derived from vital registration systems, survey data, census data, birth histories, and sibling histories where complete vital registration information was not available. Cause-specific data included a comprehensive set of sources that met quality inclusion criteria, such as vital registration, disease registries, and verbal autopsy from 1980 to 2016. A complete list of data sources used in Brazil cause-specific mortality estimates is provided in Appendix Table 1, categorized by type of data source (vital registration, verbal autopsy, surveillance, sibling history, survey/census, cancer registry, or police records). Data on nonfatal outcomes come from published studies, survey data, ministry of health and central statistical office webpages, epidemiological surveillance data, and hospital inpatient data. A complete list of data sources used in Brazil morbidity estimates by cause is provided in Appendix Table 2, including the coverage level, year, and type of data source. Data on risks come primarily from published studies, surveys, censuses, and satellite data. A complete list of data sources used in Brazil risk factor estimates by risk is provided in Appendix Table 3, including the coverage level, year, and type of data source.

Inclusion and exclusion criteria for all-cause mortality and cause-specific mortality and morbidity data is available in the GBD mortality appendix, cause of death appendix, and YLDs appendix.<sup>2</sup>

Detailed information about deaths in Brazil was mainly obtained from the Mortality Information System (Sistema de Informações sobre Mortalidade, SIM) database.<sup>3</sup> Population censuses and intercensal estimates were provided by the Brazilian Institute of Geography and Statistics (Instituto Brasileiro de Geografia e Estatística, IBGE).<sup>4</sup>

---

<sup>1</sup> Wang H, Abajobir AA, Abate KH, et al. Global, regional, and national under-5 mortality, adult mortality, age-specific mortality, and life expectancy, 1970–2016: a systematic analysis for the Global Burden of Disease Study 2016. *The Lancet* 2017; 390: 1084–150.

Naghavi M, Abajobir AA, Abbafati C, et al. Global, regional, and national age-sex specific mortality for 264 causes of death, 1980–2016: a systematic analysis for the Global Burden of Disease Study 2016. *The Lancet* 2017; 390: 1151–210.

Vos T, Abajobir AA, Abate KH, et al. Global, regional, and national incidence, prevalence, and years lived with disability for 328 diseases and injuries for 195 countries, 1990–2016: a systematic analysis for the Global Burden of Disease Study 2016. *The Lancet* 2017; 390: 1211–59.

Gakidou E, Afshin A, Abajobir AA, et al. Global, regional, and national comparative risk assessment of 84 behavioural, environmental and occupational, and metabolic risks or clusters of risks, 1990–2016: a systematic analysis for the Global Burden of Disease Study 2016. *The Lancet* 2017; 390: 1345–422.

Hay SI, Abajobir AA, Abate KH, et al. Global, regional, and national disability-adjusted life-years (DALYs) for 333 diseases and injuries and healthy life expectancy (HALE) for 195 countries and territories, 1990–2016: a systematic analysis for the Global Burden of Disease Study 2016. *The Lancet* 2017; 390: 1260–344.

<sup>2</sup> Ibid

<sup>3</sup> Ministério da Saúde. Sistema de Informação sobre Mortalidade. 2014. <http://svs.aids.gov.br/cgiae/sim/> (accessed June 20, 2017).

<sup>4</sup> Censo Demográfico 2010. Instituto Brasileiro de Geografia e Estatística. 2015. <http://censo2010.ibge.gov.br/> (accessed June 20, 2017).

To evaluate the completeness of death registration, for every intercensal period we applied three death distribution methods: synthetic extinct generations; generalized growth balance; and a hybrid of the first two methods, as described in detail elsewhere.<sup>5</sup> We use the entire time series of these death distribution estimates of completeness and the completeness of child death registration to generate our time series of registration completeness.<sup>5</sup>

An assessment by Campos de Lima and colleagues estimated that the completeness of death counts increased from about 80% in 1980–1991 to over 95% in 2000–2010, and the percentage of ill-defined causes of death decreased about 53%.<sup>6</sup> Despite these improvements, the GBD found that in 2015, 18% of deaths in Brazil were coded to garbage codes (GC), meaning that the deaths were assigned to ill-defined diagnoses or to conditions that cannot be causes or underlying causes of death. The garbage codes were reassigned to specific ICD codes by age, sex, location, and year using proportional, negative correlation, multiple cause of death, and fixed proportion redistribution methods.

## 2. Mortality

We report data on cause-specific mortality and cause-specific years of life lost (YLLs) due to premature mortality for 264 causes of mortality. For GBD 2016, 68 causes were considered causes of disability but not death, while 5 were considered causes of death but not disability. Cause-specific mortality estimates for each age, sex, and location-year were most commonly generated using the GBD Cause of Death Ensemble model (CODEm) and the CodCorrect process. In CODEm, a variety of models were developed. For each individual model, out-of-sample predictive validity was assessed and models were ranked for use in ensemble modelling. The ensemble with the highest out-of-sample predictive validity was selected from differently weighted combinations of individual models. For causes where there was evidence that children and adults had different relationships between their covariates and death rates, separate models were run for different age ranges. Separate models were also developed for countries with complete, representative, and extensive VR by cause, including Brazil, to ensure that uncertainty reflects the more complete data in those locations. The CoDCorrect process ensures that there is internal consistency between cause-specific and all-cause mortality estimates by rescaling causes up the GBD hierarchy using a core algorithm described in more detail in the GBD cause-specific mortality paper appendix.<sup>6</sup>

## 3. Morbidity

Estimates of morbidity were produced for 328 causes and 2982 sequela for each age, sex, and year. For GBD 2016, 68 causes were considered causes of disability but not death, while 5 were considered causes of death but not disability. To estimate YLDs, the Bayesian meta-regression tool DisMod-MR 2.1 estimated prevalence and incidence for most causes of disease and injury and their non-fatal outcomes, calculated the product of incidence and a specific disability weight for each sequela, adjusted for comorbidity, and aggregated to cause-level, ensuring consistency for each condition. Several causes were estimated using custom models; details of these causes and their

---

<sup>5</sup> Naghavi M, Abajobir AA, Abbafati C, et al. Global, regional, and national age-sex specific mortality for 264 causes of death, 1980–2016: a systematic analysis for the Global Burden of Disease Study 2016. *The Lancet* 2017; 390: 1151–210.

<sup>6</sup> Lima, E. E. C. D., & Queiroz, B. L. (2014). Evolution of the deaths registry system in Brazil: associations with changes in the mortality profile, under-registration of death counts, and ill-defined causes of death. *Cadernos de Saúde Pública* 2014; 30(8), 1721-1730. <http://dx.doi.org/10.1590/0102-311X00131113>

modelling strategy can be found in the GBD YLDs publication. YLDs were estimated for all mutually exclusive sequelae by multiplying prevalence by a disability weight, then correcting for comorbidity and aggregating to cause level.

#### 4. Disability-adjusted life-years

DALYs are a combined measure of mortality and morbidity. They are calculated by summing YLLs and YLDs for each age, sex, location, and year.

#### 5. Risk factors

Deaths, YLLs, YLDs, and DALYs attributable to 84 risk factors or clusters of risk factors were assessed in GBD 2016. For each risk-outcome pair, relative risks of mortality and morbidity were estimated on the basis of meta-analyses of the literature. Second, exposure to each risk factor in each country and Brazilian state by age, sex, and year was estimated on the basis of published and unpublished data with primarily Bayesian estimation methods. Finally, attributable deaths or DALYs were estimated by comparing the present distribution of exposure to a theoretical minimum risk distribution of exposure selected for each risk factor. Each risk, exposure estimate, and theoretical minimum risk distribution and uncertainty in the background outcome rates have been propagated into the final estimates.

#### 6. Socio-demographic Index

The Socio-demographic-Index (SDI) is a summary indicator based on average lag-dependent income per capita, total fertility rate in the population, and years of education attained in the population over 15 years of age, calculated as the geometric mean of the rescaled (0-1) values of the three components for each location-year. The 2016 SDI score for Brazil was 0.71. GBD 2016 grouped locations into low, low-middle, middle, high-middle, and high SDI for analysis.

##### *Expected values calculation*

Gaussian process regression was used to estimate the relationship between SDI and each age-sex-cause death rate. These relationships were used to estimate expected YLLs based on SDI alone for each age, sex, location, and year.

##### *Scale of SDI*

For each component of the SDI, 0 represents a theoretical minimum level of development for the selected health outcomes and 1 represents a theoretical maximum level of development for the selected health outcomes. Thresholds were set based on the relationship between each component with under 5 mortality rates and life expectancy at birth and identified points of limiting returns if they occurred prior to theoretical limits.

#### 7. Uncertainty levels

Uncertainty levels were propagated at multiple stages throughout the GBD modelling process. Uncertainty for mortality and YLLs reflected uncertainty in the levels of all-cause mortality and uncertainty in the estimation of each mortality cause, in each age group, sex, and year. Uncertainty in the disability weight for each sequela was propagated into the estimates of YLDs for each disease and injury. A sample of 1,000 draws was taken from the posterior distribution of each estimation step; aggregation of uncertainty across age, sex, and location was performed on each draw,

assuming independence of uncertainty. The lower and upper uncertainty intervals (UI) represent the ordinal 25th and 975th draws of each quantity and attempt to describe modelling as well as sampling error.
